# Supplementary material for: Machine learning for predicting lifespan-extending chemical compounds
Source: Aging (Albany NY). 2017 Jul 18;9(7):1721–36. doi: 10.18632/aging.101264 (PMC5559171; doi:10.18632/aging.101264)
Supplement: Supplementary file 1 [file aging-09-1721-s001.xlsx]

## Sheet: Summary
Supporting Information
This document contains the supporting information for the manuscript "Machine Learning for Predicting Lifespan-Extending Chemical Compounds "
Tab name	Description
Table S1	Table of chemical compounds that increase or have no effect/decrease longevity in C.elegans used in this work
Table S2	Table of GO terms and chemical descriptors highlighting those selected via feature selection from the best random forest model
Table S3	Table showing the predicted probabilities for Longevity effects for the external dataset DGIdb compounds

## Sheet: Table S1
Table S1: Dataset of chemical compounds that increase or have no effect/decrease longevity in C.elegans
The table below shows all of the compounds used to build predicitve models in the work. The table includes the chemical name, SMILES code used to calculate chemical molecular descriptors, literature reference and longevity class label.
Chemical Name	Chemical SMILES code	Reference	Longevity Class
Succinimide	O=C1NC(=O)CC1	Evason, K. et al., 2005. Anticonvulsant medications extend worm life-span. Science (New York, N.Y.), 307(5707), pp.258–262.	NEGATIVE
Flurazepam dihydrochloride	Clc1cc2c(N(CCN(CC)CC)C(=O)CN=C2c2ccccc2F)cc1	Kornfeld, K. & Evason, K., 2006. Effects of anticonvulsant drugs on life span. Archives of neurology, 63(4), pp.491–496.	NEGATIVE
Betamethasone 17-valerate	FC12[C@@H]([C@@H]3C[C@H](C)C(OC(=O)CCCC)(C(=O)CO)C3(C[C@H]1O)C)CCC1=CC(=O)C=CC12C	Kornfeld, K. & Evason, K., 2006. Effects of anticonvulsant drugs on life span. Archives of neurology, 63(4), pp.491–496.	NEGATIVE
Liothyronine sodium salt	Ic1cc(cc(I)c1Oc1cc(I)c(O)cc1)C[C@@H](N)C(O)=O	Kornfeld, K. & Evason, K., 2006. Effects of anticonvulsant drugs on life span. Archives of neurology, 63(4), pp.491–496.	NEGATIVE
Nadolol	O(C[C@H](O)CNC(C)(C)C)c1c2C[C@@H](O)[C@@H](O)Cc2ccc1	Kornfeld, K. & Evason, K., 2006. Effects of anticonvulsant drugs on life span. Archives of neurology, 63(4), pp.491–496.	NEGATIVE
Dehydroisoandrosterone	O=C1CC[C@H]2[C@H]3[C@@H](CCC12C)C1(C(C[C@H](O)CC1)=CC3)C	Kornfeld, K. & Evason, K., 2006. Effects of anticonvulsant drugs on life span. Archives of neurology, 63(4), pp.491–496.	NEGATIVE
Prednisone	OC1(CC[C@H]2[C@H]3[C@H](C4(C(=CC(=O)C=C4)CC3)C)C(=O)CC12C)C(=O)CO	Kornfeld, K. & Evason, K., 2006. Effects of anticonvulsant drugs on life span. Archives of neurology, 63(4), pp.491–496.	NEGATIVE
Amprolium	[n+]1(ccccc1C)Cc1cnc(nc1N)CCC	Lublin, A. et al., 2011. FDA-approved drugs that protect mammalian neurons from glucose toxicity slow aging dependent on cbp and protect against proteotoxicity. PloS one, 6(11), p.e27762.	NEGATIVE
Bithionol	Clc1cc(Cl)cc(Sc2cc(Cl)cc(Cl)c2O)c1O	Lublin, A. et al., 2011. FDA-approved drugs that protect mammalian neurons from glucose toxicity slow aging dependent on cbp and protect against proteotoxicity. PloS one, 6(11), p.e27762.	NEGATIVE
Dihydrojasmonic acid	O=C1CC[C@H](CC(O)=O)[C@H]1CCCCC	Lublin, A. et al., 2011. FDA-approved drugs that protect mammalian neurons from glucose toxicity slow aging dependent on cbp and protect against proteotoxicity. PloS one, 6(11), p.e27762.	NEGATIVE
Antipyrine	O=C1N(N(C)C(=C1)C)c1ccccc1	Lublin, A. et al., 2011. FDA-approved drugs that protect mammalian neurons from glucose toxicity slow aging dependent on cbp and protect against proteotoxicity. PloS one, 6(11), p.e27762.	NEGATIVE
Piperine	O1c2cc(ccc2OC1)\C=C\C=C\C(=O)N1CCCCC1	Lublin, A. et al., 2011. FDA-approved drugs that protect mammalian neurons from glucose toxicity slow aging dependent on cbp and protect against proteotoxicity. PloS one, 6(11), p.e27762.	NEGATIVE
Aesculin	O1c2cc(O)c(O[C@H]3O[C@H](CO)[C@H](O)[C@H](O)[C@@H]3O)cc2C=CC1=O	Lublin, A. et al., 2011. FDA-approved drugs that protect mammalian neurons from glucose toxicity slow aging dependent on cbp and protect against proteotoxicity. PloS one, 6(11), p.e27762.	NEGATIVE
Potassium p-aminobenzoate	OC(=O)c1ccc(N)cc1	Lublin, A. et al., 2011. FDA-approved drugs that protect mammalian neurons from glucose toxicity slow aging dependent on cbp and protect against proteotoxicity. PloS one, 6(11), p.e27762.	NEGATIVE
Fenbufen	OC(=O)CCC(=O)c1ccc(cc1)-c1ccccc1	Lublin, A. et al., 2011. FDA-approved drugs that protect mammalian neurons from glucose toxicity slow aging dependent on cbp and protect against proteotoxicity. PloS one, 6(11), p.e27762.	NEGATIVE
Sodium p-aminosalicylate	Oc1cc(N)ccc1C(O)=O	Lublin, A. et al., 2011. FDA-approved drugs that protect mammalian neurons from glucose toxicity slow aging dependent on cbp and protect against proteotoxicity. PloS one, 6(11), p.e27762.	NEGATIVE
Busulfan	S(OCCCCOS(=O)(=O)C)(=O)(=O)C	Lublin, A. et al., 2011. FDA-approved drugs that protect mammalian neurons from glucose toxicity slow aging dependent on cbp and protect against proteotoxicity. PloS one, 6(11), p.e27762.	NEGATIVE
Prothionamide	S=C(N)c1cc(ncc1)CCC	Lublin, A. et al., 2011. FDA-approved drugs that protect mammalian neurons from glucose toxicity slow aging dependent on cbp and protect against proteotoxicity. PloS one, 6(11), p.e27762.	NEGATIVE
2-Thiouracil	S=C1NC(=O)C=CN1	Lublin, A. et al., 2011. FDA-approved drugs that protect mammalian neurons from glucose toxicity slow aging dependent on cbp and protect against proteotoxicity. PloS one, 6(11), p.e27762.	NEGATIVE
N,N,N-trimethyl-1-(4-trans-stilbenoxy)-2-propylammonium iodide	O(C[C@H]([N+](C)(C)C)C)c1ccc(cc1)\C=C\c1ccccc1	Ye, X. et al., 2014. A pharmacological network for lifespan extension in Caenorhabditis elegans. Aging cell, 13(2), pp.206–215.	NEGATIVE
(±)-threo-1-Phenyl-2-decanoylamino-3-morpholino-1-propanol hydrochloride	O1CCN(CC1)C[C@@H](NC(=O)CCCCCCCCC)[C@H](O)c1ccccc1	Ye, X. et al., 2014. A pharmacological network for lifespan extension in Caenorhabditis elegans. Aging cell, 13(2), pp.206–215.	NEGATIVE
4-Chloromercuribenzoic acid	[Hg](Cl)c1ccc(cc1)C(O)=O	Ye, X. et al., 2014. A pharmacological network for lifespan extension in Caenorhabditis elegans. Aging cell, 13(2), pp.206–215.	NEGATIVE
Tetraethylammonium chloride	[N+](CC)(CC)(CC)CC	Ye, X. et al., 2014. A pharmacological network for lifespan extension in Caenorhabditis elegans. Aging cell, 13(2), pp.206–215.	NEGATIVE
Decamethonium dibromide	[N+](CCCCCCCCCC[N+](C)(C)C)(C)(C)C	Ye, X. et al., 2014. A pharmacological network for lifespan extension in Caenorhabditis elegans. Aging cell, 13(2), pp.206–215.	NEGATIVE
Dequalinium dichloride	[n+]1(c2c(cccc2)c(N)cc1C)CCCCCCCCCC[n+]1c2c(cccc2)c(N)cc1C	Ye, X. et al., 2014. A pharmacological network for lifespan extension in Caenorhabditis elegans. Aging cell, 13(2), pp.206–215.	NEGATIVE
Pentolinium di[L(+)-tartrate]	[N+]1(CCCC1)(CCCCC[N+]1(CCCC1)C)C	Ye, X. et al., 2014. A pharmacological network for lifespan extension in Caenorhabditis elegans. Aging cell, 13(2), pp.206–215.	NEGATIVE
1,1-Dimethyl-4-phenyl-piperazinium iodide	[N+]1(CCN(CC1)c1ccccc1)(C)C	Ye, X. et al., 2014. A pharmacological network for lifespan extension in Caenorhabditis elegans. Aging cell, 13(2), pp.206–215.	NEGATIVE
Ellipticine	[nH]1c2c(c3c1cccc3)c(c1c(ccnc1)c2C)C	Ye, X. et al., 2014. A pharmacological network for lifespan extension in Caenorhabditis elegans. Aging cell, 13(2), pp.206–215.	NEGATIVE
Harmane	[nH]1c2c(c3c1cccc3)ccnc2C	Ye, X. et al., 2014. A pharmacological network for lifespan extension in Caenorhabditis elegans. Aging cell, 13(2), pp.206–215.	NEGATIVE
Ro 90-7501	[nH]1c2cc(ccc2nc1-c1ccc(N)cc1)-c1[nH]c2cc(N)ccc2n1	Ye, X. et al., 2014. A pharmacological network for lifespan extension in Caenorhabditis elegans. Aging cell, 13(2), pp.206–215.	NEGATIVE
LE 300	[nH]1c2Cc3c(CCN(CCc2c2c1cccc2)C)cccc3	Ye, X. et al., 2014. A pharmacological network for lifespan extension in Caenorhabditis elegans. Aging cell, 13(2), pp.206–215.	NEGATIVE
Antozoline hydrochloride	[nH]1ccnc1CN(Cc1ccccc1)c1ccccc1	Ye, X. et al., 2014. A pharmacological network for lifespan extension in Caenorhabditis elegans. Aging cell, 13(2), pp.206–215.	NEGATIVE
Histamine, R(-)-alpha-methyl-, dihydrochloride	[nH]1cncc1C[C@H](N)C	Ye, X. et al., 2014. A pharmacological network for lifespan extension in Caenorhabditis elegans. Aging cell, 13(2), pp.206–215.	NEGATIVE
4-Methylpyrazole hydrochloride	[nH]1ncc(c1)C	Ye, X. et al., 2014. A pharmacological network for lifespan extension in Caenorhabditis elegans. Aging cell, 13(2), pp.206–215.	NEGATIVE
(±)-Quinpirole dihydrochloride	[nH]1ncc2c1C[C@H]1[C@@H](N(CCC1)CCC)C2	Ye, X. et al., 2014. A pharmacological network for lifespan extension in Caenorhabditis elegans. Aging cell, 13(2), pp.206–215.	NEGATIVE
5,5-Dimethyl-1-pyrroline-N-oxide	[O-][N+]1=CCCC1(C)C	Ye, X. et al., 2014. A pharmacological network for lifespan extension in Caenorhabditis elegans. Aging cell, 13(2), pp.206–215.	NEGATIVE
Betaine aldehyde chloride	[O-]\C=C\[N+](C)(C)C	Ye, X. et al., 2014. A pharmacological network for lifespan extension in Caenorhabditis elegans. Aging cell, 13(2), pp.206–215.	NEGATIVE
Se-(methyl)selenocysteine hydrochloride	[Se](C[C@@H](N)C(O)=O)C	Ye, X. et al., 2014. A pharmacological network for lifespan extension in Caenorhabditis elegans. Aging cell, 13(2), pp.206–215.	NEGATIVE
Sandoz 58-035	[Si](CCCCCCCCCC)(CCC(=O)N[C@H](Cc1ccc(cc1)C)c1ccccc1)(C)C	Ye, X. et al., 2014. A pharmacological network for lifespan extension in Caenorhabditis elegans. Aging cell, 13(2), pp.206–215.	NEGATIVE
Bromoenol lactone	Br\C=C\1/OC(=O)[C@@H](CC/1)c1c2c(ccc1)cccc2	Ye, X. et al., 2014. A pharmacological network for lifespan extension in Caenorhabditis elegans. Aging cell, 13(2), pp.206–215.	NEGATIVE
(E)-5-(2-Bromovinyl)-2'-deoxyuridine	Br\C=C\C1=CN([C@H]2O[C@H](CO)[C@H](O)C2)C(=O)NC1=O	Ye, X. et al., 2014. A pharmacological network for lifespan extension in Caenorhabditis elegans. Aging cell, 13(2), pp.206–215.	NEGATIVE
ARL 67156 trisodium salt	BrC(Br)(P(OP(OC[C@H]1O[C@H](n2c3ncnc(N(CC)CC)c3nc2)[C@@H](O)[C@H]1O)(O)=O)(O)=O)P(O)(O)=O	Ye, X. et al., 2014. A pharmacological network for lifespan extension in Caenorhabditis elegans. Aging cell, 13(2), pp.206–215.	NEGATIVE
(+)-Bromocriptine methanesulfonate	Brc1[nH]c2c3c1C[C@H]1N(C[C@H](C=C1c3ccc2)C(=O)NC1(OC2(O)N([C@H](CC(C)C)C(=O)N3[C@@H]2CCC3)C1=O)C(C)C)C	Ye, X. et al., 2014. A pharmacological network for lifespan extension in Caenorhabditis elegans. Aging cell, 13(2), pp.206–215.	NEGATIVE
3-Bromo-7-nitroindazole	Brc1[nH]nc2c1cccc2[N+](=O)[O-]	Ye, X. et al., 2014. A pharmacological network for lifespan extension in Caenorhabditis elegans. Aging cell, 13(2), pp.206–215.	NEGATIVE
5-Bromo-2'-deoxyuridine	BrC1=CN([C@H]2O[C@H](CO)[C@H](O)C2)C(=O)NC1=O	Ye, X. et al., 2014. A pharmacological network for lifespan extension in Caenorhabditis elegans. Aging cell, 13(2), pp.206–215.	NEGATIVE
CK2 Inhibitor 2	Brc1c(Br)c(Br)c2[nH]c(nc2c1Br)N(C)C	Ye, X. et al., 2014. A pharmacological network for lifespan extension in Caenorhabditis elegans. Aging cell, 13(2), pp.206–215.	NEGATIVE
TBB	Brc1c(Br)c(Br)c2n[nH]nc2c1Br	Ye, X. et al., 2014. A pharmacological network for lifespan extension in Caenorhabditis elegans. Aging cell, 13(2), pp.206–215.	NEGATIVE
R(+)-6-Bromo-APB hydrobromide	Brc1c2c(cc(O)c1O)[C@H](CN(CC2)CC=C)c1ccccc1	Ye, X. et al., 2014. A pharmacological network for lifespan extension in Caenorhabditis elegans. Aging cell, 13(2), pp.206–215.	NEGATIVE
VER-3323 hemifumarate salt	Brc1cc2N(CCc2cc1)C[C@H](N)C	Ye, X. et al., 2014. A pharmacological network for lifespan extension in Caenorhabditis elegans. Aging cell, 13(2), pp.206–215.	NEGATIVE
NS 2028	Brc1cc2N3C(=NOC3=O)COc2cc1	Ye, X. et al., 2014. A pharmacological network for lifespan extension in Caenorhabditis elegans. Aging cell, 13(2), pp.206–215.	NEGATIVE
BIO	Brc1cc2NC(=O)/C(/c2cc1)=C\1/N=C2C(C=CC=C2)=C/1NO	Ye, X. et al., 2014. A pharmacological network for lifespan extension in Caenorhabditis elegans. Aging cell, 13(2), pp.206–215.	NEGATIVE
S(-)-p-Bromotetramisole oxalate	Brc1ccc(cc1)[C@@H]1N=C2SCCN2C1	Ye, X. et al., 2014. A pharmacological network for lifespan extension in Caenorhabditis elegans. Aging cell, 13(2), pp.206–215.	NEGATIVE
Zimelidine dihydrochloride	Brc1ccc(cc1)\C(=C\CN(C)C)\c1cccnc1	Ye, X. et al., 2014. A pharmacological network for lifespan extension in Caenorhabditis elegans. Aging cell, 13(2), pp.206–215.	NEGATIVE
H-89	Brc1ccc(cc1)\C=C\CNCCNS(=O)(=O)c1c2c(ccc1)cncc2	Ye, X. et al., 2014. A pharmacological network for lifespan extension in Caenorhabditis elegans. Aging cell, 13(2), pp.206–215.	NEGATIVE
Bretylium tosylate	Brc1ccccc1C[N+](CC)(C)C	Ye, X. et al., 2014. A pharmacological network for lifespan extension in Caenorhabditis elegans. Aging cell, 13(2), pp.206–215.	NEGATIVE
DSP-4 hydrochloride	Brc1ccccc1CN(CCCl)CC	Ye, X. et al., 2014. A pharmacological network for lifespan extension in Caenorhabditis elegans. Aging cell, 13(2), pp.206–215.	NEGATIVE
8-Bromo-cGMP sodium	Brc1nc2c(n1[C@H]1O[C@H]3[C@@H](OP(OC3)(O)=O)[C@H]1O)NC(=NC2=O)N	Ye, X. et al., 2014. A pharmacological network for lifespan extension in Caenorhabditis elegans. Aging cell, 13(2), pp.206–215.	NEGATIVE
8-Bromo-cAMP sodium	Brc1nc2c(ncnc2N)n1[C@H]1O[C@H]2[C@@H](OP(OC2)(O)=O)[C@H]1O	Ye, X. et al., 2014. A pharmacological network for lifespan extension in Caenorhabditis elegans. Aging cell, 13(2), pp.206–215.	NEGATIVE
Bromoacetyl alprenolol menthane	BrCC(=O)NC(C)(C)[C@H]1CC(NC[C@@H](O)COc2ccccc2CC=C)(CCC1)C	Ye, X. et al., 2014. A pharmacological network for lifespan extension in Caenorhabditis elegans. Aging cell, 13(2), pp.206–215.	NEGATIVE
Bromoacetylcholine bromide	BrCC(OCC[N+](C)(C)C)=O	Ye, X. et al., 2014. A pharmacological network for lifespan extension in Caenorhabditis elegans. Aging cell, 13(2), pp.206–215.	NEGATIVE
N-Bromoacetamide	BrNC(=O)C	Ye, X. et al., 2014. A pharmacological network for lifespan extension in Caenorhabditis elegans. Aging cell, 13(2), pp.206–215.	NEGATIVE
2-Chloro-2-deoxy-D-glucose	Cl[C@H]([C@H](O)[C@H](O)[C@H](O)CO)C=O	Ye, X. et al., 2014. A pharmacological network for lifespan extension in Caenorhabditis elegans. Aging cell, 13(2), pp.206–215.	NEGATIVE
Clodronic acid	ClC(Cl)(P(O)(O)=O)P(O)(O)=O	Ye, X. et al., 2014. A pharmacological network for lifespan extension in Caenorhabditis elegans. Aging cell, 13(2), pp.206–215.	NEGATIVE
beta-Chloro-L-alanine hydrochloride	ClC[C@@H](N)C(O)=O	Ye, X. et al., 2014. A pharmacological network for lifespan extension in Caenorhabditis elegans. Aging cell, 13(2), pp.206–215.	NEGATIVE
Cefaclor	ClC=1CS[C@H]2N(C=1C(O)=O)C(=O)[C@@H]2NC(=O)[C@@H](N)c1ccccc1	Ye, X. et al., 2014. A pharmacological network for lifespan extension in Caenorhabditis elegans. Aging cell, 13(2), pp.206–215.	NEGATIVE
Ciprofibrate	ClC1(Cl)C[C@H]1c1ccc(OC(C(O)=O)(C)C)cc1	Ye, X. et al., 2014. A pharmacological network for lifespan extension in Caenorhabditis elegans. Aging cell, 13(2), pp.206–215.	NEGATIVE
CB34	ClC1=CC(Cl)=Cn2c1nc(-c1ccc(Cl)cc1)c2CC(=O)N(CCC)CCC	Ye, X. et al., 2014. A pharmacological network for lifespan extension in Caenorhabditis elegans. Aging cell, 13(2), pp.206–215.	NEGATIVE
Beclomethasone	ClC12[C@H]([C@H]3C[C@@H](C)C(O)(C(=O)CO)C3(C[C@@H]1O)C)CCC1=CC(=O)C=CC12C	Ye, X. et al., 2014. A pharmacological network for lifespan extension in Caenorhabditis elegans. Aging cell, 13(2), pp.206–215.	NEGATIVE
Lamotrigine	Clc1c(cccc1Cl)-c1nnc(nc1N)N	Ye, X. et al., 2014. A pharmacological network for lifespan extension in Caenorhabditis elegans. Aging cell, 13(2), pp.206–215.	NEGATIVE
Felodipine	Clc1c(cccc1Cl)[C@@H]1C(C(OCC)=O)=C(NC(C)=C1C(OC)=O)C	Ye, X. et al., 2014. A pharmacological network for lifespan extension in Caenorhabditis elegans. Aging cell, 13(2), pp.206–215.	NEGATIVE
(±)-2,3-Dichloro-alpha-methylbenzylamine hydrochloride	Clc1c(cccc1Cl)[C@H](N)C	Ye, X. et al., 2014. A pharmacological network for lifespan extension in Caenorhabditis elegans. Aging cell, 13(2), pp.206–215.	NEGATIVE
NBI 27914	Clc1c(nc(nc1N(CC1CC1)CCC)C)Nc1c(Cl)cc(Cl)cc1Cl	Ye, X. et al., 2014. A pharmacological network for lifespan extension in Caenorhabditis elegans. Aging cell, 13(2), pp.206–215.	NEGATIVE
Meclofenamic acid sodium	Clc1c(Nc2ccccc2C(O)=O)c(Cl)ccc1C	Ye, X. et al., 2014. A pharmacological network for lifespan extension in Caenorhabditis elegans. Aging cell, 13(2), pp.206–215.	NEGATIVE
R(+)-IAA-94	Clc1c(OCC(O)=O)cc2c(C(=O)C(C2)(C)C2CCCC2)c1Cl	Ye, X. et al., 2014. A pharmacological network for lifespan extension in Caenorhabditis elegans. Aging cell, 13(2), pp.206–215.	NEGATIVE
R(+)-Butylindazone	Clc1c(OCC(O)=O)cc2c(C(=O)C(C2)(CCCC)C2CCCC2)c1Cl	Ye, X. et al., 2014. A pharmacological network for lifespan extension in Caenorhabditis elegans. Aging cell, 13(2), pp.206–215.	NEGATIVE
MDL 105,519	Clc1c2c([nH]c(C(O)=O)c2\C=C(/C(O)=O)\c2ccccc2)cc(Cl)c1	Ye, X. et al., 2014. A pharmacological network for lifespan extension in Caenorhabditis elegans. Aging cell, 13(2), pp.206–215.	NEGATIVE
SKF 83959 hydrobromide	Clc1c2c(cc(O)c1O)[C@@H](CN(CC2)C)c1cc(ccc1)C	Ye, X. et al., 2014. A pharmacological network for lifespan extension in Caenorhabditis elegans. Aging cell, 13(2), pp.206–215.	NEGATIVE
Fenoldopam bromide	Clc1c2c(cc(O)c1O)[C@@H](CNCC2)c1ccc(O)cc1	Ye, X. et al., 2014. A pharmacological network for lifespan extension in Caenorhabditis elegans. Aging cell, 13(2), pp.206–215.	NEGATIVE
(±)-6-Chloro-PB hydrobromide	Clc1c2c(cc(O)c1O)[C@@H](CNCC2)c1ccccc1	Ye, X. et al., 2014. A pharmacological network for lifespan extension in Caenorhabditis elegans. Aging cell, 13(2), pp.206–215.	NEGATIVE
SKF 83565 hydrobromide	Clc1c2c(cc(O)c1O)[C@H](CN(CC2)C)c1cc(Cl)ccc1	Ye, X. et al., 2014. A pharmacological network for lifespan extension in Caenorhabditis elegans. Aging cell, 13(2), pp.206–215.	NEGATIVE
(±)-Chloro-APB hydrobromide	Clc1c2c(cc(O)c1O)[C@H](CN(CC2)CC=C)c1ccccc1	Ye, X. et al., 2014. A pharmacological network for lifespan extension in Caenorhabditis elegans. Aging cell, 13(2), pp.206–215.	NEGATIVE
ML-9	Clc1c2c(ccc1)c(S(=O)(=O)N1CCCNCC1)ccc2	Ye, X. et al., 2014. A pharmacological network for lifespan extension in Caenorhabditis elegans. Aging cell, 13(2), pp.206–215.	NEGATIVE
W-7 hydrochloride	Clc1c2c(ccc1)c(S(=O)(=O)NCCCCCCN)ccc2	Ye, X. et al., 2014. A pharmacological network for lifespan extension in Caenorhabditis elegans. Aging cell, 13(2), pp.206–215.	NEGATIVE
A3 hydrochloride	Clc1c2c(ccc1)c(S(=O)(=O)NCCN)ccc2	Ye, X. et al., 2014. A pharmacological network for lifespan extension in Caenorhabditis elegans. Aging cell, 13(2), pp.206–215.	NEGATIVE
5,7-Dichlorokynurenic acid	Clc1c2c(NC(=CC2=O)C(O)=O)cc(Cl)c1	Ye, X. et al., 2014. A pharmacological network for lifespan extension in Caenorhabditis elegans. Aging cell, 13(2), pp.206–215.	NEGATIVE
SKF 86466	Clc1c2CCN(CCc2ccc1)C	Ye, X. et al., 2014. A pharmacological network for lifespan extension in Caenorhabditis elegans. Aging cell, 13(2), pp.206–215.	NEGATIVE
Quazinone	Clc1c2CN3C(=NC(=O)[C@H]3C)Nc2ccc1	Ye, X. et al., 2014. A pharmacological network for lifespan extension in Caenorhabditis elegans. Aging cell, 13(2), pp.206–215.	NEGATIVE
Vancomycin hydrochloride	Clc1c2Oc3cc4[C@H](NC(=O)[C@@H](NC(=O)[C@H](NC(=O)[C@@H](NC)CC(C)C)[C@H](O)c(c1)cc2)CC(=O)N)C(=O)N[C@@H]1c2cc(-c5c(cc(O)cc5O)[C@H](NC(=O)[C@@H](NC1=O)[C@@H](O)c1cc(Cl)c(Oc(c4)c3O[C@H]3O[C@H](CO)[C@H](O)[C@H](O)[C@H]3O[C@H]3O[C@H](C)[C@@H](O)C(N)(C3)C)cc1)C(O)=O)c(O)cc2	Ye, X. et al., 2014. A pharmacological network for lifespan extension in Caenorhabditis elegans. Aging cell, 13(2), pp.206–215.	NEGATIVE
Niclosamide	Clc1cc([N+](=O)[O-])ccc1NC(=O)c1cc(Cl)ccc1O	Ye, X. et al., 2014. A pharmacological network for lifespan extension in Caenorhabditis elegans. Aging cell, 13(2), pp.206–215.	NEGATIVE
1-(m-Chlorophenyl)-biguanide hydrochloride	Clc1cc(\N=C(\N=C(N)N)/N)ccc1	Ye, X. et al., 2014. A pharmacological network for lifespan extension in Caenorhabditis elegans. Aging cell, 13(2), pp.206–215.	NEGATIVE
McN-A-343	Clc1cc(\N=C(\OCC#CC[N+](C)(C)C)/[O-])ccc1	Ye, X. et al., 2014. A pharmacological network for lifespan extension in Caenorhabditis elegans. Aging cell, 13(2), pp.206–215.	NEGATIVE
Glibenclamide	Clc1cc(C(=O)NCCc2ccc(S(=O)(=O)NC(=O)NC3CCCCC3)cc2)c(OC)cc1	Ye, X. et al., 2014. A pharmacological network for lifespan extension in Caenorhabditis elegans. Aging cell, 13(2), pp.206–215.	NEGATIVE
Metoclopramide hydrochloride	Clc1cc(C(=O)NCCN(CC)CC)c(OC)cc1N	Ye, X. et al., 2014. A pharmacological network for lifespan extension in Caenorhabditis elegans. Aging cell, 13(2), pp.206–215.	NEGATIVE
SDZ-205,557 hydrochloride	Clc1cc(C(OCCN(CC)CC)=O)c(OC)cc1N	Ye, X. et al., 2014. A pharmacological network for lifespan extension in Caenorhabditis elegans. Aging cell, 13(2), pp.206–215.	NEGATIVE
ML 10302	Clc1cc(C(OCCN2CCCCC2)=O)c(OC)cc1N	Ye, X. et al., 2014. A pharmacological network for lifespan extension in Caenorhabditis elegans. Aging cell, 13(2), pp.206–215.	NEGATIVE
SB 204070 hydrochloride	Clc1cc(c2OCCOc2c1N)C(OCC1CCN(CC1)CCCC)=O	Ye, X. et al., 2014. A pharmacological network for lifespan extension in Caenorhabditis elegans. Aging cell, 13(2), pp.206–215.	NEGATIVE
3-Tropanyl-3,5-dichlorobenzoate	Clc1cc(cc(Cl)c1)C(OC1C[C@@H]2N([C@@H](C1)CC2)C)=O	Ye, X. et al., 2014. A pharmacological network for lifespan extension in Caenorhabditis elegans. Aging cell, 13(2), pp.206–215.	NEGATIVE
Chloroethylclonidine dihydrochloride	Clc1cc(cc(Cl)c1NC=1NCCN=1)CN(CCCl)C	Ye, X. et al., 2014. A pharmacological network for lifespan extension in Caenorhabditis elegans. Aging cell, 13(2), pp.206–215.	NEGATIVE
S-(-)-Eticlopride hydrochloride	Clc1cc(CC)c(O)c(C(=O)NC[C@@H]2CCN(C2)CC)c1OC	Ye, X. et al., 2014. A pharmacological network for lifespan extension in Caenorhabditis elegans. Aging cell, 13(2), pp.206–215.	NEGATIVE
CL 316,243	Clc1cc(ccc1)[C@H](O)CN[C@@H](Cc1cc2OC(Oc2cc1)(C(O)=O)C(O)=O)C	Ye, X. et al., 2014. A pharmacological network for lifespan extension in Caenorhabditis elegans. Aging cell, 13(2), pp.206–215.	NEGATIVE
BRL 37344 sodium	Clc1cc(ccc1)[C@H](O)CN[C@@H](Cc1ccc(OCC(O)=O)cc1)C	Ye, X. et al., 2014. A pharmacological network for lifespan extension in Caenorhabditis elegans. Aging cell, 13(2), pp.206–215.	NEGATIVE
8-(3-Chlorostyryl)caffeine	Clc1cc(ccc1)\C=C\c1nc2N(C)C(=O)N(C)C(=O)c2n1C	Ye, X. et al., 2014. A pharmacological network for lifespan extension in Caenorhabditis elegans. Aging cell, 13(2), pp.206–215.	NEGATIVE
Bupropion hydrochloride	Clc1cc(ccc1)C(=O)[C@H](NC(C)(C)C)C	Ye, X. et al., 2014. A pharmacological network for lifespan extension in Caenorhabditis elegans. Aging cell, 13(2), pp.206–215.	NEGATIVE
Indatraline hydrochloride	Clc1cc(ccc1Cl)[C@@H]1C[C@@H](NC)c2c1cccc2	Ye, X. et al., 2014. A pharmacological network for lifespan extension in Caenorhabditis elegans. Aging cell, 13(2), pp.206–215.	NEGATIVE
Sertraline hydrochloride	Clc1cc(ccc1Cl)[C@@H]1CC[C@@H](NC)c2c1cccc2	Ye, X. et al., 2014. A pharmacological network for lifespan extension in Caenorhabditis elegans. Aging cell, 13(2), pp.206–215.	NEGATIVE
Lorglumide sodium	Clc1cc(ccc1Cl)C(=O)N[C@@H](CCC(O)=O)C(=O)N(CCCCC)CCCCC	Ye, X. et al., 2014. A pharmacological network for lifespan extension in Caenorhabditis elegans. Aging cell, 13(2), pp.206–215.	NEGATIVE
3',4'-Dichlorobenzamil	Clc1cc(ccc1Cl)C\N=C(\NC(=O)c1nc(Cl)c(nc1N)N)/N	Ye, X. et al., 2014. A pharmacological network for lifespan extension in Caenorhabditis elegans. Aging cell, 13(2), pp.206–215.	NEGATIVE
ICI 204,448 hydrochloride	Clc1cc(ccc1Cl)CC(=O)N([C@H](CN1CCCC1)c1cc(OCC(O)=O)ccc1)C	Ye, X. et al., 2014. A pharmacological network for lifespan extension in Caenorhabditis elegans. Aging cell, 13(2), pp.206–215.	NEGATIVE
U-62066	Clc1cc(ccc1Cl)CC(=O)N(C)[C@@H]1CCC2(OCCC2)C[C@@H]1N1CCCC1	Ye, X. et al., 2014. A pharmacological network for lifespan extension in Caenorhabditis elegans. Aging cell, 13(2), pp.206–215.	NEGATIVE
BRL 52537 hydrochloride	Clc1cc(ccc1Cl)CC(=O)N1CCCC[C@@H]1CN1CCCC1	Ye, X. et al., 2014. A pharmacological network for lifespan extension in Caenorhabditis elegans. Aging cell, 13(2), pp.206–215.	NEGATIVE
GR-89696 fumarate	Clc1cc(ccc1Cl)CC(=O)N1CCN(C[C@@H]1CN1CCCC1)C(OC)=O	Ye, X. et al., 2014. A pharmacological network for lifespan extension in Caenorhabditis elegans. Aging cell, 13(2), pp.206–215.	NEGATIVE
AC 915 oxalate	Clc1cc(ccc1Cl)CC(OCCN1CCCC1)=O	Ye, X. et al., 2014. A pharmacological network for lifespan extension in Caenorhabditis elegans. Aging cell, 13(2), pp.206–215.	NEGATIVE
S(+)-Raclopride L-tartrate	Clc1cc(Cl)c(O)c(C(=O)NC[C@@H]2N(CCC2)CC)c1OC	Ye, X. et al., 2014. A pharmacological network for lifespan extension in Caenorhabditis elegans. Aging cell, 13(2), pp.206–215.	NEGATIVE
Ketoconazole	Clc1cc(Cl)ccc1C1(O[C@@H](CO1)COc1ccc(N2CCN(CC2)C(=O)C)cc1)Cn1ccnc1	Ye, X. et al., 2014. A pharmacological network for lifespan extension in Caenorhabditis elegans. Aging cell, 13(2), pp.206–215.	NEGATIVE
SB 216763	Clc1cc(Cl)ccc1C1=C(c2c3c(n(c2)C)cccc3)C(=O)NC1=O	Ye, X. et al., 2014. A pharmacological network for lifespan extension in Caenorhabditis elegans. Aging cell, 13(2), pp.206–215.	NEGATIVE
Calmidazolium chloride	Clc1cc(Cl)ccc1CO[C@H](C[n+]1ccn(c1)C(c1ccc(Cl)cc1)c1ccc(Cl)cc1)c1ccc(Cl)cc1Cl	Ye, X. et al., 2014. A pharmacological network for lifespan extension in Caenorhabditis elegans. Aging cell, 13(2), pp.206–215.	NEGATIVE
Clorgyline hydrochloride	Clc1cc(Cl)ccc1OCCCN(CC#C)C	Ye, X. et al., 2014. A pharmacological network for lifespan extension in Caenorhabditis elegans. Aging cell, 13(2), pp.206–215.	NEGATIVE
TCPOBOP	Clc1cc(Cl)cnc1Oc1ccc(Oc2ncc(Cl)cc2Cl)cc1	Ye, X. et al., 2014. A pharmacological network for lifespan extension in Caenorhabditis elegans. Aging cell, 13(2), pp.206–215.	NEGATIVE
p-Aminoclonidine hydrochloride	Clc1cc(N)cc(Cl)c1NC=1NCCN=1	Ye, X. et al., 2014. A pharmacological network for lifespan extension in Caenorhabditis elegans. Aging cell, 13(2), pp.206–215.	NEGATIVE
N-(4-Amino-2-chlorophenyl)phthalimide	Clc1cc(N)ccc1N1C(=O)c2c(cccc2)C1=O	Ye, X. et al., 2014. A pharmacological network for lifespan extension in Caenorhabditis elegans. Aging cell, 13(2), pp.206–215.	NEGATIVE
Trazodone hydrochloride	Clc1cc(N2CCN(CC2)CCCN2N=C3N(C=CC=C3)C2=O)ccc1	Ye, X. et al., 2014. A pharmacological network for lifespan extension in Caenorhabditis elegans. Aging cell, 13(2), pp.206–215.	NEGATIVE
1-(3-Chlorophenyl)piperazine dihydrochloride	Clc1cc(N2CCNCC2)ccc1	Ye, X. et al., 2014. A pharmacological network for lifespan extension in Caenorhabditis elegans. Aging cell, 13(2), pp.206–215.	NEGATIVE
PQ401	Clc1cc(NC(=O)Nc2cc(nc3c2cccc3)C)c(OC)cc1	Ye, X. et al., 2014. A pharmacological network for lifespan extension in Caenorhabditis elegans. Aging cell, 13(2), pp.206–215.	NEGATIVE
SB 415286	Clc1cc(NC2=C(c3ccccc3[N+](=O)[O-])C(=O)NC2=O)ccc1O	Ye, X. et al., 2014. A pharmacological network for lifespan extension in Caenorhabditis elegans. Aging cell, 13(2), pp.206–215.	NEGATIVE
CGP-74514A hydrochloride	Clc1cc(Nc2nc(nc3n(cnc23)CC)N[C@@H]2CCCC[C@@H]2N)ccc1	Ye, X. et al., 2014. A pharmacological network for lifespan extension in Caenorhabditis elegans. Aging cell, 13(2), pp.206–215.	NEGATIVE
Furosemide	Clc1cc(NCc2occc2)c(cc1S(=O)(=O)N)C(O)=O	Ye, X. et al., 2014. A pharmacological network for lifespan extension in Caenorhabditis elegans. Aging cell, 13(2), pp.206–215.	NEGATIVE
CGS-15943	Clc1cc2-c3n(nc(n3)-c3occc3)C(=Nc2cc1)N	Ye, X. et al., 2014. A pharmacological network for lifespan extension in Caenorhabditis elegans. Aging cell, 13(2), pp.206–215.	NEGATIVE
R(+)-SCH-23390 hydrochloride	Clc1cc2c(cc1O)[C@H](CN(CC2)C)c1ccccc1	Ye, X. et al., 2014. A pharmacological network for lifespan extension in Caenorhabditis elegans. Aging cell, 13(2), pp.206–215.	NEGATIVE
Clomipramine hydrochloride	Clc1cc2N(c3c(CCc2cc1)cccc3)CCCN(C)C	Ye, X. et al., 2014. A pharmacological network for lifespan extension in Caenorhabditis elegans. Aging cell, 13(2), pp.206–215.	NEGATIVE
Chlorpromazine hydrochloride	Clc1cc2N(c3c(Sc2cc1)cccc3)CCCN(C)C	Ye, X. et al., 2014. A pharmacological network for lifespan extension in Caenorhabditis elegans. Aging cell, 13(2), pp.206–215.	NEGATIVE
Prochlorperazine dimaleate	Clc1cc2N(c3c(Sc2cc1)cccc3)CCCN1CCN(CC1)C	Ye, X. et al., 2014. A pharmacological network for lifespan extension in Caenorhabditis elegans. Aging cell, 13(2), pp.206–215.	NEGATIVE
Perphenazine	Clc1cc2N(c3c(Sc2cc1)cccc3)CCCN1CCN(CC1)CCO	Ye, X. et al., 2014. A pharmacological network for lifespan extension in Caenorhabditis elegans. Aging cell, 13(2), pp.206–215.	NEGATIVE
DCEBIO	Clc1cc2N(CC)C(=O)Nc2cc1Cl	Ye, X. et al., 2014. A pharmacological network for lifespan extension in Caenorhabditis elegans. Aging cell, 13(2), pp.206–215.	NEGATIVE
SC 19220	Clc1cc2N(Cc3c(Oc2cc1)cccc3)C(=O)NNC(=O)C	Ye, X. et al., 2014. A pharmacological network for lifespan extension in Caenorhabditis elegans. Aging cell, 13(2), pp.206–215.	NEGATIVE
SB-215505	Clc1cc2N(CCc2cc1C)C(=O)Nc1c2c(ncc1)cccc2	Ye, X. et al., 2014. A pharmacological network for lifespan extension in Caenorhabditis elegans. Aging cell, 13(2), pp.206–215.	NEGATIVE
Metolazone	Clc1cc2N[C@H](N(c3ccccc3C)C(=O)c2cc1S(=O)(=O)N)C	Ye, X. et al., 2014. A pharmacological network for lifespan extension in Caenorhabditis elegans. Aging cell, 13(2), pp.206–215.	NEGATIVE
Cyclothiazide	Clc1cc2N[C@H](NS(=O)(=O)c2cc1S(=O)(=O)N)[C@H]1[C@@H]2C=C[C@@H](C1)C2	Ye, X. et al., 2014. A pharmacological network for lifespan extension in Caenorhabditis elegans. Aging cell, 13(2), pp.206–215.	NEGATIVE
D-ribofuranosylbenzimidazole	Clc1cc2nc([nH]c2cc1Cl)[C@H]1O[C@H](CO)[C@H](O)[C@@H]1O	Ye, X. et al., 2014. A pharmacological network for lifespan extension in Caenorhabditis elegans. Aging cell, 13(2), pp.206–215.	NEGATIVE
7-Chlorokynurenic acid	Clc1cc2NC(=CC(=O)c2cc1)C(O)=O	Ye, X. et al., 2014. A pharmacological network for lifespan extension in Caenorhabditis elegans. Aging cell, 13(2), pp.206–215.	NEGATIVE
6,7-Dichloroquinoxaline-2,3-dione	Clc1cc2NC(=O)C(=O)Nc2cc1Cl	Ye, X. et al., 2014. A pharmacological network for lifespan extension in Caenorhabditis elegans. Aging cell, 13(2), pp.206–215.	NEGATIVE
L-701,324	Clc1cc2NC(=O)C(c3cc(Oc4ccccc4)ccc3)=C(O)c2cc1	Ye, X. et al., 2014. A pharmacological network for lifespan extension in Caenorhabditis elegans. Aging cell, 13(2), pp.206–215.	NEGATIVE
Domperidone	Clc1cc2NC(=O)N(c2cc1)C1CCN(CC1)CCCN1c2c(NC1=O)cccc2	Ye, X. et al., 2014. A pharmacological network for lifespan extension in Caenorhabditis elegans. Aging cell, 13(2), pp.206–215.	NEGATIVE
Clozapine	Clc1cc2NC(N3CCN(CC3)C)=C3C(=Nc2cc1)C=CC=C3	Ye, X. et al., 2014. A pharmacological network for lifespan extension in Caenorhabditis elegans. Aging cell, 13(2), pp.206–215.	NEGATIVE
Chlorzoxazone	Clc1cc2NC(Oc2cc1)=O	Ye, X. et al., 2014. A pharmacological network for lifespan extension in Caenorhabditis elegans. Aging cell, 13(2), pp.206–215.	NEGATIVE
XK469	Clc1cc2nc(Oc3ccc(O[C@@H](C(O)=O)C)cc3)cnc2cc1	Ye, X. et al., 2014. A pharmacological network for lifespan extension in Caenorhabditis elegans. Aging cell, 13(2), pp.206–215.	NEGATIVE
Chlorothiazide	Clc1cc2NC=NS(=O)(=O)c2cc1S(=O)(=O)N	Ye, X. et al., 2014. A pharmacological network for lifespan extension in Caenorhabditis elegans. Aging cell, 13(2), pp.206–215.	NEGATIVE
Chloroquine diphosphate	Clc1cc2nccc(N[C@H](CCCN(CC)CC)C)c2cc1	Ye, X. et al., 2014. A pharmacological network for lifespan extension in Caenorhabditis elegans. Aging cell, 13(2), pp.206–215.	NEGATIVE
Hydrochlorothiazide	Clc1cc2NCNS(=O)(=O)c2cc1S(=O)(=O)N	Ye, X. et al., 2014. A pharmacological network for lifespan extension in Caenorhabditis elegans. Aging cell, 13(2), pp.206–215.	NEGATIVE
Diazoxide	Clc1cc2S(=O)(=O)N=C(Nc2cc1)C	Ye, X. et al., 2014. A pharmacological network for lifespan extension in Caenorhabditis elegans. Aging cell, 13(2), pp.206–215.	NEGATIVE
MRS 2211 sodium salt hydrate	Clc1ccc([N+](=O)[O-])cc1\N=N\c1nc(C)c(O)c(C=O)c1COP(O)(O)=O	Ye, X. et al., 2014. A pharmacological network for lifespan extension in Caenorhabditis elegans. Aging cell, 13(2), pp.206–215.	NEGATIVE
GW9662	Clc1ccc([N+](=O)[O-])cc1C(=O)Nc1ccccc1	Ye, X. et al., 2014. A pharmacological network for lifespan extension in Caenorhabditis elegans. Aging cell, 13(2), pp.206–215.	NEGATIVE
SC-560	Clc1ccc(cc1)-c1n(nc(c1)C(F)(F)F)-c1ccc(OC)cc1	Ye, X. et al., 2014. A pharmacological network for lifespan extension in Caenorhabditis elegans. Aging cell, 13(2), pp.206–215.	NEGATIVE
NCS-356	Clc1ccc(cc1)[C@@H](O)\C=C\C(O)=O	Ye, X. et al., 2014. A pharmacological network for lifespan extension in Caenorhabditis elegans. Aging cell, 13(2), pp.206–215.	NEGATIVE
(±)-Baclofen	Clc1ccc(cc1)[C@H](CC(O)=O)CN	Ye, X. et al., 2014. A pharmacological network for lifespan extension in Caenorhabditis elegans. Aging cell, 13(2), pp.206–215.	NEGATIVE
Phaclofen	Clc1ccc(cc1)[C@H](CN)CP(O)(O)=O	Ye, X. et al., 2014. A pharmacological network for lifespan extension in Caenorhabditis elegans. Aging cell, 13(2), pp.206–215.	NEGATIVE
Chlormezanone	Clc1ccc(cc1)[C@H]1S(=O)(=O)CCC(=O)N1C	Ye, X. et al., 2014. A pharmacological network for lifespan extension in Caenorhabditis elegans. Aging cell, 13(2), pp.206–215.	NEGATIVE
SB-366791	Clc1ccc(cc1)\C=C\C(=O)Nc1cc(OC)ccc1	Ye, X. et al., 2014. A pharmacological network for lifespan extension in Caenorhabditis elegans. Aging cell, 13(2), pp.206–215.	NEGATIVE
PNU-282987	Clc1ccc(cc1)C(=O)N[C@@H]1C2CCN(C1)CC2	Ye, X. et al., 2014. A pharmacological network for lifespan extension in Caenorhabditis elegans. Aging cell, 13(2), pp.206–215.	NEGATIVE
Indomethacin	Clc1ccc(cc1)C(=O)n1c2c(cc(OC)cc2)c(CC(O)=O)c1C	Ye, X. et al., 2014. A pharmacological network for lifespan extension in Caenorhabditis elegans. Aging cell, 13(2), pp.206–215.	NEGATIVE
Ro 16-6491 hydrochloride	Clc1ccc(cc1)C(=O)NCCN	Ye, X. et al., 2014. A pharmacological network for lifespan extension in Caenorhabditis elegans. Aging cell, 13(2), pp.206–215.	NEGATIVE
2-Hydroxysaclofen	Clc1ccc(cc1)C(O)(CN)CS(O)(=O)=O	Ye, X. et al., 2014. A pharmacological network for lifespan extension in Caenorhabditis elegans. Aging cell, 13(2), pp.206–215.	NEGATIVE
Clemastine fumarate	Clc1ccc(cc1)C(OCC[C@H]1N(CCC1)C)(C)c1ccccc1	Ye, X. et al., 2014. A pharmacological network for lifespan extension in Caenorhabditis elegans. Aging cell, 13(2), pp.206–215.	NEGATIVE
(±)-p-Chlorophenylalanine	Clc1ccc(cc1)C[C@@H](N)C(O)=O	Ye, X. et al., 2014. A pharmacological network for lifespan extension in Caenorhabditis elegans. Aging cell, 13(2), pp.206–215.	NEGATIVE
DL-p-Chlorophenylalanine methyl ester	Clc1ccc(cc1)C[C@H](N)C(OC)=O	Ye, X. et al., 2014. A pharmacological network for lifespan extension in Caenorhabditis elegans. Aging cell, 13(2), pp.206–215.	NEGATIVE
L-741,626	Clc1ccc(cc1)C1(O)CCN(CC1)Cc1c2c([nH]c1)cccc2	Ye, X. et al., 2014. A pharmacological network for lifespan extension in Caenorhabditis elegans. Aging cell, 13(2), pp.206–215.	NEGATIVE
Loperamide hydrochloride	Clc1ccc(cc1)C1(O)CCN(CC1)CCC(C(=O)N(C)C)(c1ccccc1)c1ccccc1	Ye, X. et al., 2014. A pharmacological network for lifespan extension in Caenorhabditis elegans. Aging cell, 13(2), pp.206–215.	NEGATIVE
Haloperidol	Clc1ccc(cc1)C1(O)CCN(CC1)CCCC(=O)c1ccc(F)cc1	Ye, X. et al., 2014. A pharmacological network for lifespan extension in Caenorhabditis elegans. Aging cell, 13(2), pp.206–215.	NEGATIVE
Alaproclate hydrochloride	Clc1ccc(cc1)CC(OC(=O)[C@H](N)C)(C)C	Ye, X. et al., 2014. A pharmacological network for lifespan extension in Caenorhabditis elegans. Aging cell, 13(2), pp.206–215.	NEGATIVE
Capsazepine	Clc1ccc(cc1)CCNC(=S)N1CCCc2cc(O)c(O)cc2C1	Ye, X. et al., 2014. A pharmacological network for lifespan extension in Caenorhabditis elegans. Aging cell, 13(2), pp.206–215.	NEGATIVE
MK-886	Clc1ccc(cc1)Cn1c2c(cc(cc2)C(C)C)c(SC(C)(C)C)c1CC(C(O)=O)(C)C	Ye, X. et al., 2014. A pharmacological network for lifespan extension in Caenorhabditis elegans. Aging cell, 13(2), pp.206–215.	NEGATIVE
1-(4-Chlorobenzyl)-5-methoxy-2-methylindole-3-acetic acid	Clc1ccc(cc1)Cn1c2c(cc(OC)cc2)c(CC(O)=O)c1C	Ye, X. et al., 2014. A pharmacological network for lifespan extension in Caenorhabditis elegans. Aging cell, 13(2), pp.206–215.	NEGATIVE
Clemizole hydrochloride	Clc1ccc(cc1)Cn1c2c(nc1CN1CCCC1)cccc2	Ye, X. et al., 2014. A pharmacological network for lifespan extension in Caenorhabditis elegans. Aging cell, 13(2), pp.206–215.	NEGATIVE
L-745,870 hydrochloride	Clc1ccc(N2CCN(CC2)Cc2c3cccnc3[nH]c2)cc1	Ye, X. et al., 2014. A pharmacological network for lifespan extension in Caenorhabditis elegans. Aging cell, 13(2), pp.206–215.	NEGATIVE
Centrophenoxine hydrochloride	Clc1ccc(OCC(OCCN(C)C)=O)cc1	Ye, X. et al., 2014. A pharmacological network for lifespan extension in Caenorhabditis elegans. Aging cell, 13(2), pp.206–215.	NEGATIVE
Chlorpropamide	Clc1ccc(S(=O)(=O)NC(=O)NCCC)cc1	Ye, X. et al., 2014. A pharmacological network for lifespan extension in Caenorhabditis elegans. Aging cell, 13(2), pp.206–215.	NEGATIVE
8-(4-Chlorophenylthio)-cAMP sodium	Clc1ccc(Sc2nc3c(ncnc3N)n2[C@H]2O[C@H]3[C@@H](OP(OC3)(O)=O)[C@H]2O)cc1	Ye, X. et al., 2014. A pharmacological network for lifespan extension in Caenorhabditis elegans. Aging cell, 13(2), pp.206–215.	NEGATIVE
Alinidine	Clc1cccc(Cl)c1N(CC=C)C=1NCCN=1	Ye, X. et al., 2014. A pharmacological network for lifespan extension in Caenorhabditis elegans. Aging cell, 13(2), pp.206–215.	NEGATIVE
IMID-4F hydrochloride	Clc1cccc(Cl)c1N(Cc1cc(F)ccc1)C=1NCCN=1	Ye, X. et al., 2014. A pharmacological network for lifespan extension in Caenorhabditis elegans. Aging cell, 13(2), pp.206–215.	NEGATIVE
Clonidine hydrochloride	Clc1cccc(Cl)c1NC=1NCCN=1	Ye, X. et al., 2014. A pharmacological network for lifespan extension in Caenorhabditis elegans. Aging cell, 13(2), pp.206–215.	NEGATIVE
Diclofenac sodium	Clc1cccc(Cl)c1Nc1ccccc1CC(O)=O	Ye, X. et al., 2014. A pharmacological network for lifespan extension in Caenorhabditis elegans. Aging cell, 13(2), pp.206–215.	NEGATIVE
PK 11195	Clc1ccccc1-c1nc(cc2c1cccc2)C(=O)N([C@H](CC)C)C	Ye, X. et al., 2014. A pharmacological network for lifespan extension in Caenorhabditis elegans. Aging cell, 13(2), pp.206–215.	NEGATIVE
1-(2-Chlorophenyl)-1-(4-chlorophenyl)-2,2-dichloroethane	Clc1ccccc1[C@@H](C(Cl)Cl)c1ccc(Cl)cc1	Ye, X. et al., 2014. A pharmacological network for lifespan extension in Caenorhabditis elegans. Aging cell, 13(2), pp.206–215.	NEGATIVE
Tulobuterol hydrochloride	Clc1ccccc1[C@H](O)CNC(C)(C)C	Ye, X. et al., 2014. A pharmacological network for lifespan extension in Caenorhabditis elegans. Aging cell, 13(2), pp.206–215.	NEGATIVE
Clotrimazole	Clc1ccccc1C(n1ccnc1)(c1ccccc1)c1ccccc1	Ye, X. et al., 2014. A pharmacological network for lifespan extension in Caenorhabditis elegans. Aging cell, 13(2), pp.206–215.	NEGATIVE
Phenamil methanesulfonate	Clc1nc(C(=O)\N=C(\Nc2ccccc2)/N)c(nc1N)N	Ye, X. et al., 2014. A pharmacological network for lifespan extension in Caenorhabditis elegans. Aging cell, 13(2), pp.206–215.	NEGATIVE
Benzamil hydrochloride	Clc1nc(C(=O)N\C(=N\Cc2ccccc2)\N)c(nc1N)N	Ye, X. et al., 2014. A pharmacological network for lifespan extension in Caenorhabditis elegans. Aging cell, 13(2), pp.206–215.	NEGATIVE
5-(N-Ethyl-N-isopropyl)amiloride	Clc1nc(C(=O)N=C(N)N)c(nc1N(C(C)C)CC)N	Ye, X. et al., 2014. A pharmacological network for lifespan extension in Caenorhabditis elegans. Aging cell, 13(2), pp.206–215.	NEGATIVE
5-(N,N-Dimethyl)amiloride hydrochloride	Clc1nc(C(=O)N=C(N)N)c(nc1N(C)C)N	Ye, X. et al., 2014. A pharmacological network for lifespan extension in Caenorhabditis elegans. Aging cell, 13(2), pp.206–215.	NEGATIVE
5-(N-Methyl-N-isobutyl)amiloride	Clc1nc(C(=O)N=C(N)N)c(nc1N(CC(C)C)C)N	Ye, X. et al., 2014. A pharmacological network for lifespan extension in Caenorhabditis elegans. Aging cell, 13(2), pp.206–215.	NEGATIVE
Amiloride hydrochloride	Clc1nc(C(=O)N=C(N)N)c(nc1N)N	Ye, X. et al., 2014. A pharmacological network for lifespan extension in Caenorhabditis elegans. Aging cell, 13(2), pp.206–215.	NEGATIVE
5-(N,N-hexamethylene)amiloride	Clc1nc(C(=O)N=C(N)N)c(nc1N1CCCCCC1)N	Ye, X. et al., 2014. A pharmacological network for lifespan extension in Caenorhabditis elegans. Aging cell, 13(2), pp.206–215.	NEGATIVE
2-Chloroadenosine	Clc1nc(N)c2ncn(c2n1)[C@H]1O[C@H](CO)[C@H](O)[C@@H]1O	Ye, X. et al., 2014. A pharmacological network for lifespan extension in Caenorhabditis elegans. Aging cell, 13(2), pp.206–215.	NEGATIVE
2-Chloroadenosine triphosphate tetrasodium	Clc1nc(N)c2ncn(c2n1)[C@H]1O[C@H](COP(OP(OP(O)(O)=O)(O)=O)(O)=O)[C@H](O)[C@@H]1O	Ye, X. et al., 2014. A pharmacological network for lifespan extension in Caenorhabditis elegans. Aging cell, 13(2), pp.206–215.	NEGATIVE
SR 57227A	Clc1nc(N2CCC(N)CC2)ccc1	Ye, X. et al., 2014. A pharmacological network for lifespan extension in Caenorhabditis elegans. Aging cell, 13(2), pp.206–215.	NEGATIVE
Reactive Blue 2	Clc1nc(nc(n1)Nc1cc(S(O)(=O)=O)ccc1)Nc1ccc(Nc2c3c(c(N)c(S(O)(=O)=O)c2)C(=O)c2c(cccc2)C3=O)cc1S(O)(=O)=O	Ye, X. et al., 2014. A pharmacological network for lifespan extension in Caenorhabditis elegans. Aging cell, 13(2), pp.206–215.	NEGATIVE
Moxonidine hydrochloride	Clc1nc(nc(OC)c1NC=1NCCN=1)C	Ye, X. et al., 2014. A pharmacological network for lifespan extension in Caenorhabditis elegans. Aging cell, 13(2), pp.206–215.	NEGATIVE
CBIQ	Clc1nccc2c1ccc1c2cccc1	Ye, X. et al., 2014. A pharmacological network for lifespan extension in Caenorhabditis elegans. Aging cell, 13(2), pp.206–215.	NEGATIVE
DBO-83	Clc1nnc(N2C[C@@H]3N[C@H](CC3)C2)cc1	Ye, X. et al., 2014. A pharmacological network for lifespan extension in Caenorhabditis elegans. Aging cell, 13(2), pp.206–215.	NEGATIVE
Z-L-Phe chloromethyl ketone	ClCC(=O)[C@H](NC(OCc1ccccc1)=O)Cc1ccccc1	Ye, X. et al., 2014. A pharmacological network for lifespan extension in Caenorhabditis elegans. Aging cell, 13(2), pp.206–215.	NEGATIVE
N-p-Tosyl-L-phenylalanine chloromethyl ketone	ClCC(=O)[C@H](NS(=O)(=O)c1ccc(cc1)C)Cc1ccccc1	Ye, X. et al., 2014. A pharmacological network for lifespan extension in Caenorhabditis elegans. Aging cell, 13(2), pp.206–215.	NEGATIVE
Na-p-Tosyl-L-lysine chloromethyl ketone hydrochloride	ClCC(=O)[C@H](NS(=O)(=O)c1ccc(cc1)C)CCCCN	Ye, X. et al., 2014. A pharmacological network for lifespan extension in Caenorhabditis elegans. Aging cell, 13(2), pp.206–215.	NEGATIVE
Phenoxybenzamine hydrochloride	ClCCN([C@@H](COc1ccccc1)C)Cc1ccccc1	Ye, X. et al., 2014. A pharmacological network for lifespan extension in Caenorhabditis elegans. Aging cell, 13(2), pp.206–215.	NEGATIVE
Melphalan	ClCCN(CCCl)c1ccc(cc1)C[C@@H](N)C(O)=O	Ye, X. et al., 2014. A pharmacological network for lifespan extension in Caenorhabditis elegans. Aging cell, 13(2), pp.206–215.	NEGATIVE
Chlorambucil	ClCCN(CCCl)c1ccc(cc1)CCCC(O)=O	Ye, X. et al., 2014. A pharmacological network for lifespan extension in Caenorhabditis elegans. Aging cell, 13(2), pp.206–215.	NEGATIVE
Acetylcholine mustard hydrochloride	ClCCN(CCOC(=O)C)C	Ye, X. et al., 2014. A pharmacological network for lifespan extension in Caenorhabditis elegans. Aging cell, 13(2), pp.206–215.	NEGATIVE
Nimustine hydrochloride	ClCCN(N=O)C(=O)NCc1cnc(nc1N)C	Ye, X. et al., 2014. A pharmacological network for lifespan extension in Caenorhabditis elegans. Aging cell, 13(2), pp.206–215.	NEGATIVE
Carmustine	ClCCN(N=O)C(=O)NCCCl	Ye, X. et al., 2014. A pharmacological network for lifespan extension in Caenorhabditis elegans. Aging cell, 13(2), pp.206–215.	NEGATIVE
Cyclophosphamide monohydrate	ClCCN(P1(OCCCN1)=O)CCCl	Ye, X. et al., 2014. A pharmacological network for lifespan extension in Caenorhabditis elegans. Aging cell, 13(2), pp.206–215.	NEGATIVE
4-Diphenylacetoxy-N-(2-chloroethyl)piperidine hydrochloride	ClCCN1CCC(OC(=O)C(c2ccccc2)c2ccccc2)CC1	Ye, X. et al., 2014. A pharmacological network for lifespan extension in Caenorhabditis elegans. Aging cell, 13(2), pp.206–215.	NEGATIVE
2,4-Dinitrophenyl 2-fluoro-2-deoxy-beta-D-glucopyranoside	F[C@H]1[C@@H](O)[C@@H](O)[C@H](O[C@@H]1Oc1ccc([N+](=O)[O-])cc1[N+](=O)[O-])CO	Ye, X. et al., 2014. A pharmacological network for lifespan extension in Caenorhabditis elegans. Aging cell, 13(2), pp.206–215.	NEGATIVE
L-733,060 hydrochloride	FC(F)(F)c1cc(cc(c1)C(F)(F)F)CO[C@@H]1CCCN[C@@H]1c1ccccc1	Ye, X. et al., 2014. A pharmacological network for lifespan extension in Caenorhabditis elegans. Aging cell, 13(2), pp.206–215.	NEGATIVE
L-732,138	FC(F)(F)c1cc(cc(c1)C(F)(F)F)COC(=O)[C@H](NC(=O)C)Cc1c2c([nH]c1)cccc2	Ye, X. et al., 2014. A pharmacological network for lifespan extension in Caenorhabditis elegans. Aging cell, 13(2), pp.206–215.	NEGATIVE
Nilutamide	FC(F)(F)c1cc(N2C(=O)C(NC2=O)(C)C)ccc1[N+](=O)[O-]	Ye, X. et al., 2014. A pharmacological network for lifespan extension in Caenorhabditis elegans. Aging cell, 13(2), pp.206–215.	NEGATIVE
NS-1619	FC(F)(F)c1cc(N2c3c(NC2=O)cc(cc3)C(F)(F)F)c(O)cc1	Ye, X. et al., 2014. A pharmacological network for lifespan extension in Caenorhabditis elegans. Aging cell, 13(2), pp.206–215.	NEGATIVE
Flutamide	FC(F)(F)c1cc(NC(=O)C(C)C)ccc1[N+](=O)[O-]	Ye, X. et al., 2014. A pharmacological network for lifespan extension in Caenorhabditis elegans. Aging cell, 13(2), pp.206–215.	NEGATIVE
Niflumic acid	FC(F)(F)c1cc(Nc2ncccc2C(O)=O)ccc1	Ye, X. et al., 2014. A pharmacological network for lifespan extension in Caenorhabditis elegans. Aging cell, 13(2), pp.206–215.	NEGATIVE
CGS-12066A maleate	FC(F)(F)c1cc2N=C(N3CCN(CC3)C)c3n(-c2cc1)ccc3	Ye, X. et al., 2014. A pharmacological network for lifespan extension in Caenorhabditis elegans. Aging cell, 13(2), pp.206–215.	NEGATIVE
Fluvoxamine maleate	FC(F)(F)c1ccc(cc1)/C(=N/OCCN)/CCCCOC	Ye, X. et al., 2014. A pharmacological network for lifespan extension in Caenorhabditis elegans. Aging cell, 13(2), pp.206–215.	NEGATIVE
3-Methyl-6-(3-[trifluoromethyl]phenyl)-1,2,4-triazolo[4,3-b]pyridazine	FC(F)(F)c1ccc(cc1)C=1C=Nn2c(nnc2C)C=1	Ye, X. et al., 2014. A pharmacological network for lifespan extension in Caenorhabditis elegans. Aging cell, 13(2), pp.206–215.	NEGATIVE
Leflunomide	FC(F)(F)c1ccc(NC(=O)c2cnoc2C)cc1	Ye, X. et al., 2014. A pharmacological network for lifespan extension in Caenorhabditis elegans. Aging cell, 13(2), pp.206–215.	NEGATIVE
Org 24598 lithium salt	FC(F)(F)c1ccc(O[C@H](CCN(CC(O)=O)C)c2ccccc2)cc1	Ye, X. et al., 2014. A pharmacological network for lifespan extension in Caenorhabditis elegans. Aging cell, 13(2), pp.206–215.	NEGATIVE
Fluoxetine hydrochloride	FC(F)(F)c1ccc(O[C@H](CCNC)c2ccccc2)cc1	Ye, X. et al., 2014. A pharmacological network for lifespan extension in Caenorhabditis elegans. Aging cell, 13(2), pp.206–215.	NEGATIVE
1-[2-(Trifluoromethyl)phenyl]imidazole	FC(F)(F)c1ccccc1-n1ccnc1	Ye, X. et al., 2014. A pharmacological network for lifespan extension in Caenorhabditis elegans. Aging cell, 13(2), pp.206–215.	NEGATIVE
(±)-Bay K 8644	FC(F)(F)c1ccccc1[C@@H]1C(C(OC)=O)=C(NC(C)=C1[N+](=O)[O-])C	Ye, X. et al., 2014. A pharmacological network for lifespan extension in Caenorhabditis elegans. Aging cell, 13(2), pp.206–215.	NEGATIVE
CGP 20712A methanesulfonate	FC(F)(F)c1nc(n(c1)C)-c1ccc(OC[C@@H](O)CNCCOc2cc(C(=O)N)c(O)cc2)cc1	Ye, X. et al., 2014. A pharmacological network for lifespan extension in Caenorhabditis elegans. Aging cell, 13(2), pp.206–215.	NEGATIVE
Flecainide acetate	FC(F)(F)COc1ccc(OCC(F)(F)F)cc1C(=O)NC[C@@H]1NCCCC1	Ye, X. et al., 2014. A pharmacological network for lifespan extension in Caenorhabditis elegans. Aging cell, 13(2), pp.206–215.	NEGATIVE
DL-alpha-Difluoromethylornithine hydrochloride	FC(F)C(N)(CCCN)C(O)=O	Ye, X. et al., 2014. A pharmacological network for lifespan extension in Caenorhabditis elegans. Aging cell, 13(2), pp.206–215.	NEGATIVE
Zardaverine	FC(F)Oc1ccc(cc1OC)C1=NNC(=O)C=C1	Ye, X. et al., 2014. A pharmacological network for lifespan extension in Caenorhabditis elegans. Aging cell, 13(2), pp.206–215.	NEGATIVE
5-fluoro-5'-deoxyuridine	FC1=CN([C@H]2O[C@H](C)[C@@H](O)[C@H]2O)C(=O)NC1=O	Ye, X. et al., 2014. A pharmacological network for lifespan extension in Caenorhabditis elegans. Aging cell, 13(2), pp.206–215.	NEGATIVE
5-Fluorouracil	FC1=CNC(=O)NC1=O	Ye, X. et al., 2014. A pharmacological network for lifespan extension in Caenorhabditis elegans. Aging cell, 13(2), pp.206–215.	NEGATIVE
Triamcinolone	FC12[C@H]([C@@H]3C[C@@H](O)C(O)(C(=O)CO)C3(C[C@H]1O)C)CCC1=CC(=O)C=CC12C	Ye, X. et al., 2014. A pharmacological network for lifespan extension in Caenorhabditis elegans. Aging cell, 13(2), pp.206–215.	NEGATIVE
Betamethasone	FC12[C@H]([C@H]3C[C@@H](C)C(O)(C(=O)CO)C3(C[C@@H]1O)C)CCC1=CC(=O)C=CC12C	Ye, X. et al., 2014. A pharmacological network for lifespan extension in Caenorhabditis elegans. Aging cell, 13(2), pp.206–215.	NEGATIVE
S(-)-UH-301 hydrochloride	Fc1c2c(C[C@@H](N(CCC)CCC)CC2)c(O)cc1	Ye, X. et al., 2014. A pharmacological network for lifespan extension in Caenorhabditis elegans. Aging cell, 13(2), pp.206–215.	NEGATIVE
Lomefloxacin hydrochloride	Fc1c2N(C=C(C(O)=O)C(=O)c2cc(F)c1N1C[C@@H](NCC1)C)CC	Ye, X. et al., 2014. A pharmacological network for lifespan extension in Caenorhabditis elegans. Aging cell, 13(2), pp.206–215.	NEGATIVE
NNC 55-0396	Fc1cc(c2CC(OC(=O)C3CC3)(CCc2c1)CCN(CCCc1[nH]c2c(n1)cccc2)C)C(C)C	Ye, X. et al., 2014. A pharmacological network for lifespan extension in Caenorhabditis elegans. Aging cell, 13(2), pp.206–215.	NEGATIVE
SB 228357	Fc1cc(cc(NC(=O)N2CCc3cc(OC)c(cc23)C(F)(F)F)c1)-c1cccnc1	Ye, X. et al., 2014. A pharmacological network for lifespan extension in Caenorhabditis elegans. Aging cell, 13(2), pp.206–215.	NEGATIVE
DFB	Fc1cc(ccc1)\C=N\N=C\c1cc(F)ccc1	Ye, X. et al., 2014. A pharmacological network for lifespan extension in Caenorhabditis elegans. Aging cell, 13(2), pp.206–215.	NEGATIVE
6-Fluoronorepinephrine hydrochloride	Fc1cc(O)c(O)cc1[C@@H](O)CN	Ye, X. et al., 2014. A pharmacological network for lifespan extension in Caenorhabditis elegans. Aging cell, 13(2), pp.206–215.	NEGATIVE
Flumazenil	Fc1cc2c(-n3c(CN(C)C2=O)c(nc3)C(OCC)=O)cc1	Ye, X. et al., 2014. A pharmacological network for lifespan extension in Caenorhabditis elegans. Aging cell, 13(2), pp.206–215.	NEGATIVE
Mibefradil dihydrochloride	Fc1cc2c(cc1)[C@@H](C(C)C)C(OC(=O)COC)(CC2)CCN(CCCc1[nH]c2c(n1)cccc2)C	Ye, X. et al., 2014. A pharmacological network for lifespan extension in Caenorhabditis elegans. Aging cell, 13(2), pp.206–215.	NEGATIVE
Ofloxacin	Fc1cc2c3N(C=C(C(O)=O)C2=O)[C@@H](COc3c1N1CCN(CC1)C)C	Ye, X. et al., 2014. A pharmacological network for lifespan extension in Caenorhabditis elegans. Aging cell, 13(2), pp.206–215.	NEGATIVE
5-Fluoroindole-2-carboxylic acid	Fc1cc2cc([nH]c2cc1)C(O)=O	Ye, X. et al., 2014. A pharmacological network for lifespan extension in Caenorhabditis elegans. Aging cell, 13(2), pp.206–215.	NEGATIVE
Risperidone	Fc1cc2onc(c2cc1)C1CCN(CC1)CCC=1C(=O)N2C(=NC=1C)CCCC2	Ye, X. et al., 2014. A pharmacological network for lifespan extension in Caenorhabditis elegans. Aging cell, 13(2), pp.206–215.	NEGATIVE
N,N-Dihexyl-2-(4-fluorophenyl)indole-3-acetamide	Fc1ccc(cc1)-c1[nH]c2c(cccc2)c1CC(=O)N(CCCCCC)CCCCCC	Ye, X. et al., 2014. A pharmacological network for lifespan extension in Caenorhabditis elegans. Aging cell, 13(2), pp.206–215.	NEGATIVE
PD 169316	Fc1ccc(cc1)-c1nc([nH]c1-c1ccncc1)-c1ccc([N+](=O)[O-])cc1	Ye, X. et al., 2014. A pharmacological network for lifespan extension in Caenorhabditis elegans. Aging cell, 13(2), pp.206–215.	NEGATIVE
Paroxetine hydrochloride hemihydrate	Fc1ccc(cc1)[C@@H]1CCNC[C@H]1COc1cc2OCOc2cc1	Ye, X. et al., 2014. A pharmacological network for lifespan extension in Caenorhabditis elegans. Aging cell, 13(2), pp.206–215.	NEGATIVE
Pirenperone	Fc1ccc(cc1)C(=O)C1CCN(CC1)CCC=1C(=O)N2C(=NC=1C)C=CC=C2	Ye, X. et al., 2014. A pharmacological network for lifespan extension in Caenorhabditis elegans. Aging cell, 13(2), pp.206–215.	NEGATIVE
LY-310,762 hydrochloride	Fc1ccc(cc1)C(=O)C1CCN(CC1)CCN1c2c(cccc2)C(C)(C)C1=O	Ye, X. et al., 2014. A pharmacological network for lifespan extension in Caenorhabditis elegans. Aging cell, 13(2), pp.206–215.	NEGATIVE
Droperidol	Fc1ccc(cc1)C(=O)CCCN1CCC(N2c3c(NC2=O)cccc3)=CC1	Ye, X. et al., 2014. A pharmacological network for lifespan extension in Caenorhabditis elegans. Aging cell, 13(2), pp.206–215.	NEGATIVE
Trifluperidol hydrochloride	Fc1ccc(cc1)C(=O)CCCN1CCC(O)(CC1)c1cc(ccc1)C(F)(F)F	Ye, X. et al., 2014. A pharmacological network for lifespan extension in Caenorhabditis elegans. Aging cell, 13(2), pp.206–215.	NEGATIVE
Spiperone hydrochloride	Fc1ccc(cc1)C(=O)CCCN1CCC2(N(CNC2=O)c2ccccc2)CC1	Ye, X. et al., 2014. A pharmacological network for lifespan extension in Caenorhabditis elegans. Aging cell, 13(2), pp.206–215.	NEGATIVE
p-MPPF dihydrochloride	Fc1ccc(cc1)C(=O)N(CCN1CCN(CC1)c1ccccc1OC)c1ncccc1	Ye, X. et al., 2014. A pharmacological network for lifespan extension in Caenorhabditis elegans. Aging cell, 13(2), pp.206–215.	NEGATIVE
Pimozide	Fc1ccc(cc1)C(CCCN1CCC(N2c3c(NC2=O)cccc3)CC1)c1ccc(F)cc1	Ye, X. et al., 2014. A pharmacological network for lifespan extension in Caenorhabditis elegans. Aging cell, 13(2), pp.206–215.	NEGATIVE
Fluspirilene	Fc1ccc(cc1)C(CCCN1CCC2(N(CNC2=O)c2ccccc2)CC1)c1ccc(F)cc1	Ye, X. et al., 2014. A pharmacological network for lifespan extension in Caenorhabditis elegans. Aging cell, 13(2), pp.206–215.	NEGATIVE
Flunarizine dihydrochloride	Fc1ccc(cc1)C(N1CCN(CC1)C\C=C\c1ccccc1)c1ccc(F)cc1	Ye, X. et al., 2014. A pharmacological network for lifespan extension in Caenorhabditis elegans. Aging cell, 13(2), pp.206–215.	NEGATIVE
JHW 007 hydrochloride	Fc1ccc(cc1)C(OC1C[C@@H]2N([C@@H](C1)CC2)CCCC)c1ccc(F)cc1	Ye, X. et al., 2014. A pharmacological network for lifespan extension in Caenorhabditis elegans. Aging cell, 13(2), pp.206–215.	NEGATIVE
3-(1H-Imidazol-4-yl)propyl di(p-fluorophenyl)methyl ether hydrochloride	Fc1ccc(cc1)C(OCCCc1[nH]cnc1)c1ccc(F)cc1	Ye, X. et al., 2014. A pharmacological network for lifespan extension in Caenorhabditis elegans. Aging cell, 13(2), pp.206–215.	NEGATIVE
GBR-12909 dihydrochloride	Fc1ccc(cc1)C(OCCN1CCN(CC1)CCCc1ccccc1)c1ccc(F)cc1	Ye, X. et al., 2014. A pharmacological network for lifespan extension in Caenorhabditis elegans. Aging cell, 13(2), pp.206–215.	NEGATIVE
p-Fluoro-L-phenylalanine	Fc1ccc(cc1)C[C@@H](N)C(O)=O	Ye, X. et al., 2014. A pharmacological network for lifespan extension in Caenorhabditis elegans. Aging cell, 13(2), pp.206–215.	NEGATIVE
Ro 8-4304	Fc1ccc(cc1)C=1CCN(CC=1)C[C@@H](O)COc1ccc(cc1)C(=O)N	Ye, X. et al., 2014. A pharmacological network for lifespan extension in Caenorhabditis elegans. Aging cell, 13(2), pp.206–215.	NEGATIVE
SB 202190	Fc1ccc(cc1)C=1NC(NC=1c1ccncc1)=C1C=CC(=O)C=C1	Ye, X. et al., 2014. A pharmacological network for lifespan extension in Caenorhabditis elegans. Aging cell, 13(2), pp.206–215.	NEGATIVE
Citalopram hydrobromide	Fc1ccc(cc1)C1(OCc2c1ccc(c2)C#N)CCCN(C)C	Ye, X. et al., 2014. A pharmacological network for lifespan extension in Caenorhabditis elegans. Aging cell, 13(2), pp.206–215.	NEGATIVE
1-(4-Fluorobenzyl)-5-methoxy-2-methylindole-3-acetic acid	Fc1ccc(cc1)Cn1c2c(cc(OC)cc2)c(CC(O)=O)c1C	Ye, X. et al., 2014. A pharmacological network for lifespan extension in Caenorhabditis elegans. Aging cell, 13(2), pp.206–215.	NEGATIVE
Flupirtine maleate	Fc1ccc(cc1)CNc1nc(N)c(NC(OCC)=O)cc1	Ye, X. et al., 2014. A pharmacological network for lifespan extension in Caenorhabditis elegans. Aging cell, 13(2), pp.206–215.	NEGATIVE
CGP 57380	Fc1ccc(Nc2[nH]nc3ncnc(N)c23)cc1	Ye, X. et al., 2014. A pharmacological network for lifespan extension in Caenorhabditis elegans. Aging cell, 13(2), pp.206–215.	NEGATIVE
BWB70C	Fc1ccc(Oc2cc(ccc2)\C=C\[C@H](N(O)C(=O)N)C)cc1	Ye, X. et al., 2014. A pharmacological network for lifespan extension in Caenorhabditis elegans. Aging cell, 13(2), pp.206–215.	NEGATIVE
Ro 41-0960	Fc1ccccc1C(=O)c1cc([N+](=O)[O-])c(O)c(O)c1	Ye, X. et al., 2014. A pharmacological network for lifespan extension in Caenorhabditis elegans. Aging cell, 13(2), pp.206–215.	NEGATIVE
ML-7	Ic1c2c(ccc1)c(S(=O)(=O)N1CCCNCC1)ccc2	Ye, X. et al., 2014. A pharmacological network for lifespan extension in Caenorhabditis elegans. Aging cell, 13(2), pp.206–215.	NEGATIVE
Amiodarone hydrochloride	Ic1cc(cc(I)c1OCCN(CC)CC)C(=O)c1c2c(oc1CCCC)cccc2	Ye, X. et al., 2014. A pharmacological network for lifespan extension in Caenorhabditis elegans. Aging cell, 13(2), pp.206–215.	NEGATIVE
I-OMe-Tyrphostin AG 538	Ic1cc(cc(OC)c1O)\C=C(\C(=O)c1cc(O)c(O)cc1)/C#N	Ye, X. et al., 2014. A pharmacological network for lifespan extension in Caenorhabditis elegans. Aging cell, 13(2), pp.206–215.	NEGATIVE
M-Iodobenzylguanidine hemisulfate	Ic1cc(ccc1)CN=C(N)N	Ye, X. et al., 2014. A pharmacological network for lifespan extension in Caenorhabditis elegans. Aging cell, 13(2), pp.206–215.	NEGATIVE
Chloro-IB-MECA	Ic1cc(ccc1)CNc1nc(Cl)nc2n(cnc12)[C@H]1O[C@H](C(=O)NC)[C@@H](O)[C@H]1O	Ye, X. et al., 2014. A pharmacological network for lifespan extension in Caenorhabditis elegans. Aging cell, 13(2), pp.206–215.	NEGATIVE
IB-MECA	Ic1cc(ccc1)CNc1ncnc2n(cnc12)[C@H]1O[C@H](C(=O)NC)[C@@H](O)[C@H]1O	Ye, X. et al., 2014. A pharmacological network for lifespan extension in Caenorhabditis elegans. Aging cell, 13(2), pp.206–215.	NEGATIVE
3-Iodo-L-tyrosine	Ic1cc(ccc1O)C[C@@H](N)C(O)=O	Ye, X. et al., 2014. A pharmacological network for lifespan extension in Caenorhabditis elegans. Aging cell, 13(2), pp.206–215.	NEGATIVE
p-Iodoclonidine hydrochloride	Ic1cc(Cl)c(NC=2NCCN=2)c(Cl)c1	Ye, X. et al., 2014. A pharmacological network for lifespan extension in Caenorhabditis elegans. Aging cell, 13(2), pp.206–215.	NEGATIVE
(±)-DOI hydrochloride	Ic1cc(OC)c(cc1OC)C[C@H](N)C	Ye, X. et al., 2014. A pharmacological network for lifespan extension in Caenorhabditis elegans. Aging cell, 13(2), pp.206–215.	NEGATIVE
GW5074	Ic1cc\2c(NC(=O)/C/2=C\c2cc(Br)c(O)c(Br)c2)cc1	Ye, X. et al., 2014. A pharmacological network for lifespan extension in Caenorhabditis elegans. Aging cell, 13(2), pp.206–215.	NEGATIVE
Iofetamine hydrochloride	Ic1ccc(cc1)C[C@H](NC(C)C)C	Ye, X. et al., 2014. A pharmacological network for lifespan extension in Caenorhabditis elegans. Aging cell, 13(2), pp.206–215.	NEGATIVE
L-750,667 trihydrochloride	Ic1ccc(N2CCN(CC2)Cc2c3cccnc3[nH]c2)cc1	Ye, X. et al., 2014. A pharmacological network for lifespan extension in Caenorhabditis elegans. Aging cell, 13(2), pp.206–215.	NEGATIVE
L-703,606 oxalate	Ic1ccccc1CN[C@@H]1C2CCN(CC2)[C@H]1C(c1ccccc1)c1ccccc1	Ye, X. et al., 2014. A pharmacological network for lifespan extension in Caenorhabditis elegans. Aging cell, 13(2), pp.206–215.	NEGATIVE
Iodoacetamide	ICC(=O)N	Ye, X. et al., 2014. A pharmacological network for lifespan extension in Caenorhabditis elegans. Aging cell, 13(2), pp.206–215.	NEGATIVE
R-(-)-Desmethyldeprenyl hydrochloride	N([C@@H](Cc1ccccc1)C)CC#C	Ye, X. et al., 2014. A pharmacological network for lifespan extension in Caenorhabditis elegans. Aging cell, 13(2), pp.206–215.	NEGATIVE
CNS-1102	N(=C(\N(C)c1cc(ccc1)CC)/N)/c1c2c(ccc1)cccc2	Ye, X. et al., 2014. A pharmacological network for lifespan extension in Caenorhabditis elegans. Aging cell, 13(2), pp.206–215.	NEGATIVE
1400W dihydrochloride	N(=C(\N)/C)/Cc1cc(ccc1)CN	Ye, X. et al., 2014. A pharmacological network for lifespan extension in Caenorhabditis elegans. Aging cell, 13(2), pp.206–215.	NEGATIVE
1-Phenylbiguanide	N(=C(\N=C(N)N)/N)/c1ccccc1	Ye, X. et al., 2014. A pharmacological network for lifespan extension in Caenorhabditis elegans. Aging cell, 13(2), pp.206–215.	NEGATIVE
Mecamylamine hydrochloride	N(C)C1([C@@H]2CC[C@H](C2)C1(C)C)C	Ye, X. et al., 2014. A pharmacological network for lifespan extension in Caenorhabditis elegans. Aging cell, 13(2), pp.206–215.	NEGATIVE
Pargyline hydrochloride	N(Cc1ccccc1)(CC#C)C	Ye, X. et al., 2014. A pharmacological network for lifespan extension in Caenorhabditis elegans. Aging cell, 13(2), pp.206–215.	NEGATIVE
Cyclobenzaprine hydrochloride	N(CCC=C1c2c(C=Cc3c1cccc3)cccc2)(C)C	Ye, X. et al., 2014. A pharmacological network for lifespan extension in Caenorhabditis elegans. Aging cell, 13(2), pp.206–215.	NEGATIVE
Amitriptyline hydrochloride	N(CCC=C1c2c(CCc3c1cccc3)cccc2)(C)C	Ye, X. et al., 2014. A pharmacological network for lifespan extension in Caenorhabditis elegans. Aging cell, 13(2), pp.206–215.	NEGATIVE
IEM-1460	N(CCC1C[C@@H]2CCC[C@@H](C1)C2)CCCCCNC	Ye, X. et al., 2014. A pharmacological network for lifespan extension in Caenorhabditis elegans. Aging cell, 13(2), pp.206–215.	NEGATIVE
Protriptyline hydrochloride	N(CCCC1c2c(C=Cc3c1cccc3)cccc2)C	Ye, X. et al., 2014. A pharmacological network for lifespan extension in Caenorhabditis elegans. Aging cell, 13(2), pp.206–215.	NEGATIVE
Arcaine sulfate	N(CCCCN=C(N)N)=C(N)N	Ye, X. et al., 2014. A pharmacological network for lifespan extension in Caenorhabditis elegans. Aging cell, 13(2), pp.206–215.	NEGATIVE
Spermine tetrahydrochloride	N(CCCCNCCCN)CCCN	Ye, X. et al., 2014. A pharmacological network for lifespan extension in Caenorhabditis elegans. Aging cell, 13(2), pp.206–215.	NEGATIVE
Imipramine hydrochloride	N(CCCN1c2c(CCc3c1cccc3)cccc2)(C)C	Ye, X. et al., 2014. A pharmacological network for lifespan extension in Caenorhabditis elegans. Aging cell, 13(2), pp.206–215.	NEGATIVE
Desipramine hydrochloride	N(CCCN1c2c(CCc3c1cccc3)cccc2)C	Ye, X. et al., 2014. A pharmacological network for lifespan extension in Caenorhabditis elegans. Aging cell, 13(2), pp.206–215.	NEGATIVE
Phenelzine sulfate	N(N)CCc1ccccc1	Ye, X. et al., 2014. A pharmacological network for lifespan extension in Caenorhabditis elegans. Aging cell, 13(2), pp.206–215.	NEGATIVE
S(-)-DS 121 hydrochloride	N#Cc1cc(ccc1)[C@@H]1CCCN(C1)CCC	Ye, X. et al., 2014. A pharmacological network for lifespan extension in Caenorhabditis elegans. Aging cell, 13(2), pp.206–215.	NEGATIVE
L-687,384 hydrochloride	N1(CCC2(CCCc3c2cccc3)CC1)Cc1ccccc1	Ye, X. et al., 2014. A pharmacological network for lifespan extension in Caenorhabditis elegans. Aging cell, 13(2), pp.206–215.	NEGATIVE
MDL 26,630 trihydrochloride	N1[C@@H](CCC[C@@H]1CCN)CCN	Ye, X. et al., 2014. A pharmacological network for lifespan extension in Caenorhabditis elegans. Aging cell, 13(2), pp.206–215.	NEGATIVE
(+)-MK-801 hydrogen maleate	N1[C@@H]2Cc3c(cccc3)[C@]1(c1c2cccc1)C	Ye, X. et al., 2014. A pharmacological network for lifespan extension in Caenorhabditis elegans. Aging cell, 13(2), pp.206–215.	NEGATIVE
(-)-MK-801 hydrogen maleate	N1[C@H]2Cc3c(cccc3)C1(c1c2cccc1)C	Ye, X. et al., 2014. A pharmacological network for lifespan extension in Caenorhabditis elegans. Aging cell, 13(2), pp.206–215.	NEGATIVE
Pentylenetetrazole	n12nnnc1CCCCC2	Ye, X. et al., 2014. A pharmacological network for lifespan extension in Caenorhabditis elegans. Aging cell, 13(2), pp.206–215.	NEGATIVE
SIB 1893	n1c(cccc1\C=C\c1ccccc1)C	Ye, X. et al., 2014. A pharmacological network for lifespan extension in Caenorhabditis elegans. Aging cell, 13(2), pp.206–215.	NEGATIVE
6-Methyl-2-(phenylethynyl)pyridine hydrochloride	n1c(cccc1C)C#Cc1ccccc1	Ye, X. et al., 2014. A pharmacological network for lifespan extension in Caenorhabditis elegans. Aging cell, 13(2), pp.206–215.	NEGATIVE
Triamterene	n1c(N)c2nc(-c3ccccc3)c(nc2nc1N)N	Ye, X. et al., 2014. A pharmacological network for lifespan extension in Caenorhabditis elegans. Aging cell, 13(2), pp.206–215.	NEGATIVE
Altretamine	n1c(nc(nc1N(C)C)N(C)C)N(C)C	Ye, X. et al., 2014. A pharmacological network for lifespan extension in Caenorhabditis elegans. Aging cell, 13(2), pp.206–215.	NEGATIVE
Quinelorane dihydrochloride	n1c2c(C[C@@H]3N(CCC[C@H]3C2)CCC)cnc1N	Ye, X. et al., 2014. A pharmacological network for lifespan extension in Caenorhabditis elegans. Aging cell, 13(2), pp.206–215.	NEGATIVE
Imiquimod	n1c2c(c3n(cnc3c1N)CC(C)C)cccc2	Ye, X. et al., 2014. A pharmacological network for lifespan extension in Caenorhabditis elegans. Aging cell, 13(2), pp.206–215.	NEGATIVE
BF-170 hydrochloride	n1c2c(ccc1-c1ccc(N)cc1)cccc2	Ye, X. et al., 2014. A pharmacological network for lifespan extension in Caenorhabditis elegans. Aging cell, 13(2), pp.206–215.	NEGATIVE
BU224 hydrochloride	n1c2c(ccc1C=1NCCN=1)cccc2	Ye, X. et al., 2014. A pharmacological network for lifespan extension in Caenorhabditis elegans. Aging cell, 13(2), pp.206–215.	NEGATIVE
Quipazine dimaleate	n1c2c(ccc1N1CCNCC1)cccc2	Ye, X. et al., 2014. A pharmacological network for lifespan extension in Caenorhabditis elegans. Aging cell, 13(2), pp.206–215.	NEGATIVE
1,10-Phenanthroline monohydrate	n1c2c(ccc3c2nccc3)ccc1	Ye, X. et al., 2014. A pharmacological network for lifespan extension in Caenorhabditis elegans. Aging cell, 13(2), pp.206–215.	NEGATIVE
JL-18	n1c2Nc3c(cc(cc3)C)C(=Nc2ccc1)N1CCN(CC1)C	Ye, X. et al., 2014. A pharmacological network for lifespan extension in Caenorhabditis elegans. Aging cell, 13(2), pp.206–215.	NEGATIVE
(-)-Nicotine hydrogen tartrate salt	n1cc(ccc1)[C@@H]1N(CCC1)C	Ye, X. et al., 2014. A pharmacological network for lifespan extension in Caenorhabditis elegans. Aging cell, 13(2), pp.206–215.	NEGATIVE
GW2974	n1cc2ncnc(Nc3cc4c(n(nc4)Cc4ccccc4)cc3)c2cc1N(C)C	Ye, X. et al., 2014. A pharmacological network for lifespan extension in Caenorhabditis elegans. Aging cell, 13(2), pp.206–215.	NEGATIVE
4-Aminopyridine	n1ccc(N)cc1	Ye, X. et al., 2014. A pharmacological network for lifespan extension in Caenorhabditis elegans. Aging cell, 13(2), pp.206–215.	NEGATIVE
Pinacidil	n1ccc(N\C(=N/[C@@H](C(C)(C)C)C)\NC#N)cc1	Ye, X. et al., 2014. A pharmacological network for lifespan extension in Caenorhabditis elegans. Aging cell, 13(2), pp.206–215.	NEGATIVE
2,2'-Bipyridyl	n1ccccc1-c1ncccc1	Ye, X. et al., 2014. A pharmacological network for lifespan extension in Caenorhabditis elegans. Aging cell, 13(2), pp.206–215.	NEGATIVE
Pheniramine maleate	n1ccccc1[C@H](CCN(C)C)c1ccccc1	Ye, X. et al., 2014. A pharmacological network for lifespan extension in Caenorhabditis elegans. Aging cell, 13(2), pp.206–215.	NEGATIVE
Triprolidine hydrochloride	n1ccccc1/C(=C\CN1CCCC1)/c1ccc(cc1)C	Ye, X. et al., 2014. A pharmacological network for lifespan extension in Caenorhabditis elegans. Aging cell, 13(2), pp.206–215.	NEGATIVE
1-Methylimidazole	n1ccn(c1)C	Ye, X. et al., 2014. A pharmacological network for lifespan extension in Caenorhabditis elegans. Aging cell, 13(2), pp.206–215.	NEGATIVE
1-(1-Naphthyl)piperazine hydrochloride	N1CCN(CC1)c1c2c(ccc1)cccc2	Ye, X. et al., 2014. A pharmacological network for lifespan extension in Caenorhabditis elegans. Aging cell, 13(2), pp.206–215.	NEGATIVE
Cibenzoline succinate	N1CCN=C1[C@@H]1CC1(c1ccccc1)c1ccccc1	Ye, X. et al., 2014. A pharmacological network for lifespan extension in Caenorhabditis elegans. Aging cell, 13(2), pp.206–215.	NEGATIVE
Tetrahydrozoline hydrochloride	N1CCN=C1[C@@H]1CCCc2c1cccc2	Ye, X. et al., 2014. A pharmacological network for lifespan extension in Caenorhabditis elegans. Aging cell, 13(2), pp.206–215.	NEGATIVE
Metrazoline oxalate	N1CCN=C1\C=C\c1ccccc1C	Ye, X. et al., 2014. A pharmacological network for lifespan extension in Caenorhabditis elegans. Aging cell, 13(2), pp.206–215.	NEGATIVE
Xylometazoline hydrochloride	N1CCN=C1Cc1c(cc(cc1C)C(C)(C)C)C	Ye, X. et al., 2014. A pharmacological network for lifespan extension in Caenorhabditis elegans. Aging cell, 13(2), pp.206–215.	NEGATIVE
Naphazoline hydrochloride	N1CCN=C1Cc1c2c(ccc1)cccc2	Ye, X. et al., 2014. A pharmacological network for lifespan extension in Caenorhabditis elegans. Aging cell, 13(2), pp.206–215.	NEGATIVE
1-Methylhistamine dihydrochloride	n1cn(cc1CCN)C	Ye, X. et al., 2014. A pharmacological network for lifespan extension in Caenorhabditis elegans. Aging cell, 13(2), pp.206–215.	NEGATIVE
9-cyclopentyladenine	n1cnc2n(cnc2c1N)C1CCCC1	Ye, X. et al., 2014. A pharmacological network for lifespan extension in Caenorhabditis elegans. Aging cell, 13(2), pp.206–215.	NEGATIVE
N6-Cyclopentyl-9-methyladenine	n1cnc2n(cnc2c1NC1CCCC1)C	Ye, X. et al., 2014. A pharmacological network for lifespan extension in Caenorhabditis elegans. Aging cell, 13(2), pp.206–215.	NEGATIVE
Hydralazine hydrochloride	n1ncc2c(cccc2)c1NN	Ye, X. et al., 2014. A pharmacological network for lifespan extension in Caenorhabditis elegans. Aging cell, 13(2), pp.206–215.	NEGATIVE
1-Aminobenzotriazole	n1nn(N)c2c1cccc2	Ye, X. et al., 2014. A pharmacological network for lifespan extension in Caenorhabditis elegans. Aging cell, 13(2), pp.206–215.	NEGATIVE
Benzamidine hydrochloride	NC(=N)c1ccccc1	Ye, X. et al., 2014. A pharmacological network for lifespan extension in Caenorhabditis elegans. Aging cell, 13(2), pp.206–215.	NEGATIVE
Debrisoquin sulfate	NC(=N)N1CCc2c(C1)cccc2	Ye, X. et al., 2014. A pharmacological network for lifespan extension in Caenorhabditis elegans. Aging cell, 13(2), pp.206–215.	NEGATIVE
Aminoguanidine hydrochloride	NC(N)=NN	Ye, X. et al., 2014. A pharmacological network for lifespan extension in Caenorhabditis elegans. Aging cell, 13(2), pp.206–215.	NEGATIVE
Memantine hydrochloride	NC12CC3(CC(C1)(CC(C3)C2)C)C	Ye, X. et al., 2014. A pharmacological network for lifespan extension in Caenorhabditis elegans. Aging cell, 13(2), pp.206–215.	NEGATIVE
Amantadine hydrochloride	NC12CC3CC(C1)CC(C2)C3	Ye, X. et al., 2014. A pharmacological network for lifespan extension in Caenorhabditis elegans. Aging cell, 13(2), pp.206–215.	NEGATIVE
Nomifensine maleate	Nc1c2c(ccc1)[C@@H](CN(C2)C)c1ccccc1	Ye, X. et al., 2014. A pharmacological network for lifespan extension in Caenorhabditis elegans. Aging cell, 13(2), pp.206–215.	NEGATIVE
4-Aminobenzamidine dihydrochloride	Nc1ccc(cc1)C(N)=N	Ye, X. et al., 2014. A pharmacological network for lifespan extension in Caenorhabditis elegans. Aging cell, 13(2), pp.206–215.	NEGATIVE
3-Phenylpropargylamine hydrochloride	NCC#Cc1ccccc1	Ye, X. et al., 2014. A pharmacological network for lifespan extension in Caenorhabditis elegans. Aging cell, 13(2), pp.206–215.	NEGATIVE
3-Aminopropionitrile fumarate	NCCC#N	Ye, X. et al., 2014. A pharmacological network for lifespan extension in Caenorhabditis elegans. Aging cell, 13(2), pp.206–215.	NEGATIVE
1,10-Diaminodecane	NCCCCCCCCCCN	Ye, X. et al., 2014. A pharmacological network for lifespan extension in Caenorhabditis elegans. Aging cell, 13(2), pp.206–215.	NEGATIVE
Bethanechol chloride	O([C@@H](C[N+](C)(C)C)C)C([O-])=N	Ye, X. et al., 2014. A pharmacological network for lifespan extension in Caenorhabditis elegans. Aging cell, 13(2), pp.206–215.	NEGATIVE
Acetyl-beta-methylcholine chloride	O([C@@H](C[N+](C)(C)C)C)C(=O)C	Ye, X. et al., 2014. A pharmacological network for lifespan extension in Caenorhabditis elegans. Aging cell, 13(2), pp.206–215.	NEGATIVE
Aminobenztropine	O([C@@H](c1ccccc1N)c1ccccc1)C1C[C@@H]2N([C@@H](C1)CC2)C	Ye, X. et al., 2014. A pharmacological network for lifespan extension in Caenorhabditis elegans. Aging cell, 13(2), pp.206–215.	NEGATIVE
Orphenadrine hydrochloride	O([C@H](c1ccccc1C)c1ccccc1)CCN(C)C	Ye, X. et al., 2014. A pharmacological network for lifespan extension in Caenorhabditis elegans. Aging cell, 13(2), pp.206–215.	NEGATIVE
Palmitoyl-DL-Carnitine chloride	O([C@H](CC(=O)[O-])C[N+](C)(C)C)C(=O)CCCCCCCCCCCCCCC	Ye, X. et al., 2014. A pharmacological network for lifespan extension in Caenorhabditis elegans. Aging cell, 13(2), pp.206–215.	NEGATIVE
DL-Stearoylcarnitine chloride	O([C@H](CC(=O)[O-])C[N+](C)(C)C)C(=O)CCCCCCCCCCCCCCCCC	Ye, X. et al., 2014. A pharmacological network for lifespan extension in Caenorhabditis elegans. Aging cell, 13(2), pp.206–215.	NEGATIVE
Tomoxetine	O([C@H](CCNC)c1ccccc1)c1ccccc1C	Ye, X. et al., 2014. A pharmacological network for lifespan extension in Caenorhabditis elegans. Aging cell, 13(2), pp.206–215.	NEGATIVE
Methylcarbamylcholine chloride	O(\C(\[O-])=N\C)CC[N+](C)(C)C	Ye, X. et al., 2014. A pharmacological network for lifespan extension in Caenorhabditis elegans. Aging cell, 13(2), pp.206–215.	NEGATIVE
NG-Nitro-L-arginine methyl ester hydrochloride	O(C(=O)[C@@H](N)CCC\N=C(/N[N+](=O)[O-])\N)C	Ye, X. et al., 2014. A pharmacological network for lifespan extension in Caenorhabditis elegans. Aging cell, 13(2), pp.206–215.	NEGATIVE
SB 218795	O(C(=O)[C@@H](NC(=O)c1cc(nc2c1cccc2)-c1ccccc1)c1ccccc1)C	Ye, X. et al., 2014. A pharmacological network for lifespan extension in Caenorhabditis elegans. Aging cell, 13(2), pp.206–215.	NEGATIVE
DL-Homatropine hydrobromide	O(C(=O)[C@@H](O)c1ccccc1)C1C[C@@H]2N([C@@H](C1)CC2)C	Ye, X. et al., 2014. A pharmacological network for lifespan extension in Caenorhabditis elegans. Aging cell, 13(2), pp.206–215.	NEGATIVE
Ipratropium bromide	O(C(=O)[C@H](CO)c1ccccc1)C1C[C@@H]2[N+]([C@@H](C1)CC2)(C(C)C)C	Ye, X. et al., 2014. A pharmacological network for lifespan extension in Caenorhabditis elegans. Aging cell, 13(2), pp.206–215.	NEGATIVE
Atropine methyl nitrate	O(C(=O)[C@H](CO)c1ccccc1)C1C[C@@H]2[N+]([C@@H](C1)CC2)(C)C	Ye, X. et al., 2014. A pharmacological network for lifespan extension in Caenorhabditis elegans. Aging cell, 13(2), pp.206–215.	NEGATIVE
Atropine sulfate	O(C(=O)[C@H](CO)c1ccccc1)C1C[C@@H]2N([C@@H](C1)CC2)C	Ye, X. et al., 2014. A pharmacological network for lifespan extension in Caenorhabditis elegans. Aging cell, 13(2), pp.206–215.	NEGATIVE
4-DAMP methiodide	O(C(=O)C(c1ccccc1)c1ccccc1)C1CC[N+](CC1)(C)C	Ye, X. et al., 2014. A pharmacological network for lifespan extension in Caenorhabditis elegans. Aging cell, 13(2), pp.206–215.	NEGATIVE
SKF-525A hydrochloride	O(C(=O)C(CCC)(c1ccccc1)c1ccccc1)CCN(CC)CC	Ye, X. et al., 2014. A pharmacological network for lifespan extension in Caenorhabditis elegans. Aging cell, 13(2), pp.206–215.	NEGATIVE
Oxybutynin Chloride	O(C(=O)C(O)(C1CCCCC1)c1ccccc1)CC#CCN(CC)CC	Ye, X. et al., 2014. A pharmacological network for lifespan extension in Caenorhabditis elegans. Aging cell, 13(2), pp.206–215.	NEGATIVE
Fusidic acid sodium	O(C(=O)C)[C@@H]/1CC2([C@@H](C[C@H](O)[C@@H]3C2(CC[C@H]2[C@@H](C)[C@@H](O)CCC23C)C)\C\1=C(/CCC=C(C)C)\C(O)=O)C	Ye, X. et al., 2014. A pharmacological network for lifespan extension in Caenorhabditis elegans. Aging cell, 13(2), pp.206–215.	NEGATIVE
Pancuronium bromide	O(C(=O)C)[C@H]1[C@H]([N+]2(CCCCC2)C)C[C@@H]2[C@H]3[C@@H](CCC12C)C1([C@H](C[C@@H](OC(=O)C)[C@@H]([N+]2(CCCCC2)C)C1)CC3)C	Ye, X. et al., 2014. A pharmacological network for lifespan extension in Caenorhabditis elegans. Aging cell, 13(2), pp.206–215.	NEGATIVE
Phorbol 12-myristate 13-acetate	O(C(=O)C)C12[C@@H]([C@H]3C=C(CC4(O)[C@H](C=C(C)C4=O)C3(O)[C@H](C)[C@H]1OC(=O)CCCCCCCCCCCCC)CO)C2(C)C	Ye, X. et al., 2014. A pharmacological network for lifespan extension in Caenorhabditis elegans. Aging cell, 13(2), pp.206–215.	NEGATIVE
Moxisylyte hydrochloride	O(C(=O)C)c1cc(C(C)C)c(OCCN(C)C)cc1C	Ye, X. et al., 2014. A pharmacological network for lifespan extension in Caenorhabditis elegans. Aging cell, 13(2), pp.206–215.	NEGATIVE
Nimodipine	O(C(=O)C=1[C@@H](C(C(OCCOC)=O)=C(NC=1C)C)c1cc([N+](=O)[O-])ccc1)C(C)C	Ye, X. et al., 2014. A pharmacological network for lifespan extension in Caenorhabditis elegans. Aging cell, 13(2), pp.206–215.	NEGATIVE
MRS 1845	O(C(=O)C=1[C@H](C(C(OC)=O)=C(N(CC#C)C=1C)C)c1cc([N+](=O)[O-])ccc1)CC	Ye, X. et al., 2014. A pharmacological network for lifespan extension in Caenorhabditis elegans. Aging cell, 13(2), pp.206–215.	NEGATIVE
Cilnidipine	O(C(=O)C=1[C@H](C(C(OC\C=C\c2ccccc2)=O)=C(NC=1C)C)c1cc([N+](=O)[O-])ccc1)CCOC	Ye, X. et al., 2014. A pharmacological network for lifespan extension in Caenorhabditis elegans. Aging cell, 13(2), pp.206–215.	NEGATIVE
Nifedipine	O(C(=O)C=1C(C(C(OC)=O)=C(NC=1C)C)c1ccccc1[N+](=O)[O-])C	Ye, X. et al., 2014. A pharmacological network for lifespan extension in Caenorhabditis elegans. Aging cell, 13(2), pp.206–215.	NEGATIVE
Arecoline hydrobromide	O(C(=O)C=1CN(CCC=1)C)C	Ye, X. et al., 2014. A pharmacological network for lifespan extension in Caenorhabditis elegans. Aging cell, 13(2), pp.206–215.	NEGATIVE
Arecaidine propargyl ester hydrobromide	O(C(=O)C=1CN(CCC=1)C)CC#C	Ye, X. et al., 2014. A pharmacological network for lifespan extension in Caenorhabditis elegans. Aging cell, 13(2), pp.206–215.	NEGATIVE
Carbetapentane citrate	O(C(=O)C1(CCCC1)c1ccccc1)CCOCCN(CC)CC	Ye, X. et al., 2014. A pharmacological network for lifespan extension in Caenorhabditis elegans. Aging cell, 13(2), pp.206–215.	NEGATIVE
Dicyclomine hydrochloride	O(C(=O)C1(CCCCC1)C1CCCCC1)CCN(CC)CC	Ye, X. et al., 2014. A pharmacological network for lifespan extension in Caenorhabditis elegans. Aging cell, 13(2), pp.206–215.	NEGATIVE
FPL 64176	O(C(=O)c1c(C(=O)c2ccccc2Cc2ccccc2)c([nH]c1C)C)C	Ye, X. et al., 2014. A pharmacological network for lifespan extension in Caenorhabditis elegans. Aging cell, 13(2), pp.206–215.	NEGATIVE
3-Tropanylindole-3-carboxylate methiodide	O(C(=O)c1c2c([nH]c1)cccc2)C1C[C@@H]2[N+]([C@@H](C1)CC2)(C)C	Ye, X. et al., 2014. A pharmacological network for lifespan extension in Caenorhabditis elegans. Aging cell, 13(2), pp.206–215.	NEGATIVE
3-Tropanyl-indole-3-carboxylate hydrochloride	O(C(=O)c1c2c([nH]c1)cccc2)C1C[C@@H]2N([C@@H](C1)CC2)C	Ye, X. et al., 2014. A pharmacological network for lifespan extension in Caenorhabditis elegans. Aging cell, 13(2), pp.206–215.	NEGATIVE
SB 203186	O(C(=O)c1c2c([nH]c1)cccc2)CCN1CCCCC1	Ye, X. et al., 2014. A pharmacological network for lifespan extension in Caenorhabditis elegans. Aging cell, 13(2), pp.206–215.	NEGATIVE
Procaine hydrochloride	O(C(=O)c1ccc(N)cc1)CCN(CC)CC	Ye, X. et al., 2014. A pharmacological network for lifespan extension in Caenorhabditis elegans. Aging cell, 13(2), pp.206–215.	NEGATIVE
Tetracaine hydrochloride	O(C(=O)c1ccc(NCCCC)cc1)CCN(C)C	Ye, X. et al., 2014. A pharmacological network for lifespan extension in Caenorhabditis elegans. Aging cell, 13(2), pp.206–215.	NEGATIVE
Etazolate hydrochloride	O(C(=O)c1cnc2n(ncc2c1NN=C(C)C)CC)CC	Ye, X. et al., 2014. A pharmacological network for lifespan extension in Caenorhabditis elegans. Aging cell, 13(2), pp.206–215.	NEGATIVE
Methyl beta-carboline-3-carboxylate	O(C(=O)c1ncc2[nH]c3c(c2c1)cccc3)C	Ye, X. et al., 2014. A pharmacological network for lifespan extension in Caenorhabditis elegans. Aging cell, 13(2), pp.206–215.	NEGATIVE
Succinylcholine chloride	O(C(=O)CCC(OCC[N+](C)(C)C)=O)CC[N+](C)(C)C	Ye, X. et al., 2014. A pharmacological network for lifespan extension in Caenorhabditis elegans. Aging cell, 13(2), pp.206–215.	NEGATIVE
TMPH hydrochloride	O(C(=O)CCCCCC)C1CC(NC(C1)(C)C)(C)C	Ye, X. et al., 2014. A pharmacological network for lifespan extension in Caenorhabditis elegans. Aging cell, 13(2), pp.206–215.	NEGATIVE
Neostigmine bromide	O(C(=O)N(C)C)c1cc([N+](C)(C)C)ccc1	Ye, X. et al., 2014. A pharmacological network for lifespan extension in Caenorhabditis elegans. Aging cell, 13(2), pp.206–215.	NEGATIVE
(-)-Physostigmine	O(C(=O)NC)c1cc2c(N([C@H]3N(CCC23C)C)C)cc1	Ye, X. et al., 2014. A pharmacological network for lifespan extension in Caenorhabditis elegans. Aging cell, 13(2), pp.206–215.	NEGATIVE
Doxylamine succinate	O(C(C)(c1ccccc1)c1ncccc1)CCN(C)C	Ye, X. et al., 2014. A pharmacological network for lifespan extension in Caenorhabditis elegans. Aging cell, 13(2), pp.206–215.	NEGATIVE
U-101958 maleate	O(C(C)C)c1cccnc1N(C)C1CCN(CC1)Cc1ccccc1	Ye, X. et al., 2014. A pharmacological network for lifespan extension in Caenorhabditis elegans. Aging cell, 13(2), pp.206–215.	NEGATIVE
Benztropine mesylate	O(C(c1ccccc1)c1ccccc1)C1C[C@@H]2N([C@@H](C1)CC2)C	Ye, X. et al., 2014. A pharmacological network for lifespan extension in Caenorhabditis elegans. Aging cell, 13(2), pp.206–215.	NEGATIVE
Diphenhydramine hydrochloride	O(C(c1ccccc1)c1ccccc1)CCN(C)C	Ye, X. et al., 2014. A pharmacological network for lifespan extension in Caenorhabditis elegans. Aging cell, 13(2), pp.206–215.	NEGATIVE
GBR-12935 dihydrochloride	O(C(c1ccccc1)c1ccccc1)CCN1CCN(CC1)CCCc1ccccc1	Ye, X. et al., 2014. A pharmacological network for lifespan extension in Caenorhabditis elegans. Aging cell, 13(2), pp.206–215.	NEGATIVE
2,3-Dimethoxy-1,4-naphthoquinone	O(C)C1=C(OC)C(=O)c2c(cccc2)C1=O	Ye, X. et al., 2014. A pharmacological network for lifespan extension in Caenorhabditis elegans. Aging cell, 13(2), pp.206–215.	NEGATIVE
Foliosidine	O(C)C1=CC(=O)N(c2c1cccc2OC[C@H](O)C(O)(C)C)C	Ye, X. et al., 2014. A pharmacological network for lifespan extension in Caenorhabditis elegans. Aging cell, 13(2), pp.206–215.	NEGATIVE
Colchicine	O(C)C1=CC=C2c3c(cc(OC)c(OC)c3OC)CC[C@@H](NC(=O)C)C2=CC1=O	Ye, X. et al., 2014. A pharmacological network for lifespan extension in Caenorhabditis elegans. Aging cell, 13(2), pp.206–215.	NEGATIVE
(±)-Methoxyverapamil hydrochloride	O(C)c1c(OC)cc(cc1OC)C(C(C)C)(CCCN(CCc1cc(OC)c(OC)cc1)C)C#N	Ye, X. et al., 2014. A pharmacological network for lifespan extension in Caenorhabditis elegans. Aging cell, 13(2), pp.206–215.	NEGATIVE
TMB-8 hydrochloride	O(C)c1c(OC)cc(cc1OC)C(OCCCCCCCCN(CC)CC)=O	Ye, X. et al., 2014. A pharmacological network for lifespan extension in Caenorhabditis elegans. Aging cell, 13(2), pp.206–215.	NEGATIVE
Dilazep hydrochloride	O(C)c1c(OC)cc(cc1OC)C(OCCCN1CCCN(CC1)CCCOC(=O)c1cc(OC)c(OC)c(OC)c1)=O	Ye, X. et al., 2014. A pharmacological network for lifespan extension in Caenorhabditis elegans. Aging cell, 13(2), pp.206–215.	NEGATIVE
T-0156	O(C)c1c(OC)cc(cc1OC)C=1c2c(C(=O)N(Cc3cc(ncc3)C)C=1C(OC)=O)c(OCc1ncccn1)ncc2	Ye, X. et al., 2014. A pharmacological network for lifespan extension in Caenorhabditis elegans. Aging cell, 13(2), pp.206–215.	NEGATIVE
T-1032	O(C)c1c(OC)cc(cc1OC)C=1c2c(cc(OCc3ncccc3)cc2)C(=O)N(C=1C(OC)=O)c1ccc(N)cc1	Ye, X. et al., 2014. A pharmacological network for lifespan extension in Caenorhabditis elegans. Aging cell, 13(2), pp.206–215.	NEGATIVE
Trimethoprim	O(C)c1c(OC)cc(cc1OC)Cc1cnc(nc1N)N	Ye, X. et al., 2014. A pharmacological network for lifespan extension in Caenorhabditis elegans. Aging cell, 13(2), pp.206–215.	NEGATIVE
AFMK	O(C)c1cc(C(=O)CCNC(=O)C)c(NC=O)cc1	Ye, X. et al., 2014. A pharmacological network for lifespan extension in Caenorhabditis elegans. Aging cell, 13(2), pp.206–215.	NEGATIVE
Tyrphostin AG 34	O(C)c1cc(cc(O)c1O)C=C(C#N)C#N	Ye, X. et al., 2014. A pharmacological network for lifespan extension in Caenorhabditis elegans. Aging cell, 13(2), pp.206–215.	NEGATIVE
SNC80	O(C)c1cc(ccc1)[C@H](N1C[C@H](N(C[C@@H]1C)CC=C)C)c1ccc(cc1)C(=O)N(CC)CC	Ye, X. et al., 2014. A pharmacological network for lifespan extension in Caenorhabditis elegans. Aging cell, 13(2), pp.206–215.	NEGATIVE
(±)-Vanillylmandelic acid	O(C)c1cc(ccc1O)[C@@H](O)C(O)=O	Ye, X. et al., 2014. A pharmacological network for lifespan extension in Caenorhabditis elegans. Aging cell, 13(2), pp.206–215.	NEGATIVE
(±)-Normetanephrine hydrochloride	O(C)c1cc(ccc1O)[C@@H](O)CN	Ye, X. et al., 2014. A pharmacological network for lifespan extension in Caenorhabditis elegans. Aging cell, 13(2), pp.206–215.	NEGATIVE
MHPG piperazine	O(C)c1cc(ccc1O)[C@@H](O)CO	Ye, X. et al., 2014. A pharmacological network for lifespan extension in Caenorhabditis elegans. Aging cell, 13(2), pp.206–215.	NEGATIVE
Vanillic acid diethylamide	O(C)c1cc(ccc1O)C(=O)N(CC)CC	Ye, X. et al., 2014. A pharmacological network for lifespan extension in Caenorhabditis elegans. Aging cell, 13(2), pp.206–215.	NEGATIVE
4-Hydroxy-3-methoxyphenylacetic acid	O(C)c1cc(ccc1O)CC(O)=O	Ye, X. et al., 2014. A pharmacological network for lifespan extension in Caenorhabditis elegans. Aging cell, 13(2), pp.206–215.	NEGATIVE
3-Methoxy-4-hydroxyphenethylamine hydrochloride	O(C)c1cc(ccc1O)CCN	Ye, X. et al., 2014. A pharmacological network for lifespan extension in Caenorhabditis elegans. Aging cell, 13(2), pp.206–215.	NEGATIVE
Dihydrocapsaicin	O(C)c1cc(ccc1O)CNC(=O)CCCCCCC(C)C	Ye, X. et al., 2014. A pharmacological network for lifespan extension in Caenorhabditis elegans. Aging cell, 13(2), pp.206–215.	NEGATIVE
N-Vanillylnonanamide	O(C)c1cc(ccc1O)CNC(=O)CCCCCCCC	Ye, X. et al., 2014. A pharmacological network for lifespan extension in Caenorhabditis elegans. Aging cell, 13(2), pp.206–215.	NEGATIVE
Tranilast	O(C)c1cc(ccc1OC)\C=C\C(=O)Nc1ccccc1C(O)=O	Ye, X. et al., 2014. A pharmacological network for lifespan extension in Caenorhabditis elegans. Aging cell, 13(2), pp.206–215.	NEGATIVE
(±)-Verapamil hydrochloride	O(C)c1cc(ccc1OC)C(C(C)C)(CCCN(CCc1cc(OC)c(OC)cc1)C)C#N	Ye, X. et al., 2014. A pharmacological network for lifespan extension in Caenorhabditis elegans. Aging cell, 13(2), pp.206–215.	NEGATIVE
Papaverine hydrochloride	O(C)c1cc(ccc1OC)Cc1nccc2c1cc(OC)c(OC)c2	Ye, X. et al., 2014. A pharmacological network for lifespan extension in Caenorhabditis elegans. Aging cell, 13(2), pp.206–215.	NEGATIVE
YS-035 hydrochloride	O(C)c1cc(ccc1OC)CCN(CCc1cc(OC)c(OC)cc1)C	Ye, X. et al., 2014. A pharmacological network for lifespan extension in Caenorhabditis elegans. Aging cell, 13(2), pp.206–215.	NEGATIVE
R(-)-Denopamine	O(C)c1cc(ccc1OC)CCNC[C@@H](O)c1ccc(O)cc1	Ye, X. et al., 2014. A pharmacological network for lifespan extension in Caenorhabditis elegans. Aging cell, 13(2), pp.206–215.	NEGATIVE
IC 261	O(C)c1cc(OC)cc(OC)c1\C=C\1/c2c(NC/1=O)cccc2	Ye, X. et al., 2014. A pharmacological network for lifespan extension in Caenorhabditis elegans. Aging cell, 13(2), pp.206–215.	NEGATIVE
SU 9516	O(C)c1cc\2c(NC(=O)/C/2=C\c2[nH]cnc2)cc1	Ye, X. et al., 2014. A pharmacological network for lifespan extension in Caenorhabditis elegans. Aging cell, 13(2), pp.206–215.	NEGATIVE
2-methoxyestradiol	O(C)c1cc2[C@H]3[C@H]([C@@H]4CC[C@H](O)C4(CC3)C)CCc2cc1O	Ye, X. et al., 2014. A pharmacological network for lifespan extension in Caenorhabditis elegans. Aging cell, 13(2), pp.206–215.	NEGATIVE
L-655,708	O(C)c1cc2c(-n3c([C@H]4N(CCC4)C2=O)c(nc3)C(OCC)=O)cc1	Ye, X. et al., 2014. A pharmacological network for lifespan extension in Caenorhabditis elegans. Aging cell, 13(2), pp.206–215.	NEGATIVE
5-Methoxy DMT oxalate	O(C)c1cc2c([nH]cc2CCN(C)C)cc1	Ye, X. et al., 2014. A pharmacological network for lifespan extension in Caenorhabditis elegans. Aging cell, 13(2), pp.206–215.	NEGATIVE
O-Methylserotonin hydrochloride	O(C)c1cc2c([nH]cc2CCN)cc1	Ye, X. et al., 2014. A pharmacological network for lifespan extension in Caenorhabditis elegans. Aging cell, 13(2), pp.206–215.	NEGATIVE
Melatonin	O(C)c1cc2c([nH]cc2CCNC(=O)C)cc1	Ye, X. et al., 2014. A pharmacological network for lifespan extension in Caenorhabditis elegans. Aging cell, 13(2), pp.206–215.	NEGATIVE
6-Hydroxymelatonin	O(C)c1cc2c([nH]cc2CCNC(=O)C)cc1O	Ye, X. et al., 2014. A pharmacological network for lifespan extension in Caenorhabditis elegans. Aging cell, 13(2), pp.206–215.	NEGATIVE
(-)-Naproxen sodium	O(C)c1cc2c(cc(cc2)[C@H](C(O)=O)C)cc1	Ye, X. et al., 2014. A pharmacological network for lifespan extension in Caenorhabditis elegans. Aging cell, 13(2), pp.206–215.	NEGATIVE
R(-)-SCH-12679 maleate	O(C)c1cc2c(cc1OC)CCN(C[C@@H]2c1ccccc1)C	Ye, X. et al., 2014. A pharmacological network for lifespan extension in Caenorhabditis elegans. Aging cell, 13(2), pp.206–215.	NEGATIVE
Emetine dihydrochloride hydrate	O(C)c1cc2c(cc1OC)CCN[C@@H]2C[C@H]1C[C@@H]2N(C[C@H]1CC)CCc1cc(OC)c(OC)cc12	Ye, X. et al., 2014. A pharmacological network for lifespan extension in Caenorhabditis elegans. Aging cell, 13(2), pp.206–215.	NEGATIVE
1-benzoyl-5-methoxy-2-methylindole-3-acetic acid	O(C)c1cc2c(n(C(=O)c3ccccc3)c(C)c2CC(O)=O)cc1	Ye, X. et al., 2014. A pharmacological network for lifespan extension in Caenorhabditis elegans. Aging cell, 13(2), pp.206–215.	NEGATIVE
IIK7	O(C)c1cc2c(n3c(-c4c(C3)cccc4)c2CCNC(=O)CCC)cc1	Ye, X. et al., 2014. A pharmacological network for lifespan extension in Caenorhabditis elegans. Aging cell, 13(2), pp.206–215.	NEGATIVE
K 185	O(C)c1cc2c(n3c(-c4c(CCC3)cccc4)c2CCNC(=O)CCC)cc1	Ye, X. et al., 2014. A pharmacological network for lifespan extension in Caenorhabditis elegans. Aging cell, 13(2), pp.206–215.	NEGATIVE
L-765,314	O(C)c1cc2c(nc(nc2N)N2C[C@H](N(CC2)C(OCc2ccccc2)=O)C(=O)NC(C)(C)C)cc1OC	Ye, X. et al., 2014. A pharmacological network for lifespan extension in Caenorhabditis elegans. Aging cell, 13(2), pp.206–215.	NEGATIVE
Quinine sulfate	O(C)c1cc2c(nccc2[C@@H](O)[C@H]2N3C[C@@H]([C@H](C2)CC3)C=C)cc1	Ye, X. et al., 2014. A pharmacological network for lifespan extension in Caenorhabditis elegans. Aging cell, 13(2), pp.206–215.	NEGATIVE
Dextromethorphan hydrobromide monohydrate	O(C)c1cc2C34[C@@H]([C@@H](N(CC3)C)Cc2cc1)CCCC4	Ye, X. et al., 2014. A pharmacological network for lifespan extension in Caenorhabditis elegans. Aging cell, 13(2), pp.206–215.	NEGATIVE
3-Methoxy-morphanin hydrochloride	O(C)c1cc2C34[C@@H]([C@H](NCC3)Cc2cc1)CCCC4	Ye, X. et al., 2014. A pharmacological network for lifespan extension in Caenorhabditis elegans. Aging cell, 13(2), pp.206–215.	NEGATIVE
Methyl 6,7-dimethoxy-4-ethyl-beta-carboline-3-carboxylate	O(C)c1cc2c3c([nH]c2cc1OC)cnc(C(OC)=O)c3CC	Ye, X. et al., 2014. A pharmacological network for lifespan extension in Caenorhabditis elegans. Aging cell, 13(2), pp.206–215.	NEGATIVE
6-Methoxy-1,2,3,4-tetrahydro-9H-pyrido[3,4b] indole	O(C)c1cc2c3CCNCc3[nH]c2cc1	Ye, X. et al., 2014. A pharmacological network for lifespan extension in Caenorhabditis elegans. Aging cell, 13(2), pp.206–215.	NEGATIVE
U-99194A maleate	O(C)c1cc2CC(N(CCC)CCC)Cc2cc1OC	Ye, X. et al., 2014. A pharmacological network for lifespan extension in Caenorhabditis elegans. Aging cell, 13(2), pp.206–215.	NEGATIVE
U-73122	O(C)c1cc2CC[C@H]3[C@@H]4CC[C@H](NCCCCCCN5C(=O)C=CC5=O)C4(CC[C@H]3c2cc1)C	Ye, X. et al., 2014. A pharmacological network for lifespan extension in Caenorhabditis elegans. Aging cell, 13(2), pp.206–215.	NEGATIVE
Vinblastine sulfate salt	O(C)c1cc2N([C@@H]3C4([C@@H]5N(CC4)CC=CC5(CC)[C@@H](OC(=O)C)C3(O)C(OC)=O)c2cc1C1(c2[nH]c3c(c2CCN2CC(O)(C[C@H](C1)C2)CC)cccc3)C(OC)=O)C	Ye, X. et al., 2014. A pharmacological network for lifespan extension in Caenorhabditis elegans. Aging cell, 13(2), pp.206–215.	NEGATIVE
SR-95531	O(C)c1ccc(cc1)-c1n[n+](CCCC(=O)[O-])c(N)cc1	Ye, X. et al., 2014. A pharmacological network for lifespan extension in Caenorhabditis elegans. Aging cell, 13(2), pp.206–215.	NEGATIVE
Aniracetam	O(C)c1ccc(cc1)C(=O)N1CCCC1=O	Ye, X. et al., 2014. A pharmacological network for lifespan extension in Caenorhabditis elegans. Aging cell, 13(2), pp.206–215.	NEGATIVE
Formoterol	O(C)c1ccc(cc1)C[C@H](NC[C@@H](O)c1cc(NC=O)c(O)cc1)C	Ye, X. et al., 2014. A pharmacological network for lifespan extension in Caenorhabditis elegans. Aging cell, 13(2), pp.206–215.	NEGATIVE
Tyrphostin 1	O(C)c1ccc(cc1)C=C(C#N)C#N	Ye, X. et al., 2014. A pharmacological network for lifespan extension in Caenorhabditis elegans. Aging cell, 13(2), pp.206–215.	NEGATIVE
Pyrilamine maleate	O(C)c1ccc(cc1)CN(CCN(C)C)c1ncccc1	Ye, X. et al., 2014. A pharmacological network for lifespan extension in Caenorhabditis elegans. Aging cell, 13(2), pp.206–215.	NEGATIVE
GR 4661	O(C)c1ccc(cc1)CNC(=O)\C=C\c1cc2c([nH]cc2CCN(C)C)cc1	Ye, X. et al., 2014. A pharmacological network for lifespan extension in Caenorhabditis elegans. Aging cell, 13(2), pp.206–215.	NEGATIVE
Picotamide	O(C)c1ccc(cc1C(=O)NCc1cccnc1)C(=O)NCc1cccnc1	Ye, X. et al., 2014. A pharmacological network for lifespan extension in Caenorhabditis elegans. Aging cell, 13(2), pp.206–215.	NEGATIVE
4-Methoxy-3-hydroxyphenethylamine hydrochloride	O(C)c1ccc(cc1O)CCN	Ye, X. et al., 2014. A pharmacological network for lifespan extension in Caenorhabditis elegans. Aging cell, 13(2), pp.206–215.	NEGATIVE
Methoxamine hydrochloride	O(C)c1ccc(OC)cc1[C@H](O)[C@H](N)C	Ye, X. et al., 2014. A pharmacological network for lifespan extension in Caenorhabditis elegans. Aging cell, 13(2), pp.206–215.	NEGATIVE
R(-)-Apocodeine hydrochloride	O(C)c1ccc2c(-c3c4[C@@H](N(CCc4ccc3)C)C2)c1O	Ye, X. et al., 2014. A pharmacological network for lifespan extension in Caenorhabditis elegans. Aging cell, 13(2), pp.206–215.	NEGATIVE
Methoctramine tetrahydrochloride	O(C)c1ccccc1CNCCCCCCNCCCCCCCCNCCCCCCNCc1ccccc1OC	Ye, X. et al., 2014. A pharmacological network for lifespan extension in Caenorhabditis elegans. Aging cell, 13(2), pp.206–215.	NEGATIVE
NAN-190 hydrobromide	O(C)c1ccccc1N1CCN(CC1)CCCCN1C(=O)c2c(cccc2)C1=O	Ye, X. et al., 2014. A pharmacological network for lifespan extension in Caenorhabditis elegans. Aging cell, 13(2), pp.206–215.	NEGATIVE
BP 897	O(C)c1ccccc1N1CCN(CC1)CCCCNC(=O)c1cc2c(cc1)cccc2	Ye, X. et al., 2014. A pharmacological network for lifespan extension in Caenorhabditis elegans. Aging cell, 13(2), pp.206–215.	NEGATIVE
Urapidil hydrochloride	O(C)c1ccccc1N1CCN(CC1)CCCNC=1N(C)C(=O)N(C)C(=O)C=1	Ye, X. et al., 2014. A pharmacological network for lifespan extension in Caenorhabditis elegans. Aging cell, 13(2), pp.206–215.	NEGATIVE
Urapidil, 5-Methyl-	O(C)c1ccccc1N1CCN(CC1)CCCNC=1N(C)C(=O)N(C)C(=O)C=1C	Ye, X. et al., 2014. A pharmacological network for lifespan extension in Caenorhabditis elegans. Aging cell, 13(2), pp.206–215.	NEGATIVE
WAY-100635 maleate	O(C)c1ccccc1N1CCN(CC1)CCN(C(=O)C1CCCCC1)c1ncccc1	Ye, X. et al., 2014. A pharmacological network for lifespan extension in Caenorhabditis elegans. Aging cell, 13(2), pp.206–215.	NEGATIVE
BMY 7378 dihydrochloride	O(C)c1ccccc1N1CCN(CC1)CCN1C(=O)CC2(CC1=O)CCCC2	Ye, X. et al., 2014. A pharmacological network for lifespan extension in Caenorhabditis elegans. Aging cell, 13(2), pp.206–215.	NEGATIVE
1-(2-Methoxyphenyl)piperazine hydrochloride	O(C)c1ccccc1N1CCNCC1	Ye, X. et al., 2014. A pharmacological network for lifespan extension in Caenorhabditis elegans. Aging cell, 13(2), pp.206–215.	NEGATIVE
VUF 5574	O(C)c1ccccc1NC(=O)Nc1nc(nc2c1cccc2)-c1cccnc1	Ye, X. et al., 2014. A pharmacological network for lifespan extension in Caenorhabditis elegans. Aging cell, 13(2), pp.206–215.	NEGATIVE
Nisoxetine hydrochloride	O(C)c1ccccc1O[C@H](CCNC)c1ccccc1	Ye, X. et al., 2014. A pharmacological network for lifespan extension in Caenorhabditis elegans. Aging cell, 13(2), pp.206–215.	NEGATIVE
R(-)-Me5	O(C[C@@H](N)C(C)C)c1c(cccc1C)C	Ye, X. et al., 2014. A pharmacological network for lifespan extension in Caenorhabditis elegans. Aging cell, 13(2), pp.206–215.	NEGATIVE
Mexiletene hydrochloride	O(C[C@@H](N)C)c1c(cccc1C)C	Ye, X. et al., 2014. A pharmacological network for lifespan extension in Caenorhabditis elegans. Aging cell, 13(2), pp.206–215.	NEGATIVE
ICI 118,551 hydrochloride	O(C[C@@H](O)[C@@H](NC(C)C)C)c1c2c(CCC2)c(cc1)C	Ye, X. et al., 2014. A pharmacological network for lifespan extension in Caenorhabditis elegans. Aging cell, 13(2), pp.206–215.	NEGATIVE
SR 59230A oxalate	O(C[C@@H](O)CN[C@@H]1CCc2c(C1)cccc2)c1ccccc1CC	Ye, X. et al., 2014. A pharmacological network for lifespan extension in Caenorhabditis elegans. Aging cell, 13(2), pp.206–215.	NEGATIVE
Ranolazine dihydrochloride	O(C[C@H](O)CN1CCN(CC1)CC(=O)Nc1c(cccc1C)C)c1ccccc1OC	Ye, X. et al., 2014. A pharmacological network for lifespan extension in Caenorhabditis elegans. Aging cell, 13(2), pp.206–215.	NEGATIVE
(±)-CGP-12177A hydrochloride	O(C[C@H](O)CNC(C)(C)C)c1c2NC(=O)Nc2ccc1	Ye, X. et al., 2014. A pharmacological network for lifespan extension in Caenorhabditis elegans. Aging cell, 13(2), pp.206–215.	NEGATIVE
Pindolol	O(C[C@H](O)CNC(C)C)c1c2c([nH]cc2)ccc1	Ye, X. et al., 2014. A pharmacological network for lifespan extension in Caenorhabditis elegans. Aging cell, 13(2), pp.206–215.	NEGATIVE
(±)-Propranolol hydrochloride	O(C[C@H](O)CNC(C)C)c1c2c(ccc1)cccc2	Ye, X. et al., 2014. A pharmacological network for lifespan extension in Caenorhabditis elegans. Aging cell, 13(2), pp.206–215.	NEGATIVE
(±)-Atenolol	O(C[C@H](O)CNC(C)C)c1ccc(cc1)CC(=O)N	Ye, X. et al., 2014. A pharmacological network for lifespan extension in Caenorhabditis elegans. Aging cell, 13(2), pp.206–215.	NEGATIVE
(±)-Metoprolol (+)-tartrate	O(C[C@H](O)CNC(C)C)c1ccc(cc1)CCOC	Ye, X. et al., 2014. A pharmacological network for lifespan extension in Caenorhabditis elegans. Aging cell, 13(2), pp.206–215.	NEGATIVE
Betaxolol hydrochloride	O(C[C@H](O)CNC(C)C)c1ccc(cc1)CCOCC1CC1	Ye, X. et al., 2014. A pharmacological network for lifespan extension in Caenorhabditis elegans. Aging cell, 13(2), pp.206–215.	NEGATIVE
Bisoprolol hemifumarate salt	O(C[C@H](O)CNC(C)C)c1ccc(cc1)COCCOC(C)C	Ye, X. et al., 2014. A pharmacological network for lifespan extension in Caenorhabditis elegans. Aging cell, 13(2), pp.206–215.	NEGATIVE
Alprenolol hydrochloride	O(C[C@H](O)CNC(C)C)c1ccccc1CC=C	Ye, X. et al., 2014. A pharmacological network for lifespan extension in Caenorhabditis elegans. Aging cell, 13(2), pp.206–215.	NEGATIVE
Propafenone hydrochloride	O(C[C@H](O)CNCCC)c1ccccc1C(=O)CCc1ccccc1	Ye, X. et al., 2014. A pharmacological network for lifespan extension in Caenorhabditis elegans. Aging cell, 13(2), pp.206–215.	NEGATIVE
Rolipram	O(c1cc(ccc1OC)[C@@H]1CC(=O)NC1)C1CCCC1	Ye, X. et al., 2014. A pharmacological network for lifespan extension in Caenorhabditis elegans. Aging cell, 13(2), pp.206–215.	NEGATIVE
MRS 1754	O(CC(=O)Nc1ccc(cc1)C#N)c1ccc(cc1)-c1[nH]c2c(n1)N(CCC)C(=O)N(CCC)C2=O	Ye, X. et al., 2014. A pharmacological network for lifespan extension in Caenorhabditis elegans. Aging cell, 13(2), pp.206–215.	NEGATIVE
Xanthine amine congener	O(CC(=O)NCCN)c1ccc(cc1)-c1[nH]c2c(n1)N(CCC)C(=O)N(CCC)C2=O	Ye, X. et al., 2014. A pharmacological network for lifespan extension in Caenorhabditis elegans. Aging cell, 13(2), pp.206–215.	NEGATIVE
Bepridil hydrochloride	O(CC(C)C)C[C@@H](N1CCCC1)CN(Cc1ccccc1)c1ccccc1	Ye, X. et al., 2014. A pharmacological network for lifespan extension in Caenorhabditis elegans. Aging cell, 13(2), pp.206–215.	NEGATIVE
Carisoprodol	O(CC(CCC)(COC(=O)N)C)C(=O)NC(C)C	Ye, X. et al., 2014. A pharmacological network for lifespan extension in Caenorhabditis elegans. Aging cell, 13(2), pp.206–215.	NEGATIVE
Felbamate	O(CC(COC(=O)N)c1ccccc1)C(=O)N	Ye, X. et al., 2014. A pharmacological network for lifespan extension in Caenorhabditis elegans. Aging cell, 13(2), pp.206–215.	NEGATIVE
Carbachol	O(CC[N+](C)(C)C)C([O-])=N	Ye, X. et al., 2014. A pharmacological network for lifespan extension in Caenorhabditis elegans. Aging cell, 13(2), pp.206–215.	NEGATIVE
Gallamine triethiodide	O(CC[N+](CC)(CC)CC)c1c(OCC[N+](CC)(CC)CC)cccc1OCC[N+](CC)(CC)CC	Ye, X. et al., 2014. A pharmacological network for lifespan extension in Caenorhabditis elegans. Aging cell, 13(2), pp.206–215.	NEGATIVE
MG 624	O(CC[N+](CC)(CC)CC)c1ccc(cc1)\C=C\c1ccccc1	Ye, X. et al., 2014. A pharmacological network for lifespan extension in Caenorhabditis elegans. Aging cell, 13(2), pp.206–215.	NEGATIVE
Cirazoline hydrochloride	O(CC=1NCCN=1)c1ccccc1C1CC1	Ye, X. et al., 2014. A pharmacological network for lifespan extension in Caenorhabditis elegans. Aging cell, 13(2), pp.206–215.	NEGATIVE
MDL 28170	O(Cc1ccccc1)C(=O)N[C@H](C(C)C)C(=O)N[C@H](Cc1ccccc1)C=O	Ye, X. et al., 2014. A pharmacological network for lifespan extension in Caenorhabditis elegans. Aging cell, 13(2), pp.206–215.	NEGATIVE
SCH-28080	O(Cc1ccccc1)C=1c2n(C=CC=1)c(CC#N)c(n2)C	Ye, X. et al., 2014. A pharmacological network for lifespan extension in Caenorhabditis elegans. Aging cell, 13(2), pp.206–215.	NEGATIVE
O6-benzylguanine	O(Cc1ccccc1)c1nc(nc2nc[nH]c12)N	Ye, X. et al., 2014. A pharmacological network for lifespan extension in Caenorhabditis elegans. Aging cell, 13(2), pp.206–215.	NEGATIVE
REV 5901	O(Cc1nc2c(cc1)cccc2)c1cc(ccc1)[C@H](O)CCCCC	Ye, X. et al., 2014. A pharmacological network for lifespan extension in Caenorhabditis elegans. Aging cell, 13(2), pp.206–215.	NEGATIVE
SR 2640	O(Cc1nc2c(cc1)cccc2)c1cc(Nc2ccccc2C(O)=O)ccc1	Ye, X. et al., 2014. A pharmacological network for lifespan extension in Caenorhabditis elegans. Aging cell, 13(2), pp.206–215.	NEGATIVE
Zaprinast	O(CCC)c1ccccc1C1=NC(=O)C2=NNNC2=N1	Ye, X. et al., 2014. A pharmacological network for lifespan extension in Caenorhabditis elegans. Aging cell, 13(2), pp.206–215.	NEGATIVE
Cilostamide	O(CCCC(=O)N(C)C1CCCCC1)c1cc2C=CC(=O)Nc2cc1	Ye, X. et al., 2014. A pharmacological network for lifespan extension in Caenorhabditis elegans. Aging cell, 13(2), pp.206–215.	NEGATIVE
Ro 20-1724	O(CCCC)c1cc(ccc1OC)C[C@H]1NC(=O)NC1	Ye, X. et al., 2014. A pharmacological network for lifespan extension in Caenorhabditis elegans. Aging cell, 13(2), pp.206–215.	NEGATIVE
SKF 96365	O(CCCc1ccc(OC)cc1)c1cc(ccc1OC)CCn1ccnc1	Ye, X. et al., 2014. A pharmacological network for lifespan extension in Caenorhabditis elegans. Aging cell, 13(2), pp.206–215.	NEGATIVE
Cilostazol	O(CCCCc1nnnn1C1CCCCC1)c1cc2CCC(=O)Nc2cc1	Ye, X. et al., 2014. A pharmacological network for lifespan extension in Caenorhabditis elegans. Aging cell, 13(2), pp.206–215.	NEGATIVE
Pentamidine isethionate	O(CCCCCOc1ccc(cc1)C(N)=N)c1ccc(cc1)C(N)=N	Ye, X. et al., 2014. A pharmacological network for lifespan extension in Caenorhabditis elegans. Aging cell, 13(2), pp.206–215.	NEGATIVE
Tamoxifen citrate	O(CCN(C)C)c1ccc(cc1)\C(=C(/CC)\c1ccccc1)\c1ccccc1	Ye, X. et al., 2014. A pharmacological network for lifespan extension in Caenorhabditis elegans. Aging cell, 13(2), pp.206–215.	NEGATIVE
GW1929	O(CCN(C)c1ncccc1)c1ccc(cc1)C[C@@H](Nc1ccccc1C(=O)c1ccccc1)C(O)=O	Ye, X. et al., 2014. A pharmacological network for lifespan extension in Caenorhabditis elegans. Aging cell, 13(2), pp.206–215.	NEGATIVE
Ethylene glycol-bis(2-aminoethylether)-N,N,N',N'-tetraacetic acid	O(CCN(CC(O)=O)CC(O)=O)CCOCCN(CC(O)=O)CC(O)=O	Ye, X. et al., 2014. A pharmacological network for lifespan extension in Caenorhabditis elegans. Aging cell, 13(2), pp.206–215.	NEGATIVE
O-(Carboxymethyl)hydroxylamine hemihydrochloride	O(N)CC(O)=O	Ye, X. et al., 2014. A pharmacological network for lifespan extension in Caenorhabditis elegans. Aging cell, 13(2), pp.206–215.	NEGATIVE
NO-711 hydrochloride	O(N=C(c1ccccc1)c1ccccc1)CCN1CC(=CCC1)C(O)=O	Ye, X. et al., 2014. A pharmacological network for lifespan extension in Caenorhabditis elegans. Aging cell, 13(2), pp.206–215.	NEGATIVE
L-Canavanine sulfate	O(N=C(N)N)CC[C@@H](N)C(O)=O	Ye, X. et al., 2014. A pharmacological network for lifespan extension in Caenorhabditis elegans. Aging cell, 13(2), pp.206–215.	NEGATIVE
2-Cyclooctyl-2-hydroxyethylamine hydrochloride	O[C@@H](CN)C1CCCCCCC1	Ye, X. et al., 2014. A pharmacological network for lifespan extension in Caenorhabditis elegans. Aging cell, 13(2), pp.206–215.	NEGATIVE
NCS-382	O[C@@H]/1c2c(CCC\C\1=C/C(O)=O)cccc2	Ye, X. et al., 2014. A pharmacological network for lifespan extension in Caenorhabditis elegans. Aging cell, 13(2), pp.206–215.	NEGATIVE
1-Deoxynojirimycin hydrochloride	O[C@@H]1[C@H](O)[C@H](O)CN[C@@H]1CO	Ye, X. et al., 2014. A pharmacological network for lifespan extension in Caenorhabditis elegans. Aging cell, 13(2), pp.206–215.	NEGATIVE
5alpha-Pregnan-3alpha-ol-20-one	O[C@@H]1CCC2([C@H](C1)CC[C@@H]1[C@@H]3CC[C@@H](C(=O)C)C3(CC[C@H]12)C)C	Ye, X. et al., 2014. A pharmacological network for lifespan extension in Caenorhabditis elegans. Aging cell, 13(2), pp.206–215.	NEGATIVE
3-alpha,21-Dihydroxy-5-alpha-pregnan-20-one	O[C@@H]1CCC2([C@H](C1)CC[C@H]1[C@H]3CC[C@H](C(=O)CO)C3(CC[C@@H]12)C)C	Ye, X. et al., 2014. A pharmacological network for lifespan extension in Caenorhabditis elegans. Aging cell, 13(2), pp.206–215.	NEGATIVE
(±)-Vesamicol hydrochloride	O[C@@H]1CCCC[C@@H]1N1CCC(CC1)c1ccccc1	Ye, X. et al., 2014. A pharmacological network for lifespan extension in Caenorhabditis elegans. Aging cell, 13(2), pp.206–215.	NEGATIVE
Erythro-9-(2-Hydroxy-3-nonyl)adenine hydrochloride	O[C@H]([C@H](n1c2ncnc(N)c2nc1)CCCCCC)C	Ye, X. et al., 2014. A pharmacological network for lifespan extension in Caenorhabditis elegans. Aging cell, 13(2), pp.206–215.	NEGATIVE
(-)-Ephedrine hemisulfate	O[C@H]([C@H](NC)C)c1ccccc1	Ye, X. et al., 2014. A pharmacological network for lifespan extension in Caenorhabditis elegans. Aging cell, 13(2), pp.206–215.	NEGATIVE
1,4-Dideoxy-1,4-imino-D-arabinitol	O[C@H]1[C@H](NC[C@H]1O)CO	Ye, X. et al., 2014. A pharmacological network for lifespan extension in Caenorhabditis elegans. Aging cell, 13(2), pp.206–215.	NEGATIVE
Hydroxytacrine maleate	O[C@H]1c2c(nc3c(cccc3)c2N)CCC1	Ye, X. et al., 2014. A pharmacological network for lifespan extension in Caenorhabditis elegans. Aging cell, 13(2), pp.206–215.	NEGATIVE
Yohimbine hydrochloride	O[C@H]1CC[C@@H]2[C@H](C[C@@H]3N(CCc4c5c([nH]c34)cccc5)C2)[C@H]1C(OC)=O	Ye, X. et al., 2014. A pharmacological network for lifespan extension in Caenorhabditis elegans. Aging cell, 13(2), pp.206–215.	NEGATIVE
7-Nitroindazole	O=[N+]([O-])c1c2[nH]ncc2ccc1	Ye, X. et al., 2014. A pharmacological network for lifespan extension in Caenorhabditis elegans. Aging cell, 13(2), pp.206–215.	NEGATIVE
CNQX disodium	O=[N+]([O-])c1cc2nc([O-])c([O-])nc2cc1C#N	Ye, X. et al., 2014. A pharmacological network for lifespan extension in Caenorhabditis elegans. Aging cell, 13(2), pp.206–215.	NEGATIVE
2,3-Butanedione monoxime	O=C(\C(=N\O)\C)C	Ye, X. et al., 2014. A pharmacological network for lifespan extension in Caenorhabditis elegans. Aging cell, 13(2), pp.206–215.	NEGATIVE
2,3-Butanedione	O=C(C(=O)C)C	Ye, X. et al., 2014. A pharmacological network for lifespan extension in Caenorhabditis elegans. Aging cell, 13(2), pp.206–215.	NEGATIVE
Ibudilast	O=C(C(C)C)c1c2n(nc1C(C)C)C=CC=C2	Ye, X. et al., 2014. A pharmacological network for lifespan extension in Caenorhabditis elegans. Aging cell, 13(2), pp.206–215.	NEGATIVE
alpha-Lobeline hydrochloride	O=C(C[C@@H]1N(C)[C@H](CCC1)C[C@@H](O)c1ccccc1)c1ccccc1	Ye, X. et al., 2014. A pharmacological network for lifespan extension in Caenorhabditis elegans. Aging cell, 13(2), pp.206–215.	NEGATIVE
JWH-015	O=C(c1c2c(n(CCC)c1C)cccc2)c1c2c(ccc1)cccc2	Ye, X. et al., 2014. A pharmacological network for lifespan extension in Caenorhabditis elegans. Aging cell, 13(2), pp.206–215.	NEGATIVE
BW 284c51	O=C(CC[N+](C)(C)c1ccc(cc1)CC=C)CC[N+](C)(C)c1ccc(cc1)CC=C	Ye, X. et al., 2014. A pharmacological network for lifespan extension in Caenorhabditis elegans. Aging cell, 13(2), pp.206–215.	NEGATIVE
ZM 39923 hydrochloride	O=C(CCN(Cc1ccccc1)C(C)C)c1cc2c(cc1)cccc2	Ye, X. et al., 2014. A pharmacological network for lifespan extension in Caenorhabditis elegans. Aging cell, 13(2), pp.206–215.	NEGATIVE
N,N,N',N'-Tetramethylazodicarboxamide	O=C(N(C)C)N=NC(=O)N(C)C	Ye, X. et al., 2014. A pharmacological network for lifespan extension in Caenorhabditis elegans. Aging cell, 13(2), pp.206–215.	NEGATIVE
Acetamide	O=C(N)C	Ye, X. et al., 2014. A pharmacological network for lifespan extension in Caenorhabditis elegans. Aging cell, 13(2), pp.206–215.	NEGATIVE
3-aminobenzamide	O=C(N)c1cc(N)ccc1	Ye, X. et al., 2014. A pharmacological network for lifespan extension in Caenorhabditis elegans. Aging cell, 13(2), pp.206–215.	NEGATIVE
CB 1954	O=C(N)c1cc(N2CC2)c([N+](=O)[O-])cc1[N+](=O)[O-]	Ye, X. et al., 2014. A pharmacological network for lifespan extension in Caenorhabditis elegans. Aging cell, 13(2), pp.206–215.	NEGATIVE
SD-169	O=C(N)c1cc2c([nH]cc2)cc1	Ye, X. et al., 2014. A pharmacological network for lifespan extension in Caenorhabditis elegans. Aging cell, 13(2), pp.206–215.	NEGATIVE
N,N-Dipropyl-5-carboxamidotryptamine maleate	O=C(N)c1cc2c([nH]cc2CCN(CCC)CCC)cc1	Ye, X. et al., 2014. A pharmacological network for lifespan extension in Caenorhabditis elegans. Aging cell, 13(2), pp.206–215.	NEGATIVE
5-Carboxamidotryptamine maleate	O=C(N)c1cc2c([nH]cc2CCN)cc1	Ye, X. et al., 2014. A pharmacological network for lifespan extension in Caenorhabditis elegans. Aging cell, 13(2), pp.206–215.	NEGATIVE
Benzamide	O=C(N)c1ccccc1	Ye, X. et al., 2014. A pharmacological network for lifespan extension in Caenorhabditis elegans. Aging cell, 13(2), pp.206–215.	NEGATIVE
Pyrazinecarboxamide	O=C(N)c1nccnc1	Ye, X. et al., 2014. A pharmacological network for lifespan extension in Caenorhabditis elegans. Aging cell, 13(2), pp.206–215.	NEGATIVE
N-(3,3-Diphenylpropyl)glycinamide	O=C(N)CNCCC(c1ccccc1)c1ccccc1	Ye, X. et al., 2014. A pharmacological network for lifespan extension in Caenorhabditis elegans. Aging cell, 13(2), pp.206–215.	NEGATIVE
Carbamazepine	O=C(N)N1c2c(C=Cc3c1cccc3)cccc2	Ye, X. et al., 2014. A pharmacological network for lifespan extension in Caenorhabditis elegans. Aging cell, 13(2), pp.206–215.	NEGATIVE
R(+)-Terguride	O=C(N[C@@H]1C[C@@H]2[C@@H](N(C1)C)Cc1c3c2cccc3[nH]c1)N(CC)CC	Ye, X. et al., 2014. A pharmacological network for lifespan extension in Caenorhabditis elegans. Aging cell, 13(2), pp.206–215.	NEGATIVE
SB 222200	O=C(N[C@H](CC)c1ccccc1)c1c2c(nc(-c3ccccc3)c1C)cccc2	Ye, X. et al., 2014. A pharmacological network for lifespan extension in Caenorhabditis elegans. Aging cell, 13(2), pp.206–215.	NEGATIVE
DM 235	O=C(N1CCN(CC1)C(=O)CC)c1ccccc1	Ye, X. et al., 2014. A pharmacological network for lifespan extension in Caenorhabditis elegans. Aging cell, 13(2), pp.206–215.	NEGATIVE
N-Methyl-beta-carboline-3-carboxamide	O=C(NC)c1ncc2[nH]c3c(c2c1)cccc3	Ye, X. et al., 2014. A pharmacological network for lifespan extension in Caenorhabditis elegans. Aging cell, 13(2), pp.206–215.	NEGATIVE
Tocainide hydrochloride	O=C(Nc1c(cccc1C)C)[C@@H](N)C	Ye, X. et al., 2014. A pharmacological network for lifespan extension in Caenorhabditis elegans. Aging cell, 13(2), pp.206–215.	NEGATIVE
Lidocaine N-methyl hydrochloride	O=C(Nc1c(cccc1C)C)C[N+](C)(C)C	Ye, X. et al., 2014. A pharmacological network for lifespan extension in Caenorhabditis elegans. Aging cell, 13(2), pp.206–215.	NEGATIVE
Lidocaine N-ethyl bromide quaternary salt	O=C(Nc1c(cccc1C)C)C[N+](CC)(CC)CC	Ye, X. et al., 2014. A pharmacological network for lifespan extension in Caenorhabditis elegans. Aging cell, 13(2), pp.206–215.	NEGATIVE
Lidocaine hydrochloride	O=C(Nc1c(cccc1C)C)CN(CC)CC	Ye, X. et al., 2014. A pharmacological network for lifespan extension in Caenorhabditis elegans. Aging cell, 13(2), pp.206–215.	NEGATIVE
LY-278,584 maleate	O=C(NC1C[C@@H]2N([C@@H](C1)CC2)C)c1nn(c2c1cccc2)C	Ye, X. et al., 2014. A pharmacological network for lifespan extension in Caenorhabditis elegans. Aging cell, 13(2), pp.206–215.	NEGATIVE
SB 200646 hydrochloride	O=C(Nc1cc2c(n(cc2)C)cc1)Nc1cccnc1	Ye, X. et al., 2014. A pharmacological network for lifespan extension in Caenorhabditis elegans. Aging cell, 13(2), pp.206–215.	NEGATIVE
Prilocaine hydrochloride	O=C(Nc1ccccc1C)[C@H](NCCC)C	Ye, X. et al., 2014. A pharmacological network for lifespan extension in Caenorhabditis elegans. Aging cell, 13(2), pp.206–215.	NEGATIVE
SB 206553 hydrochloride	O=C(Nc1cccnc1)N1CCc2c1cc1c(n(cc1)C)c2	Ye, X. et al., 2014. A pharmacological network for lifespan extension in Caenorhabditis elegans. Aging cell, 13(2), pp.206–215.	NEGATIVE
Y-27632 dihydrochloride	O=C(Nc1ccncc1)C1CCC(CC1)[C@H](N)C	Ye, X. et al., 2014. A pharmacological network for lifespan extension in Caenorhabditis elegans. Aging cell, 13(2), pp.206–215.	NEGATIVE
Procainamide hydrochloride	O=C(NCCN(CC)CC)c1ccc(N)cc1	Ye, X. et al., 2014. A pharmacological network for lifespan extension in Caenorhabditis elegans. Aging cell, 13(2), pp.206–215.	NEGATIVE
N-Acetylprocainamide hydrochloride	O=C(NCCN(CC)CC)c1ccc(NC(=O)C)cc1	Ye, X. et al., 2014. A pharmacological network for lifespan extension in Caenorhabditis elegans. Aging cell, 13(2), pp.206–215.	NEGATIVE
PD 168,077 maleate	O=C(NCN1CCN(CC1)c1ccccc1C#N)c1cc(ccc1)C	Ye, X. et al., 2014. A pharmacological network for lifespan extension in Caenorhabditis elegans. Aging cell, 13(2), pp.206–215.	NEGATIVE
Semicarbazide hydrochloride	O=C(NN)N	Ye, X. et al., 2014. A pharmacological network for lifespan extension in Caenorhabditis elegans. Aging cell, 13(2), pp.206–215.	NEGATIVE
Iproniazid phosphate	O=C(NNC(C)C)c1ccncc1	Ye, X. et al., 2014. A pharmacological network for lifespan extension in Caenorhabditis elegans. Aging cell, 13(2), pp.206–215.	NEGATIVE
Nialamide	O=C(NNCCC(=O)NCc1ccccc1)c1ccncc1	Ye, X. et al., 2014. A pharmacological network for lifespan extension in Caenorhabditis elegans. Aging cell, 13(2), pp.206–215.	NEGATIVE
Hydroxyurea	O=C(NO)N	Ye, X. et al., 2014. A pharmacological network for lifespan extension in Caenorhabditis elegans. Aging cell, 13(2), pp.206–215.	NEGATIVE
(Z)-Gugglesterone	O=C/1C[C@H]2[C@@H]3[C@@H](CCC2(C)\C\1=C\C)C1(C(=CC(=O)CC1)CC3)C	Ye, X. et al., 2014. A pharmacological network for lifespan extension in Caenorhabditis elegans. Aging cell, 13(2), pp.206–215.	NEGATIVE
SU 5416	O=C/1Nc2c(cccc2)\C\1=C\c1[nH]c(cc1C)C	Ye, X. et al., 2014. A pharmacological network for lifespan extension in Caenorhabditis elegans. Aging cell, 13(2), pp.206–215.	NEGATIVE
5alpha-Pregnan-3alpha-ol-11,20-dione	O=C1[C@@H]2[C@@H]([C@@H]3CC[C@@H](C(=O)C)C3(C1)C)CC[C@H]1C[C@H](O)CCC12C	Ye, X. et al., 2014. A pharmacological network for lifespan extension in Caenorhabditis elegans. Aging cell, 13(2), pp.206–215.	NEGATIVE
AA-861	O=C1C(CCCCC#CCCCC#CCO)=C(C)C(=O)C(C)=C1C	Ye, X. et al., 2014. A pharmacological network for lifespan extension in Caenorhabditis elegans. Aging cell, 13(2), pp.206–215.	NEGATIVE
Me-3,4-dephostatin	O=C1C=C(N(NO)C)C=CC1=O	Ye, X. et al., 2014. A pharmacological network for lifespan extension in Caenorhabditis elegans. Aging cell, 13(2), pp.206–215.	NEGATIVE
Chelidamic acid	O=C1C=C(NC(=C1)C(O)=O)C(O)=O	Ye, X. et al., 2014. A pharmacological network for lifespan extension in Caenorhabditis elegans. Aging cell, 13(2), pp.206–215.	NEGATIVE
Kynurenic acid	O=C1C=C(Nc2c1cccc2)C(O)=O	Ye, X. et al., 2014. A pharmacological network for lifespan extension in Caenorhabditis elegans. Aging cell, 13(2), pp.206–215.	NEGATIVE
U-74389G maleate	O=C1C=C2CC[C@H]3[C@@H]4CC[C@H](C(=O)CN5CCN(CC5)c5nc(nc(N6CCCC6)c5)N5CCCC5)C4(CC=C3C2(C=C1)C)C	Ye, X. et al., 2014. A pharmacological network for lifespan extension in Caenorhabditis elegans. Aging cell, 13(2), pp.206–215.	NEGATIVE
P-Benzoquinone	O=C1C=CC(=O)C=C1	Ye, X. et al., 2014. A pharmacological network for lifespan extension in Caenorhabditis elegans. Aging cell, 13(2), pp.206–215.	NEGATIVE
Dephostatin	O=C1C=CC(=O)C=C1N(NO)C	Ye, X. et al., 2014. A pharmacological network for lifespan extension in Caenorhabditis elegans. Aging cell, 13(2), pp.206–215.	NEGATIVE
SP600125	O=C1c2c(-c3n[nH]c4c3c1ccc4)cccc2	Ye, X. et al., 2014. A pharmacological network for lifespan extension in Caenorhabditis elegans. Aging cell, 13(2), pp.206–215.	NEGATIVE
Nalidixic acid sodium	O=C1c2ccc(nc2N(C=C1C(O)=O)CC)C	Ye, X. et al., 2014. A pharmacological network for lifespan extension in Caenorhabditis elegans. Aging cell, 13(2), pp.206–215.	NEGATIVE
Androsterone	O=C1CC[C@@H]2[C@H]3[C@H](CCC12C)C1([C@H](C[C@H](O)CC1)CC3)C	Ye, X. et al., 2014. A pharmacological network for lifespan extension in Caenorhabditis elegans. Aging cell, 13(2), pp.206–215.	NEGATIVE
loxoprofen	O=C1CCC[C@H]1Cc1ccc(cc1)[C@H](C(O)=O)C	Ye, X. et al., 2014. A pharmacological network for lifespan extension in Caenorhabditis elegans. Aging cell, 13(2), pp.206–215.	NEGATIVE
Corticosterone	O=C1CCC2([C@@H]3[C@H]([C@H]4CC[C@H](C(=O)CO)C4(C[C@@H]3O)C)CCC2=C1)C	Ye, X. et al., 2014. A pharmacological network for lifespan extension in Caenorhabditis elegans. Aging cell, 13(2), pp.206–215.	NEGATIVE
Progesterone	O=C1CCC2([C@H]3[C@@H]([C@@H]4CC[C@@H](C(=O)C)C4(CC3)C)CCC2=C1)C	Ye, X. et al., 2014. A pharmacological network for lifespan extension in Caenorhabditis elegans. Aging cell, 13(2), pp.206–215.	NEGATIVE
L-Glutamic acid, N-phthaloyl-	O=C1N([C@H](CCC(O)=O)C(O)=O)C(=O)c2c1cccc2	Ye, X. et al., 2014. A pharmacological network for lifespan extension in Caenorhabditis elegans. Aging cell, 13(2), pp.206–215.	NEGATIVE
(-)-Cotinine	O=C1N(C)[C@H](CC1)c1cccnc1	Ye, X. et al., 2014. A pharmacological network for lifespan extension in Caenorhabditis elegans. Aging cell, 13(2), pp.206–215.	NEGATIVE
1,3-Dimethyl-8-phenylxanthine	O=C1N(C)C(=O)N(c2nc([nH]c12)-c1ccccc1)C	Ye, X. et al., 2014. A pharmacological network for lifespan extension in Caenorhabditis elegans. Aging cell, 13(2), pp.206–215.	NEGATIVE
8-Cyclopentyl-1,3-dimethylxanthine	O=C1N(C)C(=O)N(c2nc([nH]c12)C1CCCC1)C	Ye, X. et al., 2014. A pharmacological network for lifespan extension in Caenorhabditis elegans. Aging cell, 13(2), pp.206–215.	NEGATIVE
8-Methoxymethyl-3-isobutyl-1-methylxanthine	O=C1N(C)C(=O)N(c2nc([nH]c12)COC)CC(C)C	Ye, X. et al., 2014. A pharmacological network for lifespan extension in Caenorhabditis elegans. Aging cell, 13(2), pp.206–215.	NEGATIVE
Theophylline	O=C1N(C)C(=O)N(c2nc[nH]c12)C	Ye, X. et al., 2014. A pharmacological network for lifespan extension in Caenorhabditis elegans. Aging cell, 13(2), pp.206–215.	NEGATIVE
3-Isobutyl-1-methylxanthine	O=C1N(C)C(=O)N(c2nc[nH]c12)CC(C)C	Ye, X. et al., 2014. A pharmacological network for lifespan extension in Caenorhabditis elegans. Aging cell, 13(2), pp.206–215.	NEGATIVE
1,7-Dimethylxanthine	O=C1N(C)C(=O)Nc2ncn(c12)C	Ye, X. et al., 2014. A pharmacological network for lifespan extension in Caenorhabditis elegans. Aging cell, 13(2), pp.206–215.	NEGATIVE
Oxiracetam	O=C1N(C[C@H](O)C1)CC(=O)N	Ye, X. et al., 2014. A pharmacological network for lifespan extension in Caenorhabditis elegans. Aging cell, 13(2), pp.206–215.	NEGATIVE
Pirfenidone	O=C1N(C=C(C=C1)C)c1ccccc1	Ye, X. et al., 2014. A pharmacological network for lifespan extension in Caenorhabditis elegans. Aging cell, 13(2), pp.206–215.	NEGATIVE
Linopirdine	O=C1N(c2c(cccc2)C1(Cc1ccncc1)Cc1ccncc1)c1ccccc1	Ye, X. et al., 2014. A pharmacological network for lifespan extension in Caenorhabditis elegans. Aging cell, 13(2), pp.206–215.	NEGATIVE
N-Ethylmaleimide	O=C1N(CC)C(=O)C=C1	Ye, X. et al., 2014. A pharmacological network for lifespan extension in Caenorhabditis elegans. Aging cell, 13(2), pp.206–215.	NEGATIVE
3,7-Dimethyl-I-propargylxanthine	O=C1N(CC#C)C(=O)N(c2ncn(c12)C)C	Ye, X. et al., 2014. A pharmacological network for lifespan extension in Caenorhabditis elegans. Aging cell, 13(2), pp.206–215.	NEGATIVE
Xli 093 hydrate	O=C1N(Cc2n(-c3c1cc(cc3)C#C)cnc2C(OCCCOC(=O)c1ncn-2c1CN(C)C(=O)c1cc(ccc1-2)C#C)=O)C	Ye, X. et al., 2014. A pharmacological network for lifespan extension in Caenorhabditis elegans. Aging cell, 13(2), pp.206–215.	NEGATIVE
8-Cyclopentyl-1,3-dipropylxanthine	O=C1N(CCC)C(=O)N(c2nc([nH]c12)C1CCCC1)CCC	Ye, X. et al., 2014. A pharmacological network for lifespan extension in Caenorhabditis elegans. Aging cell, 13(2), pp.206–215.	NEGATIVE
1,3-Dipropyl-7-methylxanthine	O=C1N(CCC)C(=O)N(c2ncn(c12)C)CCC	Ye, X. et al., 2014. A pharmacological network for lifespan extension in Caenorhabditis elegans. Aging cell, 13(2), pp.206–215.	NEGATIVE
WB 64	O=C1N(CCC[N+](CCCCCC[N+](CCCN2C(=O)c3c4c(cccc4ccc3)C2=O)(C)C)(C)C)C(=O)c2c3c1cccc3ccc2	Ye, X. et al., 2014. A pharmacological network for lifespan extension in Caenorhabditis elegans. Aging cell, 13(2), pp.206–215.	NEGATIVE
Piracetam	O=C1N(CCC1)CC(=O)N	Ye, X. et al., 2014. A pharmacological network for lifespan extension in Caenorhabditis elegans. Aging cell, 13(2), pp.206–215.	NEGATIVE
Oxotremorine methiodide	O=C1N(CCC1)CC#CC[N+](C)(C)C	Ye, X. et al., 2014. A pharmacological network for lifespan extension in Caenorhabditis elegans. Aging cell, 13(2), pp.206–215.	NEGATIVE
Oxotremorine sesquifumarate salt	O=C1N(CCC1)CC#CCN1CCCC1	Ye, X. et al., 2014. A pharmacological network for lifespan extension in Caenorhabditis elegans. Aging cell, 13(2), pp.206–215.	NEGATIVE
Pentoxifylline	O=C1N(CCCCC(=O)C)C(=O)N(c2ncn(c12)C)C	Ye, X. et al., 2014. A pharmacological network for lifespan extension in Caenorhabditis elegans. Aging cell, 13(2), pp.206–215.	NEGATIVE
Propentofylline	O=C1N(CCCCC(=O)C)C(=O)N(c2ncn(c12)CCC)C	Ye, X. et al., 2014. A pharmacological network for lifespan extension in Caenorhabditis elegans. Aging cell, 13(2), pp.206–215.	NEGATIVE
Buspirone hydrochloride	O=C1N(CCCCN2CCN(CC2)c2ncccn2)C(=O)CC2(C1)CCCC2	Ye, X. et al., 2014. A pharmacological network for lifespan extension in Caenorhabditis elegans. Aging cell, 13(2), pp.206–215.	NEGATIVE
Sobuzoxane	O=C1N(COC(OCC(C)C)=O)C(=O)CN(C1)CCN1CC(=O)N(COC(OCC(C)C)=O)C(=O)C1	Ye, X. et al., 2014. A pharmacological network for lifespan extension in Caenorhabditis elegans. Aging cell, 13(2), pp.206–215.	NEGATIVE
Phenylbutazone	O=C1N(N(C(=O)C1CCCC)c1ccccc1)c1ccccc1	Ye, X. et al., 2014. A pharmacological network for lifespan extension in Caenorhabditis elegans. Aging cell, 13(2), pp.206–215.	NEGATIVE
(±)-HA-966	O=C1N(O)CC[C@H]1N	Ye, X. et al., 2014. A pharmacological network for lifespan extension in Caenorhabditis elegans. Aging cell, 13(2), pp.206–215.	NEGATIVE
Finasteride	O=C1N[C@@H]2CC[C@H]3[C@@H]4CC[C@H](C(=O)NC(C)(C)C)C4(CC[C@H]3C2(C=C1)C)C	Ye, X. et al., 2014. A pharmacological network for lifespan extension in Caenorhabditis elegans. Aging cell, 13(2), pp.206–215.	NEGATIVE
2,6-Diamino-4-pyrimidinone	O=C1N=C(NC(N)=C1)N	Ye, X. et al., 2014. A pharmacological network for lifespan extension in Caenorhabditis elegans. Aging cell, 13(2), pp.206–215.	NEGATIVE
Isoxanthopterin	O=C1N=C(NC=2NC(=O)C=NC1=2)N	Ye, X. et al., 2014. A pharmacological network for lifespan extension in Caenorhabditis elegans. Aging cell, 13(2), pp.206–215.	NEGATIVE
(6R)-5,6,7,8-Tetrahydro-L-biopterin hydrochloride	O=C1N=C(NC=2NC[C@H](NC1=2)[C@H](O)[C@H](O)C)N	Ye, X. et al., 2014. A pharmacological network for lifespan extension in Caenorhabditis elegans. Aging cell, 13(2), pp.206–215.	NEGATIVE
Sepiapterin	O=C1N=C(NC=2NCC(=NC1=2)C(=O)[C@H](O)C)N	Ye, X. et al., 2014. A pharmacological network for lifespan extension in Caenorhabditis elegans. Aging cell, 13(2), pp.206–215.	NEGATIVE
Ganciclovir	O=C1N=C(Nc2n(cnc12)COC(CO)CO)N	Ye, X. et al., 2014. A pharmacological network for lifespan extension in Caenorhabditis elegans. Aging cell, 13(2), pp.206–215.	NEGATIVE
Acyclovir	O=C1N=C(Nc2n(cnc12)COCCO)N	Ye, X. et al., 2014. A pharmacological network for lifespan extension in Caenorhabditis elegans. Aging cell, 13(2), pp.206–215.	NEGATIVE
Indirubin-3'-oxime	O=C1N=C2C(C=CC=C2)=C1c1[nH]c2c(cccc2)c1NO	Ye, X. et al., 2014. A pharmacological network for lifespan extension in Caenorhabditis elegans. Aging cell, 13(2), pp.206–215.	NEGATIVE
Allopurinol	O=C1N=CN=C2NNC=C12	Ye, X. et al., 2014. A pharmacological network for lifespan extension in Caenorhabditis elegans. Aging cell, 13(2), pp.206–215.	NEGATIVE
Praziquantel	O=C1N2[C@@H](c3c(CC2)cccc3)CN(C1)C(=O)C1CCCCC1	Ye, X. et al., 2014. A pharmacological network for lifespan extension in Caenorhabditis elegans. Aging cell, 13(2), pp.206–215.	NEGATIVE
Rutaecarpine	O=C1N2C(=Nc3c1cccc3)c1[nH]c3c(c1CC2)cccc3	Ye, X. et al., 2014. A pharmacological network for lifespan extension in Caenorhabditis elegans. Aging cell, 13(2), pp.206–215.	NEGATIVE
4-Amino-1,8-naphthalimide	O=C1NC(=O)c2c3c1ccc(N)c3ccc2	Ye, X. et al., 2014. A pharmacological network for lifespan extension in Caenorhabditis elegans. Aging cell, 13(2), pp.206–215.	NEGATIVE
(±)-Thalidomide	O=C1NC(=O)CC[C@H]1N1C(=O)c2c(cccc2)C1=O	Ye, X. et al., 2014. A pharmacological network for lifespan extension in Caenorhabditis elegans. Aging cell, 13(2), pp.206–215.	NEGATIVE
(±)-p-Aminoglutethimide	O=C1NC(=O)CCC1(CC)c1ccc(N)cc1	Ye, X. et al., 2014. A pharmacological network for lifespan extension in Caenorhabditis elegans. Aging cell, 13(2), pp.206–215.	NEGATIVE
S(-)-Willardiine	O=C1NC(=O)N(C=C1)C[C@@H](N)C(O)=O	Ye, X. et al., 2014. A pharmacological network for lifespan extension in Caenorhabditis elegans. Aging cell, 13(2), pp.206–215.	NEGATIVE
3-n-Propylxanthine	O=C1NC(=O)N(c2nc[nH]c12)CCC	Ye, X. et al., 2014. A pharmacological network for lifespan extension in Caenorhabditis elegans. Aging cell, 13(2), pp.206–215.	NEGATIVE
Theobromine	O=C1NC(=O)N(c2ncn(c12)C)C	Ye, X. et al., 2014. A pharmacological network for lifespan extension in Caenorhabditis elegans. Aging cell, 13(2), pp.206–215.	NEGATIVE
5,5-Diphenylhydantoin	O=C1NC(=O)NC1(c1ccccc1)c1ccccc1	Ye, X. et al., 2014. A pharmacological network for lifespan extension in Caenorhabditis elegans. Aging cell, 13(2), pp.206–215.	NEGATIVE
Alloxazine	O=C1NC(=O)Nc2nc3c(nc12)cccc3	Ye, X. et al., 2014. A pharmacological network for lifespan extension in Caenorhabditis elegans. Aging cell, 13(2), pp.206–215.	NEGATIVE
Olprinone hydrochloride	O=C1NC(C)=C(C=C1C#N)C=1C=Cc2n(C=1)ccn2	Ye, X. et al., 2014. A pharmacological network for lifespan extension in Caenorhabditis elegans. Aging cell, 13(2), pp.206–215.	NEGATIVE
Milrinone	O=C1NC(C)=C(C=C1C#N)c1ccncc1	Ye, X. et al., 2014. A pharmacological network for lifespan extension in Caenorhabditis elegans. Aging cell, 13(2), pp.206–215.	NEGATIVE
6(5H)-Phenanthridinone	O=C1Nc2c(-c3c1cccc3)cccc2	Ye, X. et al., 2014. A pharmacological network for lifespan extension in Caenorhabditis elegans. Aging cell, 13(2), pp.206–215.	NEGATIVE
Ropinirole hydrochloride	O=C1Nc2c(C1)c(ccc2)CCN(CCC)CCC	Ye, X. et al., 2014. A pharmacological network for lifespan extension in Caenorhabditis elegans. Aging cell, 13(2), pp.206–215.	NEGATIVE
NS 521 oxalate	O=C1Nc2c(N1C1CCN(CC1)CCCC)cccc2	Ye, X. et al., 2014. A pharmacological network for lifespan extension in Caenorhabditis elegans. Aging cell, 13(2), pp.206–215.	NEGATIVE
DNQX	O=C1Nc2cc([N+](=O)[O-])c([N+](=O)[O-])cc2NC1=O	Ye, X. et al., 2014. A pharmacological network for lifespan extension in Caenorhabditis elegans. Aging cell, 13(2), pp.206–215.	NEGATIVE
Pirenzepine dihydrochloride	O=C1Nc2cccnc2N(c2c1cccc2)C(=O)CN1CCN(CC1)C	Ye, X. et al., 2014. A pharmacological network for lifespan extension in Caenorhabditis elegans. Aging cell, 13(2), pp.206–215.	NEGATIVE
Primidone	O=C1NCNC(=O)C1(CC)c1ccccc1	Ye, X. et al., 2014. A pharmacological network for lifespan extension in Caenorhabditis elegans. Aging cell, 13(2), pp.206–215.	NEGATIVE
SKF 94836	O=C1NN=C([C@@H](C1)C)c1ccc(N\C(=N\C)\NC#N)cc1	Ye, X. et al., 2014. A pharmacological network for lifespan extension in Caenorhabditis elegans. Aging cell, 13(2), pp.206–215.	NEGATIVE
Imazodan	O=C1NN=C(CC1)c1ccc(-n2ccnc2)cc1	Ye, X. et al., 2014. A pharmacological network for lifespan extension in Caenorhabditis elegans. Aging cell, 13(2), pp.206–215.	NEGATIVE
Mevastatin	O1[C@@H](C[C@@H](O)CC1=O)CC[C@@H]1[C@H]2C(C=C[C@@H]1C)=CCC[C@H]2OC(=O)[C@H](CC)C	Ye, X. et al., 2014. A pharmacological network for lifespan extension in Caenorhabditis elegans. Aging cell, 13(2), pp.206–215.	NEGATIVE
Noscapine hydrchloride	O1[C@@H](c2c(c(OC)c(OC)cc2)C1=O)[C@@H]1N(CCc2c1c(OC)c1OCOc1c2)C	Ye, X. et al., 2014. A pharmacological network for lifespan extension in Caenorhabditis elegans. Aging cell, 13(2), pp.206–215.	NEGATIVE
(+)-Hydrastine	O1[C@@H](c2c(c(OC)c(OC)cc2)C1=O)[C@@H]1N(CCc2c1cc1OCOc1c2)C	Ye, X. et al., 2014. A pharmacological network for lifespan extension in Caenorhabditis elegans. Aging cell, 13(2), pp.206–215.	NEGATIVE
(-)-Bicuculline methbromide, 1(S), 9(R)	O1[C@@H](c2c(c3OCOc3cc2)C1=O)[C@@H]1[N+](CCc2c1cc1OCOc1c2)(C)C	Ye, X. et al., 2014. A pharmacological network for lifespan extension in Caenorhabditis elegans. Aging cell, 13(2), pp.206–215.	NEGATIVE
2',3'-dideoxycytidine	O1[C@@H](CC[C@H]1N1C=CC(=NC1=O)N)CO	Ye, X. et al., 2014. A pharmacological network for lifespan extension in Caenorhabditis elegans. Aging cell, 13(2), pp.206–215.	NEGATIVE
A-77636 hydrochloride	O1[C@@H](Cc2c(ccc(O)c2O)[C@H]1CN)C12CC3CC(C1)CC(C2)C3	Ye, X. et al., 2014. A pharmacological network for lifespan extension in Caenorhabditis elegans. Aging cell, 13(2), pp.206–215.	NEGATIVE
Brefeldin A from Penicillium brefeldianum	O1[C@@H](CCC\C=C/[C@@H]2C[C@@H](O)CC2(O)C\C=C/C1=O)C	Ye, X. et al., 2014. A pharmacological network for lifespan extension in Caenorhabditis elegans. Aging cell, 13(2), pp.206–215.	NEGATIVE
(+)-cis-Dioxolane iodide	O1[C@@H](CO[C@H]1C)C[N+](C)(C)C	Ye, X. et al., 2014. A pharmacological network for lifespan extension in Caenorhabditis elegans. Aging cell, 13(2), pp.206–215.	NEGATIVE
Budesonide	O1[C@@H](O[C@@H]2C[C@@H]3[C@H]4[C@@H]([C@@H](O)CC3(C)C12C(=O)CO)C1(C(=CC(=O)C=C1)CC4)C)CCC	Ye, X. et al., 2014. A pharmacological network for lifespan extension in Caenorhabditis elegans. Aging cell, 13(2), pp.206–215.	NEGATIVE
Naloxone benzoylhydrazone	O1[C@@H]\2C34CCN([C@@H](Cc5c3c1c(O)cc5)C4(O)CC/C/2=N\NC(=O)c1ccccc1)CC=C	Ye, X. et al., 2014. A pharmacological network for lifespan extension in Caenorhabditis elegans. Aging cell, 13(2), pp.206–215.	NEGATIVE
(-)-Scopolamine,n-Butyl-, bromide	O1[C@@H]2[C@@H]3[N+]([C@@H]([C@@H]12)CC(OC(=O)[C@H](CO)c1ccccc1)C3)(CCCC)C	Ye, X. et al., 2014. A pharmacological network for lifespan extension in Caenorhabditis elegans. Aging cell, 13(2), pp.206–215.	NEGATIVE
(-)-Scopolamine hydrobromide	O1[C@@H]2[C@@H]3N([C@@H]([C@@H]12)CC(OC(=O)[C@H](CO)c1ccccc1)C3)C	Ye, X. et al., 2014. A pharmacological network for lifespan extension in Caenorhabditis elegans. Aging cell, 13(2), pp.206–215.	NEGATIVE
Taxol	O1[C@@H]2C[C@H](O)C3([C@@H]([C@@H](OC(=O)c4ccccc4)C4(O)C[C@H](OC(=O)[C@@H](O)[C@@H](NC(=O)c5ccccc5)c5ccccc5)C(=C([C@@H](OC(=O)C)C3=O)C4(C)C)C)C2(OC(=O)C)C1)C	Ye, X. et al., 2014. A pharmacological network for lifespan extension in Caenorhabditis elegans. Aging cell, 13(2), pp.206–215.	NEGATIVE
Thapsigargin	O1[C@@H]2C=3[C@@H]([C@@H](OC(=O)CCCCCCC)[C@@H](OC(=O)\C(=C\C)\C)C=3C)C(OC(=O)C)(C[C@H](OC(=O)CCC)C2(O)C(O)(C)C1=O)C	Ye, X. et al., 2014. A pharmacological network for lifespan extension in Caenorhabditis elegans. Aging cell, 13(2), pp.206–215.	NEGATIVE
Nalbuphine hydrochloride	O1[C@@H]2C34CCN([C@@H](Cc5c3c1c(O)cc5)C4(O)CC[C@@H]2O)CC1CCC1	Ye, X. et al., 2014. A pharmacological network for lifespan extension in Caenorhabditis elegans. Aging cell, 13(2), pp.206–215.	NEGATIVE
Naltrindole hydrochloride	O1[C@@H]2C34CCN([C@@H](Cc5c3c1c(O)cc5)C4(O)Cc1c3c([nH]c12)cccc3)CC1CC1	Ye, X. et al., 2014. A pharmacological network for lifespan extension in Caenorhabditis elegans. Aging cell, 13(2), pp.206–215.	NEGATIVE
Naltriben methanesulfonate	O1[C@@H]2C34CCN([C@@H](Cc5c3c1c(O)cc5)C4(O)Cc1c3c(oc12)cccc3)CC1CC1	Ye, X. et al., 2014. A pharmacological network for lifespan extension in Caenorhabditis elegans. Aging cell, 13(2), pp.206–215.	NEGATIVE
Naloxone hydrochloride	O1[C@@H]2C34CCN([C@@H](Cc5c3c1c(O)cc5)C4(O)CCC2=O)CC=C	Ye, X. et al., 2014. A pharmacological network for lifespan extension in Caenorhabditis elegans. Aging cell, 13(2), pp.206–215.	NEGATIVE
Naltrexone hydrochloride	O1[C@@H]2C34CCN([C@@H](Cc5c3c1c(O)cc5)C4(O)CCC2=O)CC1CC1	Ye, X. et al., 2014. A pharmacological network for lifespan extension in Caenorhabditis elegans. Aging cell, 13(2), pp.206–215.	NEGATIVE
Endothall	O1[C@@H]2CC[C@@H]1[C@H](C(O)=O)[C@@H]2C(O)=O	Ye, X. et al., 2014. A pharmacological network for lifespan extension in Caenorhabditis elegans. Aging cell, 13(2), pp.206–215.	NEGATIVE
Ancitabine hydrochloride	O1[C@@H]2N3C=CC(N=C3O[C@H]2[C@@H](O)[C@H]1CO)=N	Ye, X. et al., 2014. A pharmacological network for lifespan extension in Caenorhabditis elegans. Aging cell, 13(2), pp.206–215.	NEGATIVE
Ivermectin	O1[C@H]([C@H](CC)C)[C@H](CCC12O[C@@H]1C\C=C(\C)/[C@@H](O[C@H]3O[C@H](C)[C@H](O[C@H]4O[C@H](C)[C@H](O)[C@H](OC)C4)[C@H](OC)C3)[C@H](\C=C\C=C/3\CO[C@H]4[C@@H](O)C(=C[C@@H](C\34O)C(O[C@H](C2)C1)=O)C)C)C	Ye, X. et al., 2014. A pharmacological network for lifespan extension in Caenorhabditis elegans. Aging cell, 13(2), pp.206–215.	NEGATIVE
E-64	O1[C@H](C(=O)N[C@H](CC(C)C)C(=O)NCCCCN=C(N)N)[C@H]1C(O)=O	Ye, X. et al., 2014. A pharmacological network for lifespan extension in Caenorhabditis elegans. Aging cell, 13(2), pp.206–215.	NEGATIVE
5'-N-Methyl carboxamidoadenosine	O1[C@H](C(=O)NC)[C@@H](O)[C@@H](O)[C@H]1n1c2ncnc(N)c2nc1	Ye, X. et al., 2014. A pharmacological network for lifespan extension in Caenorhabditis elegans. Aging cell, 13(2), pp.206–215.	NEGATIVE
AB-MECA	O1[C@H](C(=O)NC)[C@@H](O)[C@@H](O)[C@H]1n1c2ncnc(NCc3ccc(N)cc3)c2nc1	Ye, X. et al., 2014. A pharmacological network for lifespan extension in Caenorhabditis elegans. Aging cell, 13(2), pp.206–215.	NEGATIVE
CGS-21680 hydrochloride	O1[C@H](C(=O)NCC)[C@@H](O)[C@@H](O)[C@H]1n1c2nc(nc(N)c2nc1)NCCc1ccc(cc1)CCC(O)=O	Ye, X. et al., 2014. A pharmacological network for lifespan extension in Caenorhabditis elegans. Aging cell, 13(2), pp.206–215.	NEGATIVE
5'-N-Ethylcarboxamidoadenosine	O1[C@H](C(=O)NCC)[C@@H](O)[C@@H](O)[C@H]1n1c2ncnc(N)c2nc1	Ye, X. et al., 2014. A pharmacological network for lifespan extension in Caenorhabditis elegans. Aging cell, 13(2), pp.206–215.	NEGATIVE
HE-NECA	O1[C@H](C(=O)NCC)[C@H](O)[C@H](O)[C@H]1n1c2nc(nc(N)c2nc1)C#CCCCC	Ye, X. et al., 2014. A pharmacological network for lifespan extension in Caenorhabditis elegans. Aging cell, 13(2), pp.206–215.	NEGATIVE
Idarubicin	O1[C@H](C)[C@@H](O)[C@@H](N)C[C@H]1O[C@@H]1CC(O)(Cc2c1c(O)c1c(C(=O)c3c(cccc3)C1=O)c2O)C(=O)C	Ye, X. et al., 2014. A pharmacological network for lifespan extension in Caenorhabditis elegans. Aging cell, 13(2), pp.206–215.	NEGATIVE
(±)-Muscarine chloride	O1[C@H](C)[C@@H](O)C[C@H]1C[N+](C)(C)C	Ye, X. et al., 2014. A pharmacological network for lifespan extension in Caenorhabditis elegans. Aging cell, 13(2), pp.206–215.	NEGATIVE
Calcimycin	O1[C@H](Cc2oc3c(n2)c(C(O)=O)c(NC)cc3)[C@@H](CCC12O[C@H]([C@@H](C(=O)c1[nH]ccc1)C)[C@@H](C[C@@H]2C)C)C	Ye, X. et al., 2014. A pharmacological network for lifespan extension in Caenorhabditis elegans. Aging cell, 13(2), pp.206–215.	NEGATIVE
Paromomycin sulfate	O1[C@H](CN)[C@H](O)[C@H](O)[C@H](N)[C@H]1O[C@@H]1[C@H](O)[C@H](O[C@@H]1CO)O[C@H]1[C@@H](O[C@H]2O[C@H](CO)[C@H](O)[C@H](O)[C@@H]2N)[C@H](N)C[C@@H](N)[C@H]1O	Ye, X. et al., 2014. A pharmacological network for lifespan extension in Caenorhabditis elegans. Aging cell, 13(2), pp.206–215.	NEGATIVE
3'-Azido-3'-deoxythymidine	O1[C@H](CO)[C@H](N=[N+]=[N-])C[C@H]1N1C=C(C)C(=O)NC1=O	Ye, X. et al., 2014. A pharmacological network for lifespan extension in Caenorhabditis elegans. Aging cell, 13(2), pp.206–215.	NEGATIVE
Cytosine-1-beta-D-arabinofuranoside hydrochloride	O1[C@H](CO)[C@H](O)[C@H](O)[C@H]1N1C=CC(=NC1=O)N	Ye, X. et al., 2014. A pharmacological network for lifespan extension in Caenorhabditis elegans. Aging cell, 13(2), pp.206–215.	NEGATIVE
5-azacytidine	O1[C@H](CO)[C@H](O)[C@H](O)[C@H]1N1C=NC(=NC1=O)N	Ye, X. et al., 2014. A pharmacological network for lifespan extension in Caenorhabditis elegans. Aging cell, 13(2), pp.206–215.	NEGATIVE
3-deazaadenosine	O1[C@H](CO)[C@H](O)[C@H](O)[C@H]1n1c2c(nc1)c(ncc2)N	Ye, X. et al., 2014. A pharmacological network for lifespan extension in Caenorhabditis elegans. Aging cell, 13(2), pp.206–215.	NEGATIVE
2-Phenylaminoadenosine	O1[C@H](CO)[C@H](O)[C@H](O)[C@H]1n1c2nc(nc(N)c2nc1)Nc1ccccc1	Ye, X. et al., 2014. A pharmacological network for lifespan extension in Caenorhabditis elegans. Aging cell, 13(2), pp.206–215.	NEGATIVE
Adenosine	O1[C@H](CO)[C@H](O)[C@H](O)[C@H]1n1c2ncnc(N)c2nc1	Ye, X. et al., 2014. A pharmacological network for lifespan extension in Caenorhabditis elegans. Aging cell, 13(2), pp.206–215.	NEGATIVE
R(-)-N6-(2-Phenylisopropyl)adenosine	O1[C@H](CO)[C@H](O)[C@H](O)[C@H]1n1c2ncnc(N[C@@H](Cc3ccccc3)C)c2nc1	Ye, X. et al., 2014. A pharmacological network for lifespan extension in Caenorhabditis elegans. Aging cell, 13(2), pp.206–215.	NEGATIVE
(S)-ENBA	O1[C@H](CO)[C@H](O)[C@H](O)[C@H]1n1c2ncnc(N[C@@H]3[C@@H]4CC[C@@H](C3)C4)c2nc1	Ye, X. et al., 2014. A pharmacological network for lifespan extension in Caenorhabditis elegans. Aging cell, 13(2), pp.206–215.	NEGATIVE
GR 79236X	O1[C@H](CO)[C@H](O)[C@H](O)[C@H]1n1c2ncnc(N[C@@H]3CCC[C@@H]3O)c2nc1	Ye, X. et al., 2014. A pharmacological network for lifespan extension in Caenorhabditis elegans. Aging cell, 13(2), pp.206–215.	NEGATIVE
N6-Methyladenosine	O1[C@H](CO)[C@H](O)[C@H](O)[C@H]1n1c2ncnc(NC)c2nc1	Ye, X. et al., 2014. A pharmacological network for lifespan extension in Caenorhabditis elegans. Aging cell, 13(2), pp.206–215.	NEGATIVE
N6-Cyclopentyladenosine	O1[C@H](CO)[C@H](O)[C@H](O)[C@H]1n1c2ncnc(NC3CCCC3)c2nc1	Ye, X. et al., 2014. A pharmacological network for lifespan extension in Caenorhabditis elegans. Aging cell, 13(2), pp.206–215.	NEGATIVE
N6-Cyclohexyladenosine	O1[C@H](CO)[C@H](O)[C@H](O)[C@H]1n1c2ncnc(NC3CCCCC3)c2nc1	Ye, X. et al., 2014. A pharmacological network for lifespan extension in Caenorhabditis elegans. Aging cell, 13(2), pp.206–215.	NEGATIVE
N6-Phenyladenosine	O1[C@H](CO)[C@H](O)[C@H](O)[C@H]1n1c2ncnc(Nc3ccccc3)c2nc1	Ye, X. et al., 2014. A pharmacological network for lifespan extension in Caenorhabditis elegans. Aging cell, 13(2), pp.206–215.	NEGATIVE
Metrifudil	O1[C@H](CO)[C@H](O)[C@H](O)[C@H]1n1c2ncnc(NCc3ccccc3C)c2nc1	Ye, X. et al., 2014. A pharmacological network for lifespan extension in Caenorhabditis elegans. Aging cell, 13(2), pp.206–215.	NEGATIVE
N6-2-(4-Aminophenyl)ethyladenosine	O1[C@H](CO)[C@H](O)[C@H](O)[C@H]1n1c2ncnc(NCCc3ccc(N)cc3)c2nc1	Ye, X. et al., 2014. A pharmacological network for lifespan extension in Caenorhabditis elegans. Aging cell, 13(2), pp.206–215.	NEGATIVE
N6-2-Phenylethyladenosine	O1[C@H](CO)[C@H](O)[C@H](O)[C@H]1n1c2ncnc(NCCc3ccccc3)c2nc1	Ye, X. et al., 2014. A pharmacological network for lifespan extension in Caenorhabditis elegans. Aging cell, 13(2), pp.206–215.	NEGATIVE
Mizoribine	O1[C@H](CO)[C@H](O)[C@H](O)[C@H]1n1cnc(C(=O)N)c1O	Ye, X. et al., 2014. A pharmacological network for lifespan extension in Caenorhabditis elegans. Aging cell, 13(2), pp.206–215.	NEGATIVE
Wortmannin	O1[C@H](COC)C2(C3=C([C@H]4CCC(=O)C4(C[C@H]3OC(=O)C)C)C(=O)c3occ(c23)C1=O)C	Ye, X. et al., 2014. A pharmacological network for lifespan extension in Caenorhabditis elegans. Aging cell, 13(2), pp.206–215.	NEGATIVE
Naloxonazine dihydrochloride	O1[C@H]\2C34CCN([C@@H](Cc5c3c1c(O)cc5)C4(O)CC/C/2=N\N=C/1\[C@@H]2Oc3c4C25CCN([C@@H](Cc4ccc3O)C5(O)CC\1)CC=C)CC=C	Ye, X. et al., 2014. A pharmacological network for lifespan extension in Caenorhabditis elegans. Aging cell, 13(2), pp.206–215.	NEGATIVE
Amiprilose hydrochloride	O1[C@H]2[C@@H](OC1(C)C)O[C@H]([C@@H](O)CO)[C@@H]2OCCCN(C)C	Ye, X. et al., 2014. A pharmacological network for lifespan extension in Caenorhabditis elegans. Aging cell, 13(2), pp.206–215.	NEGATIVE
Parthenolide	O1[C@H]2[C@H](CC\C(=C/CCC3(O[C@H]23)C)\C)C(=C)C1=O	Ye, X. et al., 2014. A pharmacological network for lifespan extension in Caenorhabditis elegans. Aging cell, 13(2), pp.206–215.	NEGATIVE
Nor-Binaltorphimine dihydrochloride	O1[C@H]2C34CCN([C@@H](Cc5c3c1c(O)cc5)C4(O)Cc1c3CC4(O)[C@H]5N(CCC46[C@@H](Oc4c6c(C5)ccc4O)c3[nH]c12)CC1CC1)CC1CC1	Ye, X. et al., 2014. A pharmacological network for lifespan extension in Caenorhabditis elegans. Aging cell, 13(2), pp.206–215.	NEGATIVE
(-)-3-Methoxynaltrexone hydrochloride	O1[C@H]2C34CCN([C@H](Cc5c3c1c(OC)cc5)C4(O)CCC2=O)CC1CC1	Ye, X. et al., 2014. A pharmacological network for lifespan extension in Caenorhabditis elegans. Aging cell, 13(2), pp.206–215.	NEGATIVE
Cantharidic Acid	O1[C@H]2CC[C@@H]1C(C(O)=O)(C)C2(C(O)=O)C	Ye, X. et al., 2014. A pharmacological network for lifespan extension in Caenorhabditis elegans. Aging cell, 13(2), pp.206–215.	NEGATIVE
3-Morpholinosydnonimine hydrochloride	O1[N-][N+](N2CCOCC2)=CC1=N	Ye, X. et al., 2014. A pharmacological network for lifespan extension in Caenorhabditis elegans. Aging cell, 13(2), pp.206–215.	NEGATIVE
Hispidin	O1C(=CC(O)=CC1=O)\C=C\c1cc(O)c(O)cc1	Ye, X. et al., 2014. A pharmacological network for lifespan extension in Caenorhabditis elegans. Aging cell, 13(2), pp.206–215.	NEGATIVE
Norcantharidin	O1C(=O)[C@H]2[C@H]([C@@H]3O[C@@H]2CC3)C1=O	Ye, X. et al., 2014. A pharmacological network for lifespan extension in Caenorhabditis elegans. Aging cell, 13(2), pp.206–215.	NEGATIVE
Cantharidin	O1C(=O)C2([C@H]3O[C@H](CC3)C2(C)C1=O)C	Ye, X. et al., 2014. A pharmacological network for lifespan extension in Caenorhabditis elegans. Aging cell, 13(2), pp.206–215.	NEGATIVE
Oxaprozin	o1c(c(nc1CCC(O)=O)-c1ccccc1)-c1ccccc1	Ye, X. et al., 2014. A pharmacological network for lifespan extension in Caenorhabditis elegans. Aging cell, 13(2), pp.206–215.	NEGATIVE
Dantrolene sodium	o1c(ccc1\C=N\N1CC(=O)N=C1O)-c1ccc([N+](=O)[O-])cc1	Ye, X. et al., 2014. A pharmacological network for lifespan extension in Caenorhabditis elegans. Aging cell, 13(2), pp.206–215.	NEGATIVE
YC-1	o1c(ccc1CO)-c1nn(c2c1cccc2)Cc1ccccc1	Ye, X. et al., 2014. A pharmacological network for lifespan extension in Caenorhabditis elegans. Aging cell, 13(2), pp.206–215.	NEGATIVE
Dihydroouabain	O1C[C@@H](CC1=O)[C@@H]1CCC2(O)[C@@H]3[C@H]([C@@H](O)CC12C)C1(CO)[C@H](O)C[C@@H](O[C@H]2O[C@H](C)[C@@H](O)[C@@H](O)[C@H]2O)CC1(O)CC3	Ye, X. et al., 2014. A pharmacological network for lifespan extension in Caenorhabditis elegans. Aging cell, 13(2), pp.206–215.	NEGATIVE
Etoposide	O1C[C@@H]2[C@@H]([C@H](c3c(cc4OCOc4c3)[C@@H]2O[C@H]2O[C@H]3[C@H](O[C@@H](OC3)C)[C@@H](O)[C@H]2O)c2cc(OC)c(O)c(OC)c2)C1=O	Ye, X. et al., 2014. A pharmacological network for lifespan extension in Caenorhabditis elegans. Aging cell, 13(2), pp.206–215.	NEGATIVE
Pilocarpine nitrate	O1C[C@H](Cc2n(cnc2)C)[C@@H](CC)C1=O	Ye, X. et al., 2014. A pharmacological network for lifespan extension in Caenorhabditis elegans. Aging cell, 13(2), pp.206–215.	NEGATIVE
Podophyllotoxin	O1C[C@H]2[C@@H]([C@H](c3c(cc4OCOc4c3)[C@@H]2O)c2cc(OC)c(OC)c(OC)c2)C1=O	Ye, X. et al., 2014. A pharmacological network for lifespan extension in Caenorhabditis elegans. Aging cell, 13(2), pp.206–215.	NEGATIVE
Daidzein	O1C=C(C(=O)c2c1cc(O)cc2)c1ccc(O)cc1	Ye, X. et al., 2014. A pharmacological network for lifespan extension in Caenorhabditis elegans. Aging cell, 13(2), pp.206–215.	NEGATIVE
Forskolin	O1C2(C)[C@H](OC(=O)C)[C@@H](O)[C@H]3C(C)([C@H](O)CCC3(C)C)C2(O)C(=O)CC1(C=C)C	Ye, X. et al., 2014. A pharmacological network for lifespan extension in Caenorhabditis elegans. Aging cell, 13(2), pp.206–215.	NEGATIVE
Fenspiride hydrochloride	O1C2(CCN(CC2)CCc2ccccc2)CNC1=O	Ye, X. et al., 2014. A pharmacological network for lifespan extension in Caenorhabditis elegans. Aging cell, 13(2), pp.206–215.	NEGATIVE
Beta-Lapachone	O1C2=C(CCC1(C)C)C(=O)C(=O)c1c2cccc1	Ye, X. et al., 2014. A pharmacological network for lifespan extension in Caenorhabditis elegans. Aging cell, 13(2), pp.206–215.	NEGATIVE
(±)-PD 128,907 hydrochloride	O1c2c([C@H]3OCCN([C@@H]3C1)CCC)cc(O)cc2	Ye, X. et al., 2014. A pharmacological network for lifespan extension in Caenorhabditis elegans. Aging cell, 13(2), pp.206–215.	NEGATIVE
Morin	O1c2c(C(=O)C(O)=C1c1ccc(O)cc1O)c(O)cc(O)c2	Ye, X. et al., 2014. A pharmacological network for lifespan extension in Caenorhabditis elegans. Aging cell, 13(2), pp.206–215.	NEGATIVE
Apigenin	O1c2c(C(=O)C=C1c1ccc(O)cc1)c(O)cc(O)c2	Ye, X. et al., 2014. A pharmacological network for lifespan extension in Caenorhabditis elegans. Aging cell, 13(2), pp.206–215.	NEGATIVE
Rottlerin	O1c2c(C=CC1(C)C)c(O)c(Cc1c(O)c(C(=O)C)c(O)c(C)c1O)c(O)c2C(=O)\C=C\c1ccccc1	Ye, X. et al., 2014. A pharmacological network for lifespan extension in Caenorhabditis elegans. Aging cell, 13(2), pp.206–215.	NEGATIVE
Daphnetin	O1c2c(C=CC1=O)ccc(O)c2O	Ye, X. et al., 2014. A pharmacological network for lifespan extension in Caenorhabditis elegans. Aging cell, 13(2), pp.206–215.	NEGATIVE
MK-912	o1c2c(c3CCN4[C@@H](CC5(N(C)C(=O)N(CC5)C)CC4)c13)cccc2	Ye, X. et al., 2014. A pharmacological network for lifespan extension in Caenorhabditis elegans. Aging cell, 13(2), pp.206–215.	NEGATIVE
Furegrelate sodium	o1c2c(cc(cc2)Cc2cccnc2)cc1C(O)=O	Ye, X. et al., 2014. A pharmacological network for lifespan extension in Caenorhabditis elegans. Aging cell, 13(2), pp.206–215.	NEGATIVE
6-Nitroso-1,2-benzopyrone	O1c2c(cc(N=O)cc2)C=CC1=O	Ye, X. et al., 2014. A pharmacological network for lifespan extension in Caenorhabditis elegans. Aging cell, 13(2), pp.206–215.	NEGATIVE
Efaroxan hydrochloride	O1c2c(CC1(CC)C=1NCCN=1)cccc2	Ye, X. et al., 2014. A pharmacological network for lifespan extension in Caenorhabditis elegans. Aging cell, 13(2), pp.206–215.	NEGATIVE
CPCCOEt	O1c2c(cccc2)/C(=N/O)/[C@H]2CC12C(OCC)=O	Ye, X. et al., 2014. A pharmacological network for lifespan extension in Caenorhabditis elegans. Aging cell, 13(2), pp.206–215.	NEGATIVE
PD 98,059	O1c2c(cccc2)C(=O)C=C1c1cccc(OC)c1N	Ye, X. et al., 2014. A pharmacological network for lifespan extension in Caenorhabditis elegans. Aging cell, 13(2), pp.206–215.	NEGATIVE
Propantheline bromide	O1c2c(cccc2)C(c2c1cccc2)C(OCC[N+](C(C)C)(C(C)C)C)=O	Ye, X. et al., 2014. A pharmacological network for lifespan extension in Caenorhabditis elegans. Aging cell, 13(2), pp.206–215.	NEGATIVE
Idazoxan hydrochloride	O1c2c(OC[C@H]1C=1NCCN=1)cccc2	Ye, X. et al., 2014. A pharmacological network for lifespan extension in Caenorhabditis elegans. Aging cell, 13(2), pp.206–215.	NEGATIVE
Imiloxan hydrochloride	O1c2c(OC[C@H]1Cc1nccn1CC)cccc2	Ye, X. et al., 2014. A pharmacological network for lifespan extension in Caenorhabditis elegans. Aging cell, 13(2), pp.206–215.	NEGATIVE
Spiroxatrine	O1c2c(OC[C@H]1CN1CCC3(N(CNC3=O)c3ccccc3)CC1)cccc2	Ye, X. et al., 2014. A pharmacological network for lifespan extension in Caenorhabditis elegans. Aging cell, 13(2), pp.206–215.	NEGATIVE
WB-4101 hydrochloride	O1c2c(OC[C@H]1CNCCOc1c(OC)cccc1OC)cccc2	Ye, X. et al., 2014. A pharmacological network for lifespan extension in Caenorhabditis elegans. Aging cell, 13(2), pp.206–215.	NEGATIVE
Chelerythrine chloride	O1c2c(OC1)cc1c(c3[n+](cc4c(c3cc1)ccc(OC)c4OC)C)c2	Ye, X. et al., 2014. A pharmacological network for lifespan extension in Caenorhabditis elegans. Aging cell, 13(2), pp.206–215.	NEGATIVE
GYKI 52466 hydrochloride	O1c2c(OC1)cc1CC(=NN=C(c1c2)c1ccc(N)cc1)C	Ye, X. et al., 2014. A pharmacological network for lifespan extension in Caenorhabditis elegans. Aging cell, 13(2), pp.206–215.	NEGATIVE
Oxolinic acid	O1c2c(OC1)cc1N(C=C(C(O)=O)C(=O)c1c2)CC	Ye, X. et al., 2014. A pharmacological network for lifespan extension in Caenorhabditis elegans. Aging cell, 13(2), pp.206–215.	NEGATIVE
Cinoxacin	O1c2c(OC1)cc1N(N=C(C(O)=O)C(=O)c1c2)CC	Ye, X. et al., 2014. A pharmacological network for lifespan extension in Caenorhabditis elegans. Aging cell, 13(2), pp.206–215.	NEGATIVE
RX 821002 hydrochloride	O1c2c(OCC1(OC)C=1NCCN=1)cccc2	Ye, X. et al., 2014. A pharmacological network for lifespan extension in Caenorhabditis elegans. Aging cell, 13(2), pp.206–215.	NEGATIVE
S15535	O1c2c(OCC1)cccc2N1CCN(CC1)C1Cc2c(C1)cccc2	Ye, X. et al., 2014. A pharmacological network for lifespan extension in Caenorhabditis elegans. Aging cell, 13(2), pp.206–215.	NEGATIVE
Sanguinarine chloride	O1c2c3c(c4c([n+](c3)C)c3c(cc5OCOc5c3)cc4)ccc2OC1	Ye, X. et al., 2014. A pharmacological network for lifespan extension in Caenorhabditis elegans. Aging cell, 13(2), pp.206–215.	NEGATIVE
Piribedil maleate	O1c2cc(ccc2OC1)CN1CCN(CC1)c1ncccn1	Ye, X. et al., 2014. A pharmacological network for lifespan extension in Caenorhabditis elegans. Aging cell, 13(2), pp.206–215.	NEGATIVE
B-HT 933 dihydrochloride	o1c2CCN(CCc2nc1N)CC	Ye, X. et al., 2014. A pharmacological network for lifespan extension in Caenorhabditis elegans. Aging cell, 13(2), pp.206–215.	NEGATIVE
Ouabain	O1CC(=CC1=O)[C@@H]1CCC2(O)[C@@H]3[C@H]([C@@H](O)CC12C)C1(CO)[C@H](O)C[C@@H](O[C@H]2O[C@H](C)[C@@H](O)[C@@H](O)[C@H]2O)CC1(O)CC3	Ye, X. et al., 2014. A pharmacological network for lifespan extension in Caenorhabditis elegans. Aging cell, 13(2), pp.206–215.	NEGATIVE
Hemicholinium-3	O1CC[N+](CC1(O)c1ccc(cc1)-c1ccc(cc1)C1(OCC[N+](C1)(C)C)O)(C)C	Ye, X. et al., 2014. A pharmacological network for lifespan extension in Caenorhabditis elegans. Aging cell, 13(2), pp.206–215.	NEGATIVE
(S)-(+)-Camptothecin	O1CC2=C(C=C3N(Cc4c3nc3c(c4)cccc3)C2=O)C(O)(CC)C1=O	Ye, X. et al., 2014. A pharmacological network for lifespan extension in Caenorhabditis elegans. Aging cell, 13(2), pp.206–215.	NEGATIVE
Dihydro-beta-erythroidine hydrobromide	O1CC2=C(CC1=O)C13N(CCC1=CC[C@@H](OC)C3)CC2	Ye, X. et al., 2014. A pharmacological network for lifespan extension in Caenorhabditis elegans. Aging cell, 13(2), pp.206–215.	NEGATIVE
Doxepin hydrochloride	O1Cc2c(cccc2)\C(\c2c1cccc2)=C\CCN(C)C	Ye, X. et al., 2014. A pharmacological network for lifespan extension in Caenorhabditis elegans. Aging cell, 13(2), pp.206–215.	NEGATIVE
Terazosin hydrochloride	O1CCC[C@H]1C(=O)N1CCN(CC1)c1nc(N)c2cc(OC)c(OC)cc2n1	Ye, X. et al., 2014. A pharmacological network for lifespan extension in Caenorhabditis elegans. Aging cell, 13(2), pp.206–215.	NEGATIVE
SQ 22536	O1CCC[C@H]1n1c2ncnc(N)c2nc1	Ye, X. et al., 2014. A pharmacological network for lifespan extension in Caenorhabditis elegans. Aging cell, 13(2), pp.206–215.	NEGATIVE
Etodolac	O1CCc2c([nH]c3c2cccc3CC)C1(CC(O)=O)CC	Ye, X. et al., 2014. A pharmacological network for lifespan extension in Caenorhabditis elegans. Aging cell, 13(2), pp.206–215.	NEGATIVE
Prazosin hydrochloride	o1cccc1C(=O)N1CCN(CC1)c1nc(N)c2cc(OC)c(OC)cc2n1	Ye, X. et al., 2014. A pharmacological network for lifespan extension in Caenorhabditis elegans. Aging cell, 13(2), pp.206–215.	NEGATIVE
Furafylline	o1cccc1CN1c2nc([nH]c2C(=O)N(C)C1=O)C	Ye, X. et al., 2014. A pharmacological network for lifespan extension in Caenorhabditis elegans. Aging cell, 13(2), pp.206–215.	NEGATIVE
PNU-37887A	O1CCN(CC1)/C(=N\C1CCCCC1)/NC12CC3CC(C1)CC(C2)C3	Ye, X. et al., 2014. A pharmacological network for lifespan extension in Caenorhabditis elegans. Aging cell, 13(2), pp.206–215.	NEGATIVE
Xamoterol hemifumarate	O1CCN(CC1)C(=O)NCCNC[C@@H](O)COc1ccc(O)cc1	Ye, X. et al., 2014. A pharmacological network for lifespan extension in Caenorhabditis elegans. Aging cell, 13(2), pp.206–215.	NEGATIVE
Molindone hydrochloride	O1CCN(CC1)C[C@H]1CCc2[nH]c(C)c(c2C1=O)CC	Ye, X. et al., 2014. A pharmacological network for lifespan extension in Caenorhabditis elegans. Aging cell, 13(2), pp.206–215.	NEGATIVE
PRE-084	O1CCN(CC1)CCOC(=O)C1(CCCCC1)c1ccccc1	Ye, X. et al., 2014. A pharmacological network for lifespan extension in Caenorhabditis elegans. Aging cell, 13(2), pp.206–215.	NEGATIVE
Rilmenidine hemifumarate	O1CCN=C1NC(C1CC1)C1CC1	Ye, X. et al., 2014. A pharmacological network for lifespan extension in Caenorhabditis elegans. Aging cell, 13(2), pp.206–215.	NEGATIVE
CX 546	O1CCOc2c1cc(cc2)C(=O)N1CCCCC1	Ye, X. et al., 2014. A pharmacological network for lifespan extension in Caenorhabditis elegans. Aging cell, 13(2), pp.206–215.	NEGATIVE
(+)-Quisqualic acid	O1N(C[C@@H](N)C(O)=O)C(=O)NC1=O	Ye, X. et al., 2014. A pharmacological network for lifespan extension in Caenorhabditis elegans. Aging cell, 13(2), pp.206–215.	NEGATIVE
Molsidomine	o1n[n+](N2CCOCC2)cc1\N=C(\OCC)/[O-]	Ye, X. et al., 2014. A pharmacological network for lifespan extension in Caenorhabditis elegans. Aging cell, 13(2), pp.206–215.	NEGATIVE
ODQ	O1N=C2N(c3c(N=C2)cccc3)C1=O	Ye, X. et al., 2014. A pharmacological network for lifespan extension in Caenorhabditis elegans. Aging cell, 13(2), pp.206–215.	NEGATIVE
(±)-AMPA hydrobromide	O1NC(=O)C(C[C@@H](N)C(O)=O)=C1C	Ye, X. et al., 2014. A pharmacological network for lifespan extension in Caenorhabditis elegans. Aging cell, 13(2), pp.206–215.	NEGATIVE
ATPA	O1NC(=O)C(C[C@@H](N)C(O)=O)=C1C(C)(C)C	Ye, X. et al., 2014. A pharmacological network for lifespan extension in Caenorhabditis elegans. Aging cell, 13(2), pp.206–215.	NEGATIVE
THIP hydrochloride	O1NC(=O)C=2CCNCC1=2	Ye, X. et al., 2014. A pharmacological network for lifespan extension in Caenorhabditis elegans. Aging cell, 13(2), pp.206–215.	NEGATIVE
(±)-Ibotenic acid	O1NC(=O)C=C1[C@@H](N)C(O)=O	Ye, X. et al., 2014. A pharmacological network for lifespan extension in Caenorhabditis elegans. Aging cell, 13(2), pp.206–215.	NEGATIVE
Muscimol hydrobromide	O1NC(=O)C=C1CN	Ye, X. et al., 2014. A pharmacological network for lifespan extension in Caenorhabditis elegans. Aging cell, 13(2), pp.206–215.	NEGATIVE
SB 224289 hydrochloride	o1nc(nc1C)-c1cc(C)c(cc1)-c1ccc(cc1)C(=O)N1CCc2c1cc1c(OCC13CCN(CC3)C)c2	Ye, X. et al., 2014. A pharmacological network for lifespan extension in Caenorhabditis elegans. Aging cell, 13(2), pp.206–215.	NEGATIVE
GR 127935 hydrochloride	o1nc(nc1C)-c1cc(C)c(cc1)-c1ccc(cc1)C(=O)Nc1cc(N2CCN(CC2)C)c(OC)cc1	Ye, X. et al., 2014. A pharmacological network for lifespan extension in Caenorhabditis elegans. Aging cell, 13(2), pp.206–215.	NEGATIVE
Bestatin hydrochloride	CC(C)C[C@@H](C(=O)O)NC(=O)[C@H]([C@@H](CC1=CC=CC=C1)N)O	Ye, X. et al., 2014. A pharmacological network for lifespan extension in Caenorhabditis elegans. Aging cell, 13(2), pp.206–215.	NEGATIVE
(2S,1'S,2'S)-2-(carboxycyclopropyl)glycine	OC(=O)[C@@H]1C[C@H]1[C@@H](N)C(O)=O	Ye, X. et al., 2014. A pharmacological network for lifespan extension in Caenorhabditis elegans. Aging cell, 13(2), pp.206–215.	NEGATIVE
SKF 89976A hydrochloride	OC(=O)[C@@H]1CCCN(C1)CCC=C(c1ccccc1)c1ccccc1	Ye, X. et al., 2014. A pharmacological network for lifespan extension in Caenorhabditis elegans. Aging cell, 13(2), pp.206–215.	NEGATIVE
(±)-cis-Piperidine-2,3-dicarboxylic acid	OC(=O)[C@@H]1CCCN[C@@H]1C(O)=O	Ye, X. et al., 2014. A pharmacological network for lifespan extension in Caenorhabditis elegans. Aging cell, 13(2), pp.206–215.	NEGATIVE
(±)-Nipecotic acid	OC(=O)[C@@H]1CCCNC1	Ye, X. et al., 2014. A pharmacological network for lifespan extension in Caenorhabditis elegans. Aging cell, 13(2), pp.206–215.	NEGATIVE
Ketorolac tris salt	OC(=O)[C@@H]1CCn2c1ccc2C(=O)c1ccccc1	Ye, X. et al., 2014. A pharmacological network for lifespan extension in Caenorhabditis elegans. Aging cell, 13(2), pp.206–215.	NEGATIVE
Kainic acid	OC(=O)[C@@H]1NC[C@@H](C(C)=C)[C@H]1CC(O)=O	Ye, X. et al., 2014. A pharmacological network for lifespan extension in Caenorhabditis elegans. Aging cell, 13(2), pp.206–215.	NEGATIVE
Dihydrokainic acid	OC(=O)[C@@H]1NC[C@@H](C(C)C)[C@H]1CC(O)=O	Ye, X. et al., 2014. A pharmacological network for lifespan extension in Caenorhabditis elegans. Aging cell, 13(2), pp.206–215.	NEGATIVE
Ketoprofen	OC(=O)[C@H](C)c1cc(ccc1)C(=O)c1ccccc1	Ye, X. et al., 2014. A pharmacological network for lifespan extension in Caenorhabditis elegans. Aging cell, 13(2), pp.206–215.	NEGATIVE
DL-threo-beta-hydroxyaspartic acid	OC(=O)[C@H](N)[C@@H](O)C(O)=O	Ye, X. et al., 2014. A pharmacological network for lifespan extension in Caenorhabditis elegans. Aging cell, 13(2), pp.206–215.	NEGATIVE
L-allylglycine	OC(=O)[C@H](N)CC=C	Ye, X. et al., 2014. A pharmacological network for lifespan extension in Caenorhabditis elegans. Aging cell, 13(2), pp.206–215.	NEGATIVE
L-Glutamine	OC(=O)[C@H](N)CCC(=O)N	Ye, X. et al., 2014. A pharmacological network for lifespan extension in Caenorhabditis elegans. Aging cell, 13(2), pp.206–215.	NEGATIVE
N^G,N^G-Dimethylarginine hydrochloride	OC(=O)[C@H](N)CCC\N=C(\N(C)C)/N	Ye, X. et al., 2014. A pharmacological network for lifespan extension in Caenorhabditis elegans. Aging cell, 13(2), pp.206–215.	NEGATIVE
NG-Nitro-L-arginine	OC(=O)[C@H](N)CCC\N=C(\N[N+](=O)[O-])/N	Ye, X. et al., 2014. A pharmacological network for lifespan extension in Caenorhabditis elegans. Aging cell, 13(2), pp.206–215.	NEGATIVE
NG-Hydroxy-L-arginine acetate	OC(=O)[C@H](N)CCC\N=C(\NO)/N	Ye, X. et al., 2014. A pharmacological network for lifespan extension in Caenorhabditis elegans. Aging cell, 13(2), pp.206–215.	NEGATIVE
L-N6-(1-Iminoethyl)lysine hydrochloride	OC(=O)[C@H](N)CCCC\N=C(/N)\C	Ye, X. et al., 2014. A pharmacological network for lifespan extension in Caenorhabditis elegans. Aging cell, 13(2), pp.206–215.	NEGATIVE
NG-Monomethyl-L-arginine acetate	OC(=O)[C@H](N)CCCN\C(=N\C)\N	Ye, X. et al., 2014. A pharmacological network for lifespan extension in Caenorhabditis elegans. Aging cell, 13(2), pp.206–215.	NEGATIVE
L-Arginine	OC(=O)[C@H](N)CCCN=C(N)N	Ye, X. et al., 2014. A pharmacological network for lifespan extension in Caenorhabditis elegans. Aging cell, 13(2), pp.206–215.	NEGATIVE
D-Serine	OC(=O)[C@H](N)CO	Ye, X. et al., 2014. A pharmacological network for lifespan extension in Caenorhabditis elegans. Aging cell, 13(2), pp.206–215.	NEGATIVE
S-(+)-PD 123177 trifluoroacetate salt hydrate	OC(=O)[C@H]1N(Cc2ncn(c2C1)Cc1cc(C)c(N)cc1)C(=O)C(c1ccccc1)c1ccccc1	Ye, X. et al., 2014. A pharmacological network for lifespan extension in Caenorhabditis elegans. Aging cell, 13(2), pp.206–215.	NEGATIVE
N-Succinyl-L-proline	OC(=O)[C@H]1N(CCC1)C(=O)CCC(O)=O	Ye, X. et al., 2014. A pharmacological network for lifespan extension in Caenorhabditis elegans. Aging cell, 13(2), pp.206–215.	NEGATIVE
Trans-Azetidine-2,4-dicarboxylic acid	OC(=O)[C@H]1N[C@@H](C1)C(O)=O	Ye, X. et al., 2014. A pharmacological network for lifespan extension in Caenorhabditis elegans. Aging cell, 13(2), pp.206–215.	NEGATIVE
L-azetidine-2-carboxylic acid	OC(=O)[C@H]1NCC1	Ye, X. et al., 2014. A pharmacological network for lifespan extension in Caenorhabditis elegans. Aging cell, 13(2), pp.206–215.	NEGATIVE
Retinoic acid	OC(=O)\C=C(\C=C\C=C(\C=C\C=1C(CCCC=1C)(C)C)/C)/C	Ye, X. et al., 2014. A pharmacological network for lifespan extension in Caenorhabditis elegans. Aging cell, 13(2), pp.206–215.	NEGATIVE
Sodium Oxamate	OC(=O)C(=O)N	Ye, X. et al., 2014. A pharmacological network for lifespan extension in Caenorhabditis elegans. Aging cell, 13(2), pp.206–215.	NEGATIVE
CR 2945	OC(=O)C[C@@H](CC(=O)Nc1c(cc(cc1C)C)C(=O)N1CCC2(CCCC2)CC1)c1c2c(ccc1)cccc2	Ye, X. et al., 2014. A pharmacological network for lifespan extension in Caenorhabditis elegans. Aging cell, 13(2), pp.206–215.	NEGATIVE
N-Methyl-D-aspartic acid	OC(=O)C[C@@H](NC)C(O)=O	Ye, X. et al., 2014. A pharmacological network for lifespan extension in Caenorhabditis elegans. Aging cell, 13(2), pp.206–215.	NEGATIVE
Gabaculine hydrochloride	OC(=O)C=1C[C@@H](N)C=CC=1	Ye, X. et al., 2014. A pharmacological network for lifespan extension in Caenorhabditis elegans. Aging cell, 13(2), pp.206–215.	NEGATIVE
(-)-Perillic acid	OC(=O)C=1CC[C@H](CC=1)C(C)=C	Ye, X. et al., 2014. A pharmacological network for lifespan extension in Caenorhabditis elegans. Aging cell, 13(2), pp.206–215.	NEGATIVE
Isoguvacine hydrochloride	OC(=O)C=1CCNCC=1	Ye, X. et al., 2014. A pharmacological network for lifespan extension in Caenorhabditis elegans. Aging cell, 13(2), pp.206–215.	NEGATIVE
Guvacine hydrochloride	OC(=O)C=1CNCCC=1	Ye, X. et al., 2014. A pharmacological network for lifespan extension in Caenorhabditis elegans. Aging cell, 13(2), pp.206–215.	NEGATIVE
Trans-(±)-ACPD	OC(=O)C1(N)C[C@@H](CC1)C(O)=O	Ye, X. et al., 2014. A pharmacological network for lifespan extension in Caenorhabditis elegans. Aging cell, 13(2), pp.206–215.	NEGATIVE
1-Aminocyclopropanecarboxylic acid hydrochloride	OC(=O)C1(N)CC1	Ye, X. et al., 2014. A pharmacological network for lifespan extension in Caenorhabditis elegans. Aging cell, 13(2), pp.206–215.	NEGATIVE
AIDA	OC(=O)C1(N)CCc2c1ccc(c2)C(O)=O	Ye, X. et al., 2014. A pharmacological network for lifespan extension in Caenorhabditis elegans. Aging cell, 13(2), pp.206–215.	NEGATIVE
1-Amino-1-cyclohexanecarboxylic acid hydrochloride	OC(=O)C1(N)CCCCC1	Ye, X. et al., 2014. A pharmacological network for lifespan extension in Caenorhabditis elegans. Aging cell, 13(2), pp.206–215.	NEGATIVE
5-Nitro-2-(3-phenylpropylamino)benzoic acid	OC(=O)c1cc([N+](=O)[O-])ccc1NCCCc1ccccc1	Ye, X. et al., 2014. A pharmacological network for lifespan extension in Caenorhabditis elegans. Aging cell, 13(2), pp.206–215.	NEGATIVE
AC-55649	OC(=O)c1ccc(cc1)-c1ccc(cc1)CCCCCCCC	Ye, X. et al., 2014. A pharmacological network for lifespan extension in Caenorhabditis elegans. Aging cell, 13(2), pp.206–215.	NEGATIVE
TTNPB	OC(=O)c1ccc(cc1)\C=C(/C)\c1cc2c(cc1)C(CCC2(C)C)(C)C	Ye, X. et al., 2014. A pharmacological network for lifespan extension in Caenorhabditis elegans. Aging cell, 13(2), pp.206–215.	NEGATIVE
(±)-alpha-Methyl-4-carboxyphenylglycine	OC(=O)c1ccc(cc1)C(N)(C(O)=O)C	Ye, X. et al., 2014. A pharmacological network for lifespan extension in Caenorhabditis elegans. Aging cell, 13(2), pp.206–215.	NEGATIVE
Phthalamoyl-L-glutamic acid trisodium	OC(=O)c1ccccc1C(=O)N[C@H](CCC(O)=O)C(O)=O	Ye, X. et al., 2014. A pharmacological network for lifespan extension in Caenorhabditis elegans. Aging cell, 13(2), pp.206–215.	NEGATIVE
N-Phenylanthranilic acid	OC(=O)c1ccccc1Nc1ccccc1	Ye, X. et al., 2014. A pharmacological network for lifespan extension in Caenorhabditis elegans. Aging cell, 13(2), pp.206–215.	NEGATIVE
Quinolinic acid	OC(=O)c1cccnc1C(O)=O	Ye, X. et al., 2014. A pharmacological network for lifespan extension in Caenorhabditis elegans. Aging cell, 13(2), pp.206–215.	NEGATIVE
Isonipecotic acid	OC(=O)C1CCNCC1	Ye, X. et al., 2014. A pharmacological network for lifespan extension in Caenorhabditis elegans. Aging cell, 13(2), pp.206–215.	NEGATIVE
Fusaric acid	OC(=O)c1ncc(cc1)CCCC	Ye, X. et al., 2014. A pharmacological network for lifespan extension in Caenorhabditis elegans. Aging cell, 13(2), pp.206–215.	NEGATIVE
L-Glutamic acid hydrochloride	OC(=O)CC[C@H](N)C(O)=O	Ye, X. et al., 2014. A pharmacological network for lifespan extension in Caenorhabditis elegans. Aging cell, 13(2), pp.206–215.	NEGATIVE
Alpha-Guanidinoglutaric acid	OC(=O)CC[C@@H](N=C(N)N)C(O)=O	Ye, X. et al., 2014. A pharmacological network for lifespan extension in Caenorhabditis elegans. Aging cell, 13(2), pp.206–215.	NEGATIVE
Methotrexate	OC(=O)CC[C@@H](NC(=O)c1ccc(N(Cc2nc3c(nc(nc3N)N)nc2)C)cc1)C(O)=O	Ye, X. et al., 2014. A pharmacological network for lifespan extension in Caenorhabditis elegans. Aging cell, 13(2), pp.206–215.	NEGATIVE
Aminopterin	OC(=O)CC[C@@H](NC(=O)c1ccc(NCc2nc3c(nc(nc3N)N)nc2)cc1)C(O)=O	Ye, X. et al., 2014. A pharmacological network for lifespan extension in Caenorhabditis elegans. Aging cell, 13(2), pp.206–215.	NEGATIVE
CR 2249	OC(=O)CC[C@H](N)C(=O)NC1CCC(CC1)(C)C	Ye, X. et al., 2014. A pharmacological network for lifespan extension in Caenorhabditis elegans. Aging cell, 13(2), pp.206–215.	NEGATIVE
Gamma-Acetylinic GABA	OC(=O)CC[C@H](N)C#C	Ye, X. et al., 2014. A pharmacological network for lifespan extension in Caenorhabditis elegans. Aging cell, 13(2), pp.206–215.	NEGATIVE
(±)-gamma-Vinyl GABA	OC(=O)CC[C@H](N)C=C	Ye, X. et al., 2014. A pharmacological network for lifespan extension in Caenorhabditis elegans. Aging cell, 13(2), pp.206–215.	NEGATIVE
Proglumide	OC(=O)CC[C@H](NC(=O)c1ccccc1)C(=O)N(CCC)CCC	Ye, X. et al., 2014. A pharmacological network for lifespan extension in Caenorhabditis elegans. Aging cell, 13(2), pp.206–215.	NEGATIVE
3-Nitropropionic acid	OC(=O)CC[N+](=O)[O-]	Ye, X. et al., 2014. A pharmacological network for lifespan extension in Caenorhabditis elegans. Aging cell, 13(2), pp.206–215.	NEGATIVE
Gabapentin	OC(=O)CC1(CCCCC1)CN	Ye, X. et al., 2014. A pharmacological network for lifespan extension in Caenorhabditis elegans. Aging cell, 13(2), pp.206–215.	NEGATIVE
Imidazole-4-acetic acid hydrochloride	OC(=O)Cc1[nH]cnc1	Ye, X. et al., 2014. A pharmacological network for lifespan extension in Caenorhabditis elegans. Aging cell, 13(2), pp.206–215.	NEGATIVE
L-2-aminoadipic acid	OC(=O)CCC[C@@H](N)C(O)=O	Ye, X. et al., 2014. A pharmacological network for lifespan extension in Caenorhabditis elegans. Aging cell, 13(2), pp.206–215.	NEGATIVE
5-hydroxydecanoic acid sodium	OC(=O)CCC[C@H](O)CCCCC	Ye, X. et al., 2014. A pharmacological network for lifespan extension in Caenorhabditis elegans. Aging cell, 13(2), pp.206–215.	NEGATIVE
7,7-Dimethyl-(5Z,8Z)-eicosadienoic acid	OC(=O)CCC\C=C\C(\C=C\CCCCCCCCCCC)(C)C	Ye, X. et al., 2014. A pharmacological network for lifespan extension in Caenorhabditis elegans. Aging cell, 13(2), pp.206–215.	NEGATIVE
Oleic Acid	OC(=O)CCCCCCC\C=C\CCCCCCCC	Ye, X. et al., 2014. A pharmacological network for lifespan extension in Caenorhabditis elegans. Aging cell, 13(2), pp.206–215.	NEGATIVE
Azelaic acid	OC(=O)CCCCCCCC(O)=O	Ye, X. et al., 2014. A pharmacological network for lifespan extension in Caenorhabditis elegans. Aging cell, 13(2), pp.206–215.	NEGATIVE
6-Aminohexanoic acid	OC(=O)CCCCCN	Ye, X. et al., 2014. A pharmacological network for lifespan extension in Caenorhabditis elegans. Aging cell, 13(2), pp.206–215.	NEGATIVE
5-Aminovaleric acid hydrochloride	OC(=O)CCCCN	Ye, X. et al., 2014. A pharmacological network for lifespan extension in Caenorhabditis elegans. Aging cell, 13(2), pp.206–215.	NEGATIVE
GABA	OC(=O)CCCN	Ye, X. et al., 2014. A pharmacological network for lifespan extension in Caenorhabditis elegans. Aging cell, 13(2), pp.206–215.	NEGATIVE
Diethylenetriaminepentaacetic acid	OC(=O)CN(CCN(CC(O)=O)CC(O)=O)CCN(CC(O)=O)CC(O)=O	Ye, X. et al., 2014. A pharmacological network for lifespan extension in Caenorhabditis elegans. Aging cell, 13(2), pp.206–215.	NEGATIVE
N-arachidonylglycine	OC(=O)CNC(=O)CCC\C=C\C\C=C\C\C=C\C\C=C\CCCCC	Ye, X. et al., 2014. A pharmacological network for lifespan extension in Caenorhabditis elegans. Aging cell, 13(2), pp.206–215.	NEGATIVE
Fexofenadine hydrochloride	OC(C1CCN(CC1)CCC[C@H](O)c1ccc(cc1)C(C(O)=O)(C)C)(c1ccccc1)c1ccccc1	Ye, X. et al., 2014. A pharmacological network for lifespan extension in Caenorhabditis elegans. Aging cell, 13(2), pp.206–215.	NEGATIVE
Terfenadine	OC(C1CCN(CC1)CCC[C@H](O)c1ccc(cc1)C(C)(C)C)(c1ccccc1)c1ccccc1	Ye, X. et al., 2014. A pharmacological network for lifespan extension in Caenorhabditis elegans. Aging cell, 13(2), pp.206–215.	NEGATIVE
Trihexyphenidyl hydrochloride	OC(CCN1CCCCC1)(C1CCCCC1)c1ccccc1	Ye, X. et al., 2014. A pharmacological network for lifespan extension in Caenorhabditis elegans. Aging cell, 13(2), pp.206–215.	NEGATIVE
Tropicamide	OC[C@@H](C(=O)N(Cc1ccncc1)CC)c1ccccc1	Ye, X. et al., 2014. A pharmacological network for lifespan extension in Caenorhabditis elegans. Aging cell, 13(2), pp.206–215.	NEGATIVE
Actinonin	OC[C@@H]1N(CCC1)C(=O)[C@H](NC(=O)[C@H](CCCCC)CC(=O)NO)C(C)C	Ye, X. et al., 2014. A pharmacological network for lifespan extension in Caenorhabditis elegans. Aging cell, 13(2), pp.206–215.	NEGATIVE
Sphingosine	OC[C@H](N)[C@H](O)\C=C\CCCCCCCCCCCCC	Ye, X. et al., 2014. A pharmacological network for lifespan extension in Caenorhabditis elegans. Aging cell, 13(2), pp.206–215.	NEGATIVE
DL-erythro-Dihydrosphingosine	OC[C@H](N)[C@H](O)CCCCCCCCCCCCCCC	Ye, X. et al., 2014. A pharmacological network for lifespan extension in Caenorhabditis elegans. Aging cell, 13(2), pp.206–215.	NEGATIVE
Methysergide maleate	OC[C@H](NC(=O)[C@H]1C=C2[C@H](N(C1)C)Cc1c3c2cccc3n(c1)C)CC	Ye, X. et al., 2014. A pharmacological network for lifespan extension in Caenorhabditis elegans. Aging cell, 13(2), pp.206–215.	NEGATIVE
Roscovitine	OC[C@H](Nc1nc(NCc2ccccc2)c2ncn(c2n1)C(C)C)CC	Ye, X. et al., 2014. A pharmacological network for lifespan extension in Caenorhabditis elegans. Aging cell, 13(2), pp.206–215.	NEGATIVE
Cortisone	OC1(CC[C@@H]2[C@H]3[C@@H](C4(C(=CC(=O)CC4)CC3)C)C(=O)CC12C)C(=O)CO	Ye, X. et al., 2014. A pharmacological network for lifespan extension in Caenorhabditis elegans. Aging cell, 13(2), pp.206–215.	NEGATIVE
Hydrocortisone	OC1(CC[C@@H]2[C@H]3[C@H]([C@@H](O)CC12C)C1(C(=CC(=O)CC1)CC3)C)C(=O)CO	Ye, X. et al., 2014. A pharmacological network for lifespan extension in Caenorhabditis elegans. Aging cell, 13(2), pp.206–215.	NEGATIVE
Hydrocortisone 21-hemisuccinate sodium	OC1(CC[C@@H]2[C@H]3[C@H]([C@@H](O)CC12C)C1(C(=CC(=O)CC1)CC3)C)C(=O)COC(=O)CCC(O)=O	Ye, X. et al., 2014. A pharmacological network for lifespan extension in Caenorhabditis elegans. Aging cell, 13(2), pp.206–215.	NEGATIVE
17alpha-hydroxyprogesterone	OC1(CC[C@H]2[C@@H]3[C@@H](CCC12C)C1(C(=CC(=O)CC1)CC3)C)C(=O)C	Ye, X. et al., 2014. A pharmacological network for lifespan extension in Caenorhabditis elegans. Aging cell, 13(2), pp.206–215.	NEGATIVE
Cortisone 21-acetate	OC1(CC[C@H]2[C@@H]3[C@H](C4(C(=CC(=O)CC4)CC3)C)C(=O)CC12C)C(=O)COC(=O)C	Ye, X. et al., 2014. A pharmacological network for lifespan extension in Caenorhabditis elegans. Aging cell, 13(2), pp.206–215.	NEGATIVE
Mifepristone	OC1(CC[C@H]2[C@@H]3C(=C4C(=CC(=O)CC4)CC3)[C@@H](CC12C)c1ccc(N(C)C)cc1)C#CC	Ye, X. et al., 2014. A pharmacological network for lifespan extension in Caenorhabditis elegans. Aging cell, 13(2), pp.206–215.	NEGATIVE
WIN 62,577	OC1(CC[C@H]2[C@H]3[C@@H](CCC12C)C1(C(CC3)=CC2=Nc3n(C=C2C1)c1c(n3)cccc1)C)C#C	Ye, X. et al., 2014. A pharmacological network for lifespan extension in Caenorhabditis elegans. Aging cell, 13(2), pp.206–215.	NEGATIVE
(±)-Butaclamol hydrochloride	OC1(CCN2[C@@H](C1)c1c3[C@@H](c4c(CCc3ccc1)cccc4)C2)C(C)(C)C	Ye, X. et al., 2014. A pharmacological network for lifespan extension in Caenorhabditis elegans. Aging cell, 13(2), pp.206–215.	NEGATIVE
4-Androsten-4-ol-3,17-dione	OC1=C2CC[C@H]3[C@H]4CCC(=O)C4(CC[C@@H]3C2(CCC1=O)C)C	Ye, X. et al., 2014. A pharmacological network for lifespan extension in Caenorhabditis elegans. Aging cell, 13(2), pp.206–215.	NEGATIVE
Karakoline	OC12[C@@H]3[C@H](C45[C@@H]6C[C@@H]1[C@@H]4N(CC6(CC[C@H]5O)C)CC)C[C@@H]([C@H](OC)C2)[C@H]3O	Ye, X. et al., 2014. A pharmacological network for lifespan extension in Caenorhabditis elegans. Aging cell, 13(2), pp.206–215.	NEGATIVE
Apomorphine hydrochloride hemihydrate	Oc1c-2c(C[C@@H]3N(CCc4c3c-2ccc4)C)ccc1O	Ye, X. et al., 2014. A pharmacological network for lifespan extension in Caenorhabditis elegans. Aging cell, 13(2), pp.206–215.	NEGATIVE
R(-)-N-Allylnorapomorphine hydrobromide	Oc1c-2c(C[C@@H]3N(CCc4c3c-2ccc4)CC=C)ccc1O	Ye, X. et al., 2014. A pharmacological network for lifespan extension in Caenorhabditis elegans. Aging cell, 13(2), pp.206–215.	NEGATIVE
R(-)-Propylnorapomorphine hydrochloride	Oc1c-2c(C[C@@H]3N(CCc4c3c-2ccc4)CCC)ccc1O	Ye, X. et al., 2014. A pharmacological network for lifespan extension in Caenorhabditis elegans. Aging cell, 13(2), pp.206–215.	NEGATIVE
3,5-Dinitrocatechol	Oc1c([N+](=O)[O-])cc([N+](=O)[O-])cc1O	Ye, X. et al., 2014. A pharmacological network for lifespan extension in Caenorhabditis elegans. Aging cell, 13(2), pp.206–215.	NEGATIVE
Oxymetazoline hydrochloride	Oc1c(C)c(CC=2NCCN=2)c(cc1C(C)(C)C)C	Ye, X. et al., 2014. A pharmacological network for lifespan extension in Caenorhabditis elegans. Aging cell, 13(2), pp.206–215.	NEGATIVE
Tyrphostin A9	Oc1c(cc(cc1C(C)(C)C)C=C(C#N)C#N)C(C)(C)C	Ye, X. et al., 2014. A pharmacological network for lifespan extension in Caenorhabditis elegans. Aging cell, 13(2), pp.206–215.	NEGATIVE
CGP-13501	Oc1c(cc(cc1C(C)(C)C)CC(C=O)(C)C)C(C)(C)C	Ye, X. et al., 2014. A pharmacological network for lifespan extension in Caenorhabditis elegans. Aging cell, 13(2), pp.206–215.	NEGATIVE
CGP-7930	Oc1c(cc(cc1C(C)(C)C)CC(CO)(C)C)C(C)(C)C	Ye, X. et al., 2014. A pharmacological network for lifespan extension in Caenorhabditis elegans. Aging cell, 13(2), pp.206–215.	NEGATIVE
Propofol	Oc1c(cccc1C(C)C)C(C)C	Ye, X. et al., 2014. A pharmacological network for lifespan extension in Caenorhabditis elegans. Aging cell, 13(2), pp.206–215.	NEGATIVE
Benserazide hydrochloride	Oc1c(O)c(O)ccc1CNNC(=O)[C@@H](N)CO	Ye, X. et al., 2014. A pharmacological network for lifespan extension in Caenorhabditis elegans. Aging cell, 13(2), pp.206–215.	NEGATIVE
Tyrphostin 51	Oc1c(O)cc(cc1O)\C=C(\C(N)=C(C#N)C#N)/C#N	Ye, X. et al., 2014. A pharmacological network for lifespan extension in Caenorhabditis elegans. Aging cell, 13(2), pp.206–215.	NEGATIVE
Tyrphostin 25	Oc1c(O)cc(cc1O)C=C(C#N)C#N	Ye, X. et al., 2014. A pharmacological network for lifespan extension in Caenorhabditis elegans. Aging cell, 13(2), pp.206–215.	NEGATIVE
R(-)-2,10,11-Trihydroxyaporphine hybrobromide	Oc1c2-c3cc(O)cc4CCN([C@@H](Cc2ccc1O)c34)C	Ye, X. et al., 2014. A pharmacological network for lifespan extension in Caenorhabditis elegans. Aging cell, 13(2), pp.206–215.	NEGATIVE
R(-)-2,10,11-Trihydroxy-N-propylnoraporphine hydrobromide	Oc1c2-c3cc(O)cc4CCN([C@@H](Cc2ccc1O)c34)CCC	Ye, X. et al., 2014. A pharmacological network for lifespan extension in Caenorhabditis elegans. Aging cell, 13(2), pp.206–215.	NEGATIVE
Mitoxantrone	Oc1c2c(C(=O)c3c(C2=O)c(NCCNCCO)ccc3NCCNCCO)c(O)cc1	Ye, X. et al., 2014. A pharmacological network for lifespan extension in Caenorhabditis elegans. Aging cell, 13(2), pp.206–215.	NEGATIVE
Emodin	Oc1c2c(cc(c1)C)C(=O)c1c(C2=O)c(O)cc(O)c1	Ye, X. et al., 2014. A pharmacological network for lifespan extension in Caenorhabditis elegans. Aging cell, 13(2), pp.206–215.	NEGATIVE
1,5-Isoquinolinediol	Oc1c2c(ccc1)C(=O)NC=C2	Ye, X. et al., 2014. A pharmacological network for lifespan extension in Caenorhabditis elegans. Aging cell, 13(2), pp.206–215.	NEGATIVE
(±)-8-Hydroxy-DPAT hydrobromide	Oc1c2C[C@H](N(CCC)CCC)CCc2ccc1	Ye, X. et al., 2014. A pharmacological network for lifespan extension in Caenorhabditis elegans. Aging cell, 13(2), pp.206–215.	NEGATIVE
(±)-PPHT hydrochloride	Oc1c2CC[C@@H](N(CCc3ccccc3)CCC)Cc2ccc1	Ye, X. et al., 2014. A pharmacological network for lifespan extension in Caenorhabditis elegans. Aging cell, 13(2), pp.206–215.	NEGATIVE
Edrophonium chloride	Oc1cc([N+](CC)(C)C)ccc1	Ye, X. et al., 2014. A pharmacological network for lifespan extension in Caenorhabditis elegans. Aging cell, 13(2), pp.206–215.	NEGATIVE
(S)-3,5-Dihydroxyphenylglycine	Oc1cc(cc(O)c1)[C@@H](N)C(O)=O	Ye, X. et al., 2014. A pharmacological network for lifespan extension in Caenorhabditis elegans. Aging cell, 13(2), pp.206–215.	NEGATIVE
Fenoterol hydrobromide	Oc1cc(cc(O)c1)[C@H](O)CN[C@@H](Cc1ccc(O)cc1)C	Ye, X. et al., 2014. A pharmacological network for lifespan extension in Caenorhabditis elegans. Aging cell, 13(2), pp.206–215.	NEGATIVE
Terbutaline hemisulfate	Oc1cc(cc(O)c1)[C@H](O)CNC(C)(C)C	Ye, X. et al., 2014. A pharmacological network for lifespan extension in Caenorhabditis elegans. Aging cell, 13(2), pp.206–215.	NEGATIVE
Metaproterenol hemisulfate	Oc1cc(cc(O)c1)[C@H](O)CNC(C)C	Ye, X. et al., 2014. A pharmacological network for lifespan extension in Caenorhabditis elegans. Aging cell, 13(2), pp.206–215.	NEGATIVE
S(-)-3PPP hydrochloride	Oc1cc(ccc1)[C@@H]1CCCN(C1)CCC	Ye, X. et al., 2014. A pharmacological network for lifespan extension in Caenorhabditis elegans. Aging cell, 13(2), pp.206–215.	NEGATIVE
Phenylephrine hydrochloride	Oc1cc(ccc1)[C@H](O)CNC	Ye, X. et al., 2014. A pharmacological network for lifespan extension in Caenorhabditis elegans. Aging cell, 13(2), pp.206–215.	NEGATIVE
3-Hydroxybenzylhydrazine dihydrochloride	Oc1cc(ccc1)CNN	Ye, X. et al., 2014. A pharmacological network for lifespan extension in Caenorhabditis elegans. Aging cell, 13(2), pp.206–215.	NEGATIVE
CP55940	Oc1cc(ccc1[C@@H]1C[C@@H](O)CC[C@@H]1CCCO)C(CCCCCC)(C)C	Ye, X. et al., 2014. A pharmacological network for lifespan extension in Caenorhabditis elegans. Aging cell, 13(2), pp.206–215.	NEGATIVE
Tyrphostin AG 126	Oc1cc(ccc1[N+](=O)[O-])C=C(C#N)C#N	Ye, X. et al., 2014. A pharmacological network for lifespan extension in Caenorhabditis elegans. Aging cell, 13(2), pp.206–215.	NEGATIVE
(±)-Norepinephrine (+)bitartrate	Oc1cc(ccc1O)[C@@H](O)CN	Ye, X. et al., 2014. A pharmacological network for lifespan extension in Caenorhabditis elegans. Aging cell, 13(2), pp.206–215.	NEGATIVE
(-)-alpha-Methylnorepinephrine	Oc1cc(ccc1O)[C@H](O)[C@H](N)C	Ye, X. et al., 2014. A pharmacological network for lifespan extension in Caenorhabditis elegans. Aging cell, 13(2), pp.206–215.	NEGATIVE
Isotharine mesylate	Oc1cc(ccc1O)[C@H](O)[C@H](NC(C)C)CC	Ye, X. et al., 2014. A pharmacological network for lifespan extension in Caenorhabditis elegans. Aging cell, 13(2), pp.206–215.	NEGATIVE
Tyrphostin AG 835	Oc1cc(ccc1O)\C=C(\C(=O)N[C@@H](C)c1ccccc1)/C#N	Ye, X. et al., 2014. A pharmacological network for lifespan extension in Caenorhabditis elegans. Aging cell, 13(2), pp.206–215.	NEGATIVE
Tyrphostin AG 528	Oc1cc(ccc1O)\C=C(\C(=O)N1CCc2c1cccc2)/C#N	Ye, X. et al., 2014. A pharmacological network for lifespan extension in Caenorhabditis elegans. Aging cell, 13(2), pp.206–215.	NEGATIVE
Tyrphostin AG 494	Oc1cc(ccc1O)\C=C(\C(=O)Nc1ccccc1)/C#N	Ye, X. et al., 2014. A pharmacological network for lifespan extension in Caenorhabditis elegans. Aging cell, 13(2), pp.206–215.	NEGATIVE
Tyrphostin AG 490	Oc1cc(ccc1O)\C=C(\C(=O)NCc1ccccc1)/C#N	Ye, X. et al., 2014. A pharmacological network for lifespan extension in Caenorhabditis elegans. Aging cell, 13(2), pp.206–215.	NEGATIVE
Tyrphostin AG 698	Oc1cc(ccc1O)\C=C(\C(=O)NCCc1ccccc1)/C#N	Ye, X. et al., 2014. A pharmacological network for lifespan extension in Caenorhabditis elegans. Aging cell, 13(2), pp.206–215.	NEGATIVE
Tyrphostin AG 555	Oc1cc(ccc1O)\C=C(\C(=O)NCCCc1ccccc1)/C#N	Ye, X. et al., 2014. A pharmacological network for lifespan extension in Caenorhabditis elegans. Aging cell, 13(2), pp.206–215.	NEGATIVE
Tyrphostin AG 537	Oc1cc(ccc1O)\C=C(\C(=O)NCCCNC(=O)\C(=C\c1cc(O)c(O)cc1)\C#N)/C#N	Ye, X. et al., 2014. A pharmacological network for lifespan extension in Caenorhabditis elegans. Aging cell, 13(2), pp.206–215.	NEGATIVE
Piceatannol	Oc1cc(ccc1O)\C=C\c1cc(O)cc(O)c1	Ye, X. et al., 2014. A pharmacological network for lifespan extension in Caenorhabditis elegans. Aging cell, 13(2), pp.206–215.	NEGATIVE
Tyrphostin AG 808	Oc1cc(ccc1O)C(=O)\C(=C\c1c2c([nH]c1)cccc2)\C#N	Ye, X. et al., 2014. A pharmacological network for lifespan extension in Caenorhabditis elegans. Aging cell, 13(2), pp.206–215.	NEGATIVE
Tyrphostin AG 538	Oc1cc(ccc1O)C(=O)\C(=C\c1cc(O)c(O)cc1)\C#N	Ye, X. et al., 2014. A pharmacological network for lifespan extension in Caenorhabditis elegans. Aging cell, 13(2), pp.206–215.	NEGATIVE
L-alpha-Methyl DOPA	Oc1cc(ccc1O)C[C@](N)(C(O)=O)C	Ye, X. et al., 2014. A pharmacological network for lifespan extension in Caenorhabditis elegans. Aging cell, 13(2), pp.206–215.	NEGATIVE
L-3,4-Dihydroxyphenylalanine	Oc1cc(ccc1O)C[C@@H](N)C(O)=O	Ye, X. et al., 2014. A pharmacological network for lifespan extension in Caenorhabditis elegans. Aging cell, 13(2), pp.206–215.	NEGATIVE
L-3,4-Dihydroxyphenylalanine methyl ester	Oc1cc(ccc1O)C[C@H](N)C(OC)=O	Ye, X. et al., 2014. A pharmacological network for lifespan extension in Caenorhabditis elegans. Aging cell, 13(2), pp.206–215.	NEGATIVE
Tyrphostin 23	Oc1cc(ccc1O)C=C(C#N)C#N	Ye, X. et al., 2014. A pharmacological network for lifespan extension in Caenorhabditis elegans. Aging cell, 13(2), pp.206–215.	NEGATIVE
S-(-)-Carbidopa	Oc1cc(ccc1O)CC(NN)(C(O)=O)C	Ye, X. et al., 2014. A pharmacological network for lifespan extension in Caenorhabditis elegans. Aging cell, 13(2), pp.206–215.	NEGATIVE
3,4-Dihydroxyphenylacetic acid	Oc1cc(ccc1O)CC(O)=O	Ye, X. et al., 2014. A pharmacological network for lifespan extension in Caenorhabditis elegans. Aging cell, 13(2), pp.206–215.	NEGATIVE
Dopamine hydrochloride	Oc1cc(ccc1O)CCN	Ye, X. et al., 2014. A pharmacological network for lifespan extension in Caenorhabditis elegans. Aging cell, 13(2), pp.206–215.	NEGATIVE
Dipropyldopamine hydrobromide	Oc1cc(ccc1O)CCN(CCC)CCC	Ye, X. et al., 2014. A pharmacological network for lifespan extension in Caenorhabditis elegans. Aging cell, 13(2), pp.206–215.	NEGATIVE
Dobutamine hydrochloride	Oc1cc(ccc1O)CCN[C@@H](CCc1ccc(O)cc1)C	Ye, X. et al., 2014. A pharmacological network for lifespan extension in Caenorhabditis elegans. Aging cell, 13(2), pp.206–215.	NEGATIVE
N-Methyldopamine hydrochloride	Oc1cc(ccc1O)CCNC	Ye, X. et al., 2014. A pharmacological network for lifespan extension in Caenorhabditis elegans. Aging cell, 13(2), pp.206–215.	NEGATIVE
N-Acetyldopamine monohydrate	Oc1cc(ccc1O)CCNC(=O)C	Ye, X. et al., 2014. A pharmacological network for lifespan extension in Caenorhabditis elegans. Aging cell, 13(2), pp.206–215.	NEGATIVE
N-Oleoyldopamine	Oc1cc(ccc1O)CCNC(=O)CCCCCCC\C=C\CCCCCCCC	Ye, X. et al., 2014. A pharmacological network for lifespan extension in Caenorhabditis elegans. Aging cell, 13(2), pp.206–215.	NEGATIVE
Phentolamine mesylate	Oc1cc(N(CC=2NCCN=2)c2ccc(cc2)C)ccc1	Ye, X. et al., 2014. A pharmacological network for lifespan extension in Caenorhabditis elegans. Aging cell, 13(2), pp.206–215.	NEGATIVE
6-Hydroxy-DL-DOPA	Oc1cc(O)c(O)cc1C[C@@H](N)C(O)=O	Ye, X. et al., 2014. A pharmacological network for lifespan extension in Caenorhabditis elegans. Aging cell, 13(2), pp.206–215.	NEGATIVE
Phloretin	Oc1cc(O)cc(O)c1C(=O)CCc1ccc(O)cc1	Ye, X. et al., 2014. A pharmacological network for lifespan extension in Caenorhabditis elegans. Aging cell, 13(2), pp.206–215.	NEGATIVE
Isoliquiritigenin	Oc1cc(O)ccc1C(=O)\C=C\c1ccc(O)cc1	Ye, X. et al., 2014. A pharmacological network for lifespan extension in Caenorhabditis elegans. Aging cell, 13(2), pp.206–215.	NEGATIVE
Cis(+/-)-8-OH-PBZI hydrobromide	Oc1cc2[C@H]3[C@@H](N(CC3)CCC)CCc2cc1	Ye, X. et al., 2014. A pharmacological network for lifespan extension in Caenorhabditis elegans. Aging cell, 13(2), pp.206–215.	NEGATIVE
2-Methyl-5-hydroxytryptamine maleate	Oc1cc2c([nH]c(C)c2CCN)cc1	Ye, X. et al., 2014. A pharmacological network for lifespan extension in Caenorhabditis elegans. Aging cell, 13(2), pp.206–215.	NEGATIVE
5-Hydroxy-L-tryptophan	Oc1cc2c([nH]cc2C[C@@H](N)C(O)=O)cc1	Ye, X. et al., 2014. A pharmacological network for lifespan extension in Caenorhabditis elegans. Aging cell, 13(2), pp.206–215.	NEGATIVE
alpha-Methyl-5-hydroxytryptamine maleate	Oc1cc2c([nH]cc2C[C@H](N)C)cc1	Ye, X. et al., 2014. A pharmacological network for lifespan extension in Caenorhabditis elegans. Aging cell, 13(2), pp.206–215.	NEGATIVE
BRL 54443 maleate	Oc1cc2c([nH]cc2C2CCN(CC2)C)cc1	Ye, X. et al., 2014. A pharmacological network for lifespan extension in Caenorhabditis elegans. Aging cell, 13(2), pp.206–215.	NEGATIVE
5-Hydroxyindolacetic acid	Oc1cc2c([nH]cc2CC(O)=O)cc1	Ye, X. et al., 2014. A pharmacological network for lifespan extension in Caenorhabditis elegans. Aging cell, 13(2), pp.206–215.	NEGATIVE
Serotonin hydrochloride	Oc1cc2c([nH]cc2CCN)cc1	Ye, X. et al., 2014. A pharmacological network for lifespan extension in Caenorhabditis elegans. Aging cell, 13(2), pp.206–215.	NEGATIVE
N-Acetyl-5-hydroxytryptamine	Oc1cc2c([nH]cc2CCNC(=O)C)cc1	Ye, X. et al., 2014. A pharmacological network for lifespan extension in Caenorhabditis elegans. Aging cell, 13(2), pp.206–215.	NEGATIVE
N-omega-Methyl-5-hydroxytryptamine oxalate salt	Oc1cc2c([nH]cc2CCNC)cc1	Ye, X. et al., 2014. A pharmacological network for lifespan extension in Caenorhabditis elegans. Aging cell, 13(2), pp.206–215.	NEGATIVE
(±)-N-Allylnormetazocine hydrochloride	Oc1cc2c(C[C@@H]3N(CCC2(C)[C@@H]3C)CC=C)cc1	Ye, X. et al., 2014. A pharmacological network for lifespan extension in Caenorhabditis elegans. Aging cell, 13(2), pp.206–215.	NEGATIVE
(+)-Cyclazocine	Oc1cc2c(C[C@@H]3N(CCC2(C)[C@@H]3C)CC2CC2)cc1	Ye, X. et al., 2014. A pharmacological network for lifespan extension in Caenorhabditis elegans. Aging cell, 13(2), pp.206–215.	NEGATIVE
SKF 75670 hydrobromide	Oc1cc2c(cc1O)CCN(C[C@@H]2c1ccccc1)C	Ye, X. et al., 2014. A pharmacological network for lifespan extension in Caenorhabditis elegans. Aging cell, 13(2), pp.206–215.	NEGATIVE
(±)-SKF 38393, N-allyl-, hydrobromide	Oc1cc2c(cc1O)CCN(C[C@@H]2c1ccccc1)CC=C	Ye, X. et al., 2014. A pharmacological network for lifespan extension in Caenorhabditis elegans. Aging cell, 13(2), pp.206–215.	NEGATIVE
(±)-SKF-38393 hydrochloride	Oc1cc2c(cc1O)CCNC[C@H]2c1ccccc1	Ye, X. et al., 2014. A pharmacological network for lifespan extension in Caenorhabditis elegans. Aging cell, 13(2), pp.206–215.	NEGATIVE
(-)-Eseroline fumarate	Oc1cc2c(N([C@H]3N(CCC23C)C)C)cc1	Ye, X. et al., 2014. A pharmacological network for lifespan extension in Caenorhabditis elegans. Aging cell, 13(2), pp.206–215.	NEGATIVE
(±)-7-Hydroxy-DPAT hydrobromide	Oc1cc2C[C@H](N(CCC)CCC)CCc2cc1	Ye, X. et al., 2014. A pharmacological network for lifespan extension in Caenorhabditis elegans. Aging cell, 13(2), pp.206–215.	NEGATIVE
6,7-ADTN hydrobromide	Oc1cc2C[C@H](N)CCc2cc1O	Ye, X. et al., 2014. A pharmacological network for lifespan extension in Caenorhabditis elegans. Aging cell, 13(2), pp.206–215.	NEGATIVE
Dextrorphan D-tartrate	Oc1cc2C34[C@@H]([C@@H](N(CC3)C)Cc2cc1)CCCC4	Ye, X. et al., 2014. A pharmacological network for lifespan extension in Caenorhabditis elegans. Aging cell, 13(2), pp.206–215.	NEGATIVE
Levallorphan tartrate	Oc1cc2C34[C@@H]([C@@H](N(CC3)CC=C)Cc2cc1)CCCC4	Ye, X. et al., 2014. A pharmacological network for lifespan extension in Caenorhabditis elegans. Aging cell, 13(2), pp.206–215.	NEGATIVE
Estrone	Oc1cc2CC[C@H]3[C@@H]4CCC(=O)C4(CC[C@H]3c2cc1)C	Ye, X. et al., 2014. A pharmacological network for lifespan extension in Caenorhabditis elegans. Aging cell, 13(2), pp.206–215.	NEGATIVE
Dihydrexidine hydrochloride	Oc1cc2CC[C@H]3NCc4c([C@@H]3c2cc1O)cccc4	Ye, X. et al., 2014. A pharmacological network for lifespan extension in Caenorhabditis elegans. Aging cell, 13(2), pp.206–215.	NEGATIVE
(±)-Octopamine hydrochloride	Oc1ccc(cc1)[C@@H](O)CN	Ye, X. et al., 2014. A pharmacological network for lifespan extension in Caenorhabditis elegans. Aging cell, 13(2), pp.206–215.	NEGATIVE
Ro 25-6981 hydrochloride	Oc1ccc(cc1)[C@H](O)[C@@H](CN1CCC(CC1)Cc1ccccc1)C	Ye, X. et al., 2014. A pharmacological network for lifespan extension in Caenorhabditis elegans. Aging cell, 13(2), pp.206–215.	NEGATIVE
Nylidrin hydrochloride	Oc1ccc(cc1)[C@H](O)[C@H](N[C@@H](CCc1ccccc1)C)C	Ye, X. et al., 2014. A pharmacological network for lifespan extension in Caenorhabditis elegans. Aging cell, 13(2), pp.206–215.	NEGATIVE
Ifenprodil tartrate	Oc1ccc(cc1)[C@H](O)[C@H](N1CCC(CC1)Cc1ccccc1)C	Ye, X. et al., 2014. A pharmacological network for lifespan extension in Caenorhabditis elegans. Aging cell, 13(2), pp.206–215.	NEGATIVE
(±)-Synephrine	Oc1ccc(cc1)[C@H](O)CNC	Ye, X. et al., 2014. A pharmacological network for lifespan extension in Caenorhabditis elegans. Aging cell, 13(2), pp.206–215.	NEGATIVE
Tyrphostin AG 112	Oc1ccc(cc1)\C=C(\C(N)=C(C#N)C#N)/C#N	Ye, X. et al., 2014. A pharmacological network for lifespan extension in Caenorhabditis elegans. Aging cell, 13(2), pp.206–215.	NEGATIVE
4-Hydroxybenzhydrazide	Oc1ccc(cc1)C(=O)NN	Ye, X. et al., 2014. A pharmacological network for lifespan extension in Caenorhabditis elegans. Aging cell, 13(2), pp.206–215.	NEGATIVE
1,3,5-tris(4-hydroxyphenyl)-4-propyl-1H-pyrazole	Oc1ccc(cc1)C=1N(NC(C=1CCC)=C1C=CC(=O)C=C1)c1ccc(O)cc1	Ye, X. et al., 2014. A pharmacological network for lifespan extension in Caenorhabditis elegans. Aging cell, 13(2), pp.206–215.	NEGATIVE
DL-alpha-Methyl-p-tyrosine	Oc1ccc(cc1)CC(N)(C(O)=O)C	Ye, X. et al., 2014. A pharmacological network for lifespan extension in Caenorhabditis elegans. Aging cell, 13(2), pp.206–215.	NEGATIVE
Alpha-Methyl-DL-tyrosine methyl ester hydrochloride	Oc1ccc(cc1)CC(N)(C(OC)=O)C	Ye, X. et al., 2014. A pharmacological network for lifespan extension in Caenorhabditis elegans. Aging cell, 13(2), pp.206–215.	NEGATIVE
4-Hydroxyphenethylamine hydrochloride	Oc1ccc(cc1)CCN	Ye, X. et al., 2014. A pharmacological network for lifespan extension in Caenorhabditis elegans. Aging cell, 13(2), pp.206–215.	NEGATIVE
Ritodrine hydrochloride	Oc1ccc(cc1)CCN[C@@H]([C@@H](O)c1ccc(O)cc1)C	Ye, X. et al., 2014. A pharmacological network for lifespan extension in Caenorhabditis elegans. Aging cell, 13(2), pp.206–215.	NEGATIVE
Labetalol hydrochloride	Oc1ccc(cc1C(=O)N)[C@H](O)CN[C@@H](CCc1ccccc1)C	Ye, X. et al., 2014. A pharmacological network for lifespan extension in Caenorhabditis elegans. Aging cell, 13(2), pp.206–215.	NEGATIVE
Aurintricarboxylic acid	Oc1ccc(cc1C(O)=O)C(c1cc(C(O)=O)c(O)cc1)=C1C=C(C(O)=O)C(=O)C=C1	Ye, X. et al., 2014. A pharmacological network for lifespan extension in Caenorhabditis elegans. Aging cell, 13(2), pp.206–215.	NEGATIVE
Salbutamol	Oc1ccc(cc1CO)[C@H](O)CNC(C)(C)C	Ye, X. et al., 2014. A pharmacological network for lifespan extension in Caenorhabditis elegans. Aging cell, 13(2), pp.206–215.	NEGATIVE
Salmeterol xinafoate	Oc1ccc(cc1CO)[C@H](O)CNCCCCCCOCCCCc1ccccc1	Ye, X. et al., 2014. A pharmacological network for lifespan extension in Caenorhabditis elegans. Aging cell, 13(2), pp.206–215.	NEGATIVE
Retinoic acid p-hydroxyanilide	Oc1ccc(NC(=O)\C=C(\C=C\C=C(\C=C\C=2C(CCCC=2C)(C)C)/C)/C)cc1	Ye, X. et al., 2014. A pharmacological network for lifespan extension in Caenorhabditis elegans. Aging cell, 13(2), pp.206–215.	NEGATIVE
Hydroquinone	Oc1ccc(O)cc1	Ye, X. et al., 2014. A pharmacological network for lifespan extension in Caenorhabditis elegans. Aging cell, 13(2), pp.206–215.	NEGATIVE
Icilin	Oc1ccccc1N1CC=C(NC1=O)c1cc([N+](=O)[O-])ccc1	Ye, X. et al., 2014. A pharmacological network for lifespan extension in Caenorhabditis elegans. Aging cell, 13(2), pp.206–215.	NEGATIVE
Pyrocatechol	Oc1ccccc1O	Ye, X. et al., 2014. A pharmacological network for lifespan extension in Caenorhabditis elegans. Aging cell, 13(2), pp.206–215.	NEGATIVE
Choline bromide	OCC[N+](C)(C)C	Ye, X. et al., 2014. A pharmacological network for lifespan extension in Caenorhabditis elegans. Aging cell, 13(2), pp.206–215.	NEGATIVE
4-Imidazolemethanol hydrochloride	OCc1[nH]cnc1	Ye, X. et al., 2014. A pharmacological network for lifespan extension in Caenorhabditis elegans. Aging cell, 13(2), pp.206–215.	NEGATIVE
U-75302	OCCCC[C@H](O)Cc1nc(ccc1)\C=C\[C@H](O)C\C=C\CCCCC	Ye, X. et al., 2014. A pharmacological network for lifespan extension in Caenorhabditis elegans. Aging cell, 13(2), pp.206–215.	NEGATIVE
Dipyridamole	OCCN(CCO)c1nc(N2CCCCC2)c2nc(nc(N3CCCCC3)c2n1)N(CCO)CCO	Ye, X. et al., 2014. A pharmacological network for lifespan extension in Caenorhabditis elegans. Aging cell, 13(2), pp.206–215.	NEGATIVE
Opipramol dihydrochloride	OCCN1CCN(CC1)CCCN1c2c(C=Cc3c1cccc3)cccc2	Ye, X. et al., 2014. A pharmacological network for lifespan extension in Caenorhabditis elegans. Aging cell, 13(2), pp.206–215.	NEGATIVE
N-Oleoylethanolamine	OCCNC(=O)CCCCCCC\C=C\CCCCCCCC	Ye, X. et al., 2014. A pharmacological network for lifespan extension in Caenorhabditis elegans. Aging cell, 13(2), pp.206–215.	NEGATIVE
Palmitoylethanolamide	OCCNC(=O)CCCCCCCCCCCCCCC	Ye, X. et al., 2014. A pharmacological network for lifespan extension in Caenorhabditis elegans. Aging cell, 13(2), pp.206–215.	NEGATIVE
Olomoucine	OCCNc1nc(NCc2ccccc2)c2ncn(c2n1)C	Ye, X. et al., 2014. A pharmacological network for lifespan extension in Caenorhabditis elegans. Aging cell, 13(2), pp.206–215.	NEGATIVE
Hydroxylamine hydrochloride	ON	Ye, X. et al., 2014. A pharmacological network for lifespan extension in Caenorhabditis elegans. Aging cell, 13(2), pp.206–215.	NEGATIVE
Minoxidil	ON1C(N)=CC(=NC1=N)N1CCCCC1	Ye, X. et al., 2014. A pharmacological network for lifespan extension in Caenorhabditis elegans. Aging cell, 13(2), pp.206–215.	NEGATIVE
TPMPA	P(O)(=O)(C)C=1CCNCC=1	Ye, X. et al., 2014. A pharmacological network for lifespan extension in Caenorhabditis elegans. Aging cell, 13(2), pp.206–215.	NEGATIVE
SKF 97541 hydrochloride	P(O)(=O)(CCCN)C	Ye, X. et al., 2014. A pharmacological network for lifespan extension in Caenorhabditis elegans. Aging cell, 13(2), pp.206–215.	NEGATIVE
Phosphomycin disodium	P(O)(O)(=O)[C@H]1O[C@@H]1C	Ye, X. et al., 2014. A pharmacological network for lifespan extension in Caenorhabditis elegans. Aging cell, 13(2), pp.206–215.	NEGATIVE
(±)-2-Amino-3-phosphonopropionic acid	P(O)(O)(=O)C[C@@H](N)C(O)=O	Ye, X. et al., 2014. A pharmacological network for lifespan extension in Caenorhabditis elegans. Aging cell, 13(2), pp.206–215.	NEGATIVE
Phosphonoacetic acid	P(O)(O)(=O)CC(O)=O	Ye, X. et al., 2014. A pharmacological network for lifespan extension in Caenorhabditis elegans. Aging cell, 13(2), pp.206–215.	NEGATIVE
(±)-2-Amino-4-phosphonobutyric acid	P(O)(O)(=O)CC[C@@H](N)C(O)=O	Ye, X. et al., 2014. A pharmacological network for lifespan extension in Caenorhabditis elegans. Aging cell, 13(2), pp.206–215.	NEGATIVE
Phenylbenzene-omega-phosphono-alpha-amino acid	P(O)(O)(=O)Cc1ccccc1-c1cc(ccc1)C[C@@H](N)C(O)=O	Ye, X. et al., 2014. A pharmacological network for lifespan extension in Caenorhabditis elegans. Aging cell, 13(2), pp.206–215.	NEGATIVE
(S)-MAP4 hydrochloride	P(O)(O)(=O)CCC(C(O)=O)(C)C	Ye, X. et al., 2014. A pharmacological network for lifespan extension in Caenorhabditis elegans. Aging cell, 13(2), pp.206–215.	NEGATIVE
(±)-2-Amino-5-phosphonopentanoic acid	P(O)(O)(=O)CCC[C@@H](N)C(O)=O	Ye, X. et al., 2014. A pharmacological network for lifespan extension in Caenorhabditis elegans. Aging cell, 13(2), pp.206–215.	NEGATIVE
(±)-2-Amino-7-phosphonoheptanoic acid	P(O)(O)(=O)CCCCC[C@@H](N)C(O)=O	Ye, X. et al., 2014. A pharmacological network for lifespan extension in Caenorhabditis elegans. Aging cell, 13(2), pp.206–215.	NEGATIVE
3-Aminopropylphosphonic acid	P(O)(O)(=O)CCCN	Ye, X. et al., 2014. A pharmacological network for lifespan extension in Caenorhabditis elegans. Aging cell, 13(2), pp.206–215.	NEGATIVE
(±)-CPP	P(O)(O)(=O)CCCN1C[C@H](NCC1)C(O)=O	Ye, X. et al., 2014. A pharmacological network for lifespan extension in Caenorhabditis elegans. Aging cell, 13(2), pp.206–215.	NEGATIVE
ATPO	P(O)(O)(=O)COc1noc(C(C)(C)C)c1C[C@@H](N)C(O)=O	Ye, X. et al., 2014. A pharmacological network for lifespan extension in Caenorhabditis elegans. Aging cell, 13(2), pp.206–215.	NEGATIVE
MRS 2179	P(O[C@@H]1C[C@H](O[C@@H]1COP(O)(O)=O)n1c2ncnc(NC)c2nc1)(O)(O)=O	Ye, X. et al., 2014. A pharmacological network for lifespan extension in Caenorhabditis elegans. Aging cell, 13(2), pp.206–215.	NEGATIVE
Phosphoramidon disodium	P(O[C@H]1O[C@H](C)[C@@H](O)[C@@H](O)[C@H]1O)(O)(=O)N[C@H](CC(C)C)C(=O)N[C@H](Cc1c2c([nH]c1)cccc2)C(O)=O	Ye, X. et al., 2014. A pharmacological network for lifespan extension in Caenorhabditis elegans. Aging cell, 13(2), pp.206–215.	NEGATIVE
O-Phospho-L-serine	P(OC[C@@H](N)C(O)=O)(O)(O)=O	Ye, X. et al., 2014. A pharmacological network for lifespan extension in Caenorhabditis elegans. Aging cell, 13(2), pp.206–215.	NEGATIVE
NADPH tetrasodium	P(OC[C@H]1O[C@H](N2C=C(CC=C2)C(=O)N)[C@@H](O)[C@H]1O)(OP(OC[C@H]1O[C@H](n2c3ncnc(N)c3nc2)[C@H](OP(O)(O)=O)[C@@H]1O)(O)=O)(O)=O	Ye, X. et al., 2014. A pharmacological network for lifespan extension in Caenorhabditis elegans. Aging cell, 13(2), pp.206–215.	NEGATIVE
Citicoline sodium	P(OC[C@H]1O[C@H](N2C=CC(=NC2=O)N)[C@H](O)[C@@H]1O)(OP(OCC[N+](C)(C)C)(O)=O)(=O)[O-]	Ye, X. et al., 2014. A pharmacological network for lifespan extension in Caenorhabditis elegans. Aging cell, 13(2), pp.206–215.	NEGATIVE
Uridine 5'-diphosphate sodium	P(OC[C@H]1O[C@H](N2C=CC(=O)NC2=O)[C@@H](O)[C@H]1O)(OP(O)(O)=O)(O)=O	Ye, X. et al., 2014. A pharmacological network for lifespan extension in Caenorhabditis elegans. Aging cell, 13(2), pp.206–215.	NEGATIVE
Alpha,beta-Methylene adenosine 5'-triphosphate dilithium	P(OC[C@H]1O[C@H](n2c3ncnc(N)c3nc2)[C@@H](O)[C@H]1O)(O)(=O)CP(OP(O)(O)=O)(O)=O	Ye, X. et al., 2014. A pharmacological network for lifespan extension in Caenorhabditis elegans. Aging cell, 13(2), pp.206–215.	NEGATIVE
P1,P4-Di(adenosine-5')tetraphosphate triammonium	P(OC[C@H]1O[C@H](n2c3ncnc(N)c3nc2)[C@H](O)[C@@H]1O)(OP(OP(OP(OC[C@H]1O[C@H](n2c3ncnc(N)c3nc2)[C@@H](O)[C@H]1O)(O)=O)(O)=O)(O)=O)(O)=O	Ye, X. et al., 2014. A pharmacological network for lifespan extension in Caenorhabditis elegans. Aging cell, 13(2), pp.206–215.	NEGATIVE
ET-18-OCH3	P(OCC[N+](C)(C)C)(OC[C@H](OC)COCCCCCCCCCCCCCCCCCC)(=O)[O-]	Ye, X. et al., 2014. A pharmacological network for lifespan extension in Caenorhabditis elegans. Aging cell, 13(2), pp.206–215.	NEGATIVE
Rac-2-Ethoxy-3-hexadecanamido-1-propylphosphocholine	P(OCC[N+](C)(C)C)(OC[C@H](OCC)CNC(=O)CCCCCCCCCCCCCCC)(=O)[O-]	Ye, X. et al., 2014. A pharmacological network for lifespan extension in Caenorhabditis elegans. Aging cell, 13(2), pp.206–215.	NEGATIVE
Rac-2-Ethoxy-3-octadecanamido-1-propylphosphocholine	P(OCC[N+](C)(C)C)(OC[C@H](OCC)CNC(=O)CCCCCCCCCCCCCCCCC)(=O)[O-]	Ye, X. et al., 2014. A pharmacological network for lifespan extension in Caenorhabditis elegans. Aging cell, 13(2), pp.206–215.	NEGATIVE
MRS 2159	P(OCC=1/C(/N=C(C)C(=O)C=1C=O)=N/Nc1ccc(cc1)C(O)=O)(O)(O)=O	Ye, X. et al., 2014. A pharmacological network for lifespan extension in Caenorhabditis elegans. Aging cell, 13(2), pp.206–215.	NEGATIVE
Tetraisopropyl pyrophosphoramide	P(OP(=O)(NC(C)C)NC(C)C)(=O)(NC(C)C)NC(C)C	Ye, X. et al., 2014. A pharmacological network for lifespan extension in Caenorhabditis elegans. Aging cell, 13(2), pp.206–215.	NEGATIVE
Adenosine 3',5'-cyclic monophosphate	P1(OC[C@H]2O[C@H](n3c4ncnc(N)c4nc3)[C@H](O)[C@@H]2O1)(O)=O	Ye, X. et al., 2014. A pharmacological network for lifespan extension in Caenorhabditis elegans. Aging cell, 13(2), pp.206–215.	NEGATIVE
U0126	S(\C(\N)=C(\C(=C(\Sc1ccccc1N)/N)\C#N)/C#N)c1ccccc1N	Ye, X. et al., 2014. A pharmacological network for lifespan extension in Caenorhabditis elegans. Aging cell, 13(2), pp.206–215.	NEGATIVE
S-Methyl-L-thiocitrulline acetate	S(\C(=N\CCC[C@@H](N)C(O)=O)\N)C	Ye, X. et al., 2014. A pharmacological network for lifespan extension in Caenorhabditis elegans. Aging cell, 13(2), pp.206–215.	NEGATIVE
Bay 11-7085	S(=O)(=O)(\C=C\C#N)c1ccc(cc1)C(C)(C)C	Ye, X. et al., 2014. A pharmacological network for lifespan extension in Caenorhabditis elegans. Aging cell, 13(2), pp.206–215.	NEGATIVE
Tiapride hydrochloride	S(=O)(=O)(C)c1cc(C(=O)NCCN(CC)CC)c(OC)cc1	Ye, X. et al., 2014. A pharmacological network for lifespan extension in Caenorhabditis elegans. Aging cell, 13(2), pp.206–215.	NEGATIVE
Sulindac sulfone	S(=O)(=O)(C)c1ccc(cc1)\C=C/1\c2c(cc(F)cc2)C(CC(O)=O)=C\1C	Ye, X. et al., 2014. A pharmacological network for lifespan extension in Caenorhabditis elegans. Aging cell, 13(2), pp.206–215.	NEGATIVE
L-368,899	S(=O)(=O)(CC[C@H](N)C(=O)N[C@H]1C[C@@H]2CCC1(CS(=O)(=O)N1CCN(CC1)c1ccccc1C)C2(C)C)C	Ye, X. et al., 2014. A pharmacological network for lifespan extension in Caenorhabditis elegans. Aging cell, 13(2), pp.206–215.	NEGATIVE
SU 6656	S(=O)(=O)(N(C)C)c1cc\2c(NC(=O)/C/2=C\c2[nH]c3CCCCc3c2)cc1	Ye, X. et al., 2014. A pharmacological network for lifespan extension in Caenorhabditis elegans. Aging cell, 13(2), pp.206–215.	NEGATIVE
Pifithrin-mu	S(=O)(=O)(N)C#Cc1ccccc1	Ye, X. et al., 2014. A pharmacological network for lifespan extension in Caenorhabditis elegans. Aging cell, 13(2), pp.206–215.	NEGATIVE
NBQX disodium	S(=O)(=O)(N)c1c2c(c3nc([O-])c([O-])nc3cc2[N+](=O)[O-])ccc1	Ye, X. et al., 2014. A pharmacological network for lifespan extension in Caenorhabditis elegans. Aging cell, 13(2), pp.206–215.	NEGATIVE
Bumetanide	S(=O)(=O)(N)c1cc(cc(NCCCC)c1Oc1ccccc1)C(O)=O	Ye, X. et al., 2014. A pharmacological network for lifespan extension in Caenorhabditis elegans. Aging cell, 13(2), pp.206–215.	NEGATIVE
Mesulergine hydrochloride	S(=O)(=O)(N[C@H]1C[C@@H]2[C@@H](N(C1)C)Cc1c3c2cccc3n(c1)C)N(C)C	Ye, X. et al., 2014. A pharmacological network for lifespan extension in Caenorhabditis elegans. Aging cell, 13(2), pp.206–215.	NEGATIVE
1-(5-Isoquinolinylsulfonyl)-3-methylpiperazine dihydrochloride	S(=O)(=O)(N1C[C@H](NCC1)C)c1c2c(ccc1)cncc2	Ye, X. et al., 2014. A pharmacological network for lifespan extension in Caenorhabditis elegans. Aging cell, 13(2), pp.206–215.	NEGATIVE
SB 269970 hydrochloride	S(=O)(=O)(N1CCC[C@H]1CCN1CCC(CC1)C)c1cc(O)ccc1	Ye, X. et al., 2014. A pharmacological network for lifespan extension in Caenorhabditis elegans. Aging cell, 13(2), pp.206–215.	NEGATIVE
1-(5-Isoquinolinylsulfonyl)-2-methylpiperazine dihydrochloride	S(=O)(=O)(N1CCNC[C@H]1C)c1c2c(ccc1)cncc2	Ye, X. et al., 2014. A pharmacological network for lifespan extension in Caenorhabditis elegans. Aging cell, 13(2), pp.206–215.	NEGATIVE
HA-100	S(=O)(=O)(N1CCNCC1)c1c2c(ccc1)cncc2	Ye, X. et al., 2014. A pharmacological network for lifespan extension in Caenorhabditis elegans. Aging cell, 13(2), pp.206–215.	NEGATIVE
Acetohexamide	S(=O)(=O)(NC(=O)NC1CCCCC1)c1ccc(cc1)C(=O)C	Ye, X. et al., 2014. A pharmacological network for lifespan extension in Caenorhabditis elegans. Aging cell, 13(2), pp.206–215.	NEGATIVE
Glipizide	S(=O)(=O)(NC(=O)NC1CCCCC1)c1ccc(cc1)CCNC(=O)c1ncc(nc1)C	Ye, X. et al., 2014. A pharmacological network for lifespan extension in Caenorhabditis elegans. Aging cell, 13(2), pp.206–215.	NEGATIVE
Tolbutamide	S(=O)(=O)(NC(=O)NCCCC)c1ccc(cc1)C	Ye, X. et al., 2014. A pharmacological network for lifespan extension in Caenorhabditis elegans. Aging cell, 13(2), pp.206–215.	NEGATIVE
Tolazamide	S(=O)(=O)(NC(=O)NN1CCCCCC1)c1ccc(cc1)C	Ye, X. et al., 2014. A pharmacological network for lifespan extension in Caenorhabditis elegans. Aging cell, 13(2), pp.206–215.	NEGATIVE
A-315456	S(=O)(=O)(Nc1cc(ccc1)C(c1[nH]cnc1)=C1CCCCC1)CC	Ye, X. et al., 2014. A pharmacological network for lifespan extension in Caenorhabditis elegans. Aging cell, 13(2), pp.206–215.	NEGATIVE
Amsacrine hydrochloride	S(=O)(=O)(Nc1cc(OC)c(Nc2c3c(nc4c2cccc4)cccc3)cc1)C	Ye, X. et al., 2014. A pharmacological network for lifespan extension in Caenorhabditis elegans. Aging cell, 13(2), pp.206–215.	NEGATIVE
Nimesulide	S(=O)(=O)(Nc1ccc([N+](=O)[O-])cc1Oc1ccccc1)C	Ye, X. et al., 2014. A pharmacological network for lifespan extension in Caenorhabditis elegans. Aging cell, 13(2), pp.206–215.	NEGATIVE
(±)-Sotalol hydrochloride	S(=O)(=O)(Nc1ccc(cc1)[C@H](O)CNC(C)C)C	Ye, X. et al., 2014. A pharmacological network for lifespan extension in Caenorhabditis elegans. Aging cell, 13(2), pp.206–215.	NEGATIVE
Sulfaphenazole	S(=O)(=O)(Nc1n(ncc1)-c1ccccc1)c1ccc(N)cc1	Ye, X. et al., 2014. A pharmacological network for lifespan extension in Caenorhabditis elegans. Aging cell, 13(2), pp.206–215.	NEGATIVE
Ro 04-6790 dihydrochloride	S(=O)(=O)(Nc1nc(nc(NC)c1)NC)c1ccc(N)cc1	Ye, X. et al., 2014. A pharmacological network for lifespan extension in Caenorhabditis elegans. Aging cell, 13(2), pp.206–215.	NEGATIVE
H-9 dihydrochloride	S(=O)(=O)(NCCN)c1c2c(ccc1)cncc2	Ye, X. et al., 2014. A pharmacological network for lifespan extension in Caenorhabditis elegans. Aging cell, 13(2), pp.206–215.	NEGATIVE
HA-1004 hydrochloride	S(=O)(=O)(NCCN=C(N)N)c1c2c(ccc1)cncc2	Ye, X. et al., 2014. A pharmacological network for lifespan extension in Caenorhabditis elegans. Aging cell, 13(2), pp.206–215.	NEGATIVE
GR 113808	S(=O)(=O)(NCCN1CCC(CC1)COC(=O)c1c2c(n(c1)C)cccc2)C	Ye, X. et al., 2014. A pharmacological network for lifespan extension in Caenorhabditis elegans. Aging cell, 13(2), pp.206–215.	NEGATIVE
GR 125487 sulfamate salt	S(=O)(=O)(NCCN1CCC(CC1)COC(=O)c1c2cc(F)ccc2[nH]c1OC)C	Ye, X. et al., 2014. A pharmacological network for lifespan extension in Caenorhabditis elegans. Aging cell, 13(2), pp.206–215.	NEGATIVE
H-8 dihydrochloride	S(=O)(=O)(NCCNC)c1c2c(ccc1)cncc2	Ye, X. et al., 2014. A pharmacological network for lifespan extension in Caenorhabditis elegans. Aging cell, 13(2), pp.206–215.	NEGATIVE
Sulindac	S(=O)(C)c1ccc(cc1)\C=C/1\c2c(cc(F)cc2)C(CC(O)=O)=C\1C	Ye, X. et al., 2014. A pharmacological network for lifespan extension in Caenorhabditis elegans. Aging cell, 13(2), pp.206–215.	NEGATIVE
Lansoprazole	S(=O)(Cc1nccc(OCC(F)(F)F)c1C)c1[nH]c2c(n1)cccc2	Ye, X. et al., 2014. A pharmacological network for lifespan extension in Caenorhabditis elegans. Aging cell, 13(2), pp.206–215.	NEGATIVE
Fulvestrant	S(=O)(CCCC(F)(F)C(F)(F)F)CCCCCCCCC[C@@H]1[C@H]2[C@@H]3CC[C@H](O)C3(CC[C@H]2c2c(cc(O)cc2)C1)C	Ye, X. et al., 2014. A pharmacological network for lifespan extension in Caenorhabditis elegans. Aging cell, 13(2), pp.206–215.	NEGATIVE
Spironolactone	S(C(=O)C)[C@H]1[C@H]2[C@@H]3CCC4(OC(=O)CC4)C3(CC[C@@H]2C2(C(=CC(=O)CC2)C1)C)C	Ye, X. et al., 2014. A pharmacological network for lifespan extension in Caenorhabditis elegans. Aging cell, 13(2), pp.206–215.	NEGATIVE
Acetylthiocholine chloride	S(C(=O)C)CC[N+](C)(C)C	Ye, X. et al., 2014. A pharmacological network for lifespan extension in Caenorhabditis elegans. Aging cell, 13(2), pp.206–215.	NEGATIVE
MRS 1523	S(C(=O)c1c(CCC)c(C(OCCC)=O)c(nc1CC)-c1ccccc1)CC	Ye, X. et al., 2014. A pharmacological network for lifespan extension in Caenorhabditis elegans. Aging cell, 13(2), pp.206–215.	NEGATIVE
GW7647	S(C(C(O)=O)(C)C)c1ccc(cc1)CCN(CCCCC1CCCCC1)C(=O)NC1CCCCC1	Ye, X. et al., 2014. A pharmacological network for lifespan extension in Caenorhabditis elegans. Aging cell, 13(2), pp.206–215.	NEGATIVE
S-Methylisothiourea hemisulfate	S(C(N)=N)C	Ye, X. et al., 2014. A pharmacological network for lifespan extension in Caenorhabditis elegans. Aging cell, 13(2), pp.206–215.	NEGATIVE
Enoximone	S(C)c1ccc(cc1)C(=O)C=1NC(=O)NC=1C	Ye, X. et al., 2014. A pharmacological network for lifespan extension in Caenorhabditis elegans. Aging cell, 13(2), pp.206–215.	NEGATIVE
2-Methylthioadenosine diphosphate trisodium	S(C)c1nc(N)c2ncn(c2n1)[C@H]1O[C@H](COP(OP(O)(O)=O)(O)=O)[C@H](O)[C@@H]1O	Ye, X. et al., 2014. A pharmacological network for lifespan extension in Caenorhabditis elegans. Aging cell, 13(2), pp.206–215.	NEGATIVE
2-Methylthioadenosine triphosphate tetrasodium	S(C)c1nc(N)c2ncn(c2n1)[C@H]1O[C@H](COP(OP(OP(O)(O)=O)(O)=O)(O)=O)[C@H](O)[C@@H]1O	Ye, X. et al., 2014. A pharmacological network for lifespan extension in Caenorhabditis elegans. Aging cell, 13(2), pp.206–215.	NEGATIVE
Farnesylthiosalicylic acid	S(C\C=C(/CC\C=C(\CCC=C(C)C)/C)\C)c1ccccc1C(O)=O	Ye, X. et al., 2014. A pharmacological network for lifespan extension in Caenorhabditis elegans. Aging cell, 13(2), pp.206–215.	NEGATIVE
BU99006	S(C#N)c1cc2cc(oc2cc1)C=1NCCN=1	Ye, X. et al., 2014. A pharmacological network for lifespan extension in Caenorhabditis elegans. Aging cell, 13(2), pp.206–215.	NEGATIVE
Azathioprine	S(c1n(cnc1[N+](=O)[O-])C)c1ncnc2nc[nH]c12	Ye, X. et al., 2014. A pharmacological network for lifespan extension in Caenorhabditis elegans. Aging cell, 13(2), pp.206–215.	NEGATIVE
S-(p-Azidophenacyl)glutathione	S(CC(=O)c1ccc(N=[N+]=[N-])cc1)C[C@@H](NC(=O)CC[C@@H](N)C(O)=O)C(=O)NCC(O)=O	Ye, X. et al., 2014. A pharmacological network for lifespan extension in Caenorhabditis elegans. Aging cell, 13(2), pp.206–215.	NEGATIVE
S-Ethylisothiourea hydrobromide	S(CC)C(N)=N	Ye, X. et al., 2014. A pharmacological network for lifespan extension in Caenorhabditis elegans. Aging cell, 13(2), pp.206–215.	NEGATIVE
S-(4-Nitrobenzyl)-6-thioguanosine	S(Cc1ccc([N+](=O)[O-])cc1)c1nc(nc2n(cnc12)[C@H]1O[C@H](CO)[C@H](O)[C@@H]1O)N	Ye, X. et al., 2014. A pharmacological network for lifespan extension in Caenorhabditis elegans. Aging cell, 13(2), pp.206–215.	NEGATIVE
S-(4-Nitrobenzyl)-6-thioinosine	S(Cc1ccc([N+](=O)[O-])cc1)c1ncnc2n(cnc12)[C@H]1O[C@H](CO)[C@H](O)[C@@H]1O	Ye, X. et al., 2014. A pharmacological network for lifespan extension in Caenorhabditis elegans. Aging cell, 13(2), pp.206–215.	NEGATIVE
Cimetidine	S(Cc1nc[nH]c1C)CCN\C(=N/C)\NC#N	Ye, X. et al., 2014. A pharmacological network for lifespan extension in Caenorhabditis elegans. Aging cell, 13(2), pp.206–215.	NEGATIVE
Ranitidine hydrochloride	S(Cc1oc(cc1)CN(C)C)CCN\C(\NC)=C\[N+](=O)[O-]	Ye, X. et al., 2014. A pharmacological network for lifespan extension in Caenorhabditis elegans. Aging cell, 13(2), pp.206–215.	NEGATIVE
Imetit dihydrobromide	S(CCc1[nH]cnc1)C(N)=N	Ye, X. et al., 2014. A pharmacological network for lifespan extension in Caenorhabditis elegans. Aging cell, 13(2), pp.206–215.	NEGATIVE
1,3-PBIT dihydrobromide	S(CCc1cc(ccc1)CCSC(N)=N)C(N)=N	Ye, X. et al., 2014. A pharmacological network for lifespan extension in Caenorhabditis elegans. Aging cell, 13(2), pp.206–215.	NEGATIVE
1,4-PBIT dihydrobromide	S(CCc1ccc(cc1)CCSC(N)=N)C(N)=N	Ye, X. et al., 2014. A pharmacological network for lifespan extension in Caenorhabditis elegans. Aging cell, 13(2), pp.206–215.	NEGATIVE
Tetradecylthioacetic acid	S(CCCCCCCCCCCCCC)CC(O)=O	Ye, X. et al., 2014. A pharmacological network for lifespan extension in Caenorhabditis elegans. Aging cell, 13(2), pp.206–215.	NEGATIVE
SKF 91488 dihydrochloride	S(CCCCN(C)C)C(N)=N	Ye, X. et al., 2014. A pharmacological network for lifespan extension in Caenorhabditis elegans. Aging cell, 13(2), pp.206–215.	NEGATIVE
2-(2-Aminoethyl)isothiourea dihydrobromide	S(CCN)C(N)=N	Ye, X. et al., 2014. A pharmacological network for lifespan extension in Caenorhabditis elegans. Aging cell, 13(2), pp.206–215.	NEGATIVE
2,6-Difluoro-4-[2-(phenylsulfonylamino)ethylthio]phenoxyacetamide	S(CCNS(=O)(=O)c1ccccc1)c1cc(F)c(OCC(=O)N)c(F)c1	Ye, X. et al., 2014. A pharmacological network for lifespan extension in Caenorhabditis elegans. Aging cell, 13(2), pp.206–215.	NEGATIVE
NSC 95397	S(CCO)C1=C(SCCO)C(=O)c2c(cccc2)C1=O	Ye, X. et al., 2014. A pharmacological network for lifespan extension in Caenorhabditis elegans. Aging cell, 13(2), pp.206–215.	NEGATIVE
FSCPX	S(F)(=O)(=O)c1ccc(cc1)C(OCCCN1c2nc([nH]c2C(=O)N(CCC)C1=O)C1CCCC1)=O	Ye, X. et al., 2014. A pharmacological network for lifespan extension in Caenorhabditis elegans. Aging cell, 13(2), pp.206–215.	NEGATIVE
4-(2-Aminoethyl)benzenesulfonyl fluoride hydrochloride	S(F)(=O)(=O)c1ccc(cc1)CCN	Ye, X. et al., 2014. A pharmacological network for lifespan extension in Caenorhabditis elegans. Aging cell, 13(2), pp.206–215.	NEGATIVE
S-Nitroso-N-acetylpenicillamine	S(N=O)C([C@H](NC(=O)C)C(O)=O)(C)C	Ye, X. et al., 2014. A pharmacological network for lifespan extension in Caenorhabditis elegans. Aging cell, 13(2), pp.206–215.	NEGATIVE
S-Nitrosoglutathione	S(N=O)C[C@@H](NC(=O)CC[C@@H](N)C(O)=O)C(=O)NCC(O)=O	Ye, X. et al., 2014. A pharmacological network for lifespan extension in Caenorhabditis elegans. Aging cell, 13(2), pp.206–215.	NEGATIVE
Suramin hexasodium	S(O)(=O)(=O)c1c2c(cc(S(O)(=O)=O)c1)c(S(O)(=O)=O)ccc2NC(=O)c1cc(NC(=O)c2cc(NC(=O)Nc3cc(ccc3)C(=O)Nc3cc(ccc3C)C(=O)Nc3c4c(cc(S(O)(=O)=O)cc4S(O)(=O)=O)c(S(O)(=O)=O)cc3)ccc2)c(cc1)C	Ye, X. et al., 2014. A pharmacological network for lifespan extension in Caenorhabditis elegans. Aging cell, 13(2), pp.206–215.	NEGATIVE
NF 023	S(O)(=O)(=O)c1c2c(cc(S(O)(=O)=O)c1)c(S(O)(=O)=O)ccc2NC(=O)c1cc(NC(=O)Nc2cc(ccc2)C(=O)Nc2c3c(cc(S(O)(=O)=O)cc3S(O)(=O)=O)c(S(O)(=O)=O)cc2)ccc1	Ye, X. et al., 2014. A pharmacological network for lifespan extension in Caenorhabditis elegans. Aging cell, 13(2), pp.206–215.	NEGATIVE
PPADS	S(O)(=O)(=O)c1cc(S(O)(=O)=O)ccc1N\N=C\1/N=C(C)C(=O)C(C=O)=C/1COP(O)(O)=O	Ye, X. et al., 2014. A pharmacological network for lifespan extension in Caenorhabditis elegans. Aging cell, 13(2), pp.206–215.	NEGATIVE
8-(p-Sulfophenyl)theophylline	S(O)(=O)(=O)c1ccc(cc1)-c1[nH]c2c(n1)N(C)C(=O)N(C)C2=O	Ye, X. et al., 2014. A pharmacological network for lifespan extension in Caenorhabditis elegans. Aging cell, 13(2), pp.206–215.	NEGATIVE
1,3-Dipropyl-8-p-sulfophenylxanthine	S(O)(=O)(=O)c1ccc(cc1)-c1[nH]c2c(n1)N(CCC)C(=O)N(CCC)C2=O	Ye, X. et al., 2014. A pharmacological network for lifespan extension in Caenorhabditis elegans. Aging cell, 13(2), pp.206–215.	NEGATIVE
1-Allyl-3,7-dimethyl-8-p-sulfophenylxanthine	S(O)(=O)(=O)c1ccc(cc1)-c1nc2N(C)C(=O)N(CC=C)C(=O)c2n1C	Ye, X. et al., 2014. A pharmacological network for lifespan extension in Caenorhabditis elegans. Aging cell, 13(2), pp.206–215.	NEGATIVE
Piperidine-4-sulphonic acid	S(O)(=O)(=O)C1CCNCC1	Ye, X. et al., 2014. A pharmacological network for lifespan extension in Caenorhabditis elegans. Aging cell, 13(2), pp.206–215.	NEGATIVE
3-Amino-1-propanesulfonic acid sodium	S(O)(=O)(=O)CCCN	Ye, X. et al., 2014. A pharmacological network for lifespan extension in Caenorhabditis elegans. Aging cell, 13(2), pp.206–215.	NEGATIVE
Sodium Taurocholate	S(O)(=O)(=O)CCNC(=O)CC[C@@H](C)[C@@H]1CC[C@H]2[C@@H]3[C@@H](C[C@H](O)C12C)C1([C@H](C[C@H](O)CC1)C[C@@H]3O)C	Ye, X. et al., 2014. A pharmacological network for lifespan extension in Caenorhabditis elegans. Aging cell, 13(2), pp.206–215.	NEGATIVE
gamma-D-Glutamylaminomethylsulfonic acid	S(O)(=O)(=O)CNC(=O)CC[C@@H](N)C(O)=O	Ye, X. et al., 2014. A pharmacological network for lifespan extension in Caenorhabditis elegans. Aging cell, 13(2), pp.206–215.	NEGATIVE
L-Cysteinesulfinic Acid	S(O)(=O)C[C@@H](N)C(O)=O	Ye, X. et al., 2014. A pharmacological network for lifespan extension in Caenorhabditis elegans. Aging cell, 13(2), pp.206–215.	NEGATIVE
Hypotaurine	S(O)(=O)CCN	Ye, X. et al., 2014. A pharmacological network for lifespan extension in Caenorhabditis elegans. Aging cell, 13(2), pp.206–215.	NEGATIVE
Dehydroisoandrosterone 3-sulfate sodium	S(O[C@H]1CC2=CC[C@H]3[C@@H]4CCC(=O)C4(CC[C@H]3C2(CC1)C)C)(O)(=O)=O	Ye, X. et al., 2014. A pharmacological network for lifespan extension in Caenorhabditis elegans. Aging cell, 13(2), pp.206–215.	NEGATIVE
MHPG sulfate potassium	S(Oc1ccc(cc1OC)[C@@H](O)CO)(O)(=O)=O	Ye, X. et al., 2014. A pharmacological network for lifespan extension in Caenorhabditis elegans. Aging cell, 13(2), pp.206–215.	NEGATIVE
Amifostine	S(P(O)(O)=O)CCNCCCN	Ye, X. et al., 2014. A pharmacological network for lifespan extension in Caenorhabditis elegans. Aging cell, 13(2), pp.206–215.	NEGATIVE
Tetraethylthiuram disulfide	S(SC(=S)N(CC)CC)C(=S)N(CC)CC	Ye, X. et al., 2014. A pharmacological network for lifespan extension in Caenorhabditis elegans. Aging cell, 13(2), pp.206–215.	NEGATIVE
L-Leucinethiol, oxidized dihydrochloride	S(SC[C@H](N)CC(C)C)C[C@@H](N)CC(C)C	Ye, X. et al., 2014. A pharmacological network for lifespan extension in Caenorhabditis elegans. Aging cell, 13(2), pp.206–215.	NEGATIVE
Cystamine dihydrochloride	S(SCCN)CCN	Ye, X. et al., 2014. A pharmacological network for lifespan extension in Caenorhabditis elegans. Aging cell, 13(2), pp.206–215.	NEGATIVE
TG003	S\1c2c(N(CC)/C/1=C/C(=O)C)cc(OC)cc2	Ye, X. et al., 2014. A pharmacological network for lifespan extension in Caenorhabditis elegans. Aging cell, 13(2), pp.206–215.	NEGATIVE
SCH-202676 hydrobromide	S\1N(C(=N/C/1=N\C)c1ccccc1)c1ccccc1	Ye, X. et al., 2014. A pharmacological network for lifespan extension in Caenorhabditis elegans. Aging cell, 13(2), pp.206–215.	NEGATIVE
Tyrphostin 47	S\C(\N)=C(\C=C/1\C=C(O)C(=O)C=C\1)/C#N	Ye, X. et al., 2014. A pharmacological network for lifespan extension in Caenorhabditis elegans. Aging cell, 13(2), pp.206–215.	NEGATIVE
Tyrphostin AG 879	S\C(\N)=C(\C=C1C=C(C(C)(C)C)C(=O)C(=C1)C(C)(C)C)/C#N	Ye, X. et al., 2014. A pharmacological network for lifespan extension in Caenorhabditis elegans. Aging cell, 13(2), pp.206–215.	NEGATIVE
Thio-NADP sodium	S=C(N)c1ccc[n+](c1)[C@H]1O[C@H](COP(OP(OC[C@H]2O[C@H](n3c4ncnc(N)c4nc3)[C@H](OP(O)(=O)[O-])[C@@H]2O)(O)=O)(O)=O)[C@H](O)[C@@H]1O	Ye, X. et al., 2014. A pharmacological network for lifespan extension in Caenorhabditis elegans. Aging cell, 13(2), pp.206–215.	NEGATIVE
Thioperamide maleate	S=C(NC1CCCCC1)N1CCC(CC1)c1[nH]cnc1	Ye, X. et al., 2014. A pharmacological network for lifespan extension in Caenorhabditis elegans. Aging cell, 13(2), pp.206–215.	NEGATIVE
Thiocitrulline	S=C(NCCC[C@@H](N)C(O)=O)N	Ye, X. et al., 2014. A pharmacological network for lifespan extension in Caenorhabditis elegans. Aging cell, 13(2), pp.206–215.	NEGATIVE
1-(4-Hydroxybenzyl)imidazole-2-thiol	S=C1NC=CN1Cc1ccc(O)cc1	Ye, X. et al., 2014. A pharmacological network for lifespan extension in Caenorhabditis elegans. Aging cell, 13(2), pp.206–215.	NEGATIVE
Diacylglycerol Kinase Inhibitor II	S=C1Nc2c(cccc2)C(=O)N1CCN1CCC(CC1)=C(c1ccc(F)cc1)c1ccc(F)cc1	Ye, X. et al., 2014. A pharmacological network for lifespan extension in Caenorhabditis elegans. Aging cell, 13(2), pp.206–215.	NEGATIVE
Piroxicam	S1(=O)(=O)N(C)C(C(=O)Nc2ncccc2)=C(O)c2c1cccc2	Ye, X. et al., 2014. A pharmacological network for lifespan extension in Caenorhabditis elegans. Aging cell, 13(2), pp.206–215.	NEGATIVE
(±)-AMT hydrochloride	S1[C@@H](CCN=C1N)C	Ye, X. et al., 2014. A pharmacological network for lifespan extension in Caenorhabditis elegans. Aging cell, 13(2), pp.206–215.	NEGATIVE
Cefmetazole sodium	S1[C@@H]2N(C(=O)C2(OC)NC(=O)CSCC#N)C(C(O)=O)=C(C1)CSc1nnnn1C	Ye, X. et al., 2014. A pharmacological network for lifespan extension in Caenorhabditis elegans. Aging cell, 13(2), pp.206–215.	NEGATIVE
Cephradine	S1[C@@H]2N(C(C(O)=O)=C(C1)C)C(=O)[C@@H]2NC(=O)[C@@H](N)C=1CC=CCC=1	Ye, X. et al., 2014. A pharmacological network for lifespan extension in Caenorhabditis elegans. Aging cell, 13(2), pp.206–215.	NEGATIVE
Cephalexin hydrate	S1[C@@H]2N(C(C(O)=O)=C(C1)C)C(=O)[C@@H]2NC(=O)[C@@H](N)c1ccccc1	Ye, X. et al., 2014. A pharmacological network for lifespan extension in Caenorhabditis elegans. Aging cell, 13(2), pp.206–215.	NEGATIVE
Cephalosporin C zinc salt	S1[C@@H]2N(C(C(O)=O)=C(C1)COC(=O)C)C(=O)[C@@H]2NC(=O)CCC[C@@H](N)C(O)=O	Ye, X. et al., 2014. A pharmacological network for lifespan extension in Caenorhabditis elegans. Aging cell, 13(2), pp.206–215.	NEGATIVE
Cephapirin sodium	S1[C@@H]2N(C(C(O)=O)=C(C1)COC(=O)C)C(=O)[C@@H]2NC(=O)CSc1ccncc1	Ye, X. et al., 2014. A pharmacological network for lifespan extension in Caenorhabditis elegans. Aging cell, 13(2), pp.206–215.	NEGATIVE
AF267B	S1[C@H](CC)C(=O)NC12CCN(CC2)C	Ye, X. et al., 2014. A pharmacological network for lifespan extension in Caenorhabditis elegans. Aging cell, 13(2), pp.206–215.	NEGATIVE
Cefsulodin sodium salt hydrate	S1[C@H]2N(C(C(O)=O)=C(C1)C[n+]1ccc(cc1)C(=O)N)C(=O)[C@@H]2NC(=O)[C@@H](S(=O)(=O)[O-])c1ccccc1	Ye, X. et al., 2014. A pharmacological network for lifespan extension in Caenorhabditis elegans. Aging cell, 13(2), pp.206–215.	NEGATIVE
Thiolactomycin	S1C(\C=C(\C=C)/C)(C)C(=O)C(C)=C1O	Ye, X. et al., 2014. A pharmacological network for lifespan extension in Caenorhabditis elegans. Aging cell, 13(2), pp.206–215.	NEGATIVE
Meloxicam sodium	s1c(cnc1NC(=O)C=1N(S(=O)(=O)c2c(cccc2)C=1O)C)C	Ye, X. et al., 2014. A pharmacological network for lifespan extension in Caenorhabditis elegans. Aging cell, 13(2), pp.206–215.	NEGATIVE
Acetazolamide	s1c(nnc1S(=O)(=O)N)NC(=O)C	Ye, X. et al., 2014. A pharmacological network for lifespan extension in Caenorhabditis elegans. Aging cell, 13(2), pp.206–215.	NEGATIVE
Cefazolin sodium	s1c(nnc1SCC=1CS[C@@H]2N(C=1C(O)=O)C(=O)[C@@H]2NC(=O)Cn1nnnc1)C	Ye, X. et al., 2014. A pharmacological network for lifespan extension in Caenorhabditis elegans. Aging cell, 13(2), pp.206–215.	NEGATIVE
L-162,313	s1c(S(=O)(=O)NC(OCCCC)=O)c(cc1CC(C)C)-c1ccc(cc1)Cn1c2nc(cc(c2nc1CC)C)C	Ye, X. et al., 2014. A pharmacological network for lifespan extension in Caenorhabditis elegans. Aging cell, 13(2), pp.206–215.	NEGATIVE
OXA-22 iodide	S1C[C@@H](O[C@H]1C)C[N+](C)(C)C	Ye, X. et al., 2014. A pharmacological network for lifespan extension in Caenorhabditis elegans. Aging cell, 13(2), pp.206–215.	NEGATIVE
Benoxathian hydrochloride	S1C[C@H](Oc2c1cccc2)CNCCOc1c(OC)cccc1OC	Ye, X. et al., 2014. A pharmacological network for lifespan extension in Caenorhabditis elegans. Aging cell, 13(2), pp.206–215.	NEGATIVE
Ritanserin	S1C=CN2C1=NC(C)=C(CCN1CCC(CC1)=C(c1ccc(F)cc1)c1ccc(F)cc1)C2=O	Ye, X. et al., 2014. A pharmacological network for lifespan extension in Caenorhabditis elegans. Aging cell, 13(2), pp.206–215.	NEGATIVE
AC-93253 iodide	s1c2c([n+](CC)c1\C=C\C=C\1/N(c3c(cccc3)C/1(C)C)C)cccc2	Ye, X. et al., 2014. A pharmacological network for lifespan extension in Caenorhabditis elegans. Aging cell, 13(2), pp.206–215.	NEGATIVE
Thiothixene hydrochloride	S1c2c(cc(S(=O)(=O)N(C)C)cc2)\C(\c2c1cccc2)=C\CCN1CCN(CC1)C	Ye, X. et al., 2014. A pharmacological network for lifespan extension in Caenorhabditis elegans. Aging cell, 13(2), pp.206–215.	NEGATIVE
SKF 89626	s1c2c(cc1)[C@@H](CNC2)c1cc(O)c(O)cc1	Ye, X. et al., 2014. A pharmacological network for lifespan extension in Caenorhabditis elegans. Aging cell, 13(2), pp.206–215.	NEGATIVE
Ketotifen fumarate	s1c2c(cc1)C(c1c(CC2=O)cccc1)=C1CCN(CC1)C	Ye, X. et al., 2014. A pharmacological network for lifespan extension in Caenorhabditis elegans. Aging cell, 13(2), pp.206–215.	NEGATIVE
Raloxifene hydrochloride	s1c2c(ccc(O)c2)c(C(=O)c2ccc(OCCN3CCCCC3)cc2)c1-c1ccc(O)cc1	Ye, X. et al., 2014. A pharmacological network for lifespan extension in Caenorhabditis elegans. Aging cell, 13(2), pp.206–215.	NEGATIVE
Benazoline oxalate	s1c2c(cccc2)c(CC=2NCCN=2)c1C	Ye, X. et al., 2014. A pharmacological network for lifespan extension in Caenorhabditis elegans. Aging cell, 13(2), pp.206–215.	NEGATIVE
Triflupromazine hydrochloride	S1c2c(N(c3c1cccc3)CCCN(C)C)cc(cc2)C(F)(F)F	Ye, X. et al., 2014. A pharmacological network for lifespan extension in Caenorhabditis elegans. Aging cell, 13(2), pp.206–215.	NEGATIVE
Promazine hydrochloride	S1c2c(N(c3c1cccc3)CCCN(C)C)cccc2	Ye, X. et al., 2014. A pharmacological network for lifespan extension in Caenorhabditis elegans. Aging cell, 13(2), pp.206–215.	NEGATIVE
Trifluoperazine dihydrochloride	S1c2c(N(c3c1cccc3)CCCN1CCN(CC1)C)cc(cc2)C(F)(F)F	Ye, X. et al., 2014. A pharmacological network for lifespan extension in Caenorhabditis elegans. Aging cell, 13(2), pp.206–215.	NEGATIVE
Fluphenazine dihydrochloride	S1c2c(N(c3c1cccc3)CCCN1CCN(CC1)CCO)cc(cc2)C(F)(F)F	Ye, X. et al., 2014. A pharmacological network for lifespan extension in Caenorhabditis elegans. Aging cell, 13(2), pp.206–215.	NEGATIVE
Diltiazem hydrochloride	S1c2c(N(CCN(C)C)C(=O)[C@H](OC(=O)C)[C@H]1c1ccc(OC)cc1)cccc2	Ye, X. et al., 2014. A pharmacological network for lifespan extension in Caenorhabditis elegans. Aging cell, 13(2), pp.206–215.	NEGATIVE
Fiduxosin hydrochloride	s1c2c(NC(=O)N(CCCCN3C[C@@H]4[C@H](C3)COc3c4c(OC)ccc3)C2=O)c2nc(cnc12)-c1ccccc1	Ye, X. et al., 2014. A pharmacological network for lifespan extension in Caenorhabditis elegans. Aging cell, 13(2), pp.206–215.	NEGATIVE
SKF 95282 dimaleate	s1c2c(nc1NCCCOc1cc(ccc1)CN1CCCCC1)cccc2	Ye, X. et al., 2014. A pharmacological network for lifespan extension in Caenorhabditis elegans. Aging cell, 13(2), pp.206–215.	NEGATIVE
SB 205384	s1c2C[C@@H](O)CCc2c2c1nc(C)c(C(OCC#CC)=O)c2N	Ye, X. et al., 2014. A pharmacological network for lifespan extension in Caenorhabditis elegans. Aging cell, 13(2), pp.206–215.	NEGATIVE
Riluzole	s1c2cc(OC(F)(F)F)ccc2nc1N	Ye, X. et al., 2014. A pharmacological network for lifespan extension in Caenorhabditis elegans. Aging cell, 13(2), pp.206–215.	NEGATIVE
Cefotaxime sodium	s1cc(nc1N)/C(=N\OC)/C(=O)N[C@@H]1[C@@H]2SCC(COC(=O)C)=C(N2C1=O)C(O)=O	Ye, X. et al., 2014. A pharmacological network for lifespan extension in Caenorhabditis elegans. Aging cell, 13(2), pp.206–215.	NEGATIVE
Ceftriaxone sodium	s1cc(nc1N)/C(=N\OC)/C(=O)N[C@@H]1[C@@H]2SCC(CSC3=NC(=O)C(=O)NN3C)=C(N2C1=O)C(O)=O	Ye, X. et al., 2014. A pharmacological network for lifespan extension in Caenorhabditis elegans. Aging cell, 13(2), pp.206–215.	NEGATIVE
Telenzepine dihydrochloride	s1cc2c(N(c3c(NC2=O)cccc3)C(=O)CN2CCN(CC2)C)c1C	Ye, X. et al., 2014. A pharmacological network for lifespan extension in Caenorhabditis elegans. Aging cell, 13(2), pp.206–215.	NEGATIVE
Nocodazole	s1cccc1C(=O)c1cc2[nH]c(nc2cc1)NC(OC)=O	Ye, X. et al., 2014. A pharmacological network for lifespan extension in Caenorhabditis elegans. Aging cell, 13(2), pp.206–215.	NEGATIVE
Cephalothin sodium	s1cccc1CC(=O)N[C@@H]1[C@@H]2SCC(COC(=O)C)=C(N2C1=O)C(O)=O	Ye, X. et al., 2014. A pharmacological network for lifespan extension in Caenorhabditis elegans. Aging cell, 13(2), pp.206–215.	NEGATIVE
Methapyrilene hydrochloride	s1cccc1CN(CCN(C)C)c1ncccc1	Ye, X. et al., 2014. A pharmacological network for lifespan extension in Caenorhabditis elegans. Aging cell, 13(2), pp.206–215.	NEGATIVE
BW 723C86	s1cccc1COc1cc2c([nH]cc2C[C@H](N)C)cc1	Ye, X. et al., 2014. A pharmacological network for lifespan extension in Caenorhabditis elegans. Aging cell, 13(2), pp.206–215.	NEGATIVE
Xylazine hydrochloride	S1CCCN=C1Nc1c(cccc1C)C	Ye, X. et al., 2014. A pharmacological network for lifespan extension in Caenorhabditis elegans. Aging cell, 13(2), pp.206–215.	NEGATIVE
Tetramisole hydrochloride	S1CCN2C[C@@H](N=C12)c1ccccc1	Ye, X. et al., 2014. A pharmacological network for lifespan extension in Caenorhabditis elegans. Aging cell, 13(2), pp.206–215.	NEGATIVE
1-Phenyl-3-(2-thiazolyl)-2-thiourea	s1ccnc1NC(=S)Nc1ccccc1	Ye, X. et al., 2014. A pharmacological network for lifespan extension in Caenorhabditis elegans. Aging cell, 13(2), pp.206–215.	NEGATIVE
Ro 41-1049 hydrochloride	s1cnc(C(=O)NCCN)c1-c1cc(F)ccc1	Ye, X. et al., 2014. A pharmacological network for lifespan extension in Caenorhabditis elegans. Aging cell, 13(2), pp.206–215.	NEGATIVE
SB 204741	s1nc(cc1NC(=O)Nc1cc2c(n(cc2)C)cc1)C	Ye, X. et al., 2014. A pharmacological network for lifespan extension in Caenorhabditis elegans. Aging cell, 13(2), pp.206–215.	NEGATIVE
S(-)-Timolol maleate	s1nc(N2CCOCC2)c(OC[C@H](O)CNC(C)(C)C)n1	Ye, X. et al., 2014. A pharmacological network for lifespan extension in Caenorhabditis elegans. Aging cell, 13(2), pp.206–215.	NEGATIVE
Ammonium pyrrolidinedithiocarbamate	SC(=S)N1CCCC1	Ye, X. et al., 2014. A pharmacological network for lifespan extension in Caenorhabditis elegans. Aging cell, 13(2), pp.206–215.	NEGATIVE
D-609 potassium	SC(=S)O[C@@H]1[C@@H]2[C@@H]3[C@H]([C@@H](C1)C2)CCC3	Ye, X. et al., 2014. A pharmacological network for lifespan extension in Caenorhabditis elegans. Aging cell, 13(2), pp.206–215.	NEGATIVE
DL-Thiorphan	SC[C@@H](Cc1ccccc1)C(=O)NCC(O)=O	Ye, X. et al., 2014. A pharmacological network for lifespan extension in Caenorhabditis elegans. Aging cell, 13(2), pp.206–215.	NEGATIVE
Captopril	SC[C@H](C(=O)N1CCC[C@@H]1C(O)=O)C	Ye, X. et al., 2014. A pharmacological network for lifespan extension in Caenorhabditis elegans. Aging cell, 13(2), pp.206–215.	NEGATIVE
Cysteamine hydrochloride	SCCN	Ye, X. et al., 2014. A pharmacological network for lifespan extension in Caenorhabditis elegans. Aging cell, 13(2), pp.206–215.	NEGATIVE
R(+)-UH-301 hydrochloride	Fc1c2c(C[C@H](N(CCC)CCC)CC2)c(O)cc1	Ye, X. et al., 2014. A pharmacological network for lifespan extension in Caenorhabditis elegans. Aging cell, 13(2), pp.206–215.	NEGATIVE
Cis-Azetidine-2,4-dicarboxylic acid	OC(=O)[C@H]1N[C@H](C1)C(O)=O	Ye, X. et al., 2014. A pharmacological network for lifespan extension in Caenorhabditis elegans. Aging cell, 13(2), pp.206–215.	NEGATIVE
(E)-4-amino-2-butenoic acid	OC(=O)\C=C\CN	Ye, X. et al., 2014. A pharmacological network for lifespan extension in Caenorhabditis elegans. Aging cell, 13(2), pp.206–215.	NEGATIVE
R(+)-3PPP hydrochloride	Oc1cc(ccc1)[C@H]1CCCN(C1)CCC	Ye, X. et al., 2014. A pharmacological network for lifespan extension in Caenorhabditis elegans. Aging cell, 13(2), pp.206–215.	NEGATIVE
Tyrphostin AG 527	Oc1cc(ccc1O)\C=C(\C(=O)N[C@H](C)c1ccccc1)/C#N	Ye, X. et al., 2014. A pharmacological network for lifespan extension in Caenorhabditis elegans. Aging cell, 13(2), pp.206–215.	NEGATIVE
(±)-Brompheniramine maleate	Brc1ccc(cc1)[C@@H](CCN(C)C)c1ncccc1	Ye, X. et al., 2014. A pharmacological network for lifespan extension in Caenorhabditis elegans. Aging cell, 13(2), pp.206–215.	NEGATIVE
(±) trans-U-50488 methanesulfonate	Clc1cc(ccc1Cl)CC(=O)N(C)[C@@H]1CCCC[C@H]1N1CCCC1	Ye, X. et al., 2014. A pharmacological network for lifespan extension in Caenorhabditis elegans. Aging cell, 13(2), pp.206–215.	NEGATIVE
(±)-Chlorpheniramine maleate	Clc1ccc(cc1)[C@@H](CCN(C)C)c1ncccc1	Ye, X. et al., 2014. A pharmacological network for lifespan extension in Caenorhabditis elegans. Aging cell, 13(2), pp.206–215.	NEGATIVE
(-)-Scopolamine methyl nitrate	O1[C@@H]2[C@@H]3[N+]([C@@H]([C@@H]12)CC(OC(=O)[C@H](CO)c1ccccc1)C3)(C)C	Ye, X. et al., 2014. A pharmacological network for lifespan extension in Caenorhabditis elegans. Aging cell, 13(2), pp.206–215.	NEGATIVE
(R)-(+)-WIN 55,212-2 mesylate	O1CCN(CC1)C[C@H]1n2c3c(cccc3OC1)c(C(=O)c1c3c(ccc1)cccc3)c2C	Ye, X. et al., 2014. A pharmacological network for lifespan extension in Caenorhabditis elegans. Aging cell, 13(2), pp.206–215.	NEGATIVE
(±)-Ibuprofen	OC(=O)[C@@H](C)c1ccc(cc1)CC(C)C	Ye, X. et al., 2014. A pharmacological network for lifespan extension in Caenorhabditis elegans. Aging cell, 13(2), pp.206–215.	NEGATIVE
(±)-Epinephrine hydrochloride	Oc1cc(ccc1O)[C@H](O)CNC	Ye, X. et al., 2014. A pharmacological network for lifespan extension in Caenorhabditis elegans. Aging cell, 13(2), pp.206–215.	NEGATIVE
(±)-Isoproterenol hydrochloride	Oc1cc(ccc1O)[C@H](O)CNC(C)C	Ye, X. et al., 2014. A pharmacological network for lifespan extension in Caenorhabditis elegans. Aging cell, 13(2), pp.206–215.	NEGATIVE
(±)-Sulpiride	S(=O)(=O)(N)c1cc(C(=O)NC[C@@H]2N(CCC2)CC)c(OC)cc1	Ye, X. et al., 2014. A pharmacological network for lifespan extension in Caenorhabditis elegans. Aging cell, 13(2), pp.206–215.	NEGATIVE
Diphenyleneiodonium chloride	[i+]1c2c(c3c1cccc3)cccc2	Ye, X. et al., 2014. A pharmacological network for lifespan extension in Caenorhabditis elegans. Aging cell, 13(2), pp.206–215.	NEGATIVE
Hexamethonium dichloride	[N+](CCCCCC[N+](C)(C)C)(C)(C)C	Ye, X. et al., 2014. A pharmacological network for lifespan extension in Caenorhabditis elegans. Aging cell, 13(2), pp.206–215.	NEGATIVE
Aurothioglucose	[S-][C@H]1O[C@H](CO)[C@@H](O)[C@@H](O)[C@H]1O	Ye, X. et al., 2014. A pharmacological network for lifespan extension in Caenorhabditis elegans. Aging cell, 13(2), pp.206–215.	NEGATIVE
Ebselen	[Se]1N(C(=O)c2c1cccc2)c1ccccc1	Ye, X. et al., 2014. A pharmacological network for lifespan extension in Caenorhabditis elegans. Aging cell, 13(2), pp.206–215.	NEGATIVE
UK 14,304	Brc1c2nccnc2ccc1NC=1NCCN=1	Ye, X. et al., 2014. A pharmacological network for lifespan extension in Caenorhabditis elegans. Aging cell, 13(2), pp.206–215.	NEGATIVE
7-Chloro-4-hydroxy-2-phenyl-1,8-naphthyridine	Clc1nc2NC(=CC(=O)c2cc1)c1ccccc1	Ye, X. et al., 2014. A pharmacological network for lifespan extension in Caenorhabditis elegans. Aging cell, 13(2), pp.206–215.	NEGATIVE
Trimipramine maleate	N(C[C@@H](CN1c2c(CCc3c1cccc3)cccc2)C)(C)C	Ye, X. et al., 2014. A pharmacological network for lifespan extension in Caenorhabditis elegans. Aging cell, 13(2), pp.206–215.	NEGATIVE
Quipazine, N-methyl-, dimaleate	n1c2c(ccc1N1CCN(CC1)C)cccc2	Ye, X. et al., 2014. A pharmacological network for lifespan extension in Caenorhabditis elegans. Aging cell, 13(2), pp.206–215.	NEGATIVE
Quipazine, 6-nitro-, maleate	O=[N+]([O-])c1cc2c(nc(N3CCNCC3)cc2)cc1	Ye, X. et al., 2014. A pharmacological network for lifespan extension in Caenorhabditis elegans. Aging cell, 13(2), pp.206–215.	NEGATIVE
Disopyramide phosphate	O=C(N)C(CCN(C(C)C)C(C)C)(c1ccccc1)c1ncccc1	Ye, X. et al., 2014. A pharmacological network for lifespan extension in Caenorhabditis elegans. Aging cell, 13(2), pp.206–215.	NEGATIVE
2',3'-didehydro-3'-deoxythymidine	O1[C@@H](C=C[C@H]1N1C=C(C)C(=O)NC1=O)CO	Ye, X. et al., 2014. A pharmacological network for lifespan extension in Caenorhabditis elegans. Aging cell, 13(2), pp.206–215.	NEGATIVE
GYKI 52895	O1c2c(OC1)cc1c(c2)C(=NN[C@@H](C1)C)c1ccc(N)cc1	Ye, X. et al., 2014. A pharmacological network for lifespan extension in Caenorhabditis elegans. Aging cell, 13(2), pp.206–215.	NEGATIVE
U-69593	O1CCCC12C[C@H](N1CCCC1)[C@H](N(C(=O)Cc1ccccc1)C)CC2	Ye, X. et al., 2014. A pharmacological network for lifespan extension in Caenorhabditis elegans. Aging cell, 13(2), pp.206–215.	NEGATIVE
L-carnosine	OC(=O)[C@H](NC(=O)CCN)Cc1[nH]cnc1	Ye, X. et al., 2014. A pharmacological network for lifespan extension in Caenorhabditis elegans. Aging cell, 13(2), pp.206–215.	NEGATIVE
DL-Cycloserine	O1NC(=O)[C@H](N)C1	Ye, X. et al., 2014. A pharmacological network for lifespan extension in Caenorhabditis elegans. Aging cell, 13(2), pp.206–215.	NEGATIVE
Cis-4-Aminocrotonic acid	OC(=O)\C=C/CN	Ye, X. et al., 2014. A pharmacological network for lifespan extension in Caenorhabditis elegans. Aging cell, 13(2), pp.206–215.	NEGATIVE
Protoporphyrin IX disodium	OC(=O)CCC=1C2=NC(=Cc3[nH]c(C=c4[nH]c(=CC5=NC(=C2)C(CCC(O)=O)=C5C)c(C)c4C=C)c(C)c3C=C)C=1C	Ye, X. et al., 2014. A pharmacological network for lifespan extension in Caenorhabditis elegans. Aging cell, 13(2), pp.206–215.	NEGATIVE
L-Methionine sulfoximine	S(=O)(=[NH])(CC[C@@H](N)C(O)=O)C	Ye, X. et al., 2014. A pharmacological network for lifespan extension in Caenorhabditis elegans. Aging cell, 13(2), pp.206–215.	NEGATIVE
DL-Buthionine-[S,R]-sulfoximine	S(=O)(=[NH])(CCCC)CC[C@@H](N)C(O)=O	Ye, X. et al., 2014. A pharmacological network for lifespan extension in Caenorhabditis elegans. Aging cell, 13(2), pp.206–215.	NEGATIVE
Zonisamide sodium	S(O)(=O)(=[NH])Cc1noc2c1cccc2	Ye, X. et al., 2014. A pharmacological network for lifespan extension in Caenorhabditis elegans. Aging cell, 13(2), pp.206–215.	NEGATIVE
PD 404,182	S1c2c(C=3N(CCCN=3)C1=N)cccc2	Ye, X. et al., 2014. A pharmacological network for lifespan extension in Caenorhabditis elegans. Aging cell, 13(2), pp.206–215.	NEGATIVE
Rauwolscine hydrochloride	O[C@H]1CC[C@H]2[C@H](C[C@@H]3N(CCc4c5c([nH]c34)cccc5)C2)[C@@H]1C(OC)=O	Ye, X. et al., 2014. A pharmacological network for lifespan extension in Caenorhabditis elegans. Aging cell, 13(2), pp.206–215.	NEGATIVE
Epibestatin hydrochloride	CC(C)C[C@@H](C(=O)O)NC(=O)[C@@H]([C@@H](CC1=CC=CC=C1)N)O	Ye, X. et al., 2014. A pharmacological network for lifespan extension in Caenorhabditis elegans. Aging cell, 13(2), pp.206–215.	NEGATIVE
Selegeline hydrochloride	N([C@@H](Cc1ccccc1)C)(CC#C)C	Ye, X. et al., 2014. A pharmacological network for lifespan extension in Caenorhabditis elegans. Aging cell, 13(2), pp.206–215.	NEGATIVE
Tacrine hydrochloride	n1c2c(CCCC2)c(N)c2c1cccc2	Ye, X. et al., 2014. A pharmacological network for lifespan extension in Caenorhabditis elegans. Aging cell, 13(2), pp.206–215.	NEGATIVE
Berbamine hydrochloride	O1c2c3[C@H](N(CCc3cc(OC)c2OC)C)Cc2cc(Oc3ccc(C[C@@H]4N(CCc5cc(OC)c1cc45)C)cc3)c(O)cc2	Lublin, A. et al., 2011. FDA-approved drugs that protect mammalian neurons from glucose toxicity slow aging dependent on cbp and protect against proteotoxicity. PloS one, 6(11), p.e27762.	NEGATIVE
Methacycline hydrochloride	OC=1[C@@H](N(C)C)[C@H]2[C@@](O)(C(=O)C=1C(=O)N)C(O)=C1[C@H]([C@@H]2O)C(c2c(C1=O)c(O)ccc2)=C	Lublin, A. et al., 2011. FDA-approved drugs that protect mammalian neurons from glucose toxicity slow aging dependent on cbp and protect against proteotoxicity. PloS one, 6(11), p.e27762.	NEGATIVE
Tranylcypromine sulfate	N[C@@H]1C[C@H]1c1ccccc1	Ye, X. et al., 2014. A pharmacological network for lifespan extension in Caenorhabditis elegans. Aging cell, 13(2), pp.206–215.	NEGATIVE
Phenytoin sodium salt	OC1=NC(=O)NC1(c1ccccc1)c1ccccc1	Ye, X. et al., 2014. A pharmacological network for lifespan extension in Caenorhabditis elegans. Aging cell, 13(2), pp.206–215.	NEGATIVE
Histamine	[nH]1cncc1CCN	Ye, X. et al., 2014. A pharmacological network for lifespan extension in Caenorhabditis elegans. Aging cell, 13(2), pp.206–215.	NEGATIVE
Beta-carotene	C1CCC(C)=C(\C=C\C(=C\C=C\C(=C\C=C\C=C(\C=C\C=C(\C=C\C=2C(CCCC=2C)(C)C)/C)/C)\C)\C)C1(C)C	Lashmanova et al (2015) Fucoxanthin increases lifespan of Drosophila melanogaster and Caenorhabditis elegan, .Pharmacol Res. 2015 Oct;100:228-41	NEGATIVE
25-azacoprostane	N(CCC[C@@H](C)[C@H]1CC[C@H]2[C@H]3[C@H](CC[C@]12C)[C@@]1([C@@H](CCCC1)CC3)C)(C)C	Cheong et al (2011),A potential biochemical mechanism underlying the influence of sterol deprivation stress on Caenorhabditis elegans longevity., J Biol Chem. 2011 Mar 4;286(9):7248-56.	NEGATIVE
Cholesterol	O[C@@H]1CC2=CC[C@H]3[C@@H]4CC[C@H]([C@@H](CCCC(C)C)C)[C@]4(CC[C@@H]3[C@]2(CC1)C)C	Cheong et al (2011),A potential biochemical mechanism underlying the influence of sterol deprivation stress on Caenorhabditis elegans longevity., J Biol Chem. 2011 Mar 4;286(9):7248-56.	NEGATIVE
Eicosapentaenoyl ethanolamide	OCCNC(=O)CCC\C=C/C\C=C/C\C=C/C\C=C/C\C=C/CC	Lucanic et al (2011) N-acylethanolamine signalling mediates the effect of diet on lifespan in Caenorhabditis elegans, Nature. 2011 May 12;473(7346):226-9.	NEGATIVE
5,8-Dimethyoxy-1-tetralone	O(C)c1c2c(CCCC2=O)c(OC)cc1	Hunt et al (2011), Extension of Lifespan in C. elegans by Naphthoquinones That Act through Stress Hormesis Mechanisms, PLoS One. 2011; 6(7): e21922.	NEGATIVE
7-Hydroxy-1-tetralone	Oc1cc2c(CCCC2=O)cc1	Hunt et al (2011), Extension of Lifespan in C. elegans by Naphthoquinones That Act through Stress Hormesis Mechanisms, PLoS One. 2011; 6(7): e21922.	NEGATIVE
Menadione	O=C1c2c(cccc2)C(=O)C=C1C	Hunt et al (2011), Extension of Lifespan in C. elegans by Naphthoquinones That Act through Stress Hormesis Mechanisms, PLoS One. 2011; 6(7): e21922.	NEGATIVE
D-malate	C([C@H](C(=O)[O-])O)C(=O)[O-]	Edwards et al (2015), Mechanisms of amino acid-mediated lifespan extension in Caenorhabditis elegans ,BMC Genet. 2015 Feb 3;16:8. doi: 10.1186/s12863-015-0167-2.	NEGATIVE
D-proline	OC(=O)[C@@H]1NCCC1	Edwards et al (2015), Mechanisms of amino acid-mediated lifespan extension in Caenorhabditis elegans ,BMC Genet. 2015 Feb 3;16:8. doi: 10.1186/s12863-015-0167-2.	NEGATIVE
L-aspartate	OC(=O)C[C@H](N)C(O)=O	Edwards et al (2015), Mechanisms of amino acid-mediated lifespan extension in Caenorhabditis elegans ,BMC Genet. 2015 Feb 3;16:8. doi: 10.1186/s12863-015-0167-2.	NEGATIVE
Phenylalanine	OC(=O)[C@H](N)Cc1ccccc1	Edwards et al (2015), Mechanisms of amino acid-mediated lifespan extension in Caenorhabditis elegans ,BMC Genet. 2015 Feb 3;16:8. doi: 10.1186/s12863-015-0167-2.	NEGATIVE
Urocanic acid	OC(=O)\C=C\c1[nH]cnc1	Edwards et al (2015), Mechanisms of amino acid-mediated lifespan extension in Caenorhabditis elegans ,BMC Genet. 2015 Feb 3;16:8. doi: 10.1186/s12863-015-0167-2.	NEGATIVE
Dihydroxyacetone	OCC(=O)CO	Edwards et al (2015), Mechanisms of amino acid-mediated lifespan extension in Caenorhabditis elegans ,BMC Genet. 2015 Feb 3;16:8. doi: 10.1186/s12863-015-0167-2.	NEGATIVE
Glyceraldehyde	OC[C@@H](O)C=O	Edwards et al (2015), Mechanisms of amino acid-mediated lifespan extension in Caenorhabditis elegans ,BMC Genet. 2015 Feb 3;16:8. doi: 10.1186/s12863-015-0167-2.	NEGATIVE
Glucuronolactone	O1[C@H]([C@@H](O)C=O)[C@H](O)[C@H](O)C1=O	Edwards et al (2015), Mechanisms of amino acid-mediated lifespan extension in Caenorhabditis elegans ,BMC Genet. 2015 Feb 3;16:8. doi: 10.1186/s12863-015-0167-2.	NEGATIVE
Propionate	OC(=O)CC	Edwards et al (2015), Mechanisms of amino acid-mediated lifespan extension in Caenorhabditis elegans ,BMC Genet. 2015 Feb 3;16:8. doi: 10.1186/s12863-015-0167-2.	NEGATIVE
Fructose	C([C@@H]1[C@H]([C@@H]([C@](O1)(CO)O)O)O)O	Edwards et al (2015), Mechanisms of amino acid-mediated lifespan extension in Caenorhabditis elegans ,BMC Genet. 2015 Feb 3;16:8. doi: 10.1186/s12863-015-0167-2.	NEGATIVE
L-glucose	C([C@H]1[C@@H]([C@H]([C@@H](C(O1)O)O)O)O)O	Edwards et al (2015), Mechanisms of amino acid-mediated lifespan extension in Caenorhabditis elegans ,BMC Genet. 2015 Feb 3;16:8. doi: 10.1186/s12863-015-0167-2.	NEGATIVE
Methanol	OC		NEGATIVE
Carbenecillin	S1[C@H]2N([C@@H](C(O)=O)C1(C)C)C(=O)[C@H]2NC(=O)[C@H](C(O)=O)c1ccccc1		NEGATIVE
Picrotoxin	O1[C@H]2[C@@H]3OC(=O)[C@]45O[C@H]4C[C@](O)([C@H]([C@H]2C(O)(C)C)C1=O)[C@]35C		NEGATIVE
Retinol	OC\C=C(\C=C\C=C(\C=C\C=1C(CCCC=1C)(C)C)/C)/C		NEGATIVE
(Iso)lappaol A	O1C[C@H](Cc2cc(OC)c3O[C@@H]([C@@H](c3c2)CO)c2cc(OC)c(O)cc2)[C@@H](Cc2cc(OC)c(O)cc2)C1=O	Barardo et al, The DrugAge database of aging-related drugs. Aging Cell. 2017 Jun;16(3):594-597. The DrugAge database of aging-related drugs.	POSITIVE
(R)-2-hydroxyglutarate	OC(=O)CC[C@@H](O)C(O)=O	Barardo et al, The DrugAge database of aging-related drugs. Aging Cell. 2017 Jun;16(3):594-597. The DrugAge database of aging-related drugs.	POSITIVE
10-hydroxy-2-decenoic Acid	OCCCCCCC\C=C\C(O)=O	Barardo et al, The DrugAge database of aging-related drugs. Aging Cell. 2017 Jun;16(3):594-597. The DrugAge database of aging-related drugs.	POSITIVE
1-methyl nicotinamide	O=C(N)c1ccc[n+](c1)C	Barardo et al, The DrugAge database of aging-related drugs. Aging Cell. 2017 Jun;16(3):594-597. The DrugAge database of aging-related drugs.	POSITIVE
3,4-dichloroisocoumarin	ClC=1c2c(cccc2)C(OC=1Cl)=O	Barardo et al, The DrugAge database of aging-related drugs. Aging Cell. 2017 Jun;16(3):594-597. The DrugAge database of aging-related drugs.	POSITIVE
4-dafachronic acid	O=C1CC[C@@]2([C@@H]3[C@H]([C@@H]4CC[C@H]([C@@H](CCC[C@H](C(O)=O)C)C)[C@]4(CC3)C)CCC2=C1)C	Barardo et al, The DrugAge database of aging-related drugs. Aging Cell. 2017 Jun;16(3):594-597. The DrugAge database of aging-related drugs.	POSITIVE
4-phenyl-3-furoxancarbonitrile	o1[n+]([O-])c(C#N)c(n1)-c1ccccc1	Barardo et al, The DrugAge database of aging-related drugs. Aging Cell. 2017 Jun;16(3):594-597. The DrugAge database of aging-related drugs.	POSITIVE
Acetaminophen	Oc1ccc(NC(=O)C)cc1	Barardo et al, The DrugAge database of aging-related drugs. Aging Cell. 2017 Jun;16(3):594-597. The DrugAge database of aging-related drugs.	POSITIVE
Acetic Acid	OC(=O)C	Barardo et al, The DrugAge database of aging-related drugs. Aging Cell. 2017 Jun;16(3):594-597. The DrugAge database of aging-related drugs.	POSITIVE
Allantoin	O=C1NC(=O)N[C@@H]1NC(=O)N	Barardo et al, The DrugAge database of aging-related drugs. Aging Cell. 2017 Jun;16(3):594-597. The DrugAge database of aging-related drugs.	POSITIVE
Alpha-ketoglutarate	OC(=O)C(=O)CCC(O)=O	Barardo et al, The DrugAge database of aging-related drugs. Aging Cell. 2017 Jun;16(3):594-597. The DrugAge database of aging-related drugs.	POSITIVE
Alpha-lipoic acid	S1SCC[C@H]1CCCCC(O)=O	Barardo et al, The DrugAge database of aging-related drugs. Aging Cell. 2017 Jun;16(3):594-597. The DrugAge database of aging-related drugs.	POSITIVE
AMN082	N(C(c1ccccc1)c1ccccc1)CCNC(c1ccccc1)c1ccccc1	Barardo et al, The DrugAge database of aging-related drugs. Aging Cell. 2017 Jun;16(3):594-597. The DrugAge database of aging-related drugs.	POSITIVE
Amoxapine	Clc1cc2c(Oc3c(N=C2N2CCNCC2)cccc3)cc1	Barardo et al, The DrugAge database of aging-related drugs. Aging Cell. 2017 Jun;16(3):594-597. The DrugAge database of aging-related drugs.	POSITIVE
Amperozide hydrochloride	Fc1ccc(cc1)C(CCCN1CCN(CC1)C(=O)NCC)c1ccc(F)cc1	Barardo et al, The DrugAge database of aging-related drugs. Aging Cell. 2017 Jun;16(3):594-597. The DrugAge database of aging-related drugs.	POSITIVE
Arctigenin	O1C[C@H](Cc2cc(OC)c(OC)cc2)[C@@H](Cc2cc(OC)c(O)cc2)C1=O	Barardo et al, The DrugAge database of aging-related drugs. Aging Cell. 2017 Jun;16(3):594-597. The DrugAge database of aging-related drugs.	POSITIVE
Arctiin	O1C[C@H](Cc2cc(OC)c(OC)cc2)[C@@H](Cc2cc(OC)c(O[C@@H]3O[C@H](CO)[C@@H](O)[C@H](O)[C@H]3O)cc2)C1=O	Barardo et al, The DrugAge database of aging-related drugs. Aging Cell. 2017 Jun;16(3):594-597. The DrugAge database of aging-related drugs.	POSITIVE
Ascorbic Acid	O1[C@H]([C@@H](O)CO)C(O)=C(O)C1=O	Barardo et al, The DrugAge database of aging-related drugs. Aging Cell. 2017 Jun;16(3):594-597. The DrugAge database of aging-related drugs.	POSITIVE
Ascr#2	O1[C@@H](C)[C@H](O)C[C@@H](O)[C@@H]1O[C@@H](CCC(=O)C)C	Barardo et al, The DrugAge database of aging-related drugs. Aging Cell. 2017 Jun;16(3):594-597. The DrugAge database of aging-related drugs.	POSITIVE
Ascr#3	O1[C@@H](C)[C@H](O)C[C@@H](O)[C@@H]1O[C@@H](CCCC\C=C\C(O)=O)C	Barardo et al, The DrugAge database of aging-related drugs. Aging Cell. 2017 Jun;16(3):594-597. The DrugAge database of aging-related drugs.	POSITIVE
Aspirin	O(C(=O)C)c1ccccc1C(O)=O	Barardo et al, The DrugAge database of aging-related drugs. Aging Cell. 2017 Jun;16(3):594-597. The DrugAge database of aging-related drugs.	POSITIVE
Astaxanthin	O=C1[C@@H](O)CC(C)(C)C(\C=C\C(=C\C=C\C(=C\C=C\C=C(\C=C\C=C(\C=C\C2=C(C)C(=O)[C@@H](O)CC2(C)C)/C)/C)\C)\C)=C1C	Barardo et al, The DrugAge database of aging-related drugs. Aging Cell. 2017 Jun;16(3):594-597. The DrugAge database of aging-related drugs.	POSITIVE
Bacitracin	S1C[C@H](N=C1[C@@H](N)[C@H](CC)C)C(=O)N[C@@H](CC(C)C)C(=O)N[C@H](CCC(O)=O)C(=O)N[C@@H]([C@H](CC)C)C(=O)N[C@H]1CCCCNC(=O)[C@@H](NC(=O)[C@H](NC(=O)[C@@H](NC(=O)[C@H](NC(=O)[C@@H](NC(=O)[C@H](NC1=O)CCCN)[C@H](CC)C)Cc1ccccc1)Cc1nc[nH]c1)CC(O)=O)CC(=O)N	Barardo et al, The DrugAge database of aging-related drugs. Aging Cell. 2017 Jun;16(3):594-597. The DrugAge database of aging-related drugs.	POSITIVE
Baicalein	O1c2c(c(O)c(O)c(O)c2)C(=O)C=C1c1ccccc1	Barardo et al, The DrugAge database of aging-related drugs. Aging Cell. 2017 Jun;16(3):594-597. The DrugAge database of aging-related drugs.	POSITIVE
Beta-caryophyllene	[C@@H]12[C@H](CC1(C)C)C(CC\C=C(\CC2)/C)=C	Barardo et al, The DrugAge database of aging-related drugs. Aging Cell. 2017 Jun;16(3):594-597. The DrugAge database of aging-related drugs.	POSITIVE
Beta-Estradiol	Oc1cc2CC[C@H]3[C@@H]4CC[C@H](O)[C@]4(CC[C@@H]3c2cc1)C	Barardo et al, The DrugAge database of aging-related drugs. Aging Cell. 2017 Jun;16(3):594-597. The DrugAge database of aging-related drugs.	POSITIVE
Bezafibrate	Clc1ccc(cc1)C(=O)NCCc1ccc(OC(C(O)=O)(C)C)cc1	Barardo et al, The DrugAge database of aging-related drugs. Aging Cell. 2017 Jun;16(3):594-597. The DrugAge database of aging-related drugs.	POSITIVE
BRL 15572	Clc1cc(N2CCN(CC2)C[C@@H](O)C(c2ccccc2)c2ccccc2)ccc1	Barardo et al, The DrugAge database of aging-related drugs. Aging Cell. 2017 Jun;16(3):594-597. The DrugAge database of aging-related drugs.	POSITIVE
BRL 50481	S(=O)(=O)(N(C)C)c1cc([N+](=O)[O-])ccc1C	Barardo et al, The DrugAge database of aging-related drugs. Aging Cell. 2017 Jun;16(3):594-597. The DrugAge database of aging-related drugs.	POSITIVE
BTCP hydrochloride	s1c2c(cc1C1(N3CCCCC3)CCCCC1)cccc2	Barardo et al, The DrugAge database of aging-related drugs. Aging Cell. 2017 Jun;16(3):594-597. The DrugAge database of aging-related drugs.	POSITIVE
Caffeic acid	Oc1cc(ccc1O)\C=C\C(O)=O	Barardo et al, The DrugAge database of aging-related drugs. Aging Cell. 2017 Jun;16(3):594-597. The DrugAge database of aging-related drugs.	POSITIVE
Caffeic acid phenethylester	Oc1cc(ccc1O)\C=C\C(OCCc1ccccc1)=O	Barardo et al, The DrugAge database of aging-related drugs. Aging Cell. 2017 Jun;16(3):594-597. The DrugAge database of aging-related drugs.	POSITIVE
Caffeine	O=C1N(C)C(=O)N(c2ncn(c12)C)C	Barardo et al, The DrugAge database of aging-related drugs. Aging Cell. 2017 Jun;16(3):594-597. The DrugAge database of aging-related drugs.	POSITIVE
Carbonylcyanide-3-chlorophenylhydrazone	Clc1cc(NN=C(C#N)C#N)ccc1	Barardo et al, The DrugAge database of aging-related drugs. Aging Cell. 2017 Jun;16(3):594-597. The DrugAge database of aging-related drugs.	POSITIVE
Celastrol	OC=1C(=O)C=C2C(=CC=C3[C@]4(CC[C@@]5([C@@H](C[C@@](CC5)(C(O)=O)C)[C@@]4(CC[C@@]23C)C)C)C)C=1C	Barardo et al, The DrugAge database of aging-related drugs. Aging Cell. 2017 Jun;16(3):594-597. The DrugAge database of aging-related drugs.	POSITIVE
Celecoxib	S(=O)(=O)(N)c1ccc(-n2nc(cc2-c2ccc(cc2)C)C(F)(F)F)cc1	Barardo et al, The DrugAge database of aging-related drugs. Aging Cell. 2017 Jun;16(3):594-597. The DrugAge database of aging-related drugs.	POSITIVE
Chicoric acid	Oc1cc(ccc1O)\C=C\C(O[C@@H]([C@H](OC(=O)\C=C\c1cc(O)c(O)cc1)C(O)=O)C(O)=O)=O	Barardo et al, The DrugAge database of aging-related drugs. Aging Cell. 2017 Jun;16(3):594-597. The DrugAge database of aging-related drugs.	POSITIVE
Chloramphenicol	ClC(Cl)C(=O)N[C@@H]([C@H](O)c1ccc([N+](=O)[O-])cc1)CO	Barardo et al, The DrugAge database of aging-related drugs. Aging Cell. 2017 Jun;16(3):594-597. The DrugAge database of aging-related drugs.	POSITIVE
Chlorprothixene hydrochloride	Clc1cc\2c(Sc3c(cccc3)/C/2=C/CCN(C)C)cc1	Barardo et al, The DrugAge database of aging-related drugs. Aging Cell. 2017 Jun;16(3):594-597. The DrugAge database of aging-related drugs.	POSITIVE
Ciclopirox olamine	O=C1N(O)C(=CC(=C1)C)C1CCCCC1	Barardo et al, The DrugAge database of aging-related drugs. Aging Cell. 2017 Jun;16(3):594-597. The DrugAge database of aging-related drugs.	POSITIVE
Cinnarizine	N1(CCN(CC1)C\C=C\c1ccccc1)C(c1ccccc1)c1ccccc1	Barardo et al, The DrugAge database of aging-related drugs. Aging Cell. 2017 Jun;16(3):594-597. The DrugAge database of aging-related drugs.	POSITIVE
Cis-(Z)-Flupenthixol dihydrochloride	S1c2c(cc(cc2)C(F)(F)F)\C(\c2c1cccc2)=C/CCN1CCN(CC1)CCO	Barardo et al, The DrugAge database of aging-related drugs. Aging Cell. 2017 Jun;16(3):594-597. The DrugAge database of aging-related drugs.	POSITIVE
Clofibrate	Clc1ccc(OC(C(OCC)=O)(C)C)cc1	Barardo et al, The DrugAge database of aging-related drugs. Aging Cell. 2017 Jun;16(3):594-597. The DrugAge database of aging-related drugs.	POSITIVE
Coenzyme Q10	O(C)C=1C(=O)C(C\C=C(\CC\C=C(\CC\C=C(\CC\C=C(\CC\C=C(\CC\C=C(\CC\C=C(\CC\C=C(\CC\C=C(\CCC=C(C)C)/C)/C)/C)/C)/C)/C)/C)/C)/C)=C(C)C(=O)C=1OC	Barardo et al, The DrugAge database of aging-related drugs. Aging Cell. 2017 Jun;16(3):594-597. The DrugAge database of aging-related drugs.	POSITIVE
Cortexolone maleate	S(=O)(=O)(NCCCCN1CCN(CC1)c1ccccc1OC)c1c2c(ccc1)c(N(C)C)ccc2	Barardo et al, The DrugAge database of aging-related drugs. Aging Cell. 2017 Jun;16(3):594-597. The DrugAge database of aging-related drugs.	POSITIVE
Curcumin	O(C)c1cc(ccc1O)\C=C\C(=O)CC(=O)\C=C\c1cc(OC)c(O)cc1	Barardo et al, The DrugAge database of aging-related drugs. Aging Cell. 2017 Jun;16(3):594-597. The DrugAge database of aging-related drugs.	POSITIVE
Cyclosporin A	O=C1N(C)[C@@H]([C@H](O)[C@@H](C\C=C\C)C)C(=O)N[C@@H](CC)C(=O)N(CC(=O)N(C)[C@@H](CC(C)C)C(=O)N[C@@H](C(C)C)C(=O)N(C)[C@@H](CC(C)C)C(=O)N[C@@H](C)C(=O)N[C@H](C)C(=O)N(C)[C@@H](CC(C)C)C(=O)N(C)[C@@H](CC(C)C)C(=O)N(C)[C@H]1C(C)C)C	Barardo et al, The DrugAge database of aging-related drugs. Aging Cell. 2017 Jun;16(3):594-597. The DrugAge database of aging-related drugs.	POSITIVE
Cyproterone acetate	ClC=1C2=CC(=O)[C@H]3[C@H](C3)[C@@]2([C@@H]2[C@H]([C@@H]3CC[C@](OC(=O)C)(C(=O)C)[C@]3(CC2)C)C=1)C	Barardo et al, The DrugAge database of aging-related drugs. Aging Cell. 2017 Jun;16(3):594-597. The DrugAge database of aging-related drugs.	POSITIVE
Dafadine-A	o1nc(cc1COc1c(cccc1C)C)C(=O)N1CCC(CC1)c1ccncc1	Barardo et al, The DrugAge database of aging-related drugs. Aging Cell. 2017 Jun;16(3):594-597. The DrugAge database of aging-related drugs.	POSITIVE
Danazol	o1ncc2C[C@@]3([C@@H]4[C@H]([C@@H]5CC[C@@](O)(C#C)[C@]5(CC4)C)CCC3=Cc12)C	Barardo et al, The DrugAge database of aging-related drugs. Aging Cell. 2017 Jun;16(3):594-597. The DrugAge database of aging-related drugs.	POSITIVE
DAPH	O=C1NC(=O)c2c1cc(Nc1ccccc1)c(Nc1ccccc1)c2	Barardo et al, The DrugAge database of aging-related drugs. Aging Cell. 2017 Jun;16(3):594-597. The DrugAge database of aging-related drugs.	POSITIVE
D-aspartate	OC(=O)C[C@@H](N)C(O)=O	Barardo et al, The DrugAge database of aging-related drugs. Aging Cell. 2017 Jun;16(3):594-597. The DrugAge database of aging-related drugs.	POSITIVE
D-beta-hydroxybutyrate	OC(=O)C[C@H](O)C	Barardo et al, The DrugAge database of aging-related drugs. Aging Cell. 2017 Jun;16(3):594-597. The DrugAge database of aging-related drugs.	POSITIVE
Dehydroabietic acid	OC(=O)[C@]1([C@@H]2CCc3cc(ccc3[C@]2(CCC1)C)C(C)C)C	Barardo et al, The DrugAge database of aging-related drugs. Aging Cell. 2017 Jun;16(3):594-597. The DrugAge database of aging-related drugs.	POSITIVE
Demeclocycline hydrochloride	Clc1c2c(C(O)=C3[C@H](C[C@@H]4[C@@](O)(C(O)=C(C(=O)N)C(=O)[C@H]4N(C)C)C3=O)[C@@H]2O)c(O)cc1	Barardo et al, The DrugAge database of aging-related drugs. Aging Cell. 2017 Jun;16(3):594-597. The DrugAge database of aging-related drugs.	POSITIVE
D-glucosamine	O1[C@H](CO)[C@@H](O)[C@H](O)[C@@H](N)[C@@H]1O	Barardo et al, The DrugAge database of aging-related drugs. Aging Cell. 2017 Jun;16(3):594-597. The DrugAge database of aging-related drugs.	POSITIVE
D-glutamate	OC(=O)CC[C@@H](N)C(O)=O	Barardo et al, The DrugAge database of aging-related drugs. Aging Cell. 2017 Jun;16(3):594-597. The DrugAge database of aging-related drugs.	POSITIVE
Diallyl trisulfide	S(SSCC=C)CC=C	Barardo et al, The DrugAge database of aging-related drugs. Aging Cell. 2017 Jun;16(3):594-597. The DrugAge database of aging-related drugs.	POSITIVE
Dibromoacetic acid	BrC(Br)C(O)=O	Barardo et al, The DrugAge database of aging-related drugs. Aging Cell. 2017 Jun;16(3):594-597. The DrugAge database of aging-related drugs.	POSITIVE
Dichloroacetate	ClC(Cl)C(O)=O	Barardo et al, The DrugAge database of aging-related drugs. Aging Cell. 2017 Jun;16(3):594-597. The DrugAge database of aging-related drugs.	POSITIVE
Dihydroergocristine methanesulfonate	O1[C@](NC(=O)[C@@H]2C[C@H]3[C@H](N(C2)C)Cc2c4c3cccc4[nH]c2)(C(C)C)C(=O)N2[C@@H](Cc3ccccc3)C(=O)N3[C@@H](CCC3)[C@]12O	Barardo et al, The DrugAge database of aging-related drugs. Aging Cell. 2017 Jun;16(3):594-597. The DrugAge database of aging-related drugs.	POSITIVE
Dihydroergotamine methanesulfonate	O1[C@](NC(=O)[C@@H]2C[C@H]3[C@H](N(C2)C)Cc2c4c3cccc4[nH]c2)(C)C(=O)N2[C@@H](Cc3ccccc3)C(=O)N3[C@@H](CCC3)[C@]12O	Barardo et al, The DrugAge database of aging-related drugs. Aging Cell. 2017 Jun;16(3):594-597. The DrugAge database of aging-related drugs.	POSITIVE
DL-isocitrate	OC(=O)C[C@H]([C@@H](O)C(O)=O)C(O)=O	Barardo et al, The DrugAge database of aging-related drugs. Aging Cell. 2017 Jun;16(3):594-597. The DrugAge database of aging-related drugs.	POSITIVE
Doxazosin mesylate	O1c2c(OC[C@H]1C(=O)N1CCN(CC1)c1nc(N)c3cc(OC)c(OC)cc3n1)cccc2	Barardo et al, The DrugAge database of aging-related drugs. Aging Cell. 2017 Jun;16(3):594-597. The DrugAge database of aging-related drugs.	POSITIVE
Doxycycline	OC=1[C@]2(O)[C@H]([C@H](N(C)C)C(=O)C=1C(=O)N)[C@@H](O)[C@H]1C(C2=O)=C(O)c2c(cccc2O)[C@@H]1C	Barardo et al, The DrugAge database of aging-related drugs. Aging Cell. 2017 Jun;16(3):594-597. The DrugAge database of aging-related drugs.	POSITIVE
Edetate Calcium Disodium	OC(=O)CN(CCN(CC(O)=O)CC(O)=O)CC(O)=O	Barardo et al, The DrugAge database of aging-related drugs. Aging Cell. 2017 Jun;16(3):594-597. The DrugAge database of aging-related drugs.	POSITIVE
Eliprodil	Clc1ccc(cc1)[C@H](O)CN1CCC(CC1)Cc1ccc(F)cc1	Barardo et al, The DrugAge database of aging-related drugs. Aging Cell. 2017 Jun;16(3):594-597. The DrugAge database of aging-related drugs.	POSITIVE
Epigallocatechin-3-gallate	O1c2c(C[C@@H](OC(=O)c3cc(O)c(O)c(O)c3)[C@H]1c1cc(O)c(O)c(O)c1)c(O)cc(O)c2	Barardo et al, The DrugAge database of aging-related drugs. Aging Cell. 2017 Jun;16(3):594-597. The DrugAge database of aging-related drugs.	POSITIVE
Ethanol	OCC	Barardo et al, The DrugAge database of aging-related drugs. Aging Cell. 2017 Jun;16(3):594-597. The DrugAge database of aging-related drugs.	POSITIVE
Ethidium bromide	[n+]1(c2cc(N)ccc2c2c(cc(N)cc2)c1-c1ccccc1)CC	Barardo et al, The DrugAge database of aging-related drugs. Aging Cell. 2017 Jun;16(3):594-597. The DrugAge database of aging-related drugs.	POSITIVE
Ethosuximide	O=C1NC(=O)CC1(CC)C	Barardo et al, The DrugAge database of aging-related drugs. Aging Cell. 2017 Jun;16(3):594-597. The DrugAge database of aging-related drugs.	POSITIVE
FCCP	FC(F)(F)Oc1ccc(NN=C(C#N)C#N)cc1	Barardo et al, The DrugAge database of aging-related drugs. Aging Cell. 2017 Jun;16(3):594-597. The DrugAge database of aging-related drugs.	POSITIVE
Fenofibrate	Clc1ccc(cc1)C(=O)c1ccc(OC(C(OC(C)C)=O)(C)C)cc1	Barardo et al, The DrugAge database of aging-related drugs. Aging Cell. 2017 Jun;16(3):594-597. The DrugAge database of aging-related drugs.	POSITIVE
Ferulsinaic acid	O1c2cc(OC[C@H]3[C@@](CCC(O)=O)(C)[C@@H](C[C@@H]3C)C=C(C)C)ccc2C=CC1=O	Barardo et al, The DrugAge database of aging-related drugs. Aging Cell. 2017 Jun;16(3):594-597. The DrugAge database of aging-related drugs.	POSITIVE
Folic acid	O=C1N=C(Nc2ncc(nc12)CNc1ccc(cc1)C(=O)N[C@@H](CCC(O)=O)C(O)=O)N	Barardo et al, The DrugAge database of aging-related drugs. Aging Cell. 2017 Jun;16(3):594-597. The DrugAge database of aging-related drugs.	POSITIVE
Fucoxanthin	O1[C@]2(CC(=O)\C(=C\C=C\C(=C\C=C\C=C(\C=C\C=C(\C=C=C3[C@](O)(C[C@@H](OC(=O)C)CC3(C)C)C)/C)/C)\C)\C)[C@]1(C[C@@H](O)CC2(C)C)C	Barardo et al, The DrugAge database of aging-related drugs. Aging Cell. 2017 Jun;16(3):594-597. The DrugAge database of aging-related drugs.	POSITIVE
Fumarate	OC(=O)\C=C\C(O)=O	Barardo et al, The DrugAge database of aging-related drugs. Aging Cell. 2017 Jun;16(3):594-597. The DrugAge database of aging-related drugs.	POSITIVE
Gallic Acid	Oc1c(O)cc(cc1O)C(O)=O	Barardo et al, The DrugAge database of aging-related drugs. Aging Cell. 2017 Jun;16(3):594-597. The DrugAge database of aging-related drugs.	POSITIVE
Geldanamycin	O(C)C1=C2C[C@H](C[C@H](OC)[C@H](O)[C@H](\C=C(/C)\[C@H](OC(=O)N)[C@@H](OC)/C=C\C=C(/C)\C(=O)NC(=CC1=O)C2=O)C)C	Barardo et al, The DrugAge database of aging-related drugs. Aging Cell. 2017 Jun;16(3):594-597. The DrugAge database of aging-related drugs.	POSITIVE
Genistein	O1C=C(C(=O)c2c1cc(O)cc2O)c1ccc(O)cc1	Barardo et al, The DrugAge database of aging-related drugs. Aging Cell. 2017 Jun;16(3):594-597. The DrugAge database of aging-related drugs.	POSITIVE
Glaucarubinone	O1[C@H]2[C@]34[C@@H]([C@@H](OC(=O)[C@@](O)(CC)C)C1=O)[C@@H](C)[C@@H](O)[C@@](OC3)(O)[C@@H]4[C@@]1([C@@H](C2)C(=CC(=O)[C@H]1O)C)C	Barardo et al, The DrugAge database of aging-related drugs. Aging Cell. 2017 Jun;16(3):594-597. The DrugAge database of aging-related drugs.	POSITIVE
Guanabenz acetate	Clc1cccc(Cl)c1\C=N\N=C(N)N	Barardo et al, The DrugAge database of aging-related drugs. Aging Cell. 2017 Jun;16(3):594-597. The DrugAge database of aging-related drugs.	POSITIVE
Guanfacine hydrochloride	Clc1cccc(Cl)c1CC(=O)N=C(N)N	Barardo et al, The DrugAge database of aging-related drugs. Aging Cell. 2017 Jun;16(3):594-597. The DrugAge database of aging-related drugs.	POSITIVE
GYY4137	SP(=S)(N1CCOCC1)c1ccc(OC)cc1	Barardo et al, The DrugAge database of aging-related drugs. Aging Cell. 2017 Jun;16(3):594-597. The DrugAge database of aging-related drugs.	POSITIVE
Histidine	OC(=O)[C@@H](N)Cc1[nH]cnc1	Barardo et al, The DrugAge database of aging-related drugs. Aging Cell. 2017 Jun;16(3):594-597. The DrugAge database of aging-related drugs.	POSITIVE
Huperzine A	O=C1NC2=C(C=C1)[C@@]/1(N)CC(=C[C@@H](C2)\C\1=C/C)C	Barardo et al, The DrugAge database of aging-related drugs. Aging Cell. 2017 Jun;16(3):594-597. The DrugAge database of aging-related drugs.	POSITIVE
Hydrogen Sulphide	S	Barardo et al, The DrugAge database of aging-related drugs. Aging Cell. 2017 Jun;16(3):594-597. The DrugAge database of aging-related drugs.	POSITIVE
Icariin	O1c2c(C(=O)C(O[C@@H]3O[C@@H](C)[C@H](O)[C@@H](O)[C@H]3O)=C1c1ccc(OC)cc1)c(O)cc(O[C@@H]1O[C@H](CO)[C@@H](O)[C@H](O)[C@H]1O)c2CC=C(C)C	Barardo et al, The DrugAge database of aging-related drugs. Aging Cell. 2017 Jun;16(3):594-597. The DrugAge database of aging-related drugs.	POSITIVE
Juglone	Oc1c2c(ccc1)C(=O)C=CC2=O	Barardo et al, The DrugAge database of aging-related drugs. Aging Cell. 2017 Jun;16(3):594-597. The DrugAge database of aging-related drugs.	POSITIVE
Kenpaullone	Brc1cc2c3CC(=O)Nc4c(-c3[nH]c2cc1)cccc4	Barardo et al, The DrugAge database of aging-related drugs. Aging Cell. 2017 Jun;16(3):594-597. The DrugAge database of aging-related drugs.	POSITIVE
Ketanserin tartrate	Fc1ccc(cc1)C(=O)C1CCN(CC1)CCN1C(=O)c2c(NC1=O)cccc2	Barardo et al, The DrugAge database of aging-related drugs. Aging Cell. 2017 Jun;16(3):594-597. The DrugAge database of aging-related drugs.	POSITIVE
Lappaol C	O1C[C@H](Cc2cc([C@@H]([C@@H](O)c3cc(OC)c(O)cc3)CO)c(O)c(OC)c2)[C@@H](Cc2cc(OC)c(O)cc2)C1=O	Barardo et al, The DrugAge database of aging-related drugs. Aging Cell. 2017 Jun;16(3):594-597. The DrugAge database of aging-related drugs.	POSITIVE
Lappaol F	O1C[C@H](Cc2cc(OC)c3O[C@@H]([C@H](c3c2)CO)c2cc(OC)c(O)cc2)[C@@H](Cc2cc(OC)c3O[C@@H]([C@H](c3c2)CO)c2cc(OC)c(O)cc2)C1=O	Barardo et al, The DrugAge database of aging-related drugs. Aging Cell. 2017 Jun;16(3):594-597. The DrugAge database of aging-related drugs.	POSITIVE
LFM-A13	Brc1ccc(Br)cc1NC(=O)\C(=C(/O)\C)\C#N	Barardo et al, The DrugAge database of aging-related drugs. Aging Cell. 2017 Jun;16(3):594-597. The DrugAge database of aging-related drugs.	POSITIVE
L-histidine methyl ester	O(C(=O)[C@@H](N)Cc1[nH]cnc1)C	Barardo et al, The DrugAge database of aging-related drugs. Aging Cell. 2017 Jun;16(3):594-597. The DrugAge database of aging-related drugs.	POSITIVE
Lonidamine	Clc1cc(Cl)ccc1Cn1nc(c2c1cccc2)C(O)=O	Barardo et al, The DrugAge database of aging-related drugs. Aging Cell. 2017 Jun;16(3):594-597. The DrugAge database of aging-related drugs.	POSITIVE
Loratadine	Clc1cc2c(cc1)C(c1ncccc1CC2)=C1CCN(CC1)C(OCC)=O	Barardo et al, The DrugAge database of aging-related drugs. Aging Cell. 2017 Jun;16(3):594-597. The DrugAge database of aging-related drugs.	POSITIVE
Loxapine succinate	Clc1cc2c(Oc3c(N=C2N2CCN(CC2)C)cccc3)cc1	Barardo et al, The DrugAge database of aging-related drugs. Aging Cell. 2017 Jun;16(3):594-597. The DrugAge database of aging-related drugs.	POSITIVE
L-Theanine	OC(=O)[C@@H](N)CCC(=O)NCC	Barardo et al, The DrugAge database of aging-related drugs. Aging Cell. 2017 Jun;16(3):594-597. The DrugAge database of aging-related drugs.	POSITIVE
LY-294002	O1c2c(cccc2-c2ccccc2)C(=O)C=C1N1CCOCC1	Barardo et al, The DrugAge database of aging-related drugs. Aging Cell. 2017 Jun;16(3):594-597. The DrugAge database of aging-related drugs.	POSITIVE
LY-367,265	S1(=O)(=O)N2CCCc3c2c(N1CCN1CCC(=CC1)c1c2c([nH]c1)cc(F)cc2)ccc3	Barardo et al, The DrugAge database of aging-related drugs. Aging Cell. 2017 Jun;16(3):594-597. The DrugAge database of aging-related drugs.	POSITIVE
Malate	OC(=O)C[C@@H](O)C(O)=O	Barardo et al, The DrugAge database of aging-related drugs. Aging Cell. 2017 Jun;16(3):594-597. The DrugAge database of aging-related drugs.	POSITIVE
Matairesinol	O1C[C@H](Cc2cc(OC)c(O)cc2)[C@@H](Cc2cc(OC)c(O)cc2)C1=O	Barardo et al, The DrugAge database of aging-related drugs. Aging Cell. 2017 Jun;16(3):594-597. The DrugAge database of aging-related drugs.	POSITIVE
Metergoline	O(Cc1ccccc1)C(=O)NC[C@@H]1C[C@H]2[C@H](N(C1)C)Cc1c3c2cccc3n(c1)C	Barardo et al, The DrugAge database of aging-related drugs. Aging Cell. 2017 Jun;16(3):594-597. The DrugAge database of aging-related drugs.	POSITIVE
Metformin	N(C(N=C(N)N)=N)(C)C	Barardo et al, The DrugAge database of aging-related drugs. Aging Cell. 2017 Jun;16(3):594-597. The DrugAge database of aging-related drugs.	POSITIVE
Methylergonovine maleate	OC[C@@H](NC(=O)[C@@H]1C=C2[C@H](N(C1)C)Cc1c3c2cccc3[nH]c1)CC	Barardo et al, The DrugAge database of aging-related drugs. Aging Cell. 2017 Jun;16(3):594-597. The DrugAge database of aging-related drugs.	POSITIVE
Mianserin	N12[C@@H](c3c(Cc4c1cccc4)cccc3)CN(CC2)C	Barardo et al, The DrugAge database of aging-related drugs. Aging Cell. 2017 Jun;16(3):594-597. The DrugAge database of aging-related drugs.	POSITIVE
Minocycline hydrochloride	OC=1[C@]2(O)[C@@H](C[C@H]3C(C2=O)=C(O)c2c(C3)c(N(C)C)ccc2O)[C@H](N(C)C)C(=O)C=1C(=O)N	Barardo et al, The DrugAge database of aging-related drugs. Aging Cell. 2017 Jun;16(3):594-597. The DrugAge database of aging-related drugs.	POSITIVE
MPTP	N1(CCC(=CC1)c1ccccc1)C	Barardo et al, The DrugAge database of aging-related drugs. Aging Cell. 2017 Jun;16(3):594-597. The DrugAge database of aging-related drugs.	POSITIVE
Myricetin	O1c2c(C(=O)C(O)=C1c1cc(O)c(O)c(O)c1)c(O)cc(O)c2	Barardo et al, The DrugAge database of aging-related drugs. Aging Cell. 2017 Jun;16(3):594-597. The DrugAge database of aging-related drugs.	POSITIVE
Myxothiazol	s1cc(nc1-c1nc(sc1)[C@@H](\C=C\C=C\C(C)C)C)\C=C\[C@H](OC)[C@H](/C(/OC)=C\C(=O)N)C	Barardo et al, The DrugAge database of aging-related drugs. Aging Cell. 2017 Jun;16(3):594-597. The DrugAge database of aging-related drugs.	POSITIVE
N-acetylglucosamine	O1[C@H](CO)[C@@H](O)[C@H](O)[C@@H](NC(=O)C)[C@@H]1O	Barardo et al, The DrugAge database of aging-related drugs. Aging Cell. 2017 Jun;16(3):594-597. The DrugAge database of aging-related drugs.	POSITIVE
N-acetyl-L-cysteine	SC[C@H](NC(=O)C)C(O)=O	Barardo et al, The DrugAge database of aging-related drugs. Aging Cell. 2017 Jun;16(3):594-597. The DrugAge database of aging-related drugs.	POSITIVE
Naftopidil dihydrochloride	O(C)c1ccccc1N1CCN(CC1)C[C@@H](O)COc1c2c(ccc1)cccc2	Barardo et al, The DrugAge database of aging-related drugs. Aging Cell. 2017 Jun;16(3):594-597. The DrugAge database of aging-related drugs.	POSITIVE
Naphthazarin	Oc1c2c(C(=O)C=CC2=O)c(O)cc1	Barardo et al, The DrugAge database of aging-related drugs. Aging Cell. 2017 Jun;16(3):594-597. The DrugAge database of aging-related drugs.	POSITIVE
N-butanol	OCCCC	Barardo et al, The DrugAge database of aging-related drugs. Aging Cell. 2017 Jun;16(3):594-597. The DrugAge database of aging-related drugs.	POSITIVE
Nicardipine hydrochloride	O(C(=O)C=1[C@@H](C(C(OC)=O)=C(NC=1C)C)c1cc([N+](=O)[O-])ccc1)CCN(Cc1ccccc1)C	Barardo et al, The DrugAge database of aging-related drugs. Aging Cell. 2017 Jun;16(3):594-597. The DrugAge database of aging-related drugs.	POSITIVE
Nicotinamide	O=C(N)c1cccnc1	Barardo et al, The DrugAge database of aging-related drugs. Aging Cell. 2017 Jun;16(3):594-597. The DrugAge database of aging-related drugs.	POSITIVE
Nicotinamide adenine dinucleotide	P(OC[C@H]1O[C@@H]([n+]2cc(ccc2)C(=O)N)[C@H](O)[C@@H]1O)(OP(OC[C@H]1O[C@@H](n2c3ncnc(N)c3nc2)[C@H](O)[C@@H]1O)(O)=O)(=O)[O-]	Barardo et al, The DrugAge database of aging-related drugs. Aging Cell. 2017 Jun;16(3):594-597. The DrugAge database of aging-related drugs.	POSITIVE
Nitrendipine	O(C(=O)C=1[C@H](C(C(OC)=O)=C(NC=1C)C)c1cc([N+](=O)[O-])ccc1)CC	Barardo et al, The DrugAge database of aging-related drugs. Aging Cell. 2017 Jun;16(3):594-597. The DrugAge database of aging-related drugs.	POSITIVE
N-nitrosodimethylamine	O=NN(C)C	Barardo et al, The DrugAge database of aging-related drugs. Aging Cell. 2017 Jun;16(3):594-597. The DrugAge database of aging-related drugs.	POSITIVE
Nortriptyline hydrochloride	N(CCC=C1c2c(CCc3c1cccc3)cccc2)C	Barardo et al, The DrugAge database of aging-related drugs. Aging Cell. 2017 Jun;16(3):594-597. The DrugAge database of aging-related drugs.	POSITIVE
N-propanol	OCCC	Barardo et al, The DrugAge database of aging-related drugs. Aging Cell. 2017 Jun;16(3):594-597. The DrugAge database of aging-related drugs.	POSITIVE
Oxaloacetate	OC(=O)C(=O)CC(O)=O	Barardo et al, The DrugAge database of aging-related drugs. Aging Cell. 2017 Jun;16(3):594-597. The DrugAge database of aging-related drugs.	POSITIVE
Oxatomide	O=C1Nc2c(N1CCCN1CCN(CC1)C(c1ccccc1)c1ccccc1)cccc2	Barardo et al, The DrugAge database of aging-related drugs. Aging Cell. 2017 Jun;16(3):594-597. The DrugAge database of aging-related drugs.	POSITIVE
Oxoline	O=C1C(=O)C(=O)c2c(cccc2)C1=O	Barardo et al, The DrugAge database of aging-related drugs. Aging Cell. 2017 Jun;16(3):594-597. The DrugAge database of aging-related drugs.	POSITIVE
Paraquat	[n+]1(ccc(cc1)-c1cc[n+](cc1)C)C	Barardo et al, The DrugAge database of aging-related drugs. Aging Cell. 2017 Jun;16(3):594-597. The DrugAge database of aging-related drugs.	POSITIVE
Pergolide methanesulfonate	S(C[C@@H]1C[C@H]2[C@H](N(C1)CCC)Cc1c3c2cccc3[nH]c1)C	Barardo et al, The DrugAge database of aging-related drugs. Aging Cell. 2017 Jun;16(3):594-597. The DrugAge database of aging-related drugs.	POSITIVE
Phenformin	N(=C(\N=C(N)N)/N)/CCc1ccccc1	Barardo et al, The DrugAge database of aging-related drugs. Aging Cell. 2017 Jun;16(3):594-597. The DrugAge database of aging-related drugs.	POSITIVE
Plumbagin	Oc1c2c(ccc1)C(=O)C(=CC2=O)C	Barardo et al, The DrugAge database of aging-related drugs. Aging Cell. 2017 Jun;16(3):594-597. The DrugAge database of aging-related drugs.	POSITIVE
Polydatin	O1[C@H](CO)[C@@H](O)[C@H](O)[C@@H](O)[C@@H]1Oc1cc(cc(O)c1)\C=C\c1ccc(O)cc1	Barardo et al, The DrugAge database of aging-related drugs. Aging Cell. 2017 Jun;16(3):594-597. The DrugAge database of aging-related drugs.	POSITIVE
Pregnenolone	O[C@@H]1CC2=CC[C@H]3[C@@H]4CC[C@H](C(=O)C)[C@]4(CC[C@@H]3[C@]2(CC1)C)C	Barardo et al, The DrugAge database of aging-related drugs. Aging Cell. 2017 Jun;16(3):594-597. The DrugAge database of aging-related drugs.	POSITIVE
Promethazine hydrochloride	S1c2c(N(c3c1cccc3)C[C@H](N(C)C)C)cccc2	Barardo et al, The DrugAge database of aging-related drugs. Aging Cell. 2017 Jun;16(3):594-597. The DrugAge database of aging-related drugs.	POSITIVE
Propionylpromazine hydrochloride	S1c2c(N(c3c1cccc3)CCCN(C)C)cc(cc2)C(=O)CC	Barardo et al, The DrugAge database of aging-related drugs. Aging Cell. 2017 Jun;16(3):594-597. The DrugAge database of aging-related drugs.	POSITIVE
Propyl gallate	Oc1c(O)cc(cc1O)C(OCCC)=O	Barardo et al, The DrugAge database of aging-related drugs. Aging Cell. 2017 Jun;16(3):594-597. The DrugAge database of aging-related drugs.	POSITIVE
Protocatechuic acid	Oc1cc(ccc1O)C(O)=O	Barardo et al, The DrugAge database of aging-related drugs. Aging Cell. 2017 Jun;16(3):594-597. The DrugAge database of aging-related drugs.	POSITIVE
Psora-4	O1c2c(C=CC1=O)c(OCCCCc1ccccc1)c1c(occ1)c2	Barardo et al, The DrugAge database of aging-related drugs. Aging Cell. 2017 Jun;16(3):594-597. The DrugAge database of aging-related drugs.	POSITIVE
Quercetin	O1c2c(C(=O)C(O)=C1c1cc(O)c(O)cc1)c(O)cc(O)c2	Barardo et al, The DrugAge database of aging-related drugs. Aging Cell. 2017 Jun;16(3):594-597. The DrugAge database of aging-related drugs.	POSITIVE
Quinidine sulfate	O(C)c1cc2c(nccc2[C@H](O)[C@@H]2N3C[C@@H]([C@@H](C2)CC3)C=C)cc1	Barardo et al, The DrugAge database of aging-related drugs. Aging Cell. 2017 Jun;16(3):594-597. The DrugAge database of aging-related drugs.	POSITIVE
Rapamycin	O1[C@@H](CC(=O)[C@@H](\C=C(/C)\[C@@H](O)[C@@H](OC)C(=O)[C@@H](C[C@@H](\C=C\C=C\C=C(/C)\[C@@H](OC)C[C@H]2O[C@](O)([C@@H](CC2)C)C(=O)C(=O)N2[C@@H](CCCC2)C1=O)C)C)C)[C@@H](C[C@H]1C[C@@H](OC)[C@H](O)CC1)C	Barardo et al, The DrugAge database of aging-related drugs. Aging Cell. 2017 Jun;16(3):594-597. The DrugAge database of aging-related drugs.	POSITIVE
Reserpine	O(C)c1c(OC)cc(cc1OC)C(O[C@@H]1C[C@H]2[C@H](C[C@H]3N(CCc4c5c([nH]c34)cc(OC)cc5)C2)[C@H](C(OC)=O)[C@H]1OC)=O	Barardo et al, The DrugAge database of aging-related drugs. Aging Cell. 2017 Jun;16(3):594-597. The DrugAge database of aging-related drugs.	POSITIVE
Resveratrol	Oc1cc(cc(O)c1)\C=C\c1ccc(O)cc1	Barardo et al, The DrugAge database of aging-related drugs. Aging Cell. 2017 Jun;16(3):594-597. The DrugAge database of aging-related drugs.	POSITIVE
Rifampicin	O1c2c3c4c(c(O)c2C)c(O)c(NC(=O)/C(=C\C=C\[C@H](C)[C@H](O)[C@@H](C)[C@@H](O)[C@@H](C)[C@H](OC(=O)C)[C@H](C)[C@@H](OC)\C=C\O[C@]1(C)C3=O)/C)c(\C=N\N1CCN(CC1)C)c4O	Barardo et al, The DrugAge database of aging-related drugs. Aging Cell. 2017 Jun;16(3):594-597. The DrugAge database of aging-related drugs.	POSITIVE
Rifamycin SV	O1c2c3c4c(c(O)c2C)c(O)c(NC(=O)/C(=C\C=C\[C@H](C)[C@H](O)[C@@H](C)[C@@H](O)[C@@H](C)[C@H](OC(=O)C)[C@H](C)[C@@H](OC)\C=C\O[C@]1(C)C3=O)/C)cc4O	Barardo et al, The DrugAge database of aging-related drugs. Aging Cell. 2017 Jun;16(3):594-597. The DrugAge database of aging-related drugs.	POSITIVE
Rosmarinic acid	Oc1cc(ccc1O)C[C@@H](OC(=O)\C=C\c1cc(O)c(O)cc1)C(O)=O	Barardo et al, The DrugAge database of aging-related drugs. Aging Cell. 2017 Jun;16(3):594-597. The DrugAge database of aging-related drugs.	POSITIVE
Rotenone	O1c2c(C[C@@H]1C(C)=C)c1O[C@H]3[C@H](c4cc(OC)c(OC)cc4OC3)C(=O)c1cc2	Barardo et al, The DrugAge database of aging-related drugs. Aging Cell. 2017 Jun;16(3):594-597. The DrugAge database of aging-related drugs.	POSITIVE
Salicylic acid	Oc1ccccc1C(O)=O	Barardo et al, The DrugAge database of aging-related drugs. Aging Cell. 2017 Jun;16(3):594-597. The DrugAge database of aging-related drugs.	POSITIVE
Serine	OC(=O)[C@@H](N)CO	Barardo et al, The DrugAge database of aging-related drugs. Aging Cell. 2017 Jun;16(3):594-597. The DrugAge database of aging-related drugs.	POSITIVE
Sesamin	O1C[C@H]2[C@H](CO[C@@H]2c2cc3OCOc3cc2)[C@H]1c1cc2OCOc2cc1	Barardo et al, The DrugAge database of aging-related drugs. Aging Cell. 2017 Jun;16(3):594-597. The DrugAge database of aging-related drugs.	POSITIVE
Specioside	O1[C@H](CO)[C@@H](O)[C@H](O)[C@@H](O)[C@@H]1O[C@@H]1OC=C[C@@H]2[C@H]1[C@]1(O[C@H]1[C@H]2OC(=O)\C=C\c1ccc(O)cc1)CO	Barardo et al, The DrugAge database of aging-related drugs. Aging Cell. 2017 Jun;16(3):594-597. The DrugAge database of aging-related drugs.	POSITIVE
Spermidine	N(CCCCN)CCCN	Barardo et al, The DrugAge database of aging-related drugs. Aging Cell. 2017 Jun;16(3):594-597. The DrugAge database of aging-related drugs.	POSITIVE
SU 4312	O=C/1Nc2c(cccc2)\C\1=C\c1ccc(N(C)C)cc1	Barardo et al, The DrugAge database of aging-related drugs. Aging Cell. 2017 Jun;16(3):594-597. The DrugAge database of aging-related drugs.	POSITIVE
Succinate	OC(=O)CCC(O)=O	Barardo et al, The DrugAge database of aging-related drugs. Aging Cell. 2017 Jun;16(3):594-597. The DrugAge database of aging-related drugs.	POSITIVE
Sulfamethoxazole	S(=O)(=O)(Nc1noc(c1)C)c1ccc(N)cc1	Barardo et al, The DrugAge database of aging-related drugs. Aging Cell. 2017 Jun;16(3):594-597. The DrugAge database of aging-related drugs.	POSITIVE
Tannic acid	O1[C@H](COC(=O)c2cc(OC(=O)c3cc(O)c(O)c(O)c3)c(O)c(O)c2)[C@@H](OC(=O)c2cc(OC(=O)c3cc(O)c(O)c(O)c3)c(O)c(O)c2)[C@H](OC(=O)c2cc(OC(=O)c3cc(O)c(O)c(O)c3)c(O)c(O)c2)[C@@H](OC(=O)c2cc(OC(=O)c3cc(O)c(O)c(O)c3)c(O)c(O)c2)[C@@H]1OC(=O)c1cc(OC(=O)c2cc(O)c(O)c(O)c2)c(O)c(O)c1	Barardo et al, The DrugAge database of aging-related drugs. Aging Cell. 2017 Jun;16(3):594-597. The DrugAge database of aging-related drugs.	POSITIVE
Taxifolin	O1c2c(C(=O)[C@H](O)[C@H]1c1cc(O)c(O)cc1)c(O)cc(O)c2	Barardo et al, The DrugAge database of aging-related drugs. Aging Cell. 2017 Jun;16(3):594-597. The DrugAge database of aging-related drugs.	POSITIVE
Thioflavin T	s1c2cc(ccc2[n+](C)c1-c1ccc(N(C)C)cc1)C	Barardo et al, The DrugAge database of aging-related drugs. Aging Cell. 2017 Jun;16(3):594-597. The DrugAge database of aging-related drugs.	POSITIVE
Thioridazine hydrochloride	S1c2c(N(c3c1cccc3)CC[C@@H]1N(CCCC1)C)cc(SC)cc2	Barardo et al, The DrugAge database of aging-related drugs. Aging Cell. 2017 Jun;16(3):594-597. The DrugAge database of aging-related drugs.	POSITIVE
Trehalose	O1[C@H](CO)[C@@H](O)[C@H](O)[C@@H](O)[C@H]1O[C@H]1O[C@H](CO)[C@@H](O)[C@H](O)[C@H]1O	Barardo et al, The DrugAge database of aging-related drugs. Aging Cell. 2017 Jun;16(3):594-597. The DrugAge database of aging-related drugs.	POSITIVE
Trequinsin hydrochloride	O(C)c1cc2CCN3C(=C/C(=N\c4c(cc(cc4C)C)C)/N(C)C3=O)c2cc1OC	Barardo et al, The DrugAge database of aging-related drugs. Aging Cell. 2017 Jun;16(3):594-597. The DrugAge database of aging-related drugs.	POSITIVE
Trichostatin A	O=C([C@@H](\C=C(\C=C\C(=O)NO)/C)C)c1ccc(N(C)C)cc1	Barardo et al, The DrugAge database of aging-related drugs. Aging Cell. 2017 Jun;16(3):594-597. The DrugAge database of aging-related drugs.	POSITIVE
Trimethadione	O1C(C)(C)C(=O)N(C)C1=O	Barardo et al, The DrugAge database of aging-related drugs. Aging Cell. 2017 Jun;16(3):594-597. The DrugAge database of aging-related drugs.	POSITIVE
Trolox	O1c2c(CCC1(C(O)=O)C)c(C)c(O)c(C)c2C	Barardo et al, The DrugAge database of aging-related drugs. Aging Cell. 2017 Jun;16(3):594-597. The DrugAge database of aging-related drugs.	POSITIVE
Tryptophan	OC(=O)[C@@H](N)Cc1c2c([nH]c1)cccc2	Barardo et al, The DrugAge database of aging-related drugs. Aging Cell. 2017 Jun;16(3):594-597. The DrugAge database of aging-related drugs.	POSITIVE
Tyrosol	Oc1ccc(cc1)CCO	Barardo et al, The DrugAge database of aging-related drugs. Aging Cell. 2017 Jun;16(3):594-597. The DrugAge database of aging-related drugs.	POSITIVE
Tyrphostin AG 1478	Clc1cc(Nc2ncnc3c2cc(OC)c(OC)c3)ccc1	Barardo et al, The DrugAge database of aging-related drugs. Aging Cell. 2017 Jun;16(3):594-597. The DrugAge database of aging-related drugs.	POSITIVE
Valproic acid	OC(=O)C(CCC)CCC	Barardo et al, The DrugAge database of aging-related drugs. Aging Cell. 2017 Jun;16(3):594-597. The DrugAge database of aging-related drugs.	POSITIVE
Verminoside	O1[C@H](CO)[C@@H](O)[C@H](O)[C@@H](O)[C@@H]1O[C@H]1OC=C[C@@H]2[C@@H]1[C@@]1(O[C@@H]1[C@@H]2OC(=O)\C=C\c1cc(O)c(O)cc1)CO	Barardo et al, The DrugAge database of aging-related drugs. Aging Cell. 2017 Jun;16(3):594-597. The DrugAge database of aging-related drugs.	POSITIVE
Vincristine sulfate	O(C)c1cc2N([C@@H]3[C@@]4([C@H]5N(CC=C[C@@]5(CC)[C@@H](OC(=O)C)[C@]3(O)C(OC)=O)CC4)c2cc1[C@@]1(c2[nH]c3c(c2CCN2C[C@@](O)(C[C@H](C1)C2)CC)cccc3)C(OC)=O)C=O	Barardo et al, The DrugAge database of aging-related drugs. Aging Cell. 2017 Jun;16(3):594-597. The DrugAge database of aging-related drugs.	POSITIVE
Vinpocetine	O(C(=O)C=1n2c3c(c4CCN5[C@H](c24)[C@](C=1)(CCC5)CC)cccc3)CC	Barardo et al, The DrugAge database of aging-related drugs. Aging Cell. 2017 Jun;16(3):594-597. The DrugAge database of aging-related drugs.	POSITIVE
Vitamin D3	O[C@@H]1C\C(=C\C=C/2\[C@@H]3CC[C@H]([C@@H](CCCC(C)C)C)[C@]3(CCC\2)C)\C(CC1)=C	Barardo et al, The DrugAge database of aging-related drugs. Aging Cell. 2017 Jun;16(3):594-597. The DrugAge database of aging-related drugs.	POSITIVE
Vitamin E	O1c2c(CC[C@]1(CCC[C@@H](CCC[C@@H](CCCC(C)C)C)C)C)c(C)c(O)c(C)c2C	Barardo et al, The DrugAge database of aging-related drugs. Aging Cell. 2017 Jun;16(3):594-597. The DrugAge database of aging-related drugs.	POSITIVE
Vitexin	O1c2c(C(=O)C=C1c1ccc(O)cc1)c(O)cc(O)c2[C@@H]1O[C@H](CO)[C@@H](O)[C@H](O)[C@H]1O	Barardo et al, The DrugAge database of aging-related drugs. Aging Cell. 2017 Jun;16(3):594-597. The DrugAge database of aging-related drugs.	POSITIVE
3,3-diethyl-2-pyrrolidinone	O=C1NCCC1(CC)CC	Barardo et al, The DrugAge database of aging-related drugs. Aging Cell. 2017 Jun;16(3):594-597. The DrugAge database of aging-related drugs.	POSITIVE
Proline	OC(=O)[C@H]1NCCC1	Barardo et al, The DrugAge database of aging-related drugs. Aging Cell. 2017 Jun;16(3):594-597. The DrugAge database of aging-related drugs.	POSITIVE
Q3'G	O1c2c(C(=O)C(O)=C1c1cc(O[C@@H]3O[C@H](CO)[C@H](O)[C@H](O)[C@@H]3O)c(O)cc1)c(O)cc(O)c2	Barardo et al, The DrugAge database of aging-related drugs. Aging Cell. 2017 Jun;16(3):594-597. The DrugAge database of aging-related drugs.	POSITIVE
Q3M	O1c2c(C(=O)C(O[C@@H]3O[C@H](CO)[C@H](O[C@@H]4O[C@H](CO)[C@H](O)[C@H](O)[C@@H]4O)[C@H](O)[C@@H]3O)=C1C=1C=C[C@@H](O)[C@@H](O)C=1)c(O)cc(O)c2	Barardo et al, The DrugAge database of aging-related drugs. Aging Cell. 2017 Jun;16(3):594-597. The DrugAge database of aging-related drugs.	POSITIVE
(R,R)-cis-Diethyl tetrahydro-2,8-chrysenediol	Oc1cc2C[C@H](C3=C(c2cc1)[C@H](Cc1cc(O)ccc13)CC)CC	Barardo et al, The DrugAge database of aging-related drugs. Aging Cell. 2017 Jun;16(3):594-597. The DrugAge database of aging-related drugs.	POSITIVE
7-cyclopentyl-5-(4-phenoxy)phenyl-7H-pyrrolo[2,3-d]pyrimidin-4-ylamine	O(c1ccc(cc1)-c1c2c(ncnc2N)n(c1)C1CCCC1)c1ccccc1	Barardo et al, The DrugAge database of aging-related drugs. Aging Cell. 2017 Jun;16(3):594-597. The DrugAge database of aging-related drugs.	POSITIVE
Acacetin 7-O-alpha-l-rhamnopyranosyl (1–2) beta-D-xylopyranoside	O1c2c(C(=O)C=C1c1ccc(OC)cc1)c(O)cc(O[C@@H]1OC[C@H](O)[C@H](O)[C@@H]1O[C@@H]1O[C@H](C)[C@H](O)[C@H](O)[C@@H]1O)c2	Barardo et al, The DrugAge database of aging-related drugs. Aging Cell. 2017 Jun;16(3):594-597. The DrugAge database of aging-related drugs.	POSITIVE
Agmatine	N(CCCCN)C(N)=N	Barardo et al, The DrugAge database of aging-related drugs. Aging Cell. 2017 Jun;16(3):594-597. The DrugAge database of aging-related drugs.	POSITIVE
Alanine	OC(=O)[C@H](N)C	Barardo et al, The DrugAge database of aging-related drugs. Aging Cell. 2017 Jun;16(3):594-597. The DrugAge database of aging-related drugs.	POSITIVE
Ampicillin	S1[C@H]2N([C@@H](C(O)=O)C1(C)C)C(=O)[C@H]2\N=C(\O)/[C@H](N)c1ccccc1	Barardo et al, The DrugAge database of aging-related drugs. Aging Cell. 2017 Jun;16(3):594-597. The DrugAge database of aging-related drugs.	POSITIVE
Arginine	OC(=O)[C@@H](N)CCCNC(N)=N	Barardo et al, The DrugAge database of aging-related drugs. Aging Cell. 2017 Jun;16(3):594-597. The DrugAge database of aging-related drugs.	POSITIVE
Asparagine	OC(=N)C[C@H](N)C(O)=O	Barardo et al, The DrugAge database of aging-related drugs. Aging Cell. 2017 Jun;16(3):594-597. The DrugAge database of aging-related drugs.	POSITIVE
Beta-alanine	OC(=O)CCN	Barardo et al, The DrugAge database of aging-related drugs. Aging Cell. 2017 Jun;16(3):594-597. The DrugAge database of aging-related drugs.	POSITIVE
Betaine	O=C([O-])C[N+](C)(C)C	Barardo et al, The DrugAge database of aging-related drugs. Aging Cell. 2017 Jun;16(3):594-597. The DrugAge database of aging-related drugs.	POSITIVE
Caprylate	OC(=O)CCCCCCC	Barardo et al, The DrugAge database of aging-related drugs. Aging Cell. 2017 Jun;16(3):594-597. The DrugAge database of aging-related drugs.	POSITIVE
Carnosine	OC(=O)[C@@H](\N=C(\O)/CCN)Cc1[nH]cnc1	Barardo et al, The DrugAge database of aging-related drugs. Aging Cell. 2017 Jun;16(3):594-597. The DrugAge database of aging-related drugs.	POSITIVE
Citrate	OC(CC(O)=O)(CC(O)=O)C(O)=O	Barardo et al, The DrugAge database of aging-related drugs. Aging Cell. 2017 Jun;16(3):594-597. The DrugAge database of aging-related drugs.	POSITIVE
Creatine	OC(=O)CN(C(N)=N)C	Barardo et al, The DrugAge database of aging-related drugs. Aging Cell. 2017 Jun;16(3):594-597. The DrugAge database of aging-related drugs.	POSITIVE
Cysteine	SC[C@@H](N)C(O)=O	Barardo et al, The DrugAge database of aging-related drugs. Aging Cell. 2017 Jun;16(3):594-597. The DrugAge database of aging-related drugs.	POSITIVE
Dimethyl formamide	O=CN(C)C	Barardo et al, The DrugAge database of aging-related drugs. Aging Cell. 2017 Jun;16(3):594-597. The DrugAge database of aging-related drugs.	POSITIVE
Dimethyl sulfoxide	S(=O)(C)C	Barardo et al, The DrugAge database of aging-related drugs. Aging Cell. 2017 Jun;16(3):594-597. The DrugAge database of aging-related drugs.	POSITIVE
DL-lactate	OC(=O)[C@H](O)C	Barardo et al, The DrugAge database of aging-related drugs. Aging Cell. 2017 Jun;16(3):594-597. The DrugAge database of aging-related drugs.	POSITIVE
Gamma-tocopherol	O1c2c(cc(O)c(C)c2C)CC[C@]1(CCC[C@@H](CCC[C@@H](CCCC(C)C)C)C)C	Barardo et al, The DrugAge database of aging-related drugs. Aging Cell. 2017 Jun;16(3):594-597. The DrugAge database of aging-related drugs.	POSITIVE
Gluconate	OC(=O)[C@H](O)[C@@H](O)[C@H](O)[C@H](O)CO	Barardo et al, The DrugAge database of aging-related drugs. Aging Cell. 2017 Jun;16(3):594-597. The DrugAge database of aging-related drugs.	POSITIVE
Glutamine	OC(=N)CC[C@H](N)C(O)=O	Barardo et al, The DrugAge database of aging-related drugs. Aging Cell. 2017 Jun;16(3):594-597. The DrugAge database of aging-related drugs.	POSITIVE
Glutathione	SC[C@H](\N=C(/O)\CC[C@H](N)C(O)=O)/C(/O)=N/CC(O)=O	Barardo et al, The DrugAge database of aging-related drugs. Aging Cell. 2017 Jun;16(3):594-597. The DrugAge database of aging-related drugs.	POSITIVE
Glycerol	OC(CO)CO	Barardo et al, The DrugAge database of aging-related drugs. Aging Cell. 2017 Jun;16(3):594-597. The DrugAge database of aging-related drugs.	POSITIVE
Glycine	OC(=O)CN	Barardo et al, The DrugAge database of aging-related drugs. Aging Cell. 2017 Jun;16(3):594-597. The DrugAge database of aging-related drugs.	POSITIVE
Hexahydro-sila-diphenidol	[Si](O)(CCCN1CCCCC1)(C1CCCCC1)c1ccc(F)cc1	Barardo et al, The DrugAge database of aging-related drugs. Aging Cell. 2017 Jun;16(3):594-597. The DrugAge database of aging-related drugs.	POSITIVE
Homocysteine	SCC[C@@H](N)C(O)=O	Barardo et al, The DrugAge database of aging-related drugs. Aging Cell. 2017 Jun;16(3):594-597. The DrugAge database of aging-related drugs.	POSITIVE
Inositol	OC1C(O)C(O)C(O)C(O)C1O	Barardo et al, The DrugAge database of aging-related drugs. Aging Cell. 2017 Jun;16(3):594-597. The DrugAge database of aging-related drugs.	POSITIVE
Isoleucine	OC(=O)[C@@H](N)[C@H](CC)C	Barardo et al, The DrugAge database of aging-related drugs. Aging Cell. 2017 Jun;16(3):594-597. The DrugAge database of aging-related drugs.	POSITIVE
Leucine	OC(=O)[C@H](N)CC(C)C	Barardo et al, The DrugAge database of aging-related drugs. Aging Cell. 2017 Jun;16(3):594-597. The DrugAge database of aging-related drugs.	POSITIVE
LY-165,163	FC(F)(F)c1cc(N2CCN(CC2)CCc2ccc(N)cc2)ccc1	Barardo et al, The DrugAge database of aging-related drugs. Aging Cell. 2017 Jun;16(3):594-597. The DrugAge database of aging-related drugs.	POSITIVE
Lysine	OC(=O)[C@@H](N)CCCCN	Barardo et al, The DrugAge database of aging-related drugs. Aging Cell. 2017 Jun;16(3):594-597. The DrugAge database of aging-related drugs.	POSITIVE
N-(2-[4-(4-chlorophenyl)piperazin-1-yl]ethyl)-3-methoxybenzamide	Clc1ccc(N2CCN(CC2)CCNC(=O)c2cc(OC)ccc2)cc1	Barardo et al, The DrugAge database of aging-related drugs. Aging Cell. 2017 Jun;16(3):594-597. The DrugAge database of aging-related drugs.	POSITIVE
Octoclothepin maleate	Clc1cc2c(Sc3c(C[C@H]2N2CCN(CC2)C)cccc3)cc1	Barardo et al, The DrugAge database of aging-related drugs. Aging Cell. 2017 Jun;16(3):594-597. The DrugAge database of aging-related drugs.	POSITIVE
Ornithine	OC(=O)[C@H](N)CCCN	Barardo et al, The DrugAge database of aging-related drugs. Aging Cell. 2017 Jun;16(3):594-597. The DrugAge database of aging-related drugs.	POSITIVE
Phosphoenolpyruvate	P(OC(C(O)=O)=C)(O)(O)=O	Barardo et al, The DrugAge database of aging-related drugs. Aging Cell. 2017 Jun;16(3):594-597. The DrugAge database of aging-related drugs.	POSITIVE
Picolinic acid	OC(=O)c1ncccc1	Barardo et al, The DrugAge database of aging-related drugs. Aging Cell. 2017 Jun;16(3):594-597. The DrugAge database of aging-related drugs.	POSITIVE
Piericidin A	O(C)C=1C(=O)C(C)=C(NC=1OC)C\C=C(\C\C=C\C(=C\[C@H]([C@@H](O)\C(=C\C)\C)C)\C)/C	Barardo et al, The DrugAge database of aging-related drugs. Aging Cell. 2017 Jun;16(3):594-597. The DrugAge database of aging-related drugs.	POSITIVE
Putrescine	NCCCCN	Barardo et al, The DrugAge database of aging-related drugs. Aging Cell. 2017 Jun;16(3):594-597. The DrugAge database of aging-related drugs.	POSITIVE
Sodium pyruvate	OC(=O)C(=O)C	Barardo et al, The DrugAge database of aging-related drugs. Aging Cell. 2017 Jun;16(3):594-597. The DrugAge database of aging-related drugs.	POSITIVE
Sorbitol	OC[C@@H](O)[C@@H](O)[C@@H](O)[C@@H](O)CO	Barardo et al, The DrugAge database of aging-related drugs. Aging Cell. 2017 Jun;16(3):594-597. The DrugAge database of aging-related drugs.	POSITIVE
Tamarixetin	O1c2c(C(=O)C(O)=C1c1cc(O)c(OC)cc1)c(O)cc(O)c2	Barardo et al, The DrugAge database of aging-related drugs. Aging Cell. 2017 Jun;16(3):594-597. The DrugAge database of aging-related drugs.	POSITIVE
Taurine	S(O)(=O)(=O)CCN	Barardo et al, The DrugAge database of aging-related drugs. Aging Cell. 2017 Jun;16(3):594-597. The DrugAge database of aging-related drugs.	POSITIVE
Threonine	OC(=O)[C@H](N)[C@H](O)C	Barardo et al, The DrugAge database of aging-related drugs. Aging Cell. 2017 Jun;16(3):594-597. The DrugAge database of aging-related drugs.	POSITIVE
Tyrosine	Oc1ccc(cc1)C[C@@H](N)C(O)=O	Barardo et al, The DrugAge database of aging-related drugs. Aging Cell. 2017 Jun;16(3):594-597. The DrugAge database of aging-related drugs.	POSITIVE
Valine	OC(=O)[C@H](N)C(C)C	Barardo et al, The DrugAge database of aging-related drugs. Aging Cell. 2017 Jun;16(3):594-597. The DrugAge database of aging-related drugs.	POSITIVE
Catechin	O1c2c(C[C@H](O)[C@H]1c1cc(O)c(O)cc1)c(O)cc(O)c2	Barardo et al, The DrugAge database of aging-related drugs. Aging Cell. 2017 Jun;16(3):594-597. The DrugAge database of aging-related drugs.	POSITIVE
Glucose	C([C@@H]1[C@H]([C@@H]([C@H](C(O1)O)O)O)O)O	Barardo et al, The DrugAge database of aging-related drugs. Aging Cell. 2017 Jun;16(3):594-597. The DrugAge database of aging-related drugs.	POSITIVE
Ribose	C([C@@H]1[C@H]([C@H](C(O1)O)O)O)O	Barardo et al, The DrugAge database of aging-related drugs. Aging Cell. 2017 Jun;16(3):594-597. The DrugAge database of aging-related drugs.	POSITIVE
Xylose	C1[C@H]([C@@H]([C@H]([C@H](O1)O)O)O)O	Barardo et al, The DrugAge database of aging-related drugs. Aging Cell. 2017 Jun;16(3):594-597. The DrugAge database of aging-related drugs.	POSITIVE
Galactose	C([C@@H]1[C@@H]([C@@H]([C@H]([C@H](O1)O)O)O)O)O	Barardo et al, The DrugAge database of aging-related drugs. Aging Cell. 2017 Jun;16(3):594-597. The DrugAge database of aging-related drugs.	POSITIVE
(S)-2-hydroxyglutarate	OC(=O)CC[C@H](O)C(O)=O	Barardo et al, The DrugAge database of aging-related drugs. Aging Cell. 2017 Jun;16(3):594-597. The DrugAge database of aging-related drugs.	POSITIVE
Epicatechin	O1c2c(C[C@@H](O)[C@H]1c1cc(O)c(O)cc1)c(O)cc(O)c2	Barardo et al, The DrugAge database of aging-related drugs. Aging Cell. 2017 Jun;16(3):594-597. The DrugAge database of aging-related drugs.	POSITIVE

## Sheet: Table S2
Table S2: GO terms and chemical descriptors highlighting those selected via feature selection from the best random forest model
The table below shows the most important features calculated by median variable importance from the best Random Forest model built using both GO terms and chemical descriptors
Feature Name	Median Variable Importance	Important Feature?		Feature Key
a_nN	14.4032	Yes		Chemical Descriptor
isomerase activity	12.76	Yes		Gene Ontology term
macromitophagy	11.83	Yes
macroautophagy	11.6683	Yes
protein disulfide isomerase activity	11.1097	Yes
dipeptidase activity	10.9616	Yes
pyruvate metabolic process	9.71888	Yes
PEOE_VSA+4	9.47192	Yes
fatty acid transport	9.30984	Yes
mitochondrial electron transport, NADH to ubiquinone	8.78886	Yes
vsurf_Wp2	8.64396	Yes
isotype switching	8.56726	Yes
translation	8.40673	Yes
Q_RPC-	8.18026	Yes
aerobic respiration	8.09294	Yes
a_IC	7.98267	Yes
PEOE_VSA_FPPOS	7.94796	Yes
triglyceride mobilization	7.85994	Yes
chi1v	7.79116	Yes
bpol	7.70013	Yes
PEOE_RPC+	7.58375	Yes
PEOE_PC-	7.57945	Yes
Q_VSA_HYD	7.5089	Yes
vsurf_D6	7.43252	Yes
weinerPol	7.33662	Yes
vsurf_R	7.30941	Yes
vsurf_D7	7.18101	Yes
CASA-	7.16356	Yes
zagreb	7.15583	Yes
SMR	7.14268	Yes
vsurf_Wp1	7.12201	Yes
very-low-density lipoprotein particle assembly	6.87829	Yes
mr	6.86295	Yes
vsurf_D2	6.82045	Yes
chi0v_C	6.81391	Yes
PEOE_VSA_PPOS	6.78523	Yes
labyrinthine layer development	6.76854	Yes
ASA_H	6.76325	Yes
gastrulation	6.68283	Yes
cellular metabolic process	6.6471	Yes
vsurf_D1	6.62906	Yes
vsurf_D3	6.55978	Yes
Q_PC+	6.55783	Yes
AM1_Eele	6.5456	Yes
apol	6.54428	Yes
glyoxylate metabolic process	6.5103	Yes
chi0_C	6.45057	Yes
PEOE_VSA-6	6.41438	Yes
vsurf_D5	6.39722	Yes
lipase binding	6.3725	Yes
chi0v	6.32655	Yes
Weight	6.30563	Yes
VDistMa	6.29607	Yes
AM1_E	6.2689	Yes
PEOE_VSA_FPOL	6.2688	Yes
ASA	6.2232	Yes
PEOE_VSA_HYD	6.21156	Yes
FIBpH7.4	6.20905	Yes
vsurf_D4	6.19543	Yes
vsurf_D8	6.18406	Yes
a_nO	6.18159	Yes
PEOE_VSA_FHYD	6.17818	Yes
PEOE_VSA_FPNEG	6.17081	Yes
VSA	6.15284	Yes
vsurf_V	6.14186	Yes
vdw_vol	6.10028	Yes
serine-type endopeptidase activity	6.05725	Yes
chi0	6.04857	Yes
PEOE_VSA_NEG	5.98476	Yes
chi1	5.98402	Yes
pmi	5.97781	Yes
a_ICM	5.94645	Yes
SMR_VSA7	5.92012	Yes
b_count	5.88974	Yes
Kier1	5.87923	Yes
Q_VSA_NEG	5.80121	Yes
vol	5.80018	Yes
b_single	5.68299	Yes
mitochondrial proton-transporting ATP synthase complex	5.6515	Yes
a_count	5.60412	Yes
PEOE_VSA_POL	5.6004	Yes
vsurf_CW1	5.53873	Yes
chiral	5.15391	Yes
b_heavy	5.15231	Yes
SlogP_VSA0	5.1309	Yes
SMR_VSA3	5.0982	Yes
vsurf_EDmin1	4.79204	Yes
vsurf_ID8	4.56911	Yes
Q_VSA_FPPOS	4.53805	Yes
AM1_HF	4.40412	Yes
a_heavy	4.30452	Yes
SMR_VSA1	4.11747	Yes
vsurf_EDmin3	4.10427	Yes
4 iron, 4 sulfur cluster binding	3.99882	No
vsurf_CW4	3.92372	No
vsurf_HL1	3.70112	No
protein disulfide oxidoreductase activity	2.92637	No
weinerPath	2.85042	No
mature chylomicron	2.82142	No
vdw_area	2.75641	No
VAdjMa	2.72987	No
alkaline phosphatase activity	2.72582	No
peroxisomal membrane	2.7253	No
chylomicron remnant	2.71832	No
vsurf_S	2.66772	No
vsurf_W1	2.59064	No
positive regulation of lipid storage	2.57866	No
vsurf_CW2	2.56238	No
VAdjEq	2.55429	No
SlogP	2.54205	No
Notch signaling pathway	2.54093	No
ATP synthesis coupled proton transport	2.539	No
T cell proliferation	2.53881	No
chi1_C	2.53507	No
FASA_H	2.52292	No
ribonuclease A activity	2.51794	No
Q_VSA_POS	2.50952	No
small ribosomal subunit	2.48974	No
viral life cycle	2.47296	No
aminoacylase activity	2.45927	No
PEOE_PC+	2.45116	No
vsurf_EDmin2	2.4485	No
ASA+	2.42983	No
regulation of cholesterol biosynthetic process	2.4261	No
negative regulation of leukocyte cell-cell adhesion	2.41894	No
ureteric bud development	2.41634	No
oxidoreductase activity, acting on peroxide as acceptor	2.40571	No
positive regulation of cellular metabolic process	2.4031	No
Kier2	2.37372	No
b_double	2.36479	No
Q_PC-	2.35889	No
viral protein processing	2.34216	No
gamma-glutamylcyclotransferase activity	2.33718	No
bHLH transcription factor binding	2.31961	No
positive regulation of innate immune response	2.3149	No
AMP-activated protein kinase activity	2.30954	No
KierA1	2.30765	No
positive regulation of proteasomal protein catabolic process	2.27842	No
CASA+	2.27388	No
endocytic vesicle lumen	2.2675	No
pyrophosphatase activity	2.25321	No
aspartate metabolic process	2.25258	No
oxidative phosphorylation	2.24324	No
translational initiation	2.23829	No
regulation of G1/S transition of mitotic cell cycle	2.22568	No
structural constituent of ribosome	2.22187	No
RNA-dependent DNA replication	2.20868	No
negative regulation of oxidative stress-induced neuron intrinsic apoptotic signaling pathway	2.19413	No
antigen binding	2.18814	No
VDistEq	2.18713	No
chi1v_C	2.18291	No
SRP-dependent cotranslational protein targeting to membrane	2.17735	No
disulfide oxidoreductase activity	2.16768	No
LogD(7.4)	2.16286	No
endosome lumen	2.15937	No
logP(o/w)	2.14656	No
cellular response to organonitrogen compound	2.13293	No
negative regulation of megakaryocyte differentiation	2.12293	No
cold acclimation	2.12167	No
regulation of mitotic nuclear division	2.1208	No
a_nC	2.11981	No
KierFlex	2.11594	No
oxoglutarate dehydrogenase complex	2.10969	No
vsa_hyd	2.09312	No
protein folding	2.08759	No
carnitine shuttle	2.08556	No
negative regulation of pri-miRNA transcription from RNA polymerase II promoter	2.08196	No
PEOE_RPC-	2.0809	No
biotin metabolic process	2.08014	No
FCASA-	2.07367	No
fatty acid biosynthetic process	2.07322	No
positive regulation of inclusion body assembly	2.07013	No
regulation of interleukin-6 production	2.06535	No
FASA_P	2.06522	No
a_hyd	2.06117	No
mitochondrial nucleoid	2.06085	No
regulation of hepatocyte growth factor receptor signaling pathway	2.05909	No
nuclear speck	2.05167	No
positive regulation of skeletal muscle tissue regeneration	2.04226	No
very long-chain fatty acid metabolic process	2.03966	No
behavioral response to starvation	2.03591	No
nuclear-transcribed mRNA catabolic process, nonsense-mediated decay	2.03519	No
lysozyme activity	2.03271	No
SlogP_VSA9	2.02961	No
negative regulation of transforming growth factor beta receptor signaling pathway	2.02534	No
oxidoreductase activity, acting on a sulfur group of donors, NAD(P) as acceptor	2.01967	No
regulation of protein catabolic process	2.01611	No
proteasome regulatory particle, base subcomplex	2.01219	No
response to phenylpropanoid	2.00715	No
[acetyl-CoA carboxylase] kinase activity	2.00361	No
ATP biosynthetic process	1.99715	No
response to camptothecin	1.99648	No
Golgi stack	1.99356	No
response to reactive oxygen species	1.99309	No
pyruvate biosynthetic process	1.98642	No
LogP	1.98446	No
viral transcription	1.98216	No
cell redox homeostasis	1.97831	No
Schmidt-Lanterman incisure	1.97314	No
protein acetylation	1.97035	No
regulation of transcription from RNA polymerase II promoter in response to hypoxia	1.96555	No
response to iron(II) ion	1.95881	No
clathrin-coated endocytic vesicle membrane	1.95878	No
IRE1-mediated unfolded protein response	1.9528	No
LogD(5.5)	1.94741	No
bone trabecula formation	1.93869	No
aspartate catabolic process	1.93064	No
regulation of androgen receptor signaling pathway	1.92805	No
virion assembly	1.92457	No
vsurf_IW3	1.92353	No
endosomal transport	1.92263	No
regulation of vesicle-mediated transport	1.92184	No
glycolytic process	1.9136	No
mitochondrial respiratory chain	1.90487	No
oxygen sensor activity	1.90398	No
LogD(6.5)	1.903	No
actin filament	1.90201	No
ASA-	1.90092	No
negative regulation of glucose import in response to insulin stimulus	1.90066	No
keratan sulfate metabolic process	1.89927	No
positive regulation of intrinsic apoptotic signaling pathway by p53 class mediator	1.89721	No
carnitine metabolic process, CoA-linked	1.89104	No
chiral_u	1.89084	No
regulation of B cell apoptotic process	1.88636	No
negative regulation of PERK-mediated unfolded protein response	1.8855	No
receptor signaling protein tyrosine phosphatase activity	1.88455	No
vsurf_CW3	1.88419	No
regulation of peptidyl-serine phosphorylation	1.88312	No
Q_VSA_PNEG	1.88125	No
positive regulation of gluconeogenesis	1.88041	No
negative regulation of type I interferon production	1.87925	No
catalase activity	1.87848	No
RNA phosphodiester bond hydrolysis, endonucleolytic	1.87826	No
pyruvate dehydrogenase complex	1.87096	No
regulation of telomere maintenance	1.87093	No
proteasome regulatory particle assembly	1.86531	No
sperm motility	1.86495	No
cytoplasmic mRNA processing body	1.85333	No
opr_brigid	1.85052	No
proteasome activator complex	1.84843	No
translational termination	1.84819	No
negative regulation of cellular senescence	1.84334	No
negative regulation of protein dephosphorylation	1.83951	No
elastin metabolic process	1.83811	No
positive regulation of interleukin-1 production	1.83802	No
PEOE_VSA_POS	1.83354	No
nuclear proteasome complex	1.83261	No
vsurf_Wp3	1.83042	No
regulation of cellular amino acid metabolic process	1.83006	No
a_donacc	1.82656	No
regulation of necrotic cell death	1.82617	No
vsurf_HL2	1.8152	No
protein targeting	1.81447	No
keratan sulfate catabolic process	1.81371	No
cytosolic large ribosomal subunit	1.81028	No
positive regulation of polyamine transmembrane transport	1.80701	No
cell cycle arrest	1.80027	No
LogD(2)	1.79386	No
paranodal junction	1.78707	No
branched-chain amino acid catabolic process	1.78591	No
necroptotic process	1.78207	No
complement activation	1.78067	No
actomyosin	1.77408	No
positive regulation of transcription from RNA polymerase II promoter in response to hypoxia	1.77337	No
posttranslational protein targeting to membrane	1.76882	No
negative regulation of androgen receptor signaling pathway	1.76865	No
MDM2/MDM4 family protein binding	1.76628	No
dihydrolipoamide metabolic process	1.76153	No
Q_RPC+	1.75654	No
transcription coactivator activity	1.74868	No
positive regulation of transcription from RNA polymerase II promoter involved in unfolded protein response	1.74253	No
phylloquinone catabolic process	1.73487	No
low-density lipoprotein particle	1.73486	No
nicotinamide N-methyltransferase activity	1.73484	No
[hydroxymethylglutaryl-CoA reductase (NADPH)] kinase activity	1.73405	No
ubiquinol-cytochrome-c reductase activity	1.73023	No
sulfur amino acid metabolic process	1.72944	No
mitochondrial intermembrane space	1.72932	No
isocitrate metabolic process	1.71677	No
NADH metabolic process	1.71283	No
negative regulation of receptor activity	1.71168	No
adipose tissue development	1.70842	No
negative regulation of ubiquitin-protein ligase activity involved in mitotic cell cycle	1.70726	No
positive regulation of interferon-beta production	1.70648	No
lipopolysaccharide binding	1.70614	No
epithelial cell proliferation involved in lung morphogenesis	1.70478	No
granular vesicle	1.70079	No
gluconeogenesis	1.69866	No
cholesterol metabolic process	1.695	No
proteasome-activating ATPase activity	1.69284	No
L-amino acid transport	1.68714	No
translational elongation	1.68684	No
binding	1.67323	No
polyubiquitin binding	1.66974	No
regulation of axon regeneration	1.6693	No
basement membrane disassembly	1.66833	No
response to light intensity	1.6675	No
a_acc	1.66635	No
regulation of cellular ketone metabolic process by positive regulation of transcription from RNA polymerase II promoter	1.6662	No
mitochondrial respiratory chain complex I	1.66277	No
positive regulation of proteasomal ubiquitin-dependent protein catabolic process involved in cellular response to hypoxia	1.66158	No
spermatoproteasome complex	1.66056	No
LogD(10)	1.65882	No
trans-Golgi network membrane organization	1.65741	No
inclusion body	1.65551	No
positive regulation of viral entry into host cell	1.64475	No
a_nH	1.64384	No
hemoglobin metabolic process	1.64137	No
lysosomal lumen	1.64074	No
lipoate metabolic process	1.64037	No
mitophagy	1.63897	No
iron-responsive element binding	1.63882	No
nuclear hormone receptor binding	1.63807	No
tricarboxylic acid cycle	1.63754	No
poly(A)+ mRNA export from nucleus	1.63314	No
chloramphenicol O-acetyltransferase activity	1.63275	No
oxygen homeostasis	1.6324	No
thioredoxin-disulfide reductase activity	1.63017	No
aconitate hydratase activity	1.6293	No
stress-activated protein kinase signaling cascade	1.6293	No
extracellular matrix organization	1.62929	No
oxoglutarate dehydrogenase (succinyl-transferring) activity	1.62588	No
regulation of lipid transport by positive regulation of transcription from RNA polymerase II promoter	1.62583	No
tocotrienol omega-hydroxylase activity	1.62556	No
FIAB_7.4	1.62254	No
vsa_acc	1.62242	No
positive regulation of autophagy	1.62166	No
3 iron, 4 sulfur cluster binding	1.61919	No
ornithine decarboxylase activator activity	1.6189	No
thyrotropin-releasing hormone receptor binding	1.61806	No
biotin carboxylase activity	1.618	No
oxidoreductase activity, acting on the CH-OH group of donors, NAD or NADP as acceptor	1.61613	No
vsurf_G	1.61435	No
negative regulation of transcription from RNA polymerase II promoter	1.61312	No
negative regulation of tyrosine phosphorylation of Stat3 protein	1.60732	No
negative regulation of intracellular estrogen receptor signaling pathway	1.60284	No
pyruvate kinase activity	1.60209	No
lipid biosynthetic process	1.59977	No
positive regulation of interferon-beta biosynthetic process	1.59842	No
internal protein amino acid acetylation	1.59474	No
diiodophenylpyruvate reductase activity	1.59352	No
mevalonate transmembrane transporter activity	1.59324	No
positive regulation of substrate adhesion-dependent cell spreading	1.59318	No
cellular response to exogenous dsRNA	1.58578	No
TPSA	1.5786	No
negative regulation of nucleic acid-templated transcription	1.57613	No
response to muscle inactivity	1.57457	No
metallocarboxypeptidase activity	1.57376	No
I-kappaB phosphorylation	1.57328	No
vsa_pol	1.56912	No
cellular carbohydrate metabolic process	1.56832	No
fibroblast apoptotic process	1.56694	No
negative regulation of NF-kappaB transcription factor activity	1.56503	No
cellular glucose homeostasis	1.56407	No
collagen metabolic process	1.56375	No
fatty acid oxidation	1.56267	No
Q_VSA_FPOL	1.55819	No
proteasome regulatory particle	1.55507	No
olfactory bulb mitral cell layer development	1.55375	No
proteoglycan binding	1.55331	No
endoplasmic reticulum organization	1.54792	No
regulation of ubiquitin-protein ligase activity involved in mitotic cell cycle	1.54756	No
amino acid transmembrane transporter activity	1.54491	No
cilium	1.54353	No
negative regulation of phosphatidylinositol 3-kinase signaling	1.5425	No
aspartate biosynthetic process	1.54226	No
balabanJ	1.5415	No
ornithine decarboxylase activity	1.53977	No
vsurf_W6	1.53809	No
vsurf_A	1.53274	No
glucose metabolic process	1.53266	No
transferase activity	1.53216	No
phosphate ion binding	1.5317	No
radius	1.52975	No
positive regulation of hormone biosynthetic process	1.5294	No
b_1rotN	1.52579	No
L-amino acid transmembrane transporter activity	1.52523	No
receptor-mediated endocytosis	1.52382	No
cellular response to dsRNA	1.52334	No
carnitine biosynthetic process	1.52122	No
diameter	1.5204	No
intermediate-density lipoprotein particle	1.51861	No
positive regulation of NF-kappaB transcription factor activity	1.51514	No
cerebellar cortex formation	1.5151	No
sodium ion transport	1.51129	No
nucleoside diphosphate kinase activity	1.51043	No
osteoblast differentiation	1.51023	No
oxidoreductase activity, acting on NAD(P)H, oxygen as acceptor	1.50976	No
glyceraldehyde oxidoreductase activity	1.50821	No
cellular response to prostaglandin stimulus	1.50532	No
phosphate-containing compound metabolic process	1.5048	No
adaptive immune response	1.50479	No
sulfide oxidation, using sulfide:quinone oxidoreductase	1.50404	No
mitochondrial outer membrane permeabilization	1.50301	No
ephrin receptor activity	1.49736	No
lip_acc	1.49469	No
cytoplasmic microtubule organization	1.49346	No
Q_VSA_POL	1.49251	No
cholesterol homeostasis	1.49224	No
proteasome-mediated ubiquitin-dependent protein catabolic process	1.48657	No
lyase activity	1.48601	No
Schwann cell microvillus	1.48208	No
proteinaceous extracellular matrix	1.48131	No
fatty acid homeostasis	1.47924	No
oxidoreductase activity, acting on the aldehyde or oxo group of donors, disulfide as acceptor	1.47826	No
b_rotN	1.47518	No
carbohydrate phosphorylation	1.47142	No
regulation of transforming growth factor beta2 production	1.46896	No
RNA secondary structure unwinding	1.46812	No
ASA_P	1.46424	No
inner medullary collecting duct development	1.4621	No
cytosolic proteasome complex	1.46031	No
acetyl-CoA metabolic process	1.45907	No
translation elongation factor activity	1.45499	No
female gonad development	1.45373	No
RNA polymerase II repressing transcription factor binding	1.45337	No
mitotic cell cycle checkpoint	1.45315	No
nucleotidyltransferase activity	1.45106	No
ligase activity	1.45072	No
norepinephrine metabolic process	1.44166	No
nucleotide-excision repair, DNA damage recognition	1.44134	No
lipoamide binding	1.42985	No
carbohydrate metabolic process	1.42724	No
axon transport of mitochondrion	1.42658	No
metal ion homeostasis	1.42616	No
collagen catabolic process	1.42486	No
Kier3	1.42395	No
response to fluoride	1.42196	No
proteasome accessory complex	1.41854	No
transcription factor activity, RNA polymerase II transcription factor binding	1.41634	No
oxoglutarate dehydrogenase (NAD+) activity	1.4163	No
positive regulation of B cell differentiation	1.41616	No
naphthalene metabolic process	1.41578	No
maintenance of chromatin silencing	1.41578	No
cellular amino acid catabolic process	1.41577	No
tripeptidase activity	1.41577	No
antigen processing and presentation of exogenous antigen	1.41576	No
proline:sodium symporter activity	1.41575	No
endomitotic cell cycle	1.41575	No
cellular response to interferon-beta	1.41572	No
proline catabolic process	1.41569	No
pyruvate dehydrogenase (NAD+) activity	1.41567	No
tetrahydrofolyl-poly(glutamate) polymer binding	1.41562	No
regulation of MHC class I biosynthetic process	1.41559	No
enoyl-CoA hydratase activity	1.41551	No
pyruvate carboxylase activity	1.41551	No
mevalonate transport	1.41551	No
negative regulation of oxidoreductase activity	1.41548	No
thiamine pyrophosphate binding	1.41548	No
leucine catabolic process	1.41547	No
modulation by virus of host process	1.41523	No
acid phosphatase activity	1.41515	No
nuclear inclusion body	1.41515	No
B cell activation involved in immune response	1.41508	No
cis-Golgi network	1.41489	No
sulfur amino acid catabolic process	1.41483	No
endopeptidase activator activity	1.41468	No
neutral amino acid transport	1.41434	No
double-stranded RNA binding	1.41399	No
vitamin E metabolic process	1.41374	No
angiogenesis involved in wound healing	1.41201	No
Q_VSA_FPNEG	1.41117	No
L-alpha-amino acid transmembrane transport	1.41055	No
putrescine biosynthetic process from ornithine	1.40953	No
histone acetyltransferase complex	1.40312	No
protein phosphatase type 1 complex	1.40246	No
protein peptidyl-prolyl isomerization	1.40166	No
regulation of protein oligomerization	1.40166	No
glucose 6-phosphate metabolic process	1.40156	No
proteasome core complex, alpha-subunit complex	1.39984	No
positive regulation of transcription from RNA polymerase I promoter	1.39842	No
neutral amino acid transmembrane transporter activity	1.39721	No
extracellular fibril organization	1.39682	No
KierA2	1.39513	No
isocitrate dehydrogenase (NADP+) activity	1.39318	No
viral RNA genome packaging	1.39201	No
regulation of chemotaxis	1.39067	No
transcription-coupled nucleotide-excision repair	1.39005	No
laminin-1 binding	1.38967	No
fatty acid beta-oxidation using acyl-CoA oxidase	1.38895	No
alpha-linolenic acid metabolic process	1.38677	No
vitamin D receptor signaling pathway	1.38524	No
regulation of blood coagulation, intrinsic pathway	1.38414	No
early endosome lumen	1.38224	No
regulation of dendritic cell differentiation	1.37823	No
amino acid transport	1.37638	No
programmed necrotic cell death	1.37364	No
UV protection	1.37129	No
peptidyl-lysine acetylation	1.37058	No
spherical high-density lipoprotein particle	1.36933	No
negative regulation of DNA damage response, signal transduction by p53 class mediator	1.36743	No
integrin binding	1.36718	No
fructose metabolic process	1.36629	No
mitochondrial acetyl-CoA biosynthetic process from pyruvate	1.36443	No
immunoglobulin production	1.36168	No
antigen processing and presentation of peptide antigen	1.36087	No
protein export from nucleus	1.35912	No
positive regulation of type I interferon production	1.35761	No
positive regulation of endothelial cell proliferation	1.35569	No
negative regulation of proteasomal protein catabolic process	1.35515	No
blood vessel maturation	1.35348	No
succinyl-CoA metabolic process	1.35262	No
response to electrical stimulus involved in regulation of muscle adaptation	1.35044	No
proteasome storage granule	1.35041	No
positive regulation of protein homooligomerization	1.35009	No
DNA-dependent DNA replication	1.35005	No
macrophage chemotaxis	1.35003	No
lipid particle organization	1.34999	No
arsenite methyltransferase activity	1.34905	No
negative regulation of protein tyrosine kinase activity	1.34844	No
mitochondrial electron transport, ubiquinol to cytochrome c	1.3475	No
proteoglycan metabolic process	1.34724	No
acrosomal matrix	1.34684	No
L-aspartate:2-oxoglutarate aminotransferase activity	1.34601	No
cellular response to nitrite	1.34557	No
melanin biosynthetic process from tyrosine	1.3455	No
fatty acid beta-oxidation using acyl-CoA dehydrogenase	1.34512	No
agmatine biosynthetic process	1.34451	No
translation initiation factor binding	1.3445	No
biotin binding	1.34401	No
purine ribonucleoside triphosphate binding	1.34398	No
glycine metabolic process	1.34298	No
acetyltransferase activity	1.34298	No
vsurf_EWmin3	1.3423	No
DNA-directed DNA polymerase activity	1.34196	No
regulation of neuron death	1.34194	No
termination of RNA polymerase II transcription	1.34148	No
complement activation, alternative pathway	1.34097	No
mitochondrial transport	1.34096	No
putrescine transport	1.34041	No
beta-galactosidase activity	1.34038	No
beta-2-microglobulin binding	1.33996	No
positive regulation of DNA replication	1.33988	No
galactose catabolic process	1.33888	No
cellular carbohydrate catabolic process	1.3388	No
sulfate assimilation	1.33724	No
galactoside binding	1.3369	No
vsurf_CP	1.33684	No
fructose biosynthetic process	1.33579	No
negative regulation of protein acetylation	1.33547	No
complement activation, classical pathway	1.33543	No
positive regulation of pancreatic trypsinogen secretion	1.33391	No
detection of fungus	1.3339	No
glyoxylate cycle	1.33311	No
monosaccharide metabolic process	1.33287	No
lipoate synthase activity	1.33269	No
intramembranous ossification	1.33223	No
ketone body biosynthetic process	1.331	No
negative regulation of cell aging	1.32608	No
vsurf_W8	1.32512	No
cellular response to potassium ion starvation	1.32404	No
peptidyl-serine dephosphorylation	1.32047	No
mesoderm development	1.31807	No
cellular triglyceride homeostasis	1.31747	No
glutathione derivative biosynthetic process	1.31724	No
lipid metabolic process	1.31661	No
gonadotropin-releasing hormone receptor activity	1.31654	No
voltage-gated ion channel activity	1.31523	No
metalloexopeptidase activity	1.30943	No
negative regulation of phosphoprotein phosphatase activity	1.30773	No
glycogen biosynthetic process	1.30581	No
phosphatidylinositol 3-kinase activity	1.30548	No
homocysteine metabolic process	1.30372	No
chaperone-mediated protein folding	1.30367	No
GTP biosynthetic process	1.30278	No
proteolysis	1.30206	No
diamine N-acetyltransferase activity	1.30055	No
transferase activity, transferring acyl groups other than amino-acyl groups	1.29964	No
peptidase activator activity	1.29822	No
peroxisome	1.29725	No
positive regulation of nitric-oxide synthase activity	1.2963	No
second-messenger-mediated signaling	1.29306	No
positive regulation of apoptotic cell clearance	1.29112	No
b_1rotR	1.28822	No
positive regulation of proteasomal ubiquitin-dependent protein catabolic process	1.28748	No
cofactor binding	1.28615	No
aminopeptidase activity	1.28489	No
PEOE_VSA_PNEG	1.28376	No
vsurf_IW4	1.28089	No
lysine catabolic process	1.27918	No
transcription corepressor activity	1.27823	No
metallopeptidase activity	1.27813	No
FCASA+	1.27633	No
putrescine transmembrane transporter activity	1.27531	No
CD40 receptor binding	1.27454	No
steroid hormone receptor activity	1.27439	No
glutamate catabolic process to aspartate	1.27344	No
nuclear-transcribed mRNA poly(A) tail shortening	1.27314	No
vsurf_W2	1.27288	No
negative regulation of transcription from RNA polymerase II promoter in response to endoplasmic reticulum stress	1.27204	No
I-kappaB kinase/NF-kappaB signaling	1.27144	No
interleukin-1, Type II receptor binding	1.27038	No
peptidoglycan binding	1.26987	No
telomerase activity	1.26979	No
negative regulation of behavior	1.2693	No
regulation of signal transduction	1.26757	No
acyl-CoA metabolic process	1.26711	No
UTP binding	1.2671	No
PEOE_VSA+1	1.26681	No
L-fuconate dehydratase activity	1.26659	No
negative regulation of proteasomal ubiquitin-dependent protein catabolic process	1.26576	No
dihydrolipoyl dehydrogenase activity	1.26549	No
vsurf_HB8	1.26538	No
negative regulation of inflammatory response to antigenic stimulus	1.26494	No
telomerase holoenzyme complex	1.26425	No
cellular response to amino acid stimulus	1.26391	No
vitamin transport	1.2639	No
insulin receptor signaling pathway	1.26362	No
positive regulation of hydrogen sulfide biosynthetic process	1.26342	No
polyamine biosynthetic process	1.26334	No
positive regulation of histone H3-K9 acetylation	1.26226	No
unsaturated fatty acid metabolic process	1.2601	No
sarcoplasmic reticulum lumen	1.25944	No
vsurf_IW2	1.25905	No
Sec61 translocon complex	1.25848	No
fatty acid catabolic process	1.25636	No
negative regulation of intracellular steroid hormone receptor signaling pathway	1.25572	No
P-P-bond-hydrolysis-driven protein transmembrane transporter activity	1.25508	No
cell projection cytoplasm	1.25466	No
protein destabilization	1.25359	No
SlogP_VSA2	1.25358	No
petitjean	1.25147	No
2-oxoglutarate metabolic process	1.25141	No
positive regulation of mitotic cell cycle	1.24954	No
AM1_HOMO	1.24921	No
proteasome regulatory particle, lid subcomplex	1.2476	No
ribosome	1.24677	No
catalytic activity	1.24485	No
peroxisomal matrix	1.24316	No
positive regulation of protein monoubiquitination	1.2332	No
transcriptional repressor complex	1.23305	No
regulation of macrophage activation	1.23273	No
vsurf_Wp5	1.23185	No
Hsp90 protein binding	1.23141	No
ossification	1.22987	No
nucleotide-binding domain, leucine rich repeat containing receptor signaling pathway	1.22745	No
ATF6-mediated unfolded protein response	1.22569	No
polyamine metabolic process	1.22484	No
response to exogenous dsRNA	1.22342	No
triglyceride transport	1.22292	No
collagen binding	1.22269	No
interferon-gamma-mediated signaling pathway	1.22245	No
organophosphate catabolic process	1.22197	No
response to interleukin-15	1.21986	No
positive regulation of calcium ion-dependent exocytosis	1.21901	No
25-hydroxycholecalciferol-24-hydroxylase activity	1.21774	No
protein import into nucleus	1.21767	No
proteasomal ubiquitin-independent protein catabolic process	1.21511	No
glutamate catabolic process to 2-oxoglutarate	1.21509	No
integral component of mitochondrial membrane	1.21318	No
ubiquitin-dependent protein catabolic process	1.21317	No
petitjeanSC	1.21122	No
vsurf_EWmin1	1.20675	No
detection of lipopolysaccharide	1.20477	No
GAIT complex	1.20475	No
central nervous system myelin maintenance	1.20439	No
response to nickel cation	1.20144	No
positive regulation of phosphatidylinositol 3-kinase signaling	1.19975	No
kinase binding	1.19945	No
peptidase activity	1.19881	No
vsurf_W5	1.1986	No
hydrogen peroxide catabolic process	1.19702	No
PEOE_VSA+0	1.19634	No
retinoid metabolic process	1.19568	No
FIApH7.4	1.19558	No
vsurf_W3	1.19324	No
endodermal cell differentiation	1.18727	No
regulation of proteasomal protein catabolic process	1.18608	No
proteasome core complex	1.18587	No
positive regulation of erythrocyte differentiation	1.18493	No
regulation of cytokine secretion	1.18456	No
sodium-exporting ATPase activity, phosphorylative mechanism	1.18203	No
very-low-density lipoprotein particle	1.18199	No
low-density lipoprotein particle receptor binding	1.18108	No
cytochrome-b5 reductase activity, acting on NAD(P)H	1.18087	No
sulfonylurea receptor binding	1.18013	No
peptide binding	1.17915	No
protein localization to nucleus	1.1779	No
mammary gland epithelial cell proliferation	1.17787	No
positive regulation of NLRP3 inflammasome complex assembly	1.17753	No
hydrogen ion transmembrane transporter activity	1.1753	No
kidney development	1.17412	No
RNA processing	1.17172	No
modified amino acid binding	1.17023	No
regulation of cell division	1.16784	No
FAD binding	1.16715	No
cell morphogenesis	1.16664	No
xenophagy	1.16646	No
nucleotide-excision repair, DNA gap filling	1.16549	No
putrescine catabolic process	1.16356	No
B cell proliferation involved in immune response	1.16265	No
negative regulation of reactive oxygen species biosynthetic process	1.16257	No
keratinocyte migration	1.16052	No
proteasome assembly	1.15995	No
extracellular region	1.15925	No
NADPH oxidase complex	1.15918	No
arginine biosynthetic process via ornithine	1.15895	No
serine-type peptidase activity	1.15853	No
negative regulation of translation	1.15729	No
positive regulation of peptidase activity	1.15724	No
positive regulation of histone methylation	1.1561	No
glutathione metabolic process	1.15608	No
protein phosphatase regulator activity	1.15376	No
ribosome binding	1.15355	No
negative regulation of oxidative stress-induced neuron death	1.15322	No
protein catabolic process	1.15298	No
meiotic chromosome segregation	1.15248	No
iron ion homeostasis	1.15202	No
exocrine pancreas development	1.15152	No
threonine-type endopeptidase activity	1.1496	No
vsurf_DW12	1.14927	No
metal ion binding	1.14908	No
focal adhesion	1.148	No
nucleobase-containing small molecule interconversion	1.14787	No
transcriptional repressor activity, RNA polymerase II transcription regulatory region sequence-specific binding	1.14643	No
negative regulation of protein localization to plasma membrane	1.14534	No
calcium ion import	1.1444	No
voltage-gated calcium channel activity involved SA node cell action potential	1.14326	No
negative regulation of mitotic cell cycle	1.14312	No
UTP biosynthetic process	1.14101	No
glycoprotein binding	1.14091	No
metalloendopeptidase activity	1.13939	No
vsurf_ID7	1.13863	No
positive regulation of translational initiation	1.1372	No
response to cobalamin	1.13686	No
complement component C1q binding	1.13534	No
lipopolysaccharide receptor activity	1.13454	No
positive regulation of cholesterol storage	1.13354	No
opr_nrot	1.1318	No
endopeptidase inhibitor activity	1.13175	No
triglyceride metabolic process	1.13024	No
leucine transport	1.12944	No
protein processing	1.12763	No
lip_don	1.12722	No
endopeptidase activity	1.12643	No
lipoprotein metabolic process	1.12551	No
lysosomal membrane	1.12487	No
lipoprotein catabolic process	1.12408	No
eye pigment biosynthetic process	1.12206	No
sequestering of calcium ion	1.1218	No
vesicle lumen	1.12146	No
b_rotR	1.11931	No
4-hydroxyproline catabolic process	1.11267	No
mitochondrial pyruvate dehydrogenase complex	1.11206	No
cellular response to fructose stimulus	1.11167	No
clathrin-coated vesicle	1.11075	No
mercury ion binding	1.10986	No
negative regulation of glycolytic process	1.10937	No
activin responsive factor complex	1.10829	No
lipoprotein transport	1.10652	No
cholesterol efflux	1.10625	No
ESC/E(Z) complex	1.10588	No
placenta blood vessel development	1.10441	No
cardiac muscle cell differentiation	1.10388	No
superoxide-generating NADPH oxidase activity	1.1029	No
response to vitamin E	1.10288	No
phosphotransferase activity, alcohol group as acceptor	1.10279	No
low voltage-gated calcium channel activity	1.10245	No
regulation of clathrin-mediated endocytosis	1.10016	No
SMR_VSA5	1.10007	No
response to thyroid hormone	1.09982	No
protein maturation by protein folding	1.09945	No
cysteine-type endopeptidase activator activity involved in apoptotic process	1.09944	No
glutamate-cysteine ligase complex	1.09713	No
peptidyl-prolyl cis-trans isomerase activity	1.0955	No
response to leucine	1.09471	No
artery morphogenesis	1.09361	No
positive regulation of fatty acid beta-oxidation	1.0928	No
recognition of apoptotic cell	1.09278	No
negative regulation of transcription, DNA-templated	1.09255	No
leukocyte migration	1.09157	No
branching morphogenesis of an epithelial tube	1.08944	No
CTP binding	1.08918	No
NF-kappaB binding	1.08844	No
intracellular ribonucleoprotein complex	1.08759	No
positive regulation of macrophage differentiation	1.08362	No
vsurf_EWmin2	1.08346	No
positive regulation by host of viral release from host cell	1.08052	No
positive regulation of glycolytic process	1.07965	No
negative regulation of cytolysis	1.07935	No
Golgi apparatus	1.07903	No
negative regulation of receptor biosynthetic process	1.07891	No
apoptotic process	1.07867	No
MHC class II protein complex binding	1.078	No
cytoplasmic membrane-bounded vesicle lumen	1.07799	No
TBP-class protein binding	1.07607	No
phosphatidylserine decarboxylase activity	1.07511	No
a_don	1.07501	No
negative regulation of histone acetylation	1.07471	No
citrulline metabolic process	1.07441	No
putrescine biosynthetic process	1.07407	No
positive regulation of transcription, DNA-templated	1.0733	No
transcription initiation from RNA polymerase II promoter	1.07285	No
negative regulation of histone H3-K9 methylation	1.07132	No
humoral immune response	1.06779	No
smooth endoplasmic reticulum membrane	1.06587	No
nuclear pore	1.06491	No
Q_VSA_FHYD	1.06239	No
transcription coactivator binding	1.06185	No
regulation of gene expression	1.06083	No
RNA polymerase II transcription factor complex	1.06011	No
CARD domain binding	1.05756	No
vsa_don	1.05695	No
liver development	1.05375	No
cellular response to peptide	1.04908	No
vsurf_ID2	1.04868	No
response to endoplasmic reticulum stress	1.04858	No
vsurf_ID1	1.04849	No
non-membrane spanning protein tyrosine phosphatase activity	1.04752	No
stimulatory C-type lectin receptor signaling pathway	1.04749	No
positive regulation by host of viral transcription	1.04508	No
linoleic acid binding	1.045	No
epithelial to mesenchymal transition	1.04479	No
KierA3	1.03972	No
positive regulation of cell differentiation	1.03937	No
positive regulation of cell division	1.03859	No
vsurf_Wp6	1.03772	No
vsurf_HB4	1.03719	No
protein phosphatase type 2A regulator activity	1.03485	No
response to hydrogen peroxide	1.03361	No
AM1_LUMO	1.03281	No
positive regulation of response to DNA damage stimulus	1.03185	No
oxidoreductase activity	1.03012	No
PEOE_VSA-1	1.02825	No
SlogP_VSA1	1.0267	No
regulation of vascular permeability	1.0246	No
pantothenate metabolic process	1.02416	No
synapse maturation	1.02395	No
FU_7.4	1.0202	No
laminin binding	1.01927	No
NADH dehydrogenase (ubiquinone) activity	1.01763	No
PEOE_VSA+3	1.01726	No
cellular response to nutrient levels	1.01673	No
fat cell differentiation	1.01623	No
vsa_other	1.0149	No
Q_VSA_FNEG	1.01419	No
Q_VSA_PPOS	1.01238	No
negative regulation of extrinsic apoptotic signaling pathway	1.01224	No
sequestering of neurotransmitter	1.01141	No
nitric oxide production involved in inflammatory response	1.00855	No
pericentric heterochromatin	1.00621	No
collagen trimer	1.00341	No
canalicular bile acid transport	1.00339	No
response to activity	1.00237	No
negative regulation of release of cytochrome c from mitochondria	1.00066	No
tRNA binding	1.00056	No
argininosuccinate metabolic process	1.00056	No
telomerase catalytic core complex	1.00056	No
mRNA splicing, via spliceosome	1.00056	No
proteasome complex	1.00056	No
double-strand break repair via break-induced replication	1.00056	No
condensed chromosome kinetochore	1.00056	No
nuclear telomere cap complex	1.00056	No
RNA polymerase II core promoter sequence-specific DNA binding	1.00056	No
core promoter proximal region DNA binding	1.00056	No
blood vessel development	1.00056	No
L-amino-acid oxidase activity	1.00056	No
immunological synapse	1.00056	No
blastocyst development	1.00056	No
negative regulation of complement activation, lectin pathway	1.00056	No
negative regulation of receptor recycling	1.00056	No
lymph vessel development	1.00056	No
regulation of cell-matrix adhesion	1.00056	No
regulation of heart rate	1.00056	No
epithelial cell development	1.00056	No
positive regulation of defense response to virus by host	1.00056	No
T cell proliferation involved in immune response	1.00056	No
plasma cell differentiation	1.00056	No
immune system process	1.00056	No
antigen processing and presentation of exogenous peptide antigen via MHC class I, TAP-dependent	1.00056	No
outflow tract morphogenesis	1.00056	No
cardiac neural crest cell migration involved in outflow tract morphogenesis	1.00056	No
amino acid transmembrane transport	1.00056	No
double-stranded DNA binding	1.00056	No
transcription cofactor activity	1.00056	No
telomerase RNA reverse transcriptase activity	1.00056	No
protein-glutamine gamma-glutamyltransferase activity	1.00056	No
3-hydroxybutyrate dehydrogenase activity	1.00056	No
3-methyl-2-oxobutanoate dehydrogenase (2-methylpropanoyl-transferring) activity	1.00056	No
D-amino-acid oxidase activity	1.00056	No
DNA topoisomerase type II (ATP-hydrolyzing) activity	1.00056	No
acyl-CoA dehydrogenase activity	1.00056	No
ATP-dependent RNA helicase activity	1.00056	No
aldehyde dehydrogenase [NAD(P)+] activity	1.00056	No
argininosuccinate synthase activity	1.00056	No
carnitine O-acetyltransferase activity	1.00056	No
cystathionine beta-synthase activity	1.00056	No
cysteine synthase activity	1.00056	No
3-hydroxypalmitoyl-[acyl-carrier-protein] dehydratase activity	1.00056	No
enoyl-[acyl-carrier-protein] reductase (NADPH, B-specific) activity	1.00056	No
glucokinase activity	1.00056	No
glucose-6-phosphatase activity	1.00056	No
glutathione synthase activity	1.00056	No
glycine hydroxymethyltransferase activity	1.00056	No
phosphatidylinositol-3-phosphatase activity	1.00056	No
isocitrate dehydrogenase activity	1.00056	No
malic enzyme activity	1.00056	No
methylenetetrahydrofolate dehydrogenase (NADP+) activity	1.00056	No
methylenetetrahydrofolate reductase (NAD(P)H) activity	1.00056	No
ribonuclease activity	1.00056	No
ornithine carbamoyltransferase activity	1.00056	No
phosphoenolpyruvate carboxykinase (GTP) activity	1.00056	No
3-phosphoinositide-dependent protein kinase activity	1.00056	No
MAP kinase kinase activity	1.00056	No
spermidine synthase activity	1.00056	No
thiosulfate sulfurtransferase activity	1.00056	No
transferrin receptor activity	1.00056	No
interleukin-8 receptor binding	1.00056	No
platelet-derived growth factor receptor binding	1.00056	No
structural molecule activity	1.00056	No
chloride channel activity	1.00056	No
lipid transporter activity	1.00056	No
neurotransmitter transporter activity	1.00056	No
low-affinity glucose:sodium symporter activity	1.00056	No
phosphatidylinositol-3,4,5-trisphosphate binding	1.00056	No
DNA-directed RNA polymerase II, core complex	1.00056	No
chromatin silencing complex	1.00056	No
Golgi-associated vesicle	1.00056	No
microtubule organizing center	1.00056	No
polysome	1.00056	No
intermediate filament	1.00056	No
coated pit	1.00056	No
fructose 2,6-bisphosphate metabolic process	1.00056	No
oxaloacetate metabolic process	1.00056	No
malate metabolic process	1.00056	No
regulation of glycolytic process	1.00056	No
mitochondrial electron transport, succinate to ubiquinone	1.00056	No
nucleotide-excision repair	1.00056	No
double-strand break repair via nonhomologous end joining	1.00056	No
mitotic recombination	1.00056	No
establishment of chromatin silencing	1.00056	No
mRNA polyadenylation	1.00056	No
mRNA catabolic process	1.00056	No
regulation of translational initiation	1.00056	No
cellular protein modification process	1.00056	No
protein monoubiquitination	1.00056	No
protein deglycosylation	1.00056	No
cellular amino acid metabolic process	1.00056	No
cysteine metabolic process	1.00056	No
methionine metabolic process	1.00056	No
S-adenosylmethionine biosynthetic process	1.00056	No
L-serine metabolic process	1.00056	No
L-serine biosynthetic process	1.00056	No
L-serine catabolic process	1.00056	No
ornithine metabolic process	1.00056	No
ornithine catabolic process	1.00056	No
sesquiterpenoid metabolic process	1.00056	No
NADPH regeneration	1.00056	No
folic acid-containing compound metabolic process	1.00056	No
vitamin A metabolic process	1.00056	No
superoxide metabolic process	1.00056	No
cellular sodium ion homeostasis	1.00056	No
telomere maintenance via telomerase	1.00056	No
meiosis I	1.00056	No
reciprocal meiotic recombination	1.00056	No
neuron cell-cell adhesion	1.00056	No
calcium-independent cell-matrix adhesion	1.00056	No
enzyme linked receptor protein signaling pathway	1.00056	No
SMAD protein import into nucleus	1.00056	No
tyrosine phosphorylation of STAT protein	1.00056	No
positive regulation of transcription from RNA polymerase II promoter by pheromones	1.00056	No
negative regulation of neuroblast proliferation	1.00056	No
salivary gland development	1.00056	No
salivary gland morphogenesis	1.00056	No
5S rRNA binding	1.00056	No
protein tyrosine phosphatase activator activity	1.00056	No
eukaryotic initiation factor 4E binding	1.00056	No
opsonization	1.00056	No
3-oxoacid CoA-transferase activity	1.00056	No
axon ensheathment	1.00056	No
3'-5' exonuclease activity	1.00056	No
calcitriol receptor activity	1.00056	No
alanine-glyoxylate transaminase activity	1.00056	No
protein transporter activity	1.00056	No
hexose transport	1.00056	No
phospholipid biosynthetic process	1.00056	No
agmatinase activity	1.00056	No
glycoprotein biosynthetic process	1.00056	No
lipoate biosynthetic process	1.00056	No
nucleoside triphosphate biosynthetic process	1.00056	No
protein lipoylation	1.00056	No
ribonucleotide metabolic process	1.00056	No
mRNA transcription	1.00056	No
response to xenobiotic stimulus	1.00056	No
glyoxylate catabolic process	1.00056	No
hormone-mediated signaling pathway	1.00056	No
defense response to fungus, incompatible interaction	1.00056	No
endosome membrane	1.00056	No
maintenance of DNA methylation	1.00056	No
centriole-centriole cohesion	1.00056	No
gene expression	1.00056	No
proteasomal protein catabolic process	1.00056	No
positive regulation of platelet activation	1.00056	No
positive regulation of mitochondrion organization	1.00056	No
positive regulation of receptor biosynthetic process	1.00056	No
negative regulation of triglyceride catabolic process	1.00056	No
positive regulation of endopeptidase activity	1.00056	No
positive regulation of vitamin D 24-hydroxylase activity	1.00056	No
regulation of translational initiation by eIF2 alpha phosphorylation	1.00056	No
astrocyte development	1.00056	No
response to muscle activity	1.00056	No
regulation of skeletal muscle contraction via regulation of action potential	1.00056	No
heparan sulfate proteoglycan biosynthetic process	1.00056	No
Cajal body	1.00056	No
peptide disulfide oxidoreductase activity	1.00056	No
lactate transmembrane transporter activity	1.00056	No
citrate transmembrane transporter activity	1.00056	No
aromatic amino acid transmembrane transporter activity	1.00056	No
L-aspartate transmembrane transporter activity	1.00056	No
oxygen transport	1.00056	No
organic cation transport	1.00056	No
monocarboxylic acid transport	1.00056	No
citrate transport	1.00056	No
glucose-6-phosphate transport	1.00056	No
myo-inositol transport	1.00056	No
aromatic amino acid transport	1.00056	No
proline transport	1.00056	No
aminergic neurotransmitter loading into synaptic vesicle	1.00056	No
phospholipid transport	1.00056	No
NAD(P)H oxidase activity	1.00056	No
regulation of macroautophagy	1.00056	No
negative regulation of macroautophagy	1.00056	No
eukaryotic translation initiation factor 4F complex	1.00056	No
1-phosphatidylinositol-3-kinase activity	1.00056	No
phosphatidylinositol-3,4,5-trisphosphate 3-phosphatase activity	1.00056	No
RISC complex	1.00056	No
somatic hypermutation of immunoglobulin genes	1.00056	No
oxidoreductase activity, acting on the aldehyde or oxo group of donors, NAD or NADP as acceptor	1.00056	No
oxidoreductase activity, acting on paired donors, with incorporation or reduction of molecular oxygen, 2-oxoglutarate as one donor, and incorporation of one atom each of oxygen into both donors	1.00056	No
carboxyl- or carbamoyltransferase activity	1.00056	No
hydrolase activity	1.00056	No
hydrolase activity, acting on carbon-nitrogen (but not peptide) bonds, in linear amidines	1.00056	No
purine nucleotide binding	1.00056	No
triglyceride binding	1.00056	No
vinculin binding	1.00056	No
protein-chromophore linkage	1.00056	No
(S)-limonene 7-monooxygenase activity	1.00056	No
arsonoacetate metabolic process	1.00056	No
evasion or tolerance of host defenses by virus	1.00056	No
uncoating of virus	1.00056	No
viral release from host cell	1.00056	No
aminobutyraldehyde dehydrogenase activity	1.00056	No
phosphatase activator activity	1.00056	No
glycine biosynthetic process from serine	1.00056	No
glycine biosynthetic process, by transamination of glyoxylate	1.00056	No
siderophore biosynthetic process	1.00056	No
cysteine biosynthetic process	1.00056	No
L-cysteine catabolic process	1.00056	No
cytolysis	1.00056	No
antigen processing and presentation	1.00056	No
antigen processing and presentation of endogenous peptide antigen via MHC class I	1.00056	No
antigen processing and presentation of exogenous peptide antigen via MHC class II	1.00056	No
protein kinase regulator activity	1.00056	No
extrinsic component of membrane	1.00056	No
amygdala development	1.00056	No
tangential migration from the subventricular zone to the olfactory bulb	1.00056	No
telencephalon cell migration	1.00056	No
negative regulation of cell-cell adhesion	1.00056	No
oogenesis stage	1.00056	No
cytosolic ribosome	1.00056	No
electron transport chain	1.00056	No
actin filament-based movement	1.00056	No
L-malate dehydrogenase activity	1.00056	No
transport vesicle	1.00056	No
integral component of Golgi membrane	1.00056	No
estrogen receptor activity	1.00056	No
1-alpha,25-dihydroxyvitamin D3 24-hydroxylase activity	1.00056	No
translation repressor activity	1.00056	No
production of siRNA involved in RNA interference	1.00056	No
ER-associated ubiquitin-dependent protein catabolic process	1.00056	No
BMP signaling pathway	1.00056	No
Hsp70 protein binding	1.00056	No
phagocytic vesicle membrane	1.00056	No
guanidinoacetate N-methyltransferase activity	1.00056	No
methylarsonite methyltransferase activity	1.00056	No
thyroid gland development	1.00056	No
retrograde protein transport, ER to cytosol	1.00056	No
regulation of histone methylation	1.00056	No
mRNA 3'-end processing	1.00056	No
phosphatidylcholine binding	1.00056	No
intrinsic component of membrane	1.00056	No
anchored component of membrane	1.00056	No
cell leading edge	1.00056	No
lamellipodium membrane	1.00056	No
keratinization	1.00056	No
titin binding	1.00056	No
glycine betaine transport	1.00056	No
negative regulation of myelination	1.00056	No
negative regulation of cyclin-dependent protein serine/threonine kinase activity involved in G1/S transition of mitotic cell cycle	1.00056	No
regulation of glucocorticoid metabolic process	1.00056	No
mineralocorticoid receptor signaling pathway	1.00056	No
thioesterase binding	1.00056	No
negative regulation of TOR signaling	1.00056	No
myosin light chain binding	1.00056	No
secretory granule localization	1.00056	No
alanine transport	1.00056	No
positive regulation of intracellular cholesterol transport	1.00056	No
regulation of cytokinesis	1.00056	No
response to retinoic acid	1.00056	No
interferon-gamma production	1.00056	No
negative regulation of interleukin-17 production	1.00056	No
negative regulation of interleukin-23 production	1.00056	No
negative regulation of interleukin-5 production	1.00056	No
positive regulation of interleukin-1 beta production	1.00056	No
RNA biosynthetic process	1.00056	No
spermidine acetylation	1.00056	No
circadian regulation of gene expression	1.00056	No
inositol trisphosphate biosynthetic process	1.00056	No
regulation of intracellular protein transport	1.00056	No
response to hydroperoxide	1.00056	No
putrescine biosynthetic process from arginine	1.00056	No
rDNA heterochromatin	1.00056	No
propanoyl-CoA C-acyltransferase activity	1.00056	No
heterotypic cell-cell adhesion	1.00056	No
very-low-density lipoprotein particle binding	1.00056	No
negative regulation of GTPase activity	1.00056	No
response to interferon-gamma	1.00056	No
regulation of smooth muscle cell apoptotic process	1.00056	No
protein folding in endoplasmic reticulum	1.00056	No
hindlimb morphogenesis	1.00056	No
miRNA binding	1.00056	No
ciliary rootlet	1.00056	No
histone-serine phosphorylation	1.00056	No
C-terminal protein deglutamylation	1.00056	No
enteric smooth muscle cell differentiation	1.00056	No
natural killer cell chemotaxis	1.00056	No
myelin sheath adaxonal region	1.00056	No
interleukin-4-mediated signaling pathway	1.00056	No
platelet-derived growth factor receptor-beta signaling pathway	1.00056	No
plasma membrane lactate transport	1.00056	No
aorta morphogenesis	1.00056	No
cellular response to trichostatin A	1.00056	No
cellular response to erythropoietin	1.00056	No
endolysosome lumen	1.00056	No
interstrand cross-link repair	1.00056	No
phosphatidylinositol 3-kinase regulatory subunit binding	1.00056	No
regulation of translational initiation by eIF2 alpha dephosphorylation	1.00056	No
RNA polymerase II transcription factor activity, estrogen-activated sequence-specific DNA binding	1.00056	No
cellular response to glucose starvation	1.00056	No
telomeric DNA binding	1.00056	No
DNA protection	1.00056	No
protection from natural killer cell mediated cytotoxicity	1.00056	No
ribosomal small subunit biogenesis	1.00056	No
vitamin D catabolic process	1.00056	No
negative regulation of tyrosine phosphorylation of Stat5 protein	1.00056	No
positive regulation of tumor necrosis factor biosynthetic process	1.00056	No
neuron maturation	1.00056	No
retinoic acid metabolic process	1.00056	No
antigen processing and presentation of exogenous peptide antigen via MHC class I	1.00056	No
MHC class I protein complex	1.00056	No
MHC class I peptide loading complex	1.00056	No
enterobactin transporter activity	1.00056	No
alpha-tubulin binding	1.00056	No
positive regulation of programmed cell death	1.00056	No
positive regulation of catalytic activity	1.00056	No
single-stranded DNA-dependent ATPase activity	1.00056	No
cell envelope organization	1.00056	No
protein unfolding	1.00056	No
negative regulation of MAPK cascade	1.00056	No
malate-aspartate shuttle	1.00056	No
negative regulation of insulin-like growth factor receptor signaling pathway	1.00056	No
dicarboxylic acid metabolic process	1.00056	No
linoleic acid metabolic process	1.00056	No
negative regulation by host of viral transcription	1.00056	No
DNA hypermethylation	1.00056	No
protein binding involved in protein folding	1.00056	No
axonal growth cone	1.00056	No
cellular response to leptin stimulus	1.00056	No
long-chain fatty acid import	1.00056	No
response to human chorionic gonadotropin	1.00056	No
cell cycle phase transition	1.00056	No
positive regulation by host of viral process	1.00056	No
actin nucleation	1.00056	No
regulation of viral genome replication	1.00056	No
regulation of bone resorption	1.00056	No
meiotic telomere clustering	1.00056	No
homologous chromosome segregation	1.00056	No
dynein intermediate chain binding	1.00056	No
negative regulation of macrophage differentiation	1.00056	No
negative regulation of monocyte differentiation	1.00056	No
positive regulation of epidermis development	1.00056	No
positive regulation of low-density lipoprotein particle receptor biosynthetic process	1.00056	No
negative regulation of cell size	1.00056	No
negative regulation of growth	1.00056	No
negative regulation of translational initiation	1.00056	No
pyrimidine nucleoside biosynthetic process	1.00056	No
formaldehyde metabolic process	1.00056	No
glucose import	1.00056	No
glycerol biosynthetic process from pyruvate	1.00056	No
carboxylic acid catabolic process	1.00056	No
D-amino acid metabolic process	1.00056	No
negative regulation of JAK-STAT cascade	1.00056	No
positive regulation of organ growth	1.00056	No
retinal cell programmed cell death	1.00056	No
active induction of host immune response by virus	1.00056	No
virion binding	1.00056	No
phosphorylated carbohydrate dephosphorylation	1.00056	No
phosphatidylinositol dephosphorylation	1.00056	No
ephrin receptor binding	1.00056	No
response to cycloheximide	1.00056	No
pore complex assembly	1.00056	No
TAP binding	1.00056	No
enoyl-[acyl-carrier-protein] reductase (NADPH, A-specific) activity	1.00056	No
nicotinamide phosphoribosyltransferase activity	1.00056	No
mitochondrion transport along microtubule	1.00056	No
glycine N-acyltransferase activity	1.00056	No
positive regulation of fibroblast proliferation	1.00056	No
epidermal growth factor binding	1.00056	No
negative regulation of skeletal muscle tissue development	1.00056	No
positive regulation of skeletal muscle tissue development	1.00056	No
embryonic skeletal system morphogenesis	1.00056	No
positive regulation of skeletal muscle fiber development	1.00056	No
tissue remodeling	1.00056	No
forebrain morphogenesis	1.00056	No
formation of anatomical boundary	1.00056	No
stem cell differentiation	1.00056	No
androgen receptor binding	1.00056	No
negative regulation of axonogenesis	1.00056	No
regulation of synapse structure or activity	1.00056	No
phosphoserine binding	1.00056	No
phosphothreonine binding	1.00056	No
detection of chemical stimulus involved in sensory perception	1.00056	No
detection of mechanical stimulus involved in sensory perception	1.00056	No
Rho GDP-dissociation inhibitor binding	1.00056	No
rRNA transport	1.00056	No
regulation of binding	1.00056	No
positive regulation of DNA ligation	1.00056	No
spindle midzone	1.00056	No
positive regulation of ubiquitin-protein ligase activity involved in regulation of mitotic cell cycle transition	1.00056	No
positive regulation of ubiquitin-protein transferase activity	1.00056	No
smooth endoplasmic reticulum calcium ion homeostasis	1.00056	No
detection of glucose	1.00056	No
proteolysis involved in cellular protein catabolic process	1.00056	No
medium-chain fatty acid metabolic process	1.00056	No
regulation of hair follicle development	1.00056	No
positive regulation of attachment of spindle microtubules to kinetochore	1.00056	No
arachidonic acid omega-hydroxylase activity	1.00056	No
alpha-tocopherol omega-hydroxylase activity	1.00056	No
oxidoreductase activity, acting on the CH-CH group of donors, with a flavin as acceptor	1.00056	No
cardiac muscle cell development	1.00056	No
recycling endosome membrane	1.00056	No
copper ion homeostasis	1.00056	No
anion homeostasis	1.00056	No
negative regulation of interferon-gamma-mediated signaling pathway	1.00056	No
negative regulation of type I interferon-mediated signaling pathway	1.00056	No
regulation of cellular localization	1.00056	No
response to growth hormone	1.00056	No
epithelial cell maturation involved in salivary gland development	1.00056	No
intestinal epithelial structure maintenance	1.00056	No
mammary gland alveolus development	1.00056	No
negative regulation of response to cytokine stimulus	1.00056	No
positive regulation of macrophage cytokine production	1.00056	No
negative regulation of dendritic spine morphogenesis	1.00056	No
membrane organization	1.00056	No
positive regulation of myeloid leukocyte cytokine production involved in immune response	1.00056	No
positive regulation of transcription from RNA polymerase II promoter in response to acidic pH	1.00056	No
chaperone-mediated autophagy	1.00056	No
metalloaminopeptidase activity	1.00056	No
intrinsic apoptotic signaling pathway in response to endoplasmic reticulum stress	1.00056	No
clathrin-sculpted monoamine transport vesicle membrane	1.00056	No
D-serine metabolic process	1.00056	No
chromosome organization involved in meiotic cell cycle	1.00056	No
T cell apoptotic process	1.00056	No
thyroid hormone transport	1.00056	No
chaperone cofactor-dependent protein refolding	1.00056	No
co-SMAD binding	1.00056	No
cellular response to cold	1.00056	No
oleic acid binding	1.00056	No
lysine-acetylated histone binding	1.00056	No
mitochondrion morphogenesis	1.00056	No
MLL5-L complex	1.00056	No
response to biotin	1.00056	No
serine binding	1.00056	No
error-free translesion synthesis	1.00056	No
cellular response to lipoteichoic acid	1.00056	No
cellular response to muramyl dipeptide	1.00056	No
cellular response to lithium ion	1.00056	No
cellular response to cAMP	1.00056	No
cellular response to prostaglandin E stimulus	1.00056	No
ankyrin repeat binding	1.00056	No
protein transmembrane transport	1.00056	No
HMG box domain binding	1.00056	No
response to norepinephrine	1.00056	No
neutrophil extravasation	1.00056	No
L-aspartate transmembrane transport	1.00056	No
positive regulation of protein kinase C signaling	1.00056	No
negative regulation of ribosome biogenesis	1.00056	No
negative regulation of mitochondrial fission	1.00056	No
lymphocyte migration into lymphoid organs	1.00056	No
cellular response to thyroid hormone stimulus	1.00056	No
presynaptic membrane assembly	1.00056	No
regulation of phenotypic switching by transcription from RNA polymerase II promoter	1.00056	No
negative regulation of endoplasmic reticulum unfolded protein response	1.00056	No
positive regulation of receptor binding	1.00056	No
regulation of protein localization to nucleus	1.00056	No
negative regulation of potassium ion transmembrane transporter activity	1.00056	No
lipid hydroperoxide transport	1.00056	No
positive regulation of cellular respiration	1.00056	No
positive regulation of mitochondrial DNA metabolic process	1.00056	No
positive regulation of muscle tissue development	1.00056	No
negative regulation of interleukin-2-mediated signaling pathway	1.00056	No
negative regulation of interleukin-4-mediated signaling pathway	1.00056	No
negative regulation of macrophage colony-stimulating factor signaling pathway	1.00056	No
negative regulation of positive thymic T cell selection	1.00056	No
positive regulation of endoplasmic reticulum stress-induced intrinsic apoptotic signaling pathway	1.00056	No
regulation of extracellular matrix organization	1.00056	No
regulation of calcium ion transmembrane transport	1.00056	No
positive regulation of reactive oxygen species biosynthetic process	1.00056	No
positive regulation of lactation	1.00056	No
positive regulation of dendrite extension	1.00056	No
estradiol binding	1.00056	No
response to bisphenol A	1.00056	No
Ac-Asp-Glu binding	1.00056	No
positive regulation of glomerular visceral epithelial cell apoptotic process	1.00056	No
cellular response to ionomycin	1.00056	No
cellular response to resveratrol	1.00056	No
glucose transmembrane transport	1.00056	No
Lewy body core	1.00056	No
peptidyl-tyrosine dephosphorylation involved in inactivation of protein kinase activity	1.00056	No
embryonic liver development	1.00056	No
protein antigen binding	1.00056	No
HSP90-CDC37 chaperone complex	1.00056	No
HFE-transferrin receptor complex	1.00056	No
response to manganese-induced endoplasmic reticulum stress	1.00056	No
growth cone filopodium	1.00056	No
promoter-specific chromatin binding	1.00056	No
subsarcolemmal mitochondrion	1.00056	No
interfibrillar mitochondrion	1.00056	No
adaptive thermogenesis	1.00056	No
negative regulation of protein localization to cell surface	1.00056	No
negative regulation of fibroblast apoptotic process	1.00056	No
positive regulation of hepatocyte proliferation	1.00056	No
negative regulation of reactive oxygen species metabolic process	1.00056	No
positive regulation of dendritic cell chemotaxis	1.00056	No
negative regulation of platelet-derived growth factor receptor-beta signaling pathway	1.00056	No
negative regulation of miRNA metabolic process	1.00056	No
positive regulation of stem cell proliferation	1.00056	No
regulation of genetic imprinting	1.00056	No
negative regulation of cellular response to testosterone stimulus	1.00056	No
histone H3-S10 phosphorylation involved in chromosome condensation	1.00056	No
regulation of response to DNA damage stimulus	1.00056	No
malonyl-CoA biosynthetic process	1.00056	No
myeloid dendritic cell differentiation	1.00056	No
frontal suture morphogenesis	1.00056	No
positive regulation of epithelial cell migration	1.00006	No
MADS box domain binding	0.999453	No
MyD88-dependent toll-like receptor signaling pathway	0.99881	No
BH domain binding	0.998677	No
reproductive process	0.99817	No
regulation of immunoglobulin secretion	0.997929	No
replication fork	0.996566	No
lens fiber cell differentiation	0.996156	No
growth factor receptor binding	0.994766	No
oleoyl-[acyl-carrier-protein] hydrolase activity	0.994733	No
myofibril	0.994029	No
negative regulation of translational initiation in response to stress	0.993725	No
toll-like receptor signaling pathway	0.992483	No
leading edge cell differentiation	0.992218	No
regulation of glycogen biosynthetic process	0.991818	No
pre-mRNA intronic binding	0.99104	No
apoptosome	0.990999	No
positive regulation of cardiac muscle hypertrophy	0.990119	No
peptidyl-serine autophosphorylation	0.990001	No
eiF2alpha phosphorylation in response to endoplasmic reticulum stress	0.989595	No
SlogP_VSA7	0.989281	No
positive regulation of monocyte differentiation	0.988886	No
DNA damage response, detection of DNA damage	0.988863	No
aromatic compound catabolic process	0.988772	No
protein dimerization activity	0.987912	No
error-prone translesion synthesis	0.987728	No
positive regulation of endoplasmic reticulum unfolded protein response	0.98743	No
mitochondrial membrane	0.986603	No
vsurf_ID5	0.986553	No
detection of virus	0.985546	No
sarcomere	0.985014	No
post-anal tail morphogenesis	0.984352	No
vsurf_W7	0.983	No
SMAD protein complex assembly	0.982026	No
dendritic spine morphogenesis	0.981736	No
viral process	0.981732	No
L-methionine biosynthetic process from methylthioadenosine	0.981463	No
peptidyl-tyrosine phosphorylation	0.979426	No
dioxygenase activity	0.97912	No
receptor binding	0.979087	No
synaptic vesicle docking	0.9788	No
C21-steroid hormone biosynthetic process	0.978624	No
chromatin silencing at rDNA	0.978249	No
cellular response to insulin stimulus	0.977432	No
positive regulation of steroid metabolic process	0.977209	No
activation of cysteine-type endopeptidase activity	0.974776	No
protein tetramerization	0.97386	No
histone kinase activity	0.973452	No
leukotriene-B4 20-monooxygenase activity	0.971737	No
cellular amino acid biosynthetic process	0.971704	No
SMAD protein signal transduction	0.971234	No
spermidine biosynthetic process	0.970181	No
response to vitamin A	0.970063	No
cellular senescence	0.970038	No
arachidonic acid epoxygenase activity	0.969906	No
regulation of embryonic development	0.969488	No
3-beta-hydroxy-delta5-steroid dehydrogenase activity	0.965865	No
positive regulation of JNK cascade	0.964126	No
entry into host cell	0.96386	No
Bergmann glial cell differentiation	0.962882	No
oogenesis	0.96258	No
carboxypeptidase activity	0.962069	No
PTB domain binding	0.961969	No
p53 binding	0.961559	No
cell surface receptor signaling pathway	0.961394	No
'de novo' pyrimidine nucleobase biosynthetic process	0.961281	No
dense core granule	0.961037	No
vsurf_CW7	0.9597	No
negative regulation of cartilage development	0.959625	No
cellular response to high density lipoprotein particle stimulus	0.958886	No
endocytic vesicle membrane	0.957731	No
steroid binding	0.957613	No
aryldialkylphosphatase activity	0.956868	No
transferase activity, transferring acyl groups	0.956077	No
positive regulation of fat cell differentiation	0.953748	No
cellular response to decreased oxygen levels	0.953111	No
multicellular organism growth	0.952158	No
nucleobase-containing small molecule metabolic process	0.951522	No
T cell activation	0.951087	No
transcription factor activity, RNA polymerase II distal enhancer sequence-specific binding	0.949948	No
iron ion import	0.949816	No
PEOE_VSA-4	0.949329	No
purine nucleotide catabolic process	0.94733	No
cellular response to arsenic-containing substance	0.946408	No
positive regulation of viral transcription	0.944051	No
vsurf_W4	0.943017	No
regulation of protein phosphatase type 2A activity	0.942632	No
sperm capacitation	0.941658	No
gonadotropin hormone-releasing hormone activity	0.940041	No
chondrocyte development	0.937358	No
pyramidal neuron development	0.937203	No
regulation of type I interferon-mediated signaling pathway	0.935251	No
extracellular matrix	0.931265	No
negative regulation of cholesterol storage	0.928286	No
positive regulation of myoblast proliferation	0.927458	No
extracellular matrix disassembly	0.926874	No
nucleoplasm	0.925573	No
positive regulation of macroautophagy	0.925472	No
peptidyl-tyrosine dephosphorylation	0.925467	No
cellular nitrogen compound metabolic process	0.921927	No
regulation of receptor recycling	0.920869	No
negative regulation of interleukin-10 production	0.920731	No
early endosome membrane	0.920426	No
protein serine/threonine kinase activator activity	0.91861	No
SlogP_VSA8	0.916334	No
cysteine-type endopeptidase activity	0.916303	No
positive regulation of mitotic nuclear division	0.913701	No
positive regulation of protein acetylation	0.913294	No
positive regulation of apoptotic signaling pathway	0.912553	No
RNA polymerase II transcription factor binding	0.911949	No
SMR_VSA0	0.911437	No
intracellular canaliculus	0.910612	No
synaptobrevin 2-SNAP-25-syntaxin-1a-complexin I complex	0.910006	No
negative regulation of epithelial cell proliferation	0.910003	No
chaperone binding	0.909083	No
Peyer's patch morphogenesis	0.90882	No
galactose metabolic process	0.907834	No
negative regulation of cell death	0.907689	No
RNA polymerase II transcription factor activity, ligand-activated sequence-specific DNA binding	0.906628	No
steroid sulfotransferase activity	0.906391	No
chromosome organization	0.906219	No
cellular response to carbohydrate stimulus	0.904799	No
positive regulation of gene expression	0.904205	No
NAD(P)H dehydrogenase (quinone) activity	0.903942	No
negative regulation of viral genome replication	0.903268	No
re-entry into mitotic cell cycle	0.902954	No
vsurf_HB2	0.902812	No
activation of MAPK activity	0.901845	No
fatty acid synthase activity	0.901004	No
acetaldehyde metabolic process	0.90054	No
cardiac right ventricle morphogenesis	0.899863	No
regulation of female receptivity	0.899629	No
negative regulation of interleukin-12 biosynthetic process	0.89916	No
lipopolysaccharide receptor complex	0.89911	No
response to magnesium ion	0.899022	No
toll-like receptor 3 signaling pathway	0.898113	No
hydrolase activity, hydrolyzing O-glycosyl compounds	0.897963	No
negative regulation of tyrosine phosphorylation of Stat1 protein	0.895983	No
apical part of cell	0.895511	No
symporter activity	0.895441	No
voltage-gated potassium channel activity involved in bundle of His cell action potential repolarization	0.89521	No
peptide cross-linking	0.893777	No
aryl sulfotransferase activity	0.893543	No
activation of APC-Cdc20 complex activity	0.893511	No
positive regulation of oligodendrocyte differentiation	0.893444	No
regulation of defense response to virus by virus	0.891266	No
peptidyl-cysteine S-nitrosylase activity	0.890772	No
hepatic stellate cell activation	0.890727	No
mRNA processing	0.890519	No
negative regulation of epithelial cell differentiation	0.888877	No
extracellular matrix binding	0.888078	No
lung morphogenesis	0.887842	No
PEOE_VSA-0	0.884929	No
protein tyrosine phosphatase activity	0.884443	No
SMAD binding	0.883752	No
oxidation-reduction process	0.883707	No
transport	0.881809	No
cell morphogenesis involved in neuron differentiation	0.879974	No
semaphorin-plexin signaling pathway	0.879006	No
intracellular estrogen receptor signaling pathway	0.878698	No
multicellular organism development	0.878636	No
regulation of synaptic transmission, GABAergic	0.877617	No
double-strand break repair via homologous recombination	0.875785	No
vsurf_Wp4	0.873037	No
positive regulation of receptor internalization	0.870744	No
identical protein binding	0.869838	No
MyD88-independent toll-like receptor signaling pathway	0.869798	No
skeletal system morphogenesis	0.867341	No
pressure natriuresis	0.866731	No
peroxynitrite reductase activity	0.866519	No
phosphatidylinositol phosphorylation	0.865129	No
response to starvation	0.859546	No
positive regulation of endothelial cell apoptotic process	0.859543	No
cytoplasmic vesicle membrane	0.858889	No
toll-like receptor 2 signaling pathway	0.858594	No
G2/M transition of mitotic cell cycle	0.857137	No
response to virus	0.856447	No
face morphogenesis	0.856385	No
response to interleukin-2	0.855379	No
vsurf_CW8	0.854533	No
nucleotide-excision repair, DNA incision	0.854342	No
activation of JUN kinase activity	0.854296	No
regulation of phosphoprotein phosphatase activity	0.853804	No
neuromuscular junction	0.852447	No
adaptive immune response based on somatic recombination of immune receptors built from immunoglobulin superfamily domains	0.852419	No
positive regulation of blood vessel endothelial cell migration	0.85122	No
cellular lipid metabolic process	0.848972	No
modulation by virus of host morphology or physiology	0.848868	No
B cell receptor signaling pathway	0.848805	No
protein kinase binding	0.84863	No
positive regulation of immunoglobulin secretion	0.847156	No
lipid catabolic process	0.845871	No
mitotic nuclear envelope reassembly	0.84559	No
RNA binding	0.845557	No
enzyme inhibitor activity	0.844887	No
bile acid and bile salt transport	0.843963	No
lipid homeostasis	0.843631	No
positive regulation of cation channel activity	0.843204	No
dephosphorylation	0.843005	No
ubiquinone binding	0.842575	No
endoribonuclease activity	0.84257	No
negative regulation of ERK1 and ERK2 cascade	0.842332	No
alpha1-adrenergic receptor activity	0.841849	No
PML body	0.841499	No
face development	0.840903	No
response to hypoxia	0.840706	No
alpha-2A adrenergic receptor binding	0.840083	No
positive regulation of telomerase activity	0.839098	No
toll-like receptor TLR1:TLR2 signaling pathway	0.839072	No
cardiac neural crest cell development involved in outflow tract morphogenesis	0.837539	No
response to sulfur dioxide	0.835439	No
positive regulation of xenophagy	0.834638	No
regulation of smoothened signaling pathway	0.834591	No
dipeptidyl-peptidase activity	0.834282	No
positive regulation of granulocyte macrophage colony-stimulating factor production	0.832148	No
positive regulation of hair cycle	0.831556	No
platelet aggregation	0.831447	No
aldosterone biosynthetic process	0.830314	No
negative regulation of T cell activation	0.830143	No
peptidyl-lysine deacetylation	0.830093	No
transcription factor binding	0.829982	No
vitamin D3 25-hydroxylase activity	0.829025	No
positive regulation of exit from mitosis	0.828748	No
actin cytoskeleton	0.828551	No
purine nucleobase metabolic process	0.828475	No
D-aspartate oxidase activity	0.828448	No
regulation of programmed cell death	0.828299	No
nuclear inner membrane	0.828232	No
cell-substrate junction assembly	0.827698	No
regulation of cell differentiation	0.827528	No
nodal signaling pathway involved in determination of lateral mesoderm left/right asymmetry	0.8264	No
hepatocyte apoptotic process	0.825944	No
positive regulation of binding	0.825852	No
negative regulation of glutamine transport	0.825469	No
mitotic spindle assembly checkpoint	0.82444	No
regulation of translation	0.824182	No
regulation of complement activation	0.823658	No
peroxisome proliferator activated receptor binding	0.823592	No
positive regulation of transcription from RNA polymerase III promoter	0.823533	No
nuclear envelope	0.823243	No
estrogen biosynthetic process	0.823122	No
positive regulation of protein serine/threonine kinase activity	0.822948	No
eosinophil migration	0.821785	No
secretory granule	0.820759	No
positive regulation of progesterone biosynthetic process	0.82059	No
negative regulation of branching involved in lung morphogenesis	0.820498	No
antioxidant activity	0.820486	No
glyceraldehyde-3-phosphate dehydrogenase (NAD+) (phosphorylating) activity	0.819683	No
neuron recognition	0.819101	No
malate dehydrogenase activity	0.81858	No
peptidyl-cysteine S-trans-nitrosylation	0.81849	No
positive regulation of cell growth involved in cardiac muscle cell development	0.818449	No
regulation of gluconeogenesis	0.818334	No
NAD+ ADP-ribosyltransferase activity	0.818126	No
deacetylase activity	0.818018	No
potassium channel inhibitor activity	0.817679	No
regulation of DNA binding	0.817557	No
glycosaminoglycan catabolic process	0.817046	No
histone serine kinase activity	0.816923	No
phagocytosis	0.816888	No
positive regulation of acrosome reaction	0.816841	No
flavonoid metabolic process	0.81682	No
vsurf_CW5	0.816234	No
peptide hormone processing	0.815251	No
protein deacetylase activity	0.814508	No
anion transmembrane transport	0.81371	No
centrosome	0.812345	No
E-box binding	0.811346	No
positive regulation of vascular endothelial growth factor production	0.811239	No
malate dehydrogenase (NADP+) activity	0.811137	No
ERBB signaling pathway	0.810392	No
negative regulation of fatty acid metabolic process	0.809885	No
cell motility	0.809344	No
dATP binding	0.809104	No
energy homeostasis	0.809019	No
inflammatory cell apoptotic process	0.808325	No
ADP binding	0.807952	No
positive regulation of phospholipid biosynthetic process by positive regulation of transcription from RNA polymerase II promoter	0.80696	No
calcitriol biosynthetic process from calciol	0.806711	No
glucose homeostasis	0.806488	No
sequestering of triglyceride	0.805725	No
positive regulation of proteolysis	0.805644	No
prostaglandin-E synthase activity	0.805141	No
negative regulation of protein complex assembly	0.804485	No
regulation of fat cell differentiation	0.804379	No
cell growth	0.804174	No
bile acid metabolic process	0.80269	No
positive regulation of transcription factor import into nucleus	0.802068	No
tumor necrosis factor-mediated signaling pathway	0.801674	No
antiporter activity	0.801367	No
negative regulation of tumor necrosis factor-mediated signaling pathway	0.801004	No
intercellular canaliculus	0.80032	No
Notch receptor processing	0.799372	No
positive regulation of PERK-mediated unfolded protein response	0.798006	No
positive regulation of transcription from RNA polymerase II promoter	0.797628	No
glutamate metabolic process	0.796705	No
four-way junction DNA binding	0.796339	No
post-embryonic camera-type eye development	0.795739	No
Sertoli cell development	0.79553	No
ion transmembrane transport	0.795416	No
kynurenine-oxoglutarate transaminase activity	0.795387	No
homocysteine catabolic process	0.795141	No
cellular response to ammonium ion	0.794947	No
negative regulation of appetite	0.794458	No
negative regulation of ATPase activity	0.794187	No
methyltransferase activity	0.793808	No
positive regulation of peptidyl-serine phosphorylation of STAT protein	0.793764	No
negative regulation of natural killer cell chemotaxis	0.792194	No
DNA strand elongation	0.79174	No
potassium channel complex	0.791175	No
positive regulation of DNA-dependent DNA replication initiation	0.791038	No
negative regulation of cell-substrate adhesion	0.790986	No
regulation of protein stability	0.790043	No
14-3-3 protein binding	0.789865	No
response to bacterium	0.789439	No
chemokine-mediated signaling pathway	0.789193	No
proteasome binding	0.789028	No
negative regulation of NIK/NF-kappaB signaling	0.7879	No
regulation of mitochondrial membrane potential	0.786948	No
regulation of regulatory T cell differentiation	0.785924	No
hormone metabolic process	0.785272	No
vsurf_DW23	0.784595	No
alkane 1-monooxygenase activity	0.784356	No
ER to Golgi transport vesicle	0.782385	No
SlogP_VSA4	0.781685	No
necroptotic signaling pathway	0.779876	No
aging	0.778775	No
SMR_VSA4	0.778416	No
repressing transcription factor binding	0.777983	No
cell projection	0.775607	No
chylomicron	0.774205	No
drug metabolic process	0.769672	No
regulation of hydrogen peroxide metabolic process	0.76758	No
regulation of multicellular organism growth	0.76473	No
vsurf_HB7	0.764524	No
cellular response to ethanol	0.763836	No
negative regulation of voltage-gated calcium channel activity	0.763076	No
nucleus	0.762991	No
astrocyte cell migration	0.760777	No
DCASA	0.759362	No
PEOE_VSA-5	0.758353	No
positive regulation of cell growth	0.757362	No
'de novo' UMP biosynthetic process	0.754241	No
SlogP_VSA5	0.752746	No
toll-like receptor 4 signaling pathway	0.750608	No
phosphatase activity	0.748984	No
response to oxidative stress	0.748284	No
adult behavior	0.748092	No
lipid transport	0.747991	No
Y chromosome	0.747882	No
anaphase-promoting complex-dependent proteasomal ubiquitin-dependent protein catabolic process	0.746378	No
negative regulation of excitatory postsynaptic potential	0.744357	No
main axon	0.74415	No
opr_violation	0.743271	No
regulation of protein secretion	0.743206	No
positive regulation of transcription from RNA polymerase II promoter in response to oxidative stress	0.740436	No
growth	0.739747	No
positive regulation of fibril organization	0.738515	No
muscle organ development	0.737562	No
nuclear-transcribed mRNA catabolic process, deadenylation-dependent decay	0.737417	No
regulation of Golgi inheritance	0.736708	No
cholesterol transporter activity	0.736074	No
PEOE_VSA+2	0.733686	No
monocarboxylic acid transmembrane transporter activity	0.733095	No
C-X-C chemokine receptor activity	0.73249	No
axon guidance	0.731229	No
core promoter sequence-specific DNA binding	0.730942	No
regulation of protein import into nucleus, translocation	0.729462	No
ribosomal protein S6 kinase activity	0.72893	No
regulation of myeloid cell apoptotic process	0.727821	No
response to ATP	0.727502	No
regulation of gene silencing	0.727036	No
endosomal lumen acidification	0.72682	No
single strand break repair	0.726165	No
mitochondrial inner membrane	0.725917	No
cell differentiation	0.725036	No
phosphatidylinositol biosynthetic process	0.724538	No
vsurf_HB5	0.724457	No
oxidoreductase activity, acting on paired donors, with incorporation or reduction of molecular oxygen, NAD(P)H as one donor, and incorporation of one atom of oxygen	0.724104	No
response to interleukin-12	0.723876	No
proline-rich region binding	0.723705	No
integral component of plasma membrane	0.723671	No
transcription, RNA-templated	0.723151	No
sialic acid binding	0.722924	No
response to progesterone	0.72202	No
positive regulation of chemokine-mediated signaling pathway	0.721139	No
positive regulation of mitochondrial membrane potential	0.720412	No
positive regulation of mammary gland epithelial cell proliferation	0.720303	No
insulin-like growth factor II binding	0.719819	No
phosphatidylinositol-3-phosphate biosynthetic process	0.717768	No
regulation of systemic arterial blood pressure by vasopressin	0.71688	No
alkaloid catabolic process	0.714346	No
protein heterotetramerization	0.714061	No
substrate adhesion-dependent cell spreading	0.712674	No
ast_fraglike	0.7121	No
stress fiber	0.711954	No
hormone binding	0.710918	No
regulation of tumor necrosis factor-mediated signaling pathway	0.709535	No
mRNA binding	0.70946	No
microtubule cytoskeleton	0.708571	No
b_max1len	0.707659	No
T cell differentiation	0.707525	No
response to estradiol	0.707402	No
cell junction	0.706473	No
type III transforming growth factor beta receptor binding	0.706268	No
ER overload response	0.705569	No
response to cytokine	0.700196	No
positive regulation of toll-like receptor signaling pathway	0.699955	No
RNA polymerase II transcription factor activity, sequence-specific DNA binding	0.693576	No
fibronectin binding	0.693026	No
alkaloid metabolic process	0.692588	No
dens	0.691859	No
canalicular bile acid transmembrane transporter activity	0.691676	No
methyl-CpG binding	0.690757	No
G-protein coupled receptor activity	0.689595	No
nitric oxide binding	0.689504	No
positive regulation of vascular endothelial growth factor receptor signaling pathway	0.687249	No
nucleolus	0.687192	No
cellular response to diterpene	0.685817	No
endocytosis	0.685132	No
axonogenesis	0.684244	No
positive regulation of chemokine production	0.684057	No
protein serine/threonine/tyrosine kinase activity	0.683248	No
response to ozone	0.683215	No
negative regulation of programmed cell death	0.682998	No
regulation of T cell apoptotic process	0.682957	No
synaptic growth at neuromuscular junction	0.68122	No
release of cytochrome c from mitochondria	0.681042	No
late endosome	0.679228	No
positive regulation of cellular extravasation	0.67817	No
wound healing	0.677599	No
transmembrane transporter activity	0.676654	No
positive regulation of canonical Wnt signaling pathway	0.676442	No
citrate metabolic process	0.676116	No
reactive oxygen species metabolic process	0.675451	No
regulation of immune response	0.675282	No
poly(A) RNA binding	0.673427	No
acute inflammatory response	0.672848	No
lipid particle	0.668433	No
UV-damage excision repair	0.668395	No
neurotransmitter:sodium symporter activity	0.667014	No
endoplasmic reticulum membrane	0.66507	No
iron ion binding	0.660712	No
positive regulation of chondrocyte differentiation	0.660559	No
cholesterol transport	0.660415	No
vsurf_IW5	0.66003	No
death receptor binding	0.659977	No
cyclin-dependent protein kinase holoenzyme complex	0.659912	No
testosterone 6-beta-hydroxylase activity	0.658995	No
positive regulation of fatty acid oxidation	0.658591	No
regulation of early endosome to late endosome transport	0.658589	No
regulation of reactive oxygen species metabolic process	0.65799	No
Q_VSA_FPOS	0.657172	No
brush border membrane	0.656612	No
filopodium	0.655885	No
cerebral cortex cell migration	0.65477	No
positive regulation of DNA biosynthetic process	0.654586	No
JAK-STAT cascade involved in growth hormone signaling pathway	0.653837	No
opr_leadlike	0.652659	No
cellular response to lipoprotein particle stimulus	0.651191	No
cyclin-dependent protein serine/threonine kinase regulator activity	0.649517	No
insulin-like growth factor receptor binding	0.649443	No
positive regulation of sequestering of triglyceride	0.648346	No
adenylate cyclase-inhibiting G-protein coupled acetylcholine receptor signaling pathway	0.648174	No
response to leptin	0.647459	No
cellular ketone body metabolic process	0.646395	No
glycosaminoglycan metabolic process	0.645806	No
negative regulation of apolipoprotein binding	0.645335	No
glucose binding	0.645264	No
response to UV-B	0.645124	No
platelet alpha granule membrane	0.644404	No
negative regulation of protein ubiquitination	0.643833	No
thymus development	0.643431	No
steroid metabolic process	0.643326	No
protein stabilization	0.642971	No
omega-hydroxylase P450 pathway	0.642541	No
negative regulation of blood pressure	0.642283	No
cellular calcium ion homeostasis	0.642215	No
SMR_VSA2	0.642097	No
response to lipopolysaccharide	0.642047	No
regulation of endoplasmic reticulum stress-induced intrinsic apoptotic signaling pathway	0.641788	No
positive regulation of epithelial to mesenchymal transition	0.638981	No
negative regulation of cysteine-type endopeptidase activity involved in apoptotic process	0.638508	No
negative regulation of transforming growth factor-beta secretion	0.638007	No
a_nS	0.637988	No
female pregnancy	0.636585	No
2 iron, 2 sulfur cluster binding	0.635788	No
retrograde axonal transport	0.635779	No
catalytic step 2 spliceosome	0.63577	No
bile acid-exporting ATPase activity	0.635689	No
G-protein coupled receptor signaling pathway	0.634386	No
acetylcholine receptor binding	0.634166	No
response to insulin	0.634049	No
response to nutrient	0.633771	No
4-trimethylammoniobutyraldehyde dehydrogenase activity	0.633663	No
macrophage activation	0.633651	No
cellular response to serotonin	0.632035	No
endothelin receptor activity	0.631721	No
aldo-keto reductase (NADP) activity	0.631533	No
negative regulation of histone H4-K16 acetylation	0.63153	No
immunoglobulin binding	0.631527	No
dihydroorotase activity	0.631524	No
response to axon injury	0.631511	No
neuromuscular process controlling balance	0.631492	No
myristoyl-[acyl-carrier-protein] hydrolase activity	0.631175	No
(S)-limonene 6-monooxygenase activity	0.631144	No
negative regulation of histone H3-K14 acetylation	0.629432	No
trans-Golgi network	0.628355	No
ubiquitin protein ligase activity	0.628343	No
glucocorticoid metabolic process	0.62822	No
lithocholic acid binding	0.62725	No
regulation of cartilage development	0.627063	No
response to corticosterone	0.62634	No
antigen processing and presentation of peptide antigen via MHC class I	0.626145	No
negative regulation of glucuronosyltransferase activity	0.625177	No
cellular response to macrophage colony-stimulating factor stimulus	0.62511	No
epithelial cell maturation	0.624984	No
negative regulation of protein processing	0.624851	No
negative regulation of keratinocyte proliferation	0.623996	No
protein kinase B signaling	0.623415	No
T cell antigen processing and presentation	0.621947	No
protein polyubiquitination	0.621406	No
regulation of cell death	0.620793	No
global genome nucleotide-excision repair	0.619993	No
response to UV	0.619884	No
multicellular organismal response to stress	0.619701	No
branch elongation involved in mammary gland duct branching	0.619699	No
peptidyl-cysteine S-nitrosylation	0.618717	No
toll-like receptor TLR6:TLR2 signaling pathway	0.617761	No
mRNA transcription from RNA polymerase II promoter	0.616467	No
amino acid binding	0.616122	No
ast_fraglike_ext	0.616058	No
positive chemotaxis	0.615962	No
positive regulation of monocyte chemotactic protein-1 production	0.615962	No
negative regulation of dendrite development	0.615614	No
epidermis development	0.615585	No
cell adhesion	0.615406	No
heme metabolic process	0.615059	No
positive regulation of sequence-specific DNA binding transcription factor activity	0.613747	No
nucleobase-containing compound metabolic process	0.613616	No
response to external stimulus	0.613095	No
unmethylated CpG binding	0.612756	No
organelle organization	0.612614	No
histone H3-K9 modification	0.612178	No
ast_violation_ext	0.612027	No
positive regulation of T cell proliferation	0.611916	No
negative regulation of prostaglandin biosynthetic process	0.611534	No
mammary gland branching involved in thelarche	0.611284	No
intracellular receptor signaling pathway	0.610797	No
positive regulation of leukocyte migration	0.610636	No
positive regulation of lamellipodium assembly	0.609996	No
negative regulation of catalytic activity	0.609804	No
response to organonitrogen compound	0.608632	No
natural killer cell activation	0.608214	No
positive regulation of NAD+ ADP-ribosyltransferase activity	0.607513	No
heart morphogenesis	0.606868	No
positive regulation of protein localization to nucleolus	0.606868	No
DNA metabolic process	0.6066	No
positive regulation of neurotransmitter secretion	0.605791	No
activation of NF-kappaB-inducing kinase activity	0.605184	No
nitric oxide biosynthetic process	0.605139	No
regulation of insulin secretion	0.605013	No
regulation of protein phosphorylation	0.60329	No
negative regulation of protein kinase activity	0.602833	No
phosphatidylinositol 3-kinase complex	0.602657	No
platelet degranulation	0.602512	No
activation of innate immune response	0.602403	No
response to folic acid	0.602286	No
vsurf_HB6	0.601667	No
eyelid development in camera-type eye	0.601622	No
GTPase binding	0.601145	No
negative regulation of phagocytosis	0.599433	No
neurotrophin TRK receptor signaling pathway	0.598544	No
mammary gland development	0.59805	No
rings	0.59776	No
long-chain fatty acid metabolic process	0.597144	No
hair follicle development	0.596819	No
modulation of synaptic transmission	0.59681	No
peroxiredoxin activity	0.596365	No
cytoplasm	0.596104	No
ovarian follicle development	0.59573	No
anchored component of external side of plasma membrane	0.595305	No
oxysterol 7-alpha-hydroxylase activity	0.594099	No
nucleoside metabolic process	0.592676	No
calcium channel activity	0.591763	No
serotonin metabolic process	0.59175	No
extracellular exosome	0.59128	No
transcription cofactor binding	0.588621	No
quaternary ammonium group transport	0.58791	No
positive regulation of male gonad development	0.587498	No
mitotic spindle organization in nucleus	0.586201	No
negative regulation of prolactin signaling pathway	0.58579	No
sleep	0.585447	No
sodium channel regulator activity	0.584095	No
keratinocyte differentiation	0.584009	No
membrane repolarization during bundle of His cell action potential	0.583948	No
cytokine activity	0.583934	No
cellular response to hypoxia	0.583466	No
carboxylic acid binding	0.583208	No
response to histamine	0.582236	No
histone phosphorylation	0.582175	No
DNA binding	0.5808	No
melanosome	0.580453	No
protease binding	0.580301	No
histone deacetylation	0.580184	No
ATP binding	0.579868	No
galanin receptor activity	0.579702	No
positive regulation of fibroblast migration	0.579698	No
asymmetric synapse	0.578632	No
nicotinate-nucleotide adenylyltransferase activity	0.578594	No
response to immobilization stress	0.577918	No
perinuclear region of cytoplasm	0.5765	No
xenobiotic metabolic process	0.575757	No
positive regulation of blood pressure	0.575374	No
organic acid metabolic process	0.575275	No
cell activation	0.57497	No
NIK/NF-kappaB signaling	0.574918	No
negative regulation of neurotransmitter transport	0.574668	No
vsurf_IW1	0.574467	No
Golgi disassembly	0.574328	No
glutamate-cysteine ligase activity	0.574255	No
cellular process regulating host cell cycle in response to virus	0.574112	No
response to inorganic substance	0.573238	No
ammonia homeostasis	0.573107	No
regulation of cholesterol metabolic process	0.572345	No
positive regulation of tyrosine phosphorylation of Stat5 protein	0.572091	No
cellular oxidant detoxification	0.572038	No
response to UV-A	0.571312	No
response to L-ascorbic acid	0.571105	No
sensory perception of smell	0.571094	No
negative regulation of establishment of protein localization to plasma membrane	0.570988	No
enzyme activator activity	0.570948	No
superoxide anion generation	0.570855	No
positive regulation of membrane protein ectodomain proteolysis	0.569951	No
cellular water homeostasis	0.56989	No
toxin transport	0.569026	No
vasoconstriction	0.568947	No
negative regulation of Wnt signaling pathway	0.568909	No
temperature-gated cation channel activity	0.568316	No
dihydrofolate metabolic process	0.568203	No
substantia nigra development	0.567923	No
apolipoprotein receptor binding	0.566995	No
response to vitamin B3	0.566593	No
myelin maintenance	0.566372	No
basal lamina	0.565631	No
superoxide dismutase activity	0.564722	No
regulation of potassium ion transmembrane transporter activity	0.564638	No
actin filament polymerization	0.564389	No
regulation of branching involved in salivary gland morphogenesis	0.564004	No
negative regulation by host of viral process	0.56223	No
regulation of blood vessel remodeling	0.562161	No
cellular response to L-ascorbic acid	0.562017	No
axial mesoderm formation	0.561806	No
[truncated: 9,027 more rows]

## Sheet: Table S3
Table S3: Predicted Probabilities of Longevity effects of External Dataset DGIdb compounds
This table shows the predicted probability from our best model in the paper. The higher the probability the higher the probability the compound is longevity enhancing
Chemical Name	Predicted Probability
acrolein	0.690759
valspodar	0.683019
ganirelix	0.673963
acetaldehyde	0.668963
mmk-1	0.666556
rdp-58	0.665148
cetrorelix	0.656519
gal-b5	0.655815
m40	0.653963
DB03393	0.6495
bortezomib	0.649056
ro 25-1392	0.647074
gv1001	0.646981
lactose	0.646778
ergotamine	0.646426
cardiolipin	0.64287
dactinomycin	0.642315
abt-510	0.638963
aplyronine a	0.637019
valinomycin	0.636796
porfimer	0.635574
mast cell degranulating peptide	0.634407
m15	0.631759
galanin(1-15)	0.631222
nafarelin	0.630667
substance p	0.630296
d-23487	0.62963
eritoran	0.629056
ziconotide	0.628741
formic acid // formate	0.628648
neuropeptide w-23	0.62763
kisspeptin-13	0.627241
sgn-75	0.6265
iturelix	0.625722
humanin	0.624889
histrelin	0.624648
gr138676	0.622833
ginsenoside rg3	0.62237
temsirolimus	0.621593
oxalic acid	0.619889
galanin(2-11)	0.619852
bim 23056	0.619833
hcl	0.619667
degarelix	0.619648
antarelix	0.619556
abarelix	0.618667
apamin	0.618519
aod-9604	0.618278
galanin-like peptide	0.616759
kisspeptin-14	0.616111
[n-me,des-sar]gal-b2	0.614685
qrfp	0.613963
arsenic trioxide	0.613796
leptin	0.613667
rifabutin	0.612296
calyculin a	0.612259
orexin-b	0.610907
endothelin-1	0.610722
alx40-4c	0.609148
kassinin	0.609037
epofolate	0.608852
srif-28	0.608759
irl 1620	0.608111
pip<sub>2</sub>	0.607389
rifapentine	0.607019
nadh	0.606278
ep217609	0.60587
ac187	0.605667
neuropeptide b-23	0.605648
coenzyme a	0.605537
neurotensin	0.605167
cosyntropin	0.605093
aod9604	0.604944
viral macrophage inflammatory protein-ii	0.604889
ch 275	0.604833
c7	0.604685
1,2-diacyl-sn-glycero-3-phosphoinositol	0.603704
diapep277	0.603093
buserelin	0.602037
physalaemin	0.601944
goserelin	0.601833
prl-2915	0.601481
npc 17731	0.600907
leuprolide	0.600222
ccl2	0.599852
flavin adenine dinucleotide	0.59913
t-kinin	0.598667
phosphatidyl (3,5) inositol biphosphate	0.597981
eledoisin	0.597204
bimosiamose	0.59713
adenosine monophosphate	0.59687
neurokinin b	0.596722
ranatensin	0.596593
kisspeptin-10	0.596519
apelin-13	0.596019
cyanocobalamin	0.59537
ufp-112	0.593833
phyllomedusin	0.592963
cis-tetracosenoyl sulfatide	0.59037
docetaxel	0.590259
b-9858	0.590111
angiotensin ii	0.589815
kallstroemin d	0.589111
kabiramide c	0.589093
sarafotoxin s6c	0.589037
skf-105494	0.588889
tak-448	0.588815
neuropeptide ff	0.58837
hemokinin 1	0.587963
urotensin-ii	0.587593
cxcl8	0.587463
e339-3d6	0.587463
cortistatin-14	0.586556
dioscin	0.586167
hypoglaucin a	0.585315
ufp-101	0.585148
triptorelin	0.584537
bafilomycin b1	0.583852
afamelanotide	0.583741
met-lys-bradykinin	0.583241
contulakin-g	0.581556
gnrh i	0.58063
r-715	0.580315
1dme	0.580167
bradykinin	0.579796
neurokinin a	0.579648
hs014	0.57937
linaclotide	0.579259
npc-349	0.579204
deslanoside	0.578111
azd5582	0.577667
neuromedin u-8	0.577093
d(ch<sub>2</sub>)<sub>5</sub>[tyr(me)<sup>2</sup>]avp	0.576426
bim 23197	0.576204
erythromycin	0.576093
icatibant	0.575315
lanreotide	0.575222
sphinxolide b	0.574833
plecanatide	0.574815
bim 23058	0.574444
cgp 23996	0.574074
kos-2187	0.573685
phyllolitorin	0.573259
rifaximin	0.572204
hs024	0.571981
desflurane	0.571315
kallidin	0.571148
ulapualide a	0.57087
arachidonic acid	0.569796
conantokin-g	0.569796
glycyrrhizin	0.569741
npc-567	0.568741
e2078	0.568667
d[pen<sup>1</sup>,tyr(me)<sup>2</sup>]avp	0.568648
dynorphin b	0.568167
bivalirudin	0.567889
caspofungin	0.567185
bim 23127	0.565537
aclarubicin	0.565296
ridaforolimus	0.564815
sar3419	0.564352
gonadorelin	0.563389
reidispongiolide a	0.562741
b-10356	0.562426
ccl4	0.562315
bim 23060	0.562148
oleoyl-thiophosphate	0.561907
vapreotide	0.560444
nociceptin/orphanin fq	0.560352
hydroxyacetic acid	0.56
ccl3	0.559907
bantag-1	0.5595
d(ch<sub>2</sub>)<sub>5</sub>[tyr(et)<sup>2</sup>,val<sup>4</sup>,des-gly<sup>9</sup>]avp	0.558981
3-hydroxyglutaric acid	0.558944
sodium bicarbonate	0.558222
bim 23052	0.555815
motuporin	0.555148
bim 23068	0.554685
(2s,5r,8s,11r,12s,15s,18s,19s,e)-8-isobutyl-18-((5s,6s)-6-methoxy-3,5-dimethyl-7-phenylheptyl)-1,2,5,12,15,19-hexamethyl-3,6,9,13,16,20,25-heptaoxo-1,4,7,10,14,17,21-heptaazacyclopentacos-21-ene-11,22-dicarboxylic acid	0.554185
methyl isocyanide	0.554185
[phe<sup>3</sup>]ot	0.554167
rm-493	0.553963
bim 23313	0.553296
dexamethasone	0.553074
neuromedin b	0.552593
rhodei-litorin	0.551926
jaspisamide a	0.551852
l-709,587	0.551537
reidispongiolide c	0.551537
tacrolimus	0.550537
1,2-propanediol	0.549519
crotonaldehyde	0.549259
terlipressin	0.54913
bleomycin	0.548815
angiotensin a	0.548722
litorin	0.548185
azithromycin	0.547944
bim 23059	0.547685
azd4818	0.545852
dvdavp	0.5455
nitric oxide	0.545426
idrabiotaparinux	0.545111
mt-ii	0.544315
carbetocin	0.543537
isoflurane	0.543519
srif-14	0.543463
z-arg-leu-val-agly-ile-val-ome	0.543
figitumumab	0.542815
bim 23295	0.542556
cgp42112	0.541796
hyaluronan	0.541685
jmv458	0.541685
arginine vasotocin	0.540574
troleandomycin	0.539963
urofollitropin	0.539593
fk 224	0.53913
jmv180	0.538796
oxytocin	0.538593
tesetaxel	0.538019
digoxin	0.537352
bremelanotide	0.53687
enflurane	0.5365
ap811	0.536389
[thr<sup>4</sup>,gly<sup>7</sup>]ot	0.535685
ceruletide	0.535574
davp	0.534796
milataxel	0.534204
jmv431	0.533833
ellagic acid	0.533222
atorvastatin	0.532056
telithromycin	0.52987
jmv1431	0.529778
pasireotide	0.528852
[val<sup>4</sup>]avp	0.527519
bryostatin	0.526852
labradimil	0.525537
cyclohexane	0.525148
felypressin	0.524685
atosiban	0.524611
bim 23023	0.524611
kai-9803	0.524426
ortataxel	0.523481
clarithromycin	0.523463
urantide	0.522444
l-362,855	0.522315
halothane	0.52187
rfrp-3	0.521685
gr94800	0.520426
decitabine	0.520222
peptide iii-btd	0.52013
amylotriose	0.519889
pimecrolimus	0.519833
men 10376	0.519426
pg-901	0.519167
bim 23030	0.518519
rutin	0.51837
deoxy-bigchap	0.517685
roxithromycin	0.517389
[des-arg<sup>10</sup>]kallidin	0.517315
(2r)-3-{[{[(2s)-2,3-dihydroxypropyl]oxy}(hydroxy)phosphoryl]oxy}-2-[(9e)-hexadec-9-enoyloxy]propyl (9e)-octadec-9-enoate	0.517148
naringin	0.517074
ethyl isocyanide	0.517
ctop	0.515667
bim 23268	0.515315
a-71378	0.515185
correolide	0.51487
cabazitaxel	0.514519
mln1202	0.513907
alpha-ketoisovalerate	0.513037
octreotide	0.512889
angiotensin iii	0.512259
em-523	0.512056
m372049	0.511778
hexane	0.511185
dihydrogenphosphate ion	0.511093
fusicoccin	0.510556
gmi-1070	0.510352
nitrosoethane	0.509926
inno-206	0.507685
acetyldigitoxin	0.507648
1,4-diethylene dioxide	0.506963
ctap	0.506889
2-methyl-2-propanol	0.506537
vasopressin	0.506019
cyproheptadine	0.505019
zaragozic acid a	0.504111
nitrous oxide	0.50337
nepadutant	0.502963
methylumbelliferyl chitotriose	0.502648
trifluoroethanol	0.502537
trv120027	0.502278
spinorphin	0.502185
pmx53	0.501259
tartronate	0.501259
wkymvm	0.50063
l-156,602	0.499944
birinapant	0.499759
fluoro-phosphite ion	0.499611
idraparinux	0.498426
[sar,<small>d</small>-phe<sup>8</sup>,des-arg<sup>9</sup>]bradykinin	0.497574
cap-232	0.497389
bisphosphonates	0.496537
beta-mercaptoethanol	0.495111
mmi-175	0.494611
tripitramine	0.494148
seglitide	0.493759
crizotinib	0.492074
digitoxin	0.491926
1,3-propandiol	0.491296
[leu<sup>8</sup>,des-arg<sup>9</sup>]bradykinin	0.491222
r-486	0.490389
novokinin	0.488981
[des-arg<sup>9</sup>]bradykinin	0.487963
semapimod	0.487963
fpl-14294	0.487944
phlorizin	0.487759
carboxyatractyloside	0.487481
ro-27-3225	0.485463
pyruvoyl group	0.485093
desulfated cholecystokinin-8	0.484815
sf1126	0.483574
malonate ion	0.481889
l-363,377	0.481556
methyl isocyanate	0.481296
a-74498	0.481222
carfilzomib	0.480278
(z,z)-4-hydroxy-n,n,n-trimethyl-10-oxo-7-[(1-oxo-9-octadecenyl)oxy]-3,5,9-trioxa-4-phosphaheptacos-18-en-1-aminium-4-oxide	0.48013
dioleoylphosphatidic acid	0.479611
cck-8	0.479593
garcinol	0.478407
bafilomycin a1	0.478148
foretinib	0.478056
[<sup>14</sup>c]methylamine	0.477185
npy	0.476111
1,3,2-dioxaborolan-2-ol	0.475481
sevoflurane	0.475093
fondaparinux	0.474815
kos1326	0.473907
vinorelbine	0.473796
bim 23027	0.472685
sucrose	0.472389
2-arachidonoylglycerolphosphoinositol	0.471796
mitemcinal	0.471167
adenosine diphosphate	0.470362
l-366,875	0.470315
alpha-ketomalonic acid	0.47013
me67	0.469148
men10627	0.469093
acarbose derived hexasaccharide	0.468352
dasatinib	0.468167
3''-(beta-chloroethyl)-2'',4''-dioxo-3, 5''-spiro-oxazolidino-4-deacetoxy-vinblastine	0.468
angiotensin iv	0.467963
senktide	0.467907
septide	0.46787
n-propyl isocyanide	0.467593
galmic	0.467
dovitinib	0.466704
r396	0.466278
irinotecan	0.465463
methoxyflurane	0.465241
l-363,301	0.464944
di-linoleoyl-3-sn-phosphatidylcholine	0.464667
adenosine triphosphate	0.464511
trans-4-(guanidinomethyl)-cyclohexane-l-yl-d-3-cyclohexylalanyl-l-azetidine-2-yl-d-tyrosinyl-l-homoargininamide	0.464111
hexarelin	0.464019
palmitoyl-linoleoyl phosphatidylcholine	0.463389
ghrp-6	0.462796
phosphatidyl ethanol	0.462704
glutathionylspermidine disulfide	0.462278
[<sup>3</sup>h]s0139	0.461926
di-stearoyl-3-sn-phosphatidylcholine	0.461907
4-o-(4,6-dideoxy-4-{[4-[(4-o-hexopyranosylhexopyranosyl)oxy]-5,6-dihydroxy-3-(hydroxymethyl)cyclohex-2-en-1-yl]amino}hexopyranosyl)hexopyranose	0.461
ep-51216	0.460722
cyclohexyl-pentyl-maltoside	0.460537
eptifibatide	0.459593
chloropicrin	0.458889
imatinib	0.458667
dodecyl-alpha-d-maltoside	0.457056
myristoyl-coa	0.455907
gemcitabine	0.455389
1-3 sugar ring of pentamannosyl 6-phosphate	0.454963
methylethylamine	0.454833
2-acetamido-2-deoxy-beta-d-glucopyranose(beta1-4)-2-acetamido-1,6-anhydro-3-o-[(r)-1-carboxyethyl]-2-deoxy-beta-d-glucopyranose-l-alanyl-gamma-d-glutamyl-meso-diaminopimelyl-d-alanine	0.45437
atazanavir	0.453593
acetylcholine	0.451704
4-hydroxy-aconitate ion	0.451389
dstbulet	0.451352
2'-monophosphoadenosine 5'-diphosphoribose	0.451259
2-[3,4-dihydroxy-2-hydroxymethyl-5-(2-hydroxy-nonyl)-tetrahydro-furan-2-yloxy]-6-hydroxymethyl-tetra hydro-pyran-3,4,5-triol	0.451056
diphenylboronic anhydride	0.450241
deltorphin ii	0.449963
l-365,209	0.449463
virginiamycin factor s1	0.449444
peg-camptothecin	0.449204
navitoclax	0.448481
s-(2-oxo)pentadecylcoa	0.448426
alemcinal	0.448056
2-aminoethanimidic acid	0.447981
ethanolamine	0.447222
phenylmercury	0.445685
atracurium	0.444056
(2s)-2-[(2s)-2-[(2s)-2-[(2s)-2-{[(2s)-1-[(2s)-2-amino-3-phenylpropanoyl]pyrrolidin-2-yl]formamido}-3-(4-hydroxyphenyl)propanamido]-3-methylbutanamido]propanamido]pentanedioic acid	0.443815
doxacurium	0.443778
diphosphoric acid	0.442741
2-furoyl-ligrlo-amide	0.442241
etidronic acid	0.44213
mbp10	0.441981
daidzin	0.441296
2-ethoxyethanol	0.441
d-myo-inositol-1,4,5-triphosphate	0.44063
methylphosphinic acid	0.439278
benzyl bromide	0.439241
lindane	0.438796
l-366,682	0.438519
mivacurium	0.438444
gefitinib	0.437685
veratridine	0.436685
biie0246	0.436556
di-stearoyl-3-sn-phosphatidylethanolamine	0.436148
carboxymycobactin s	0.435722
thiodigalactoside	0.43487
5-fluoro-beta-l-gulosyl fluoride	0.434741
1,4-butanediol	0.43413
h type i trisaccharide	0.433889
n-octane	0.433537
coa-s-trimethylene-acetyl-tryptamine	0.433315
gw501516	0.43187
aconitate ion	0.430241
3r-hydroxydecanoyl-coa	0.430037
n-butyl isocyanide	0.430037
benzene hexacarboxylic acid	0.430019
pentagastrin	0.428741
alsterpaullone	0.427796
ritonavir	0.4275
dfgyvae	0.426981
4,6-dideoxy-4-{[4,5,6-trihydroxy-3-(hydroxymethyl)cyclohex-2-en-1-yl]amino}-alpha-d-lyxo-hexopyranosyl-(1->4)-alpha-d-threo-hexopyranosyl-(1->6)-alpha-l-threo-hexopyranose	0.42637
gentamicin	0.425815
vindesine	0.425611
lanosterol	0.425111
alendronate	0.424815
gantacurium	0.424704
beta-methyllactoside	0.423056
valrubicin	0.422815
octanoyl-coenzyme a	0.422667
flavin-adenine dinucleotide-n5-isobutyl ketone	0.41963
guanidine	0.419167
ardeparin	0.41813
triphospate	0.417093
berberine	0.417037
lys-coa	0.417037
tetramethylammonium ion	0.417
sinapoyl coenzyme a	0.416759
bosutinib	0.41363
feruloyl coenzyme a	0.412574
4-(n,n-dimethylamino)cinnamoyl-coa	0.412556
tris(hydroxymethyl)aminomethane	0.411963
coproporphyrin i	0.411667
edotecarin	0.411259
b3c	0.410815
3-phosphoglyceric acid	0.409593
1-azepan-1-yl-2-phenyl-2-(4-thioxo-1,4-dihydro-pyrazolo[3,4-d]pyrimidin-5-yl)ethanone adduct	0.407778
methyl-2-s-(alpha-d-mannopyranosyl)-2-thio-alpha-d-mannopyranoside	0.407611
3-thiaoctanoyl-coenzyme a	0.407593
1-hydroxy-3-methylbutane	0.406611
em-1745	0.406296
17-dmag	0.406185
heptulose-2-phosphate	0.405556
2,3-dihydro-1,4-dithiin-1,1,4,4-tetroxide	0.405481
prx-321	0.405167
4&alpha;-pdd	0.404407
tubacin	0.404185
l-myo-inositol-1-phosphate	0.404111
acetohydroxamic acid	0.404056
framycetin	0.403852
tricarballylic acid	0.403741
win 64338	0.403519
3-[aminoethylphosphoryl]-[1,2-di-palmitoyl]-sn-glycerol	0.40337
inositol-(1,3,4,5,6)-pentakisphosphate	0.403241
lauric acid	0.403185
coa-s-acetyl 5-bromotryptamine	0.403019
2-chlorophenol	0.401463
urea	0.40087
cyclotheonamide a	0.400722
dslet	0.400352
at-101	0.400222
hydroxydimethylarsine oxide	0.400019
l-366,948	0.399444
argadin	0.398574
coa-s-acetyl tryptamine	0.398093
sucrose octasulfate	0.397981
bromoacetone	0.397704
inositol 1,3-bisphosphate	0.39737
triglu-5-formyl-tetrahydrofolate	0.397093
alpha-d-glucose 1,6-bisphosphate	0.396574
p1-(5'-adenosyl)p5-(5'-(3'azido-3'-deoxythymidyl))pentaphosphate	0.396148
apicidin	0.395
2-bromoacetyl group	0.394944
datp	0.394907
telaprevir	0.393481
eribulin	0.392778
2-deoxy-2-fluoro-alpha-d-mannosyl fluoride	0.392741
1,6-di-o-phosphono-d-mannitol	0.392574
ado-p-ch2-p-ps-ado	0.392185
dihydrotachysterol	0.391667
4-methylumbelliferyl chitobiose	0.391519
sorbitol 6-phosphate	0.391444
bis(adenosine)-5'-pentaphosphate	0.391093
5,7-dihydroxy-2-(3,4,5-trihydroxyphenyl)-4h-chromen-4-one	0.390574
acipimox	0.390019
compound 1754-31	0.389037
ssr240612	0.387593
z-vdvad-fmk	0.387259
aldosterone	0.386093
pentanal	0.38587
2-deoxy-2fluoro-glucose	0.385111
nemifitide	0.385037
beta-dadf, msa, multisubstrate adduct inhibitor	0.384537
fostamatinib	0.38437
cr845	0.383907
7-methyl-gpppa	0.383667
inositol 1,3,4,5-tetrakisphosphate	0.383278
(s)-hmg-coa	0.380352
hyperforin	0.380333
guanine	0.380185
piperazine	0.380167
m1151	0.380093
saquinavir	0.380056
s-4-nitrobutyryl-coa	0.379648
2-phosphoglycolic acid	0.379481
para-bromobenzyl alcohol	0.379019
alpha-d-glucose-1-phosphate	0.378963
meclizine	0.378352
cyanamide	0.377167
revolade/promacta	0.375685
stibogluconate	0.375685
2-bromo-n-[(2s,3s)-4-[2-(2,4-dichlorophenyl)ethyl-[3-(1,3-dioxoisoindol-2-yl)propanoyl]amino]-3-hydroxy-1-[3-(phenoxy)phenyl]butan-2-yl]-4,5-dimethoxybenzamide	0.375333
pnu177836	0.375093
ipamorelin	0.375
argifin	0.374944
d-gluco-2,5-anhydro-1-deoxy-1-phosphonohexitol-6-phosphate	0.374519
brilliant blue g	0.373963
capsaicin	0.373704
fructose-1,6-diphosphate	0.372519
3-hydroxybutyryl-coenzyme a	0.372407
erlotinib	0.37237
p1-(adenosine-5'-p5-(uridine-5')pentaphosphate	0.372074
n-methyl ltc<sub>4</sub>	0.370833
nf546	0.370519
methacrylyl-coenzyme a	0.370352
fluvastatin	0.369815
1,2,4-triazole-carboxamidine	0.369444
chitotriose	0.36937
ryanodine	0.368352
trifluoroacetonyl coenzyme a	0.367741
pamidronate	0.367407
1-methoxy-2-(2-methoxyethoxy)ethane	0.367315
hexanoyl-coenzyme a	0.367241
6-phosphogluconic acid	0.367148
m-cresol	0.367074
incb13739	0.366315
phenylacetyl-arg-val-arg-4-amidinobenzylamide	0.366315
diquafosol	0.366204
phosphoaminophosphonic acid-adenylate ester	0.366019
enalkiren	0.365926
ribostamycin	0.365741
2,3-difluorobenzyl alcohol	0.364407
4-benzoylamino-4-{1-{1-carbamoyl-2-[4-(difluoro-phosphono-methyl)-phenyl]-ethylcarbamoyl}-2-[4-(difluoro-phosphono-methyl)-phenyl]-ethylcarbamoyl}-butyric acid	0.36413
p1-(5'-adenosyl)p5-(5'-thymidyl)pentaphosphate	0.363056
ergoloid mesylate	0.362833
gemfibrozil	0.361685
teniposide	0.3605
hexane-1,6-diol	0.360352
&beta;<sup>3</sup>-tetrapeptide	0.360315
cyclohexanol	0.360204
anisomycin	0.359852
mrs2927	0.359463
barbituric acid	0.358556
carbobenzoxy-pro-lys-phe-y(po2)-ala-pro-ome	0.358426
deamido-nad+	0.358204
acetoacetic acid	0.357611
tasidotin	0.357426
isobutyric acid	0.357389
acetyl-podocarpic dimer	0.356815
h type ii trisaccharide	0.356722
iralukast	0.356333
d-myo-inositol-1,4-bisphosphate	0.356315
25-hydroxycholesterol	0.355704
gluconolactone	0.354944
cnf1010	0.35487
alpha-d-mannose-6-phosphate	0.354667
rxp470.1	0.354111
4-[(10s,14s,18s)-18-(2-amino-2-oxoethyl)-14-(1-naphthylmethyl)-8,17,20-trioxo-7,16,19-triazaspiro[5.14]icos-11-en-10-yl]benzylphosphonic acid	0.354093
2,5-anhydroglucitol-1,6-biphosphate	0.353963
hesperetin	0.353778
probucol	0.353519
dithioerythritol	0.353481
2,4-difluorobenzyl alcohol 2,4-difluoro-1-(hydroxymethyl)benzene	0.353093
heparin disaccharide iii-s	0.353019
gsk-961081	0.352648
gamma hydroxybutyric acid	0.352389
ergocalciferol	0.352093
omega-chloroacetophenone	0.352074
acetoacetyl-coenzyme a	0.352019
guanosine-5'-diphosphate	0.3515
methyllycaconitine	0.3515
l-759,633	0.351426
uridine-5'-monophosphate glucopyranosyl-monophosphateester	0.351204
methiothepin	0.351019
4-o-(4,6-dideoxy-4-{[4,5,6-trihydroxy-3-(hydroxymethyl)cyclohex-2-en-1-yl]amino}-beta-d-lyxo-hexopyranosyl)-alpha-d-erythro-hexopyranose	0.350833
bq123	0.350519
ins48823	0.350333
iloprost	0.350148
maltosyl-alpha (1,4)-d-gluconhydroximo-1,5-lactam	0.349963
ethanesulfonic acid	0.349796
fructose-6-phosphate	0.349759
betulinic acid	0.3495
cilengitide	0.349481
tributylstannanyl	0.348852
5-methyltetrahydrofolate	0.348611
(2s)-n-[(2s,3r)-1-cyclohexyl-4,4-difluoro-3-hydroxy-4-{[(2s)-2-methylbutyl]carbamoyl}butan-2-yl]-2-[(2s)-2-[(morpholine-4-sulfonyl)amino]-3-phenylpropanamido]pent-4-enamide	0.348296
3,5-dihydroxybenzoic acid	0.347481
l-759,656	0.347111
d-4-phosphoerythronic acid	0.346926
bms-192548	0.346778
carvedilol	0.346759
itraconazole	0.346463
c-(1-azido-alpha-d-glucopyranosyl) formamide	0.346426
4-hydroxy-1,2,5-oxadiazole-3-carboxylic acid	0.345704
agi-1067	0.345704
l-alpha-glycerophospho-d-myo-inositol-4,5-bis-phosphate	0.345667
nicotinamide 8-bromo-adenine dinucleotide phosphate	0.345056
adenine	0.344796
voacamine	0.3445
cr665	0.344463
cysteinesulfonic acid	0.344185
alpha-fluoro-carboxymethyldethia coenzyme a complex	0.343074
z-dqmd-fmk	0.343019
tanespimycin	0.341426
nitromethyldethia coenzyme a	0.341204
4-deoxy-alpha-d-glucose	0.34113
compound 4 [pmid:23083103]	0.341056
lysophosphatidylinositol	0.341
bq788	0.340926
gsk690693	0.340704
olcegepant	0.340463
pentosan polysulfate	0.340037
resiniferatoxin	0.339481
1,2,4-triazole	0.338407
docosahexaenoic acid	0.338037
[(1e)-4-phenylbut-1-enyl]benzene	0.337907
nitroglycerin	0.337648
hadacidin	0.337444
cediranib	0.337426
g418	0.337389
pd-170292	0.337241
epirubicin	0.337167
octyl 3-deoxy-2-o-(6-deoxy-alpha-l-galactopyranosyl)-beta-d-xylo-hexopyranoside	0.337093
sr120819a	0.336444
argiotoxin	0.336204
pyrazole	0.336167
thionicotinamide-adenine-dinucleotide	0.335981
ciglitazone	0.335222
erythose-4-phosphate	0.335222
heparin disaccharide i-s	0.33513
z-veid-fmk	0.334815
jak3 inhibitor vi	0.334778
c-(1-hydrogyl-beta-d-glucopyranosyl) formamide	0.334667
aconitine	0.334333
2-phospho-d-glyceric acid	0.334185
octanol	0.334185
[<sup>3</sup>h]estradiol-17&beta;-glucuronide	0.333519
cenicriviroc	0.333444
indocyanine green	0.333444
ru90395	0.333278
o4-sulfonylgalactose	0.333241
{3-[3-(3,4-dimethoxy-phenyl)-1-(1-{1-[2-(3,4,5-trimethoxy-phenyl)-butyryl]-piperidin-2yl}-vinyloxy)-propyl]-phenoxy}-acetic acid	0.333037
calcein	0.33263
isothiourea	0.332407
trodusquemine	0.33213
2-deoxy-3,4-bis-o-[3-(4-hydroxyphenyl)propanoyl]-l-threo-pentaric acid	0.332093
amphetamine	0.331222
duroquinone	0.330926
<i>trans</i>-2-methylcrotonic acid	0.330111
nf157	0.32987
jsi-124	0.329185
naadp	0.328611
z-ietd-fmk	0.328611
4-hydroxy-2-butanone	0.328593
buclizine	0.328167
chlorobenzylidene malononitrile	0.328111
2h-1-benzopyran-2-one	0.328093
orotic acid	0.327444
n,o6-disulfo-glucosamine	0.327389
3,8,9,10-tetrahydroxy-7-hydroxymethyl-6-oxa-1,3-diaza-spiro[4.5]decane-2,4-dione	0.32737
ethyl dihydrogen phosphate	0.326704
capecitabine	0.326611
galnon	0.326185
2-cyclopropylmethylenepropanal	0.326037
gri977143	0.326037
ci-1033	0.324259
fludarabine	0.324111
[truncated: 5,930 more rows]
